# Supplementary material for: Selective oxidative intermolecular carbosulphenylation of aryl alkenes with thiols and nucleophiles via a 1,2-dithioethane intermediate
Source: Royal Society of Chemistry journal article supplement (doi:10.1039/d1cc02517a), 2021-01-01

## Supporting Information

### Selective oxidative intermolecular carbosulphenylation of aryl alkenes with thiols and nucleophiles via 1,2-dithioethane intermediate

Yuna Wang,<sup>a,b</sup> Zaojuan Qi,<sup>a</sup> Yannig Niu,<sup>c</sup> Feng Hua,<sup>\*b</sup> Enrico Benassi,<sup>\*a,d</sup> and Bo Qian<sup>\*a</sup>

<sup>a</sup>State Key Laboratory for Oxo Synthesis and Selective Oxidation, Lanzhou Institute of Chemical Physics, Chinese Academy of Sciences, Lanzhou 730000, P. R. China. E-mail: [ebenassi3@gmail.com](mailto:ebenassi3@gmail.com); [boqian@licp.cas.cn](mailto:boqian@licp.cas.cn)

<sup>b</sup>Address here. Key Laboratory of Eco-Environment-Related Polymer Materials Ministry of Education, College of Chemistry and Chemical Engineering, Northwest Normal University, Lanzhou, Gansu 730070, P. R. China. E-mail: [hfeng@nwnu.edu.cn](mailto:hfeng@nwnu.edu.cn)

<sup>c</sup>Department of Teaching and Research, Nanjing Forestry University, Huaian, 223003, P. R. China.

<sup>d</sup>Novosibirsk State University, Novosibirsk 630090, Russian Federation

## Contents

|          |                                                                   |            |
|----------|-------------------------------------------------------------------|------------|
| <b>1</b> | <b>General experimental details and materials .....</b>           | <b>S2</b>  |
| <b>2</b> | <b>Optimization of reaction conditions .....</b>                  | <b>S3</b>  |
| <b>3</b> | <b>General procedure for the carbosulfuration of alkene .....</b> | <b>S8</b>  |
| <b>4</b> | <b>Preliminary mechanistic studies .....</b>                      | <b>S9</b>  |
| <b>5</b> | <b>Synthetic application .....</b>                                | <b>S15</b> |
| <b>6</b> | <b>Experimental characterization data for products .....</b>      | <b>S17</b> |
| <b>7</b> | <b>Computational details and results .....</b>                    | <b>S39</b> |
| <b>8</b> | <b>References .....</b>                                           | <b>S63</b> |
| <b>9</b> | <b>Copies of NMR spectra of the products .....</b>                | <b>S65</b> |

## 1. General experiment details and materials

All non-aqueous reactions and manipulations were used by standard Schlenk techniques. All solvents before used were dried by standard methods and stored under nitrogen atmosphere. All reactions were monitored by TLC with silica gel-coated plates. NMR spectra were recorded on BRUKER AvanceIII (400 MHz) spectrometers. Chemical shifts were reported in parts per million (ppm) down field from tetramethylsilane (TMS) with the solvent resonance as the internal standard. Coupling constants (J) were reported in Hz and referred to apparent peak multiplications. High resolution mass spectra (HRMS) were recorded on Bruker Micro TOF-QII mass instrument (ESI). Gaschromatograph/massspectrometer (GC/MS) were recorded on Agilent 7890A/5975C system. Styrene derivates, thiophenol derivates and arene derivates used here were known compounds and commercially available.

## 2. Optimization of reaction conditions

Table S1. Screening of oxidant<sup>a</sup>

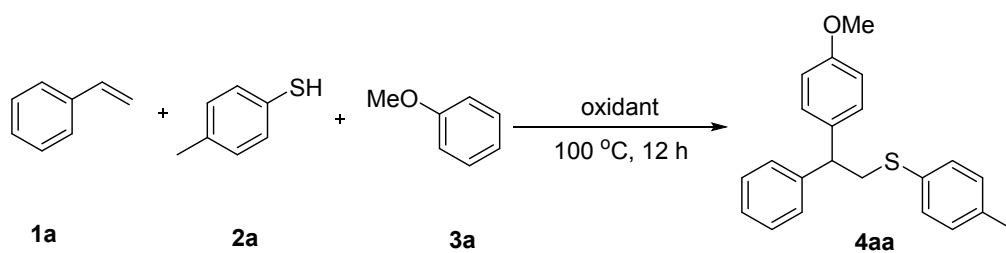

| Entry     | Oxidant                                             | Yield of <b>4aa</b> (%) <sup>b</sup> |
|-----------|-----------------------------------------------------|--------------------------------------|
| 1         | air                                                 | trace                                |
| 2         | O <sub>2</sub>                                      | trace                                |
| 3         | PhI(OAc) <sub>2</sub>                               | trace                                |
| 4         | TBHP                                                | 0                                    |
| 5         | DDQ                                                 | trace                                |
| 6         | NFSI                                                | trace                                |
| 7         | NaIO <sub>4</sub>                                   | 0                                    |
| 8         | NaCr <sub>2</sub> O <sub>7</sub> ·2H <sub>2</sub> O | 0                                    |
| 9         | NaClO                                               | 0                                    |
| 10        | KIO <sub>4</sub>                                    | 0                                    |
| 11        | LiClO <sub>4</sub>                                  | 6                                    |
| <b>12</b> | <b>LiIO<sub>4</sub>·2H<sub>2</sub>O</b>             | <b>67</b>                            |

<sup>a</sup>Reaction conditions: **1a** (0.75 mmol, 1.5 equiv), **2a** (0.5 mmol, 1 equiv), oxidant (0.25 mmol, 50 mol %), anisole **3a** (2.0 mL), 100 °C, 12 h, air. <sup>b</sup>Yield was determined by GC using 1,3,5-trimethoxybenzene as the internal standard.

**Table S2. Screening of amount of oxidant<sup>a</sup>**

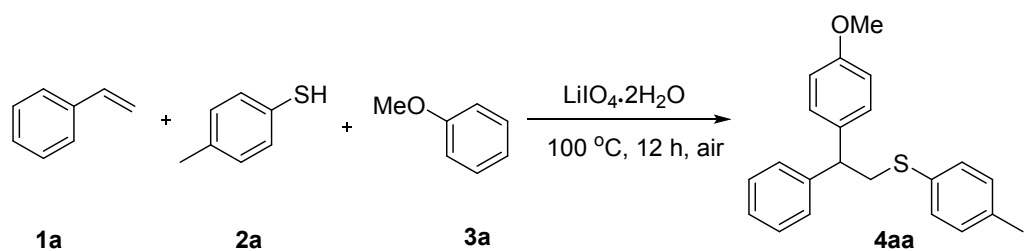

| Entry    | $\text{LiIO}_4 \cdot 2\text{H}_2\text{O}$<br>(mmol) | Yield of <b>4aa</b> (%) <sup>b</sup> |
|----------|-----------------------------------------------------|--------------------------------------|
| 1        | 0.05                                                | trace                                |
| 2        | 0.1                                                 | 20                                   |
| 3        | 0.15                                                | 37                                   |
| 4        | 0.2                                                 | 54                                   |
| <b>5</b> | <b>0.25</b>                                         | <b>67</b>                            |
| 6        | 0.3                                                 | 61                                   |
| 7        | 0.5                                                 | 54                                   |

<sup>a</sup>Reaction conditions: **1a** (0.75 mmol, 1.5 equiv), **2a** (0.5 mmol, 1 equiv), anisole **3a** (2.0 mL),  $100\text{ }^\circ\text{C}$ , 12 h, air. <sup>b</sup>Yield was determined by GC using 1,3,5-trimethoxybenzene as the internal standard.

**Table S3. Controlled variable experiment<sup>a</sup>**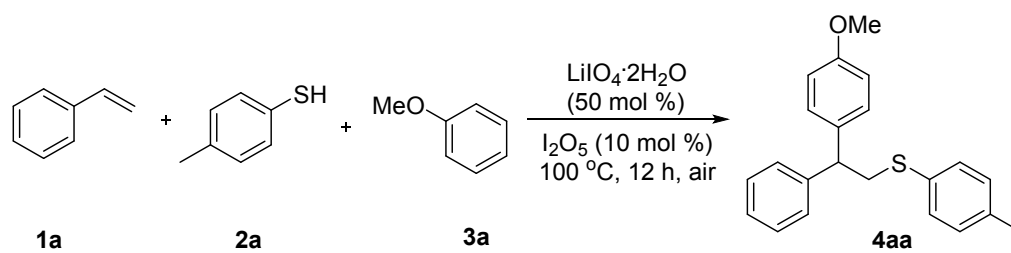

| Entry | $\text{LiIO}_4 \cdot 2\text{H}_2\text{O}$ | $\text{I}_2\text{O}_5$ | Yield of <b>4aa</b> (%) <sup>b</sup> |
|-------|-------------------------------------------|------------------------|--------------------------------------|
| 1     | /                                         | /                      | trace                                |
| 2     | 0.5 equiv                                 | /                      | 67                                   |
| 3     | 0.5 equiv                                 | 10 mol %               | 72 (75) <sup>c</sup>                 |

<sup>a</sup>Reaction conditions: **1a** (0.75 mmol, 1.5 equiv), **2a** (0.5 mmol, 1 equiv), anisole **3a** (2.0 mL),  $\text{I}_2\text{O}_5$  (0.05 mmol, 10 mol %),  $\text{LiIO}_4 \cdot 2\text{H}_2\text{O}$  (0.25 mmol, 50 mol %), 100 °C, 12 h, air. <sup>b</sup>Yield was determined by GC using 1,3,5-trimethoxybenzene as the internal standard. <sup>c</sup>Isolated yield.

**Table S4. Screening of solvent<sup>a</sup>**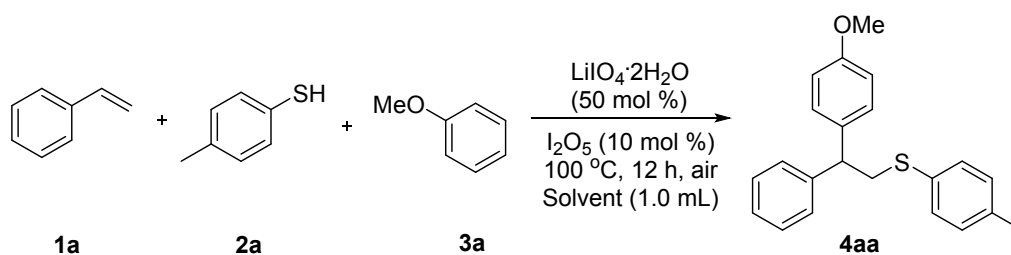

| Entry     | Solvent (1.0 mL)    | Yield of <b>4aa</b> (%) <sup>b</sup> |
|-----------|---------------------|--------------------------------------|
| 1         | DMSO                | 0                                    |
| 2         | DMF                 | 0                                    |
| 3         | DCE                 | 64                                   |
| 4         | benzotrifluoride    | 63                                   |
| 5         | nitrobenzene        | 62                                   |
| 6         | chlorobenzene       | 55                                   |
| 7         | <i>m</i> -xylene    | 28                                   |
| 8         | 1,2-dichlorobenzene | 65                                   |
| 9         | mesitylene          | 23                                   |
| 10        | fluorobenzene       | 70                                   |
| <b>11</b> | <b>anisole</b>      | <b>72</b>                            |

<sup>a</sup>Reaction conditions: **1a** (0.75 mmol, 1 equiv), **2a** (0.5 mmol, 1 equiv), **3a** (7.5 mmol, 15 equiv),  $\text{I}_2\text{O}_5$  (0.05 mmol, 10 mol %),  $\text{LiIO}_4 \cdot 2\text{H}_2\text{O}$  (0.25 mmol, 50 mol %), solvent (1.0 mL), 100 °C, 12 h, air. <sup>b</sup>Yield was determined by GC using 1,3,5-trimethoxybenzene as the internal standard.

**Table S5. Screening of temperature<sup>a</sup>**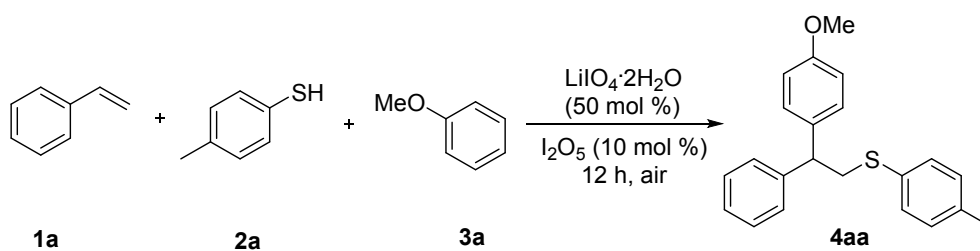

| Entry    | Temp. (°C) | Yield of <b>4aa</b> (%) <sup>b</sup> |
|----------|------------|--------------------------------------|
| 1        | 60         | 29                                   |
| 2        | 80         | 67                                   |
| <b>3</b> | <b>100</b> | <b>72</b>                            |
| 4        | 120        | 70                                   |

<sup>a</sup>Reaction conditions: **1a** (0.75 mmol, 1.5 equiv), **2a** (0.5 mmol, 1 equiv), **3a** (2.0 mL),  $\text{I}_2\text{O}_5$  (0.05 mmol, 10 mol %),  $\text{LiIO}_4 \cdot 2\text{H}_2\text{O}$  (0.25 mmol, 50 mol %), 12 h, air. <sup>b</sup>Yield was determined by GC using 1,3,5-trimethoxybenzene as the internal standard.

### 3. General procedure for the carbosulfuration of alkene

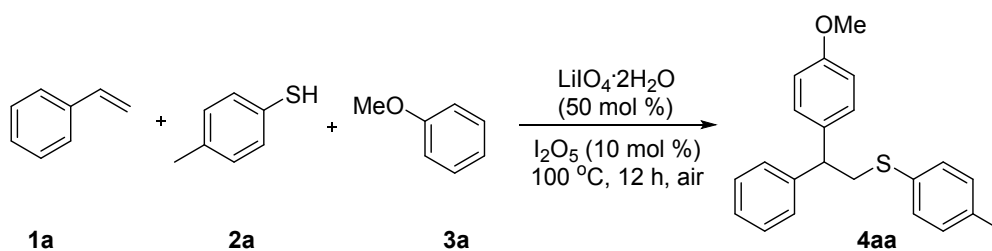

Under air atmosphere, styrene **1a** (86  $\mu\text{L}$ , 0.75 mmol, 1.5 equiv), thiol **2a** (62.1 mg, 0.5 mmol, 1 equiv),  $\text{LiIO}_4 \cdot 2\text{H}_2\text{O}$  (58.5 mg, 0.25 mmol, 50 mol %),  $\text{I}_2\text{O}_5$  (16.7 mg, 0.05 mmol, 10 mol %) and anisole **3a** (2.0 mL) were added into the reaction tube, and the mixture was stirred at 100 °C for 12 hours. After cooling to room temperature, the solvent was removed under reduced. Then the reaction mixture was purified by flash column chromatography on silica gel to give the desired product **4aa**.



## 4. Preliminary mechanistic studies

### (1) Radical trap experiments

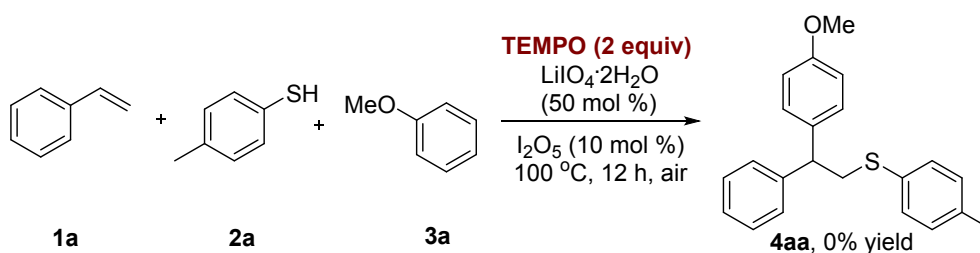

Under air atmosphere, **1a** (0.75 mmol, 1.5 equiv), **2a** (0.5 mmol, 1 equiv),  $\text{LiIO}_4 \cdot 2\text{H}_2\text{O}$  (58.5 mg, 0.25 mmol, 50 mol %),  $\text{I}_2\text{O}_5$  (16.7 mg, 0.05 mmol, 10 mol %), TEMPO (156 mg, 1.0 mmol, 2 equiv) and **3a** (2.0 mL) were added into the reaction tube, and the mixture was stirred at 100 °C for 12 hours. After cooling to room temperature, the solvent was detected by TLC and GC/MS. The product **4aa** could not be detected.

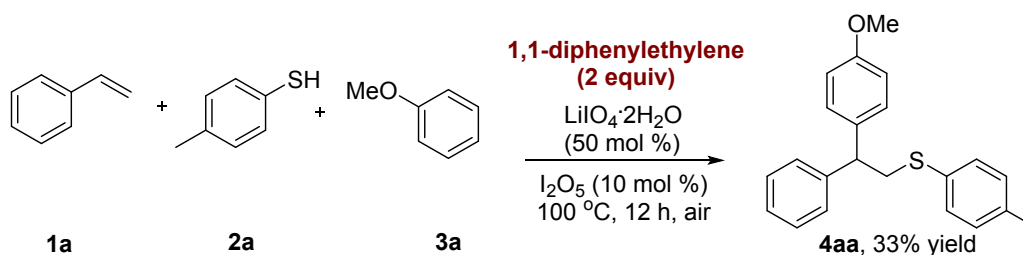

Under air atmosphere, **1a** (0.75 mmol, 1.5 equiv), **2a** (0.5 mmol, 1 equiv),  $\text{LiIO}_4 \cdot 2\text{H}_2\text{O}$  (58.5 mg, 0.25 mmol, 50 mol %),  $\text{I}_2\text{O}_5$  (16.7 mg, 0.05 mmol, 10 mol %), 1,1-diphenylethylene (180 mg, 1.0 mmol, 2 equiv) and anisole **3a** (2.0 mL) were added into the reaction tube, and the mixture was stirred at 100 °C for 12 hours. After cooling to room temperature, the reaction mixture was detected by GC using 1,3,5-trimethoxybenzene as the internal standard, giving 33% yield of product **4aa**.

Above results suggest that radical process might be involved into the reaction.

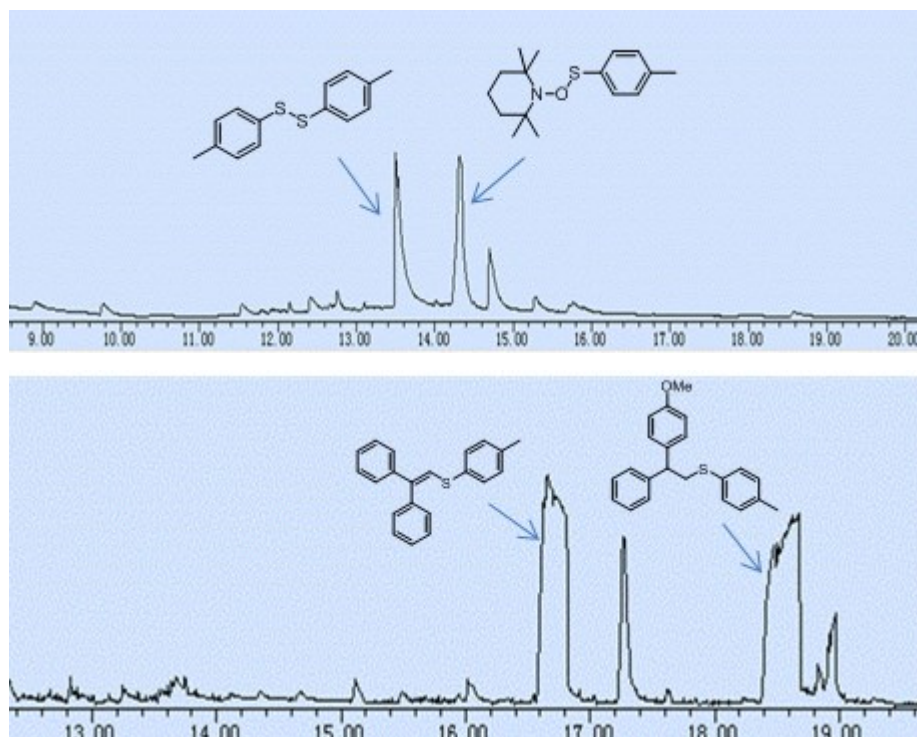

## (2) Cation trap experiment

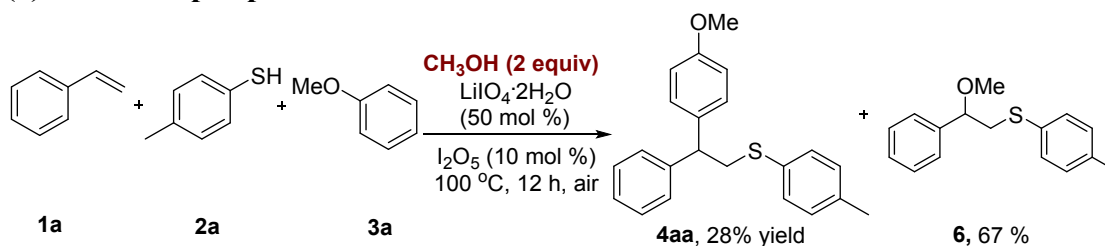

Under air atmosphere, **1a** (0.75 mmol, 1.5 equiv), **2a** (0.5 mmol, 1 equiv),  $\text{LiIO}_4 \cdot 2\text{H}_2\text{O}$  (58.5 mg, 0.25 mmol, 50 mol %),  $\text{I}_2\text{O}_5$  (16.7 mg, 0.05 mmol, 10 mol %),  $\text{CH}_3\text{OH}$  (40.5  $\mu\text{L}$ , 1.0 mmol, 2 equiv) and anisole **3a** (2.0 mL) were added into the reaction tube, and the mixture was stirred at 100  $^\circ\text{C}$  for 12 hours. After cooling to room temperature, the reaction mixture was detected by  $^1\text{H}$  NMR using 1,3,5-trimethoxybenzene as the internal standard, giving 28% yield of product **4aa** and 67% yield of **6**, respectively. The result suggests that cation species might be involved into the reaction.

## (3) Possible intermediates:

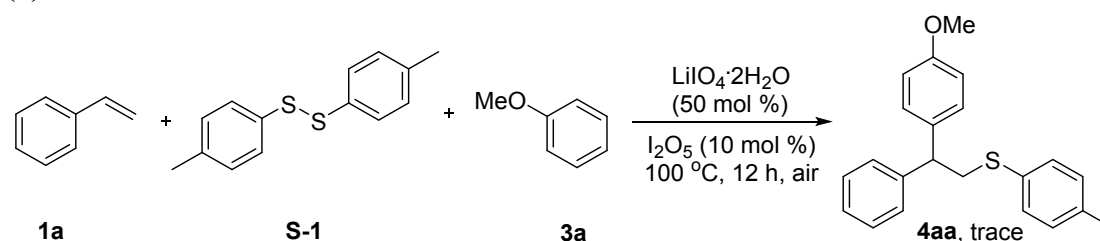

Under air atmosphere, **1a** (0.75 mmol, 1.5 equiv), **S-1** (0.25 mmol, 1 equiv),  $\text{LiIO}_4 \cdot 2\text{H}_2\text{O}$  (58.5 mg, 0.25 mmol, 50 mol %),  $\text{I}_2\text{O}_5$  (16.7 mg, 0.05 mmol, 10 mol %) and anisole **3a** (2.0 mL) were added into the reaction tube, and the mixture was stirred at 100 °C for 12 hours. After cooling to room temperature, the reaction mixture was detected by GC using 1,3,5-trimethoxybenzene as the internal standard, giving trace amount of product **4aa**.

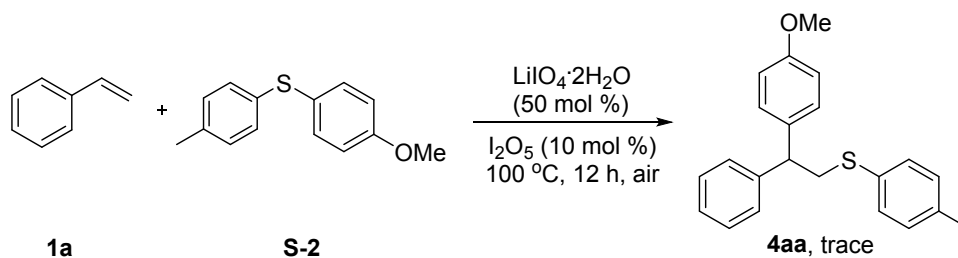

Under air atmosphere, **1a** (0.75 mmol, 1.5 equiv), **S-2** (0.5 mmol, 1 equiv),  $\text{LiIO}_4 \cdot 2\text{H}_2\text{O}$  (58.5 mg, 0.25 mmol, 50 mol %),  $\text{I}_2\text{O}_5$  (16.7 mg, 0.05 mmol, 10 mol %) and **3a** (2.0 mL) were added into the reaction tube, and the mixture was stirred at 100 °C for 12 hours. After cooling to room temperature, the reaction mixture was detected by GC using 1,3,5-trimethoxybenzene as the internal standard, giving trace amount of product **4aa**.

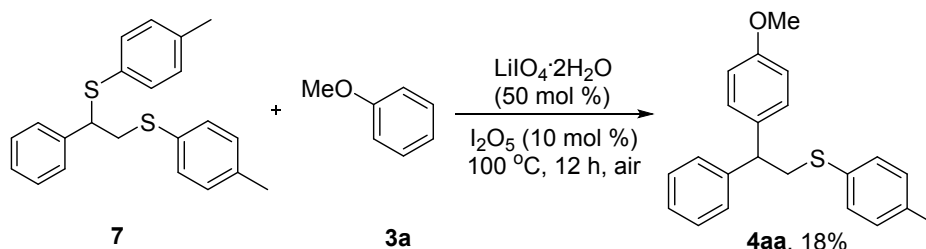

Under air atmosphere, **7** (0.5 mmol, 1 equiv), **3a** (15 mmol, 30 equiv),  $\text{LiIO}_4 \cdot 2\text{H}_2\text{O}$  (0.25 mmol, 50 mol %) and  $\text{I}_2\text{O}_5$  (0.05 mmol, 10 mol %) were added into the reaction tube, and the mixture was stirred at 100 °C for 12 hours. After cooling to room temperature, the reaction mixture was detected by GC using 1,3,5-trimethoxybenzene as the internal standard, giving 18% yield of product **4aa**.

#### (4) Reaction profiles:

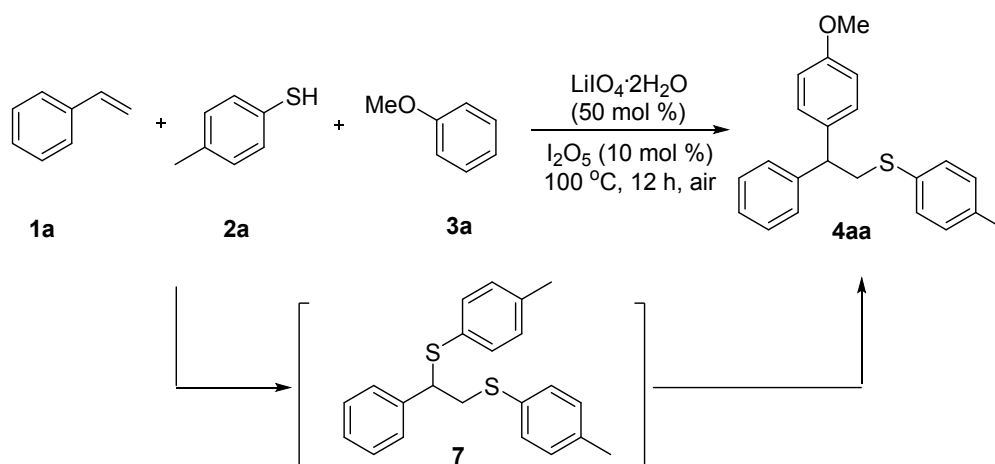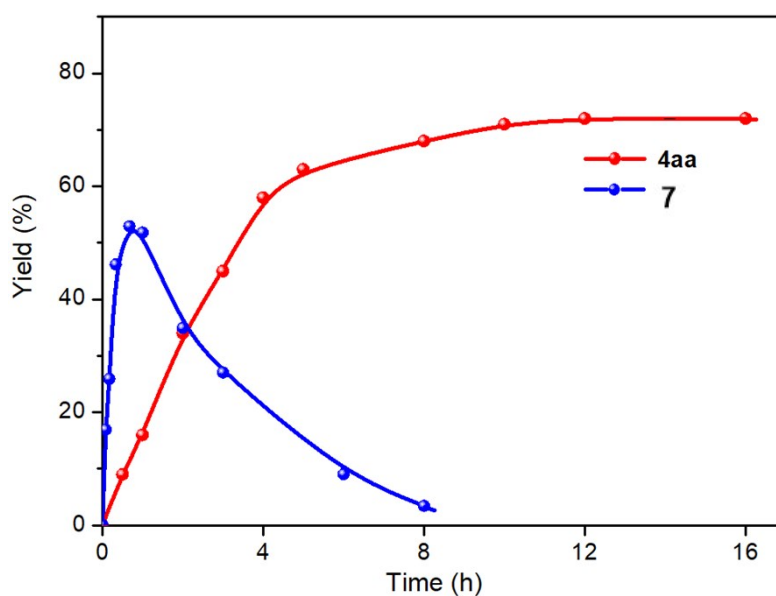

**Figure S1.** Reaction profiles

Reaction profiles depicted in Figure S1 support the hypothesis of a consecutive reaction mechanism:

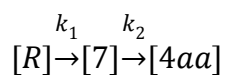

where R indicates the reactants (*i.e.* **1a**, **2a** and **3a**), and which can be solved analytically:

$$[7] = \frac{k_1}{k_2 - k_1} [R]_0 (e^{-k_1 t} - e^{-k_2 t})$$

$$[4aa] = [R]_0 \left[ 1 - \frac{1}{k_2 - k_1} (k_2 e^{-k_1 t} - k_1 e^{-k_2 t}) \right] \cong [R]_0 [1 - e^{-k_2 t}]$$

The time where the intermediate's concentration is max is:

$$\tilde{t} = \frac{\ln\left(\frac{k_1}{k_2}\right)}{k_1 - k_2}$$

From the profile of concentration of the product **4aa**, the values of  $[R]_0$  and of the kinetic constant  $k_2$  (the rate determining step) can be readily determined upon non-linear least-square regression, *viz.*  $[R]_0 = (73.4 \pm 1.4) \%$  and  $k_2 = (19.8 \pm 1.2) \text{ min}^{-1}$  (Adj- $R^2 = 0.99108$ ; Figure S2).

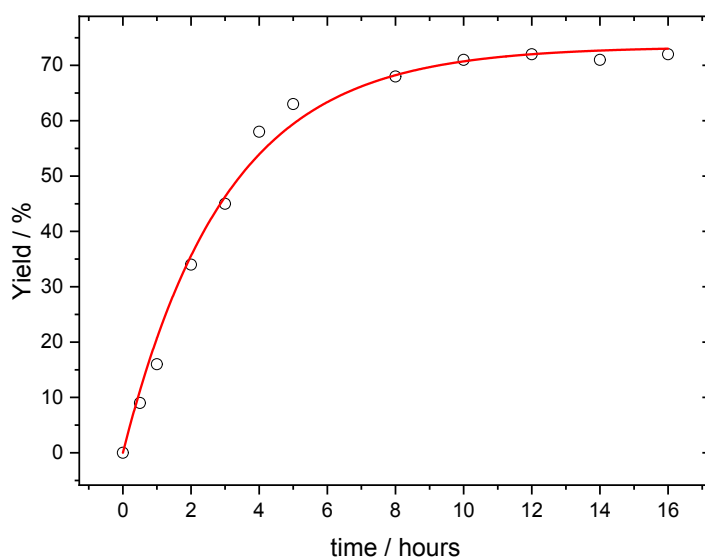

**Figure S2.** Product formation profile (circles) and fitting model (solid line).

#### Procedure for reaction profiles:

Under air atmosphere, **1a** (0.75 mmol, 1.5 equiv), **2a** (0.5 mmol, 1 equiv),  $\text{LiIO}_4 \cdot 2\text{H}_2\text{O}$  (0.25 mmol, 50 mol %),  $\text{I}_2\text{O}_5$  (0.05 mmol, 10 mol %) and **3a** (2.0 mL)

were added into the reaction tube, and the mixture was stirred at 100 °C for 0~16 hours. After cooling to room temperature and then analyzed by GC (the yield of product **4aa** and intermediate **7** was determined by GC using 1,3,5-trimethoxybenzene as the internal standard).

## 5. Synthetic applications

### (1) Gram scale experiment

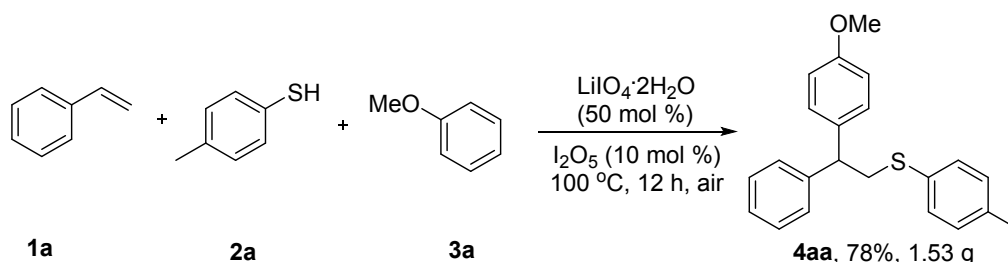

Under air atmosphere, **1a** (1.0 mL, 9 mmol, 1.5 equiv), **2a** (745 mg, 6 mmol, 1 equiv),  $\text{I}_2\text{O}_5$  (200 mg, 0.6 mmol, 10 mol %),  $\text{LiIO}_4 \cdot 2\text{H}_2\text{O}$  (702 mg, 3 mmol, 50 mol %) and **3a** (24 mL) were added into the reaction tube, and the mixture was stirred at 100 °C for 24 hours. After cooling to room temperature, the solvent was removed under reduced. Then the reaction mixture was purified by flash column chromatography on silica gel to give the desired product **4aa** in 78% yield (1.53 g).

### (2) Synthesis of sulfoxide

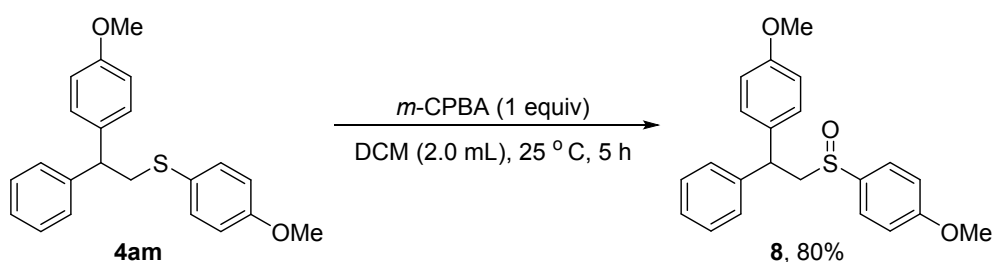

Under air atmosphere, **4am** (175 mg, 0.5 mmol, 1 equiv) and DCM (2.0 mL) were added into the reaction tube, *m*-CPBA (86.0 mg, 0.5 mmol, 1 equiv) was added under stirring at -15 °C. The mixture was stirred at 25 °C for 5 hours, then the reaction was quenched by 10 mL of NaOH saturated solution. The aqueous phase extracted with NaOH saturated solution (2×10 mL) and combined organic phases dried with  $\text{Na}_2\text{SO}_4$ . The solvent was removed under reduced pressure, then the reaction mixture was purified by flash column chromatography on silica gel and eluted with ethyl acetate/petroleum ether (1/5~1/1) to give sulfoxide **8** (146 mg, 80% yield, a white solid).

### (3) Synthesis of sulfone

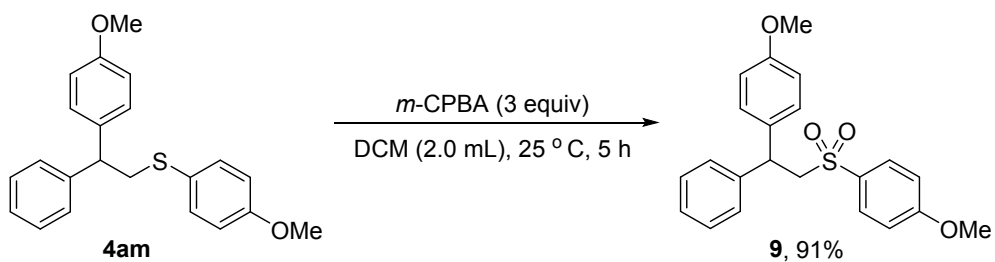

Under air atmosphere, **4am** (175.0 mg, 0.5 mmol, 1 equiv) and DCM (2.0 mL) were added into the reaction tube, *m*-CPBA (258 mg, 1.5 mmol, 3 equiv) was added under stirring at -4 °C. The mixture was stirred at 25 °C for 5 hours, then the reaction was quenched by 10 mL of NaOH saturated solution. The aqueous phase extracted with NaOH saturated solution (2×10 mL) and combined organic phases dried with Na<sub>2</sub>SO<sub>4</sub>. The solvent was removed under reduced pressure, then the reaction mixture was purified by flash column chromatography on silica gel and eluted with ethyl acetate/ petroleum ether (1/10~2/1) to give sulfone **9** (174 mg, 91% yield, a white solid).



## 6. Experimental characterization data for products

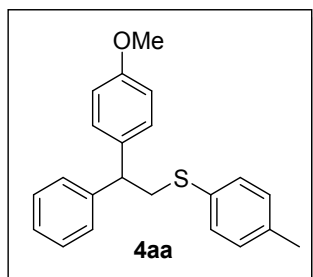

**(2-(4-Methoxyphenyl)-2-phenylethyl)(*p*-tolyl)sulfane (4aa):** A yellow oil, 125 mg, 75% yield.  $^1\text{H}$  NMR (400 MHz,  $\text{CDCl}_3$ )  $\delta$  7.20 (t,  $J = 7.6$  Hz, 2H), 7.15-7.11 (m, 5H), 7.06 (d,  $J = 8.5$  Hz, 2H), 7.00 (d,  $J = 7.9$  Hz, 2H), 6.75 (d,  $J = 8.6$  Hz, 2H), 4.05 (t,  $J = 7.9$  Hz, 1H), 3.68 (s, 3H), 3.44 (d,  $J = 7.9$  Hz, 2H), 2.23 (s, 3H);  $^{13}\text{C}$  NMR (100 MHz,  $\text{CDCl}_3$ )  $\delta$  158.3, 143.6, 136.3, 135.3, 132.8, 130.3, 129.8, 129.0, 128.6, 127.9, 126.6, 113.9, 55.3, 49.8, 40.6, 21.1; HRMS (ESI) calcd for  $\text{C}_{22}\text{H}_{23}\text{OS}$  [ $\text{M}+\text{H}$ ]: 335.1464, found: 335.1455.

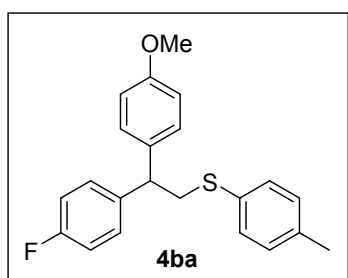

**(2-(4-Fluorophenyl)-2-(4-methoxyphenyl)ethyl)(*p*-tolyl)sulfane (4ba):** A yellow oil, 146 mg, 83% yield.  $^1\text{H}$  NMR (400 MHz,  $\text{CDCl}_3$ )  $\delta$  7.23-7.20 (m, 2H), 7.17-7.13 (m, 2H), 7.12-7.08 (m, 4H), 6.98-6.94 (m, 2H), 6.85-6.81 (m, 2H), 4.10 (t,  $J = 7.9$  Hz, 1H), 3.76 (s, 3H), 3.53-3.43 (m, 2H), 2.32 (s, 3H);  $^{13}\text{C}$  NMR (100 MHz,  $\text{CDCl}_3$ )  $\delta$  161.6 (d,  $J = 243.3$  Hz), 158.4, 139.2 (d,  $J = 3.3$  Hz), 136.4, 135.2, 132.5, 130.4, 129.8, 129.4 (d,  $J = 7.8$  Hz), 128.8, 115.4 (d,  $J = 21.1$  Hz), 114.0, 55.3, 49.0, 40.8, 21.1,  $^{19}\text{F}$  NMR (376 MHz,  $\text{CDCl}_3$ )  $\delta$  -116.4; HRMS (ESI) calcd for  $\text{C}_{22}\text{H}_{22}\text{FOS}$  [ $\text{M}+\text{H}$ ]: 353.1370, found: 353.1363.

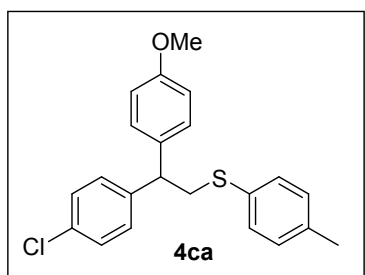

**(2-(4-Chlorophenyl)-2-(4-methoxyphenyl)ethyl)(*p*-tolyl)sulfane (4ca):** A yellow oil, 138 mg, 75% yield.  $^1\text{H}$  NMR (400 MHz,  $\text{CDCl}_3$ )  $\delta$  7.13-7.09 (m, 4H), 7.02-6.96 (m, 6H), 6.71 (d,  $J = 8.5$  Hz, 2H), 3.98 (t,  $J = 7.9$  Hz, 1H), 3.62 (s, 3H), 3.41-3.31 (m, 2H), 2.19 (s, 3H);  $^{13}\text{C}$  NMR (100 MHz,  $\text{CDCl}_3$ )  $\delta$  158.5, 142.0, 136.5, 134.9, 132.5, 132.4, 130.5, 129.9, 129.4, 128.9, 128.7, 114.1, 55.3, 49.2, 40.5, 21.2; HRMS (ESI) calcd for  $\text{C}_{22}\text{H}_{21}\text{ClNaOS}$  [ $\text{M}+\text{Na}$ ]: 391.0894, found: 391.0887.

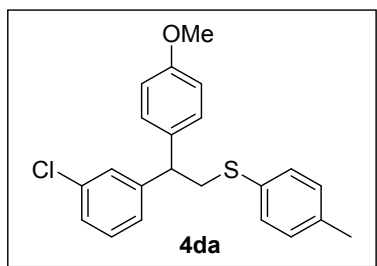

**(2-(3-Chlorophenyl)-2-(4-methoxyphenyl)ethyl)(*p*-tolyl)sulfane (4da):** A yellow oil, 65.5 mg, 36% yield.  $^1\text{H}$  NMR (400 MHz,  $\text{CDCl}_3$ )  $\delta$  7.20-7.17 (m, 3H), 7.12 (d,  $J = 5.3$  Hz, 2H), 7.08-7.03 (m, 5H), 6.79 (d,  $J = 8.3$  Hz, 2H), 4.06 (t,  $J = 7.9$  Hz, 1H), 3.68 (s, 3H), 3.44 (d,  $J = 8.0$  Hz, 2H), 2.26 (s, 3H);  $^{13}\text{C}$  NMR (100 MHz,  $\text{CDCl}_3$ )  $\delta$  158.6, 145.8, 136.6, 134.6, 134.4, 132.6, 130.6, 130.0, 129.9, 129.0, 128.2, 126.9, 126.3, 114.2, 55.3, 49.7, 40.5, 21.2; HRMS (ESI) calcd for  $\text{C}_{22}\text{H}_{21}\text{ClNaOS}$  [ $\text{M}+\text{Na}$ ]: 391.0894, found: 391.0897.

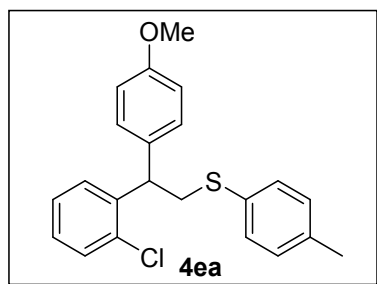

**(2-(2-Chlorophenyl)-2-(4-methoxyphenyl)ethyl)(*p*-tolyl)sulfane (4ea):** A yellow oil, 117 mg, 62% yield.  $^1\text{H}$  NMR (400 MHz,  $\text{CDCl}_3$ )  $\delta$  7.29-7.20 (m, 4H), 7.16-7.11 (m,

3H), 7.07-7.02 (m, 3H), 6.78 (d,  $J = 8.0$  Hz, 2H), 4.68 (t,  $J = 6.2$  Hz, 1H), 3.66 (s, 3H), 3.52-3.39 (m, 2H), 2.25 (s, 3H);  $^{13}\text{C}$  NMR (100 MHz,  $\text{CDCl}_3$ )  $\delta$  158.5, 140.9, 136.6, 134.4, 133.9, 132.7, 130.9, 130.0, 129.9, 129.5, 128.8, 128.0, 127.1, 114.1, 55.3, 46.0, 40.1, 21.3; HRMS (ESI) calcd for  $\text{C}_{22}\text{H}_{21}\text{ClNaOS}$  [ $\text{M}+\text{Na}$ ]: 391.0894, found: 391.0894.

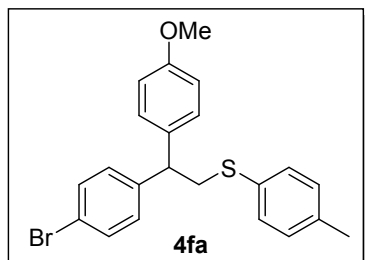

**(2-(4-Bromophenyl)-2-(4-methoxyphenyl)ethyl)(*p*-tolyl)sulfane (4fa):** A yellow oil, 143 mg, 69% yield.  $^1\text{H}$  NMR (400 MHz,  $\text{CDCl}_3$ )  $\delta$  7.34 (d,  $J = 8.0$  Hz, 2H), 7.18 (d,  $J = 7.8$  Hz, 2H), 7.04 (q,  $J = 7.6$  Hz, 2H), 6.79 (d,  $J = 8.3$  Hz, 2H), 4.05 (t,  $J = 7.8$  Hz, 1H), 3.69 (s, 3H), 3.48-3.39 (m, 2H), 2.27 (s, 3H);  $^{13}\text{C}$  NMR (100 MHz,  $\text{CDCl}_3$ )  $\delta$  158.5, 142.7, 136.5, 134.9, 132.6, 131.7, 130.5, 130.0, 129.9, 129.0, 120.6, 114.2, 55.3, 49.4, 40.5, 21.2; HRMS (ESI) calcd for  $\text{C}_{22}\text{H}_{21}\text{BrNaOS}$  [ $\text{M}+\text{Na}$ ]: 435.0389, found: 435.0391.

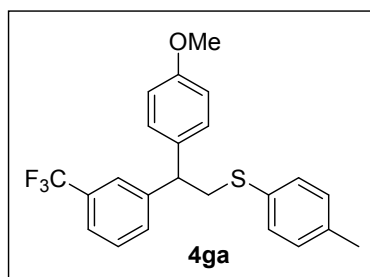

**(2-(4-Methoxyphenyl)-2-(3-**

**(trifluoromethyl)phenyl)ethyl)(*p*-tolyl)sulfane (4ga):** A yellow oil, 48.1 mg, 24% yield.  $^1\text{H}$  NMR (400 MHz,  $\text{CDCl}_3$ )  $\delta$  7.46-7.38 (m, 4H), 7.21 (d,  $J = 8.0$  Hz, 2H), 7.04 (dd,  $J_1 = 8.6$  Hz,  $J_2 = 12.3$  Hz, 4H), 6.84 (d,  $J = 8.7$  Hz, 2H), 4.16 (t,  $J = 7.8$  Hz, 1H), 3.77 (s, 3H), 3.56-3.46 (m, 2H), 2.32 (s, 3H);  $^{13}\text{C}$  NMR (100 MHz,  $\text{CDCl}_3$ )  $\delta$  158.5, 144.4, 136.7, 134.4, 132.1, 131.3, 130.9, 130.7, 130.6, 129.8, 129.7, 129.0, 128.9, 124.1 (dd,  $J_1 = 75.9$  Hz,  $J_2 = 197.9$  Hz), 55.3, 49.7, 40.5, 21.1.  $^{19}\text{F}$  NMR (376 MHz,  $\text{CDCl}_3$ )  $\delta$  -62.3; HRMS (ESI) calcd for  $\text{C}_{23}\text{H}_{22}\text{F}_3\text{OS}$  [ $\text{M}+\text{H}$ ]: 403.1338, found: 403.1330.

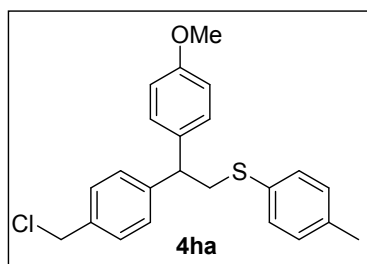

**(2-(4-(Chloromethyl)phenyl)-2-(4-methoxyphenyl)ethyl)(*p*-tolyl)sulfane (4ha):** A yellow oil, 39.1 mg, 20% yield.  $^1\text{H}$  NMR (400 MHz,  $\text{CDCl}_3$ )  $\delta$  7.30-7.07 (m, 10H), 6.82 (d,  $J = 8.2$  Hz, 2H), 4.53 (s, 2H), 4.12 (t,  $J = 7.9$  Hz, 1H), 3.75 (s, 3H), 3.49 (d,  $J = 7.8$  Hz, 2H), 2.31 (s, 3H);  $^{13}\text{C}$  NMR (100 MHz,  $\text{CDCl}_3$ )  $\delta$  158.4, 143.9, 136.4, 135.7, 135.0, 132.6, 130.4, 129.8, 128.9, 128.9, 128.3, 114.0, 55.3, 49.5, 46.1, 40.5, 21.1; HRMS (ESI) calcd for  $\text{C}_{23}\text{H}_{23}\text{ClNaOS}$  [ $\text{M}+\text{Na}$ ]: 405.1050, found: 405.1038.

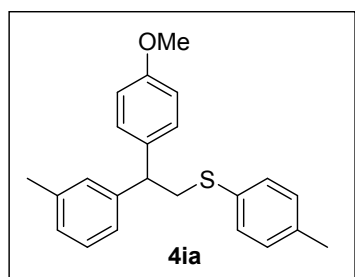

**(2-(4-Methoxyphenyl)-2-(*m*-tolyl)ethyl)(*p*-tolyl)sulfane (4ia):** A yellow oil, 128 mg, 74% yield.  $^1\text{H}$  NMR (400 MHz,  $\text{CDCl}_3$ )  $\delta$  7.22 (d,  $J = 8.2$  Hz, 2H), 7.17-7.13 (m, 3H), 7.07 (d,  $J = 7.9$  Hz, 2H), 7.03-6.99 (m, 3H), 6.82 (d,  $J = 8.7$  Hz, 2H), 4.09 (t,  $J = 7.9$  Hz, 1H), 3.75 (s, 3H), 3.54-3.48 (m, 2H), 2.30 (d,  $J = 5.5$  Hz, 6H);  $^{13}\text{C}$  NMR (100 MHz,  $\text{CDCl}_3$ )  $\delta$  158.3, 143.5, 138.1, 136.2, 135.4, 132.9, 130.2, 129.7, 129.0, 128.7, 128.5, 127.4, 124.8, 113.9, 55.3, 49.8, 40.6, 21.6, 21.1; HRMS (ESI) calcd for  $\text{C}_{23}\text{H}_{25}\text{OS}$  [ $\text{M}+\text{H}$ ]: 349.1621, found: 349.1621.

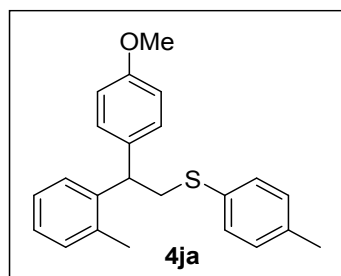

**(2-(4-Methoxyphenyl)-2-(*o*-tolyl)ethyl)(*p*-tolyl)sulfane (4ja):** A yellow oil, 147 mg, 84% yield.  $^1\text{H}$  NMR (400 MHz,  $\text{CDCl}_3$ )  $\delta$  7.30 (d,  $J = 7.6$  Hz, 1H), 7.20 (t,  $J = 8.0$  Hz,

3H), 7.14-7.06 (m, 6H), 6.79 (d,  $J = 8.6$  Hz, 2H), 4.30 (t,  $J = 7.8$  Hz, 1H), 3.73 (s, 3H), 3.53-3.42 (m, 2H), 2.30 (s, 3H), 2.14 (s, 3H);  $^{13}\text{C}$  NMR (100 MHz,  $\text{CDCl}_3$ )  $\delta$  158.2, 141.2, 136.4, 136.3, 134.9, 132.9, 130.7, 130.4, 129.8, 129.3, 126.6, 126.6, 126.1, 113.9, 55.3, 45.5, 40.8, 21.1, 19.8; HRMS (ESI) calcd for  $\text{C}_{23}\text{H}_{25}\text{OS}$  [ $\text{M}+\text{H}$ ]: 349.1621, found: 349.1618.

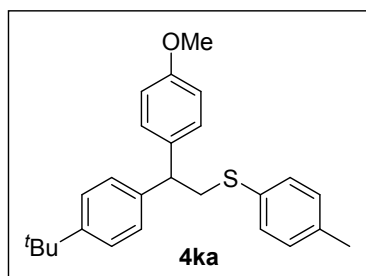

**(2-(4-(*tert*-Butyl)phenyl)-2-(4-methoxyphenyl)ethyl)(*p*-tolyl)sulfane (4ka):** A yellow oil, 147 mg, 75% yield.  $^1\text{H}$  NMR (400 MHz,  $\text{CDCl}_3$ )  $\delta$  7.28 (d,  $J = 8.4$  Hz, 2H), 7.21 (d,  $J = 7.8$  Hz, 2H), 7.16-7.12 (m, 4H), 7.06 (d,  $J = 7.8$  Hz, 2H), 6.82 (d,  $J = 8.7$  Hz, 2H), 4.11 (t,  $J = 7.8$  Hz, 1H), 3.74 (s, 3H), 3.56-3.46 (m, 2H), 2.29 (s, 3H), 1.27 (s, 9H);  $^{13}\text{C}$  NMR (100 MHz,  $\text{CDCl}_3$ )  $\delta$  158.3, 149.3, 140.6, 136.1, 135.4, 133.0, 130.2, 129.7, 129.0, 127.4, 125.5, 113.9, 55.3, 49.5, 40.7, 34.5, 31.5, 21.1; HRMS (ESI) calcd for  $\text{C}_{26}\text{H}_{31}\text{OS}$  [ $\text{M}+\text{H}$ ]: 391.2090, found: 391.2081.

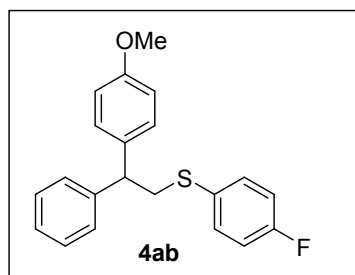

**(4-Fluorophenyl)(2-(4-methoxyphenyl)-2-phenylethyl)sulfane (4ab):** A yellow oil, 109 mg, 64% yield.  $^1\text{H}$  NMR (400 MHz,  $\text{CDCl}_3$ )  $\delta$  7.30-7.26 (m, 4H), 7.19 (d,  $J = 6.8$  Hz, 3H), 7.13 (d,  $J = 8.7$  Hz, 2H), 6.95 (t,  $J = 8.6$  Hz, 2H), 6.82 (d,  $J = 8.7$  Hz, 2H), 4.10 (t,  $J = 7.9$  Hz, 1H), 3.75 (s, 3H), 3.50 (d,  $J = 7.9$  Hz, 2H);  $^{13}\text{C}$  NMR (100 MHz,  $\text{CDCl}_3$ )  $\delta$  161.8 (d,  $J = 244.9$  Hz), 158.4, 143.4, 135.0, 132.6 (d,  $J = 7.8$  Hz), 131.4 (d,  $J = 3.3$  Hz), 128.9, 128.6, 127.9, 126.7, 116.1 (d,  $J = 21.9$  Hz), 114.0, 55.3, 49.9, 41.3,  $^{19}\text{F}$  NMR (376 MHz,  $\text{CDCl}_3$ )  $\delta$  -115.4; HRMS (ESI) calcd for  $\text{C}_{21}\text{H}_{19}\text{FNaOS}$  [ $\text{M}+\text{Na}$ ]: 361.1033, found: 361.1021.

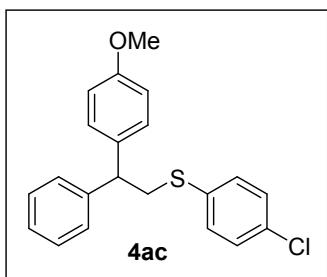

**(4-Chlorophenyl)(2-(4-methoxyphenyl)-2-phenylethyl)sulfane (4ac):** A yellow oil, 108 mg, 61% yield.  $^1\text{H}$  NMR (400 MHz,  $\text{CDCl}_3$ )  $\delta$  7.30-7.26 (m, 2H), 7.21-7.17 (m, 7H), 7.13 (d,  $J = 8.2$  Hz, 2H), 6.82 (d,  $J = 8.6$  Hz, 2H), 4.12 (t,  $J = 7.9$  Hz, 1H), 3.75 (s, 3H), 3.52 (d,  $J = 8.0$  Hz, 2H),  $^{13}\text{C}$  NMR (100 MHz,  $\text{CDCl}_3$ )  $\delta$  158.4, 143.3, 135.2, 134.9, 132.0, 130.8, 129.1, 128.9, 128.7, 127.8, 126.8, 114.0, 55.3, 49.8, 40.2; HRMS (ESI) calcd for  $\text{C}_{21}\text{H}_{19}\text{ClNaOS}$  [ $\text{M}+\text{Na}$ ]: 377.0737, found: 377.0732.

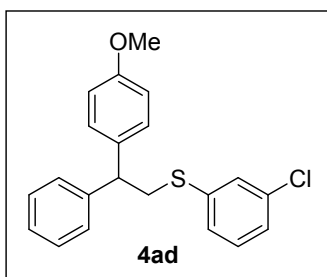

**(3-Chlorophenyl)(2-(4-methoxyphenyl)-2-phenylethyl)sulfane (4ad):** A yellow oil, 98.3 mg, 56% yield.  $^1\text{H}$  NMR (400 MHz,  $\text{CDCl}_3$ )  $\delta$  7.26-7.15 (m, 6H), 7.14-7.05 (m, 5H), 6.81-6.77 (m, 2H), 4.13 (t,  $J = 7.9$  Hz, 1H), 3.67 (s, 3H), 3.50 (d,  $J = 7.9$  Hz, 2H);  $^{13}\text{C}$  NMR (100 MHz,  $\text{CDCl}_3$ )  $\delta$  158.6, 143.4, 139.3, 135.0, 134.8, 130.1, 129.1, 128.8, 128.5, 128.0, 127.0, 127.0, 126.1, 114.2, 53.3, 49.9, 39.6; HRMS (ESI) calcd for  $\text{C}_{21}\text{H}_{19}\text{ClNaOS}$  [ $\text{M}+\text{Na}$ ]: 377.0737, found: 377.0739.

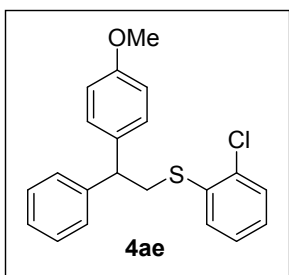

**(2-Chlorophenyl)(2-(4-methoxyphenyl)-2-phenylethyl)sulfane (4ae):** A yellow oil, 57.3 mg, 32% yield.  $^1\text{H}$  NMR (400 MHz,  $\text{CDCl}_3$ )  $\delta$  7.32-7.21 (m, 6H), 7.19-7.11 (m, 4H), 7.06-7.02 (m, 1H), 6.83-6.79 (m, 2H), 4.20 (t,  $J = 7.9$  Hz, 1H), 3.71 (s, 3H), 3.53

(d,  $J = 7.9$  Hz, 2H);  $^{13}\text{C}$  NMR (100 MHz,  $\text{CDCl}_3$ )  $\delta$  158.5, 143.4, 136.1, 135.0, 134.0, 129.8, 129.2, 129.0, 128.7, 127.9, 127.2, 126.8, 126.8, 114.1, 55.3, 49.7, 38.9; HRMS (ESI) calcd for  $\text{C}_{21}\text{H}_{19}\text{ClNaOS}$  [ $\text{M}+\text{Na}$ ]: 377.0737, found: 377.0737.

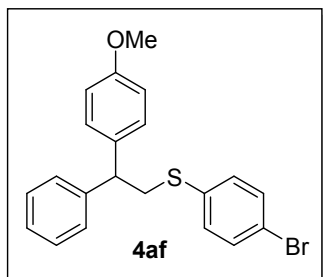

**(4-Bromophenyl)(2-(4-methoxyphenyl)-2-phenylethyl)sulfane (4af):** A yellow oil, 122 mg, 61% yield.  $^1\text{H}$  NMR (400 MHz,  $\text{CDCl}_3$ )  $\delta$  7.31 (d,  $J = 8.4$  Hz, 2H), 7.26-7.22 (m, 2H), 7.19-7.14 (m, 3H), 7.09 (t,  $J = 8.8$  Hz, 4H), 6.79 (d,  $J = 8.5$  Hz, 2H), 4.11 (t,  $J = 7.8$  Hz, 1H), 3.69 (s, 3H), 3.49 (d,  $J = 7.9$  Hz, 2H);  $^{13}\text{C}$  NMR (100 MHz,  $\text{CDCl}_3$ )  $\delta$  158.3, 143.2, 135.9, 134.8, 131.9, 130.7, 128.9, 128.6, 127.8, 126.7, 119.7, 114.0, 55.2, 49.7, 39.8; HRMS (ESI) calcd for  $\text{C}_{21}\text{H}_{19}\text{BrNaOS}$  [ $\text{M}+\text{Na}$ ]: 421.0232, found: 421.0223.

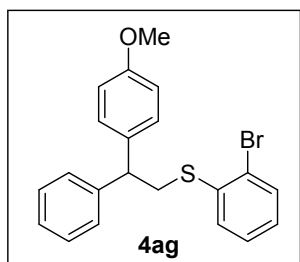

**(2-Bromophenyl)(2-(4-methoxyphenyl)-2-phenylethyl)sulfane (4ag):** A yellow oil, 39.4 mg, 29% yield.  $^1\text{H}$  NMR (400 MHz,  $\text{CDCl}_3$ )  $\delta$  7.49 (dd,  $J_1 = 1.3$  Hz,  $J_2 = 8.0$  Hz, 1H), 7.30-7.14 (m, 9H), 6.99-6.95 (m, 1H), 6.82 (d,  $J = 8.7$  Hz, 2H), 4.22 (t,  $J = 7.8$  Hz, 1H), 3.73 (s, 3H), 3.54 (d,  $J = 7.9$  Hz, 2H);  $^{13}\text{C}$  NMR (100 MHz,  $\text{CDCl}_3$ )  $\delta$  158.5, 143.4, 138.2, 135.0, 133.1, 129.0, 128.9, 128.7, 127.9, 127.8, 126.9, 126.8, 124.2, 114.1, 55.3, 49.6, 39.3; HRMS (ESI) calcd for  $\text{C}_{21}\text{H}_{19}\text{BrNaOS}$  [ $\text{M}+\text{Na}$ ]: 421.0232, found: 421.0226.

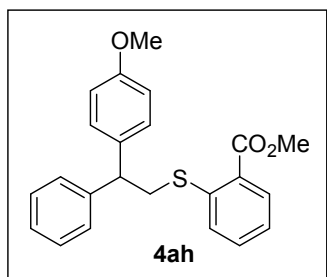

**Methy 2-((2-(4-methoxyphenyl)-2-phenylethyl)thio)benzoate (4ah):** A yellow solid, 113 mg, 60% yield.  $^1\text{H}$  NMR (400 MHz,  $\text{CDCl}_3$ )  $\delta$  7.92 (d,  $J = 7.7$  Hz, 1H), 7.42-7.34 (m, 2H), 7.31-7.25 (m, 4H), 7.22-7.18 (m, 3H), 7.13 (t,  $J = 7.6$  Hz, 1H), 6.83 (d,  $J = 8.6$  Hz, 2H), 4.27 (t,  $J = 7.7$  Hz, 1H), 3.83 (s, 3H), 3.74 (s, 3H), 3.55 (d,  $J = 7.7$  Hz, 2H);  $^{13}\text{C}$  NMR (100 MHz,  $\text{CDCl}_3$ )  $\delta$  166.9, 158.4, 143.6, 141.7, 135.2, 132.3, 131.2, 128.9, 128.7, 128.2, 127.8, 126.7, 126.2, 124.1, 114.0, 55.3, 52.1, 49.2, 38.6; HRMS (ESI) calcd for  $\text{C}_{23}\text{H}_{23}\text{O}_3\text{S}$  [M+H]: 379.1362, found: 379.1361.

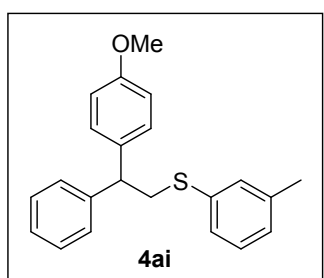

**(2-(4-Methoxyphenyl)-2-phenylethyl)(*m*-tolyl)sulfane (4ai):** A yellow oil, 131 mg, 78% yield.  $^1\text{H}$  NMR (400 MHz,  $\text{CDCl}_3$ )  $\delta$  7.29-7.24 (m, 2H), 7.22-7.17 (m, 3H), 7.16-7.08 (m, 5H), 6.97-6.94 (m, 1H), 6.83-6.79 (m, 2H), 4.15 (t,  $J = 7.9$  Hz, 1H), 3.72 (s, 3H), 3.54 (d,  $J = 8.0$  Hz, 2H), 2.29 (s, 3H);  $^{13}\text{C}$  NMR (100 MHz,  $\text{CDCl}_3$ )  $\delta$  158.4, 143.6, 138.8, 136.6, 135.3, 130.1, 129.0, 128.9, 128.7, 128.0, 127.0, 126.7, 126.4, 114.0, 55.3, 49.9, 39.9, 21.5; HRMS (ESI) calcd for  $\text{C}_{22}\text{H}_{23}\text{OS}$  [M+H]: 335.1464, found: 335.1463.

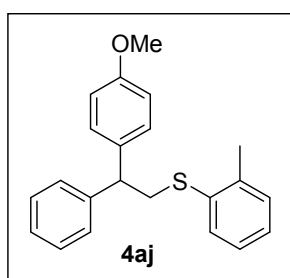

**(2-(4-Methoxyphenyl)-2-phenylethyl)(*o*-tolyl)sulfane (4aj):** A yellow oil, 117 mg,



70% yield.  $^1\text{H}$  NMR (400 MHz,  $\text{CDCl}_3$ )  $\delta$  7.26-7.16 (m, 5H), 7.15-7.06 (m, 5H), 7.04-6.99 (m, 1H), 6.77 (d,  $J = 8.6$  Hz, 2H), 4.14 (t,  $J = 7.8$  Hz, 1H), 3.63 (s, 3H), 3.47 (d,  $J = 8.0$  Hz, 2H), 2.23 (s, 3H);  $^{13}\text{C}$  NMR (100 MHz,  $\text{CDCl}_3$ )  $\delta$  158.6, 143.9, 138.1, 136.3, 135.5, 130.4, 129.2, 128.8, 128.6, 128.1, 126.7, 126.7, 126.1, 114.2, 55.4, 50.0, 39.4, 20.7; HRMS (ESI) calcd for  $\text{C}_{22}\text{H}_{22}\text{NaOS}$  [ $\text{M}+\text{Na}$ ]: 357.1284, found: 357.1280.

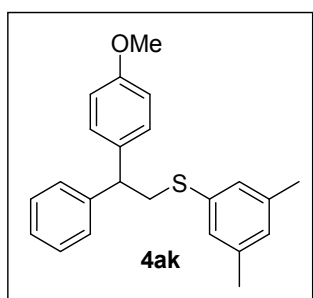

**(3,5-Dimethylphenyl)(2-(4-methoxyphenyl)-2-phenylethyl)sulfane (4ak):** A yellow solid, 108 mg, 62% yield.  $^1\text{H}$  NMR (400 MHz,  $\text{CDCl}_3$ )  $\delta$  7.24-7.17 (m, 4H), 7.15-7.09 (m, 3H), 6.90 (s, 2H), 6.76 (t,  $J = 8.6$  Hz, 3H), 4.15 (t,  $J = 7.8$  Hz, 1H), 3.64 (s, 3H), 3.51 (d,  $J = 7.8$  Hz, 2H), 2.20 (s, 6H);  $^{13}\text{C}$  NMR (100 MHz,  $\text{CDCl}_3$ )  $\delta$  158.5, 143.9, 143.9, 138.7, 136.6, 136.6, 135.5, 129.2, 128.8, 128.1, 127.2, 126.8, 114.2, 55.3, 50.2, 50.2, 40.0, 21.5; HRMS (ESI) calcd for  $\text{C}_{23}\text{H}_{25}\text{OS}$  [ $\text{M}+\text{H}$ ]: 349.1621, found: 349.1623.

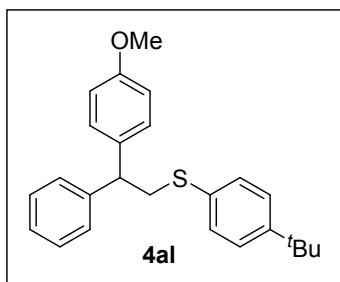

**(4-(*tert*-Butyl)phenyl)(2-(4-methoxyphenyl)-2-phenylethyl)sulfane (4al):** A yellow oil, 115 mg, 61% yield.  $^1\text{H}$  NMR (400 MHz,  $\text{CDCl}_3$ )  $\delta$  7.28-7.11 (m, 10H), 6.79 (d,  $J = 8.6$  Hz, 2H), 4.15 (t,  $J = 7.8$  Hz, 1H), 3.68 (s, 3H), 3.51 (d,  $J = 7.7$  Hz, 2H), 1.27 (s, 9H);  $^{13}\text{C}$  NMR (100 MHz,  $\text{CDCl}_3$ )  $\delta$  158.5, 149.4, 143.8, 135.4, 133.3, 129.8, 129.1, 128.7, 128.1, 126.8, 126.2, 114.1, 55.3, 50.1, 40.5, 34.6, 31.5; HRMS (ESI) calcd for  $\text{C}_{25}\text{H}_{29}\text{OS}$  [ $\text{M}+\text{H}$ ]: 377.1934, found: 377.1931.

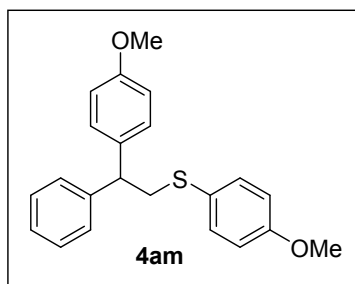

**(4-Methoxyphenyl)(2-(4-methoxyphenyl)-2-phenylethyl)sulfane (4am):** A yellow oil, 131 mg, 75% yield.  $^1\text{H}$  NMR (400 MHz,  $\text{CDCl}_3$ )  $\delta$  7.27 (dd,  $J_1 = 8.5$  Hz,  $J_2 = 15.1$  Hz, 4H), 7.18 (d,  $J = 7.6$  Hz, 3H), 7.12 (d,  $J = 8.5$  Hz, 2H), 6.81 (d,  $J = 8.6$  Hz, 4H), 4.08 (t,  $J = 7.9$  Hz, 1H), 3.74 (d,  $J = 9.0$  Hz, 6H), 3.45 (d,  $J = 7.9$  Hz, 2H);  $^{13}\text{C}$  NMR (100 MHz,  $\text{CDCl}_3$ )  $\delta$  159.0, 158.3, 143.6, 135.3, 133.4, 129.0, 128.6, 127.9, 126.6, 126.6, 114.7, 114.0, 55.4, 55.3, 49.9, 42.0; HRMS (ESI) calcd for  $\text{C}_{22}\text{H}_{23}\text{O}_2\text{S}$   $[\text{M}+\text{H}]$ : 351.1413, found: 351.1410.

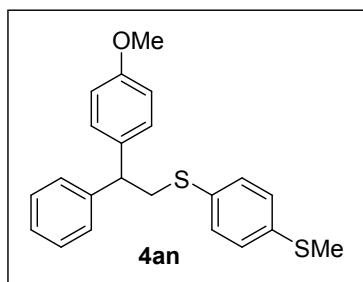

**(2-(4-Methoxyphenyl)-2-phenylethyl)(4-(methylthio)phenyl)sulfane (4an):** A yellow solid, 135 mg, 74% yield.  $^1\text{H}$  NMR (400 MHz,  $\text{CDCl}_3$ )  $\delta$  7.29-7.12 (m, 11H), 6.82 (d,  $J = 8.2$  Hz, 2H), 4.12 (t,  $J = 7.9$  Hz, 1H), 3.74 (s, 3H), 3.51 (d,  $J = 7.9$  Hz, 2H), 2.43 (s, 3H);  $^{13}\text{C}$  NMR (100 MHz,  $\text{CDCl}_3$ )  $\delta$  158.3, 143.4, 136.7, 135.1, 132.9, 130.6, 128.9, 128.6, 127.9, 127.2, 126.7, 114.0, 55.3, 49.8, 40.5, 16.0; HRMS (ESI) calcd for  $\text{C}_{22}\text{H}_{22}\text{NaOS}_2$   $[\text{M}+\text{Na}]$ : 389.1004, found: 389.1006.

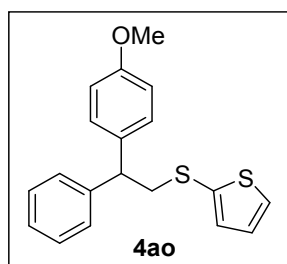

**2-((2-(4-Methoxyphenyl)-2-phenylethyl)thio)thiophene (4ao):** A yellow oil, 50.6 mg,

31% yield.  $^1\text{H}$  NMR (400 MHz,  $\text{CDCl}_3$ )  $\delta$  7.34-7.26 (m, 3H), 7.23-7.19 (m, 3H), 7.13 (d,  $J = 8.5$  Hz, 2H), 7.05-7.03 (m, 1H), 6.96-6.94 (m, 1H), 6.83 (d,  $J = 8.6$  Hz, 2H), 4.15 (t,  $J = 7.9$  Hz, 1H), 3.76 (s, 3H), 3.44 (d,  $J = 7.9$  Hz, 2H);  $^{13}\text{C}$  NMR (100 MHz,  $\text{CDCl}_3$ )  $\delta$  158.3, 143.2, 134.9, 134.6, 133.6, 129.3, 129.0, 128.6, 127.9, 127.6, 126.7, 114.0, 55.3, 49.8, 44.8; HRMS (ESI) calcd for  $\text{C}_{19}\text{H}_{19}\text{OS}_2$   $[\text{M}+\text{H}]$ : 327.0872, found: 327.0868.

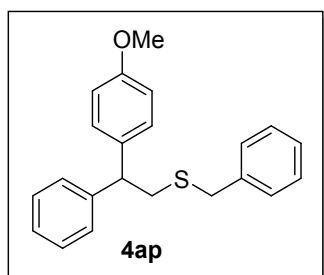

**Benzyl(2-(4-methoxyphenyl)-2-phenylethyl)sulfane (4ap):** A yellow oil, 65.4 mg, 39% yield.  $^1\text{H}$  NMR (400 MHz,  $\text{CDCl}_3$ )  $\delta$  7.27-7.21 (m, 7H), 7.16-7.11 (m, 3H), 7.05 (d,  $J = 8.6$  Hz, 2H), 6.77 (d,  $J = 8.6$  Hz, 2H), 4.00 (t,  $J = 7.8$  Hz, 1H), 3.66 (s, 3H), 3.57 (s, 2H), 3.02 (d,  $J = 7.9$  Hz, 2H);  $^{13}\text{C}$  NMR (100 MHz,  $\text{CDCl}_3$ )  $\delta$  158.4, 144.0, 138.6, 135.6, 129.1, 129.1, 128.6, 128.6, 128.0, 127.2, 126.7, 114.0, 53.3, 50.6, 37.5, 37.2; HRMS (ESI) calcd for  $\text{C}_{22}\text{H}_{23}\text{OS}$   $[\text{M}+\text{H}]$ : 335.1464, found: 335.1460.

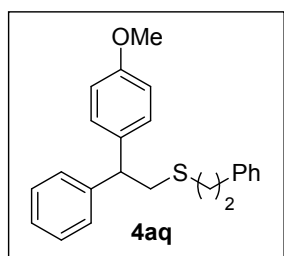

**(2-(4-Methoxyphenyl)-2-phenylethyl)(phenethyl)sulfane (4aq):** A yellow oil, 104 mg, 60% yield.  $^1\text{H}$  NMR (400 MHz,  $\text{CDCl}_3$ )  $\delta$  7.28-7.15 (m, 7H), 7.14-7.10 (m, 4H), 6.81 (d,  $J = 8.6$  Hz, 2H), 4.10 (t,  $J = 7.8$  Hz, 1H), 3.70 (s, 3H), 3.15 (d,  $J = 7.8$  Hz, 2H), 2.83-2.79 (m, 2H), 2.69-2.65 (m, 2H);  $^{13}\text{C}$  NMR (100 MHz,  $\text{CDCl}_3$ )  $\delta$  158.4, 144.0, 140.7, 135.7, 129.0, 128.7, 128.6, 128.6, 128.0, 126.7, 126.5, 114.1, 53.3, 50.9, 38.6, 36.5, 34.6; HRMS (ESI) calcd for  $\text{C}_{23}\text{H}_{25}\text{OS}$   $[\text{M}+\text{H}]$ : 349.1621, found: 349.1622.

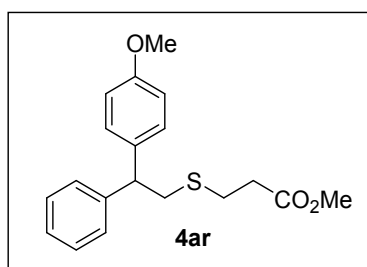

**Methyl 3-((2-(4-methoxyphenyl)-2-phenylethyl)thio)propanoate (4ar):** A yellow oil, 115 mg, 70% yield.  $^1\text{H}$  NMR (400 MHz,  $\text{CDCl}_3$ )  $\delta$  7.30-7.26 (m, 2H), 7.23-7.14 (m, 5H), 6.82 (d,  $J = 8.8$  Hz, 2H), 4.12 (t,  $J = 7.9$  Hz, 1H), 3.73 (s, 3H), 3.65 (s, 2H), 3.18 (d,  $J = 7.9$  Hz, 2H), 2.72 (t,  $J = 7.2$  Hz, 2H), 2.55 (t,  $J = 7.3$  Hz, 2H);  $^{13}\text{C}$  NMR (100 MHz,  $\text{CDCl}_3$ )  $\delta$  172.4, 158.3, 143.7, 135.4, 128.9, 128.6, 127.8, 126.6, 114.0, 55.2, 51.8, 50.6, 38.4, 34.7, 27.8; HRMS (ESI) calcd for  $\text{C}_{19}\text{H}_{23}\text{O}_3\text{S}$  [ $\text{M}+\text{H}$ ]: 331.1362, found: 331.1357.

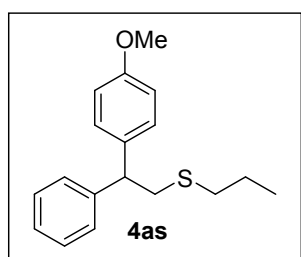

**(2-(4-Methoxyphenyl)-2-phenylethyl)(propyl)sulfane (4as):** A yellow oil, 76.4 mg, 53% yield.  $^1\text{H}$  NMR (400 MHz,  $\text{CDCl}_3$ )  $\delta$  7.29-7.22 (m, 4H), 7.19-7.15 (m, 3H), 6.82 (d,  $J = 8.5$  Hz, 2H), 4.12 (t,  $J = 7.9$  Hz, 1H), 3.73 (s, 3H), 3.15 (d,  $J = 7.9$  Hz, 2H), 2.43 (t,  $J = 7.2$  Hz, 2H), 1.61-1.52 (m, 2H), 0.93 (t,  $J = 7.3$  Hz, 3H);  $^{13}\text{C}$  NMR (100 MHz,  $\text{CDCl}_3$ )  $\delta$  158.3, 144.0, 135.7, 128.9, 128.6, 127.9, 126.6, 113.9, 55.3, 50.8, 38.3, 35.1, 23.0, 12.6; HRMS (ESI) calcd for  $\text{C}_{18}\text{H}_{23}\text{OS}$  [ $\text{M}+\text{H}$ ]: 287.1464, found: 287.1464.

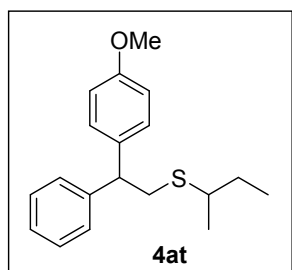

**Sec-butyl(2-(4-methoxyphenyl)-2-phenylethyl)sulfane (4at):** A yellow oil, 98.6 mg, 66% yield.  $^1\text{H}$  NMR (400 MHz,  $\text{CDCl}_3$ )  $\delta$  7.30-7.22 (m, 4H), 7.20-7.16 (m, 3H), 6.83

(d,  $J = 8.6$  Hz, 2H), 4.12 (t,  $J = 7.9$  Hz, 1H), 3.75 (s, 3H), 3.16 (d,  $J = 7.9$  Hz, 2H), 2.62 (q,  $J = 6.6$  Hz, 1H), 1.62-1.41 (m, 2H), 1.23 (d,  $J = 6.7$  Hz, 3H), 0.92 (t,  $J = 7.4$  Hz, 3H);  $^{13}\text{C}$  NMR (100 MHz,  $\text{CDCl}_3$ )  $\delta$  158.2, 144.1, 144.0, 135.8, 135.7, 128.9, 128.9, 128.5, 127.8, 127.8, 126.5, 113.9, 55.2, 51.1, 42.7, 36.4, 29.8, 20.9, 20.9, 11.5, 11.5; HRMS (ESI) calcd for  $\text{C}_{19}\text{H}_{25}\text{OS}$  [ $\text{M}+\text{H}$ ]: 301.1621, found: 301.1619.

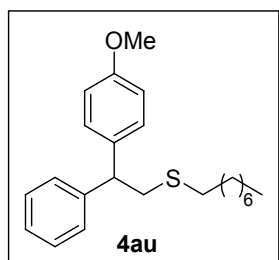

**(2-(4-Methoxyphenyl)-2-phenylethyl)(octyl)sulfane (4au):** A yellow oil, 107 mg, 60% yield.  $^1\text{H}$  NMR (400 MHz,  $\text{CDCl}_3$ )  $\delta$  7.30-7.22 (m, 4H), 7.21-7.15 (m, 3H), 6.83 (d,  $J = 8.7$  Hz, 2H), 4.12 (t,  $J = 7.8$  Hz, 1H), 3.75 (s, 3H), 3.16 (d,  $J = 7.8$  Hz, 2H), 2.44 (t,  $J = 7.4$  Hz, 2H), 1.58-1.50 (m, 2H), 1.34-1.25 (m, 10H), 0.88 (t,  $J = 6.4$  Hz, 3H);  $^{13}\text{C}$  NMR (100 MHz,  $\text{CDCl}_3$ )  $\delta$  158.2, 144.0, 135.7, 128.9, 128.5, 127.8, 126.5, 113.9, 55.2, 50.8, 38.3, 33.0, 31.9, 29.7, 29.2, 29.0, 22.7, 14.2; HRMS (ESI) calcd for  $\text{C}_{23}\text{H}_{33}\text{OS}$  [ $\text{M}+\text{H}$ ]: 357.2247, found: 357.2240.

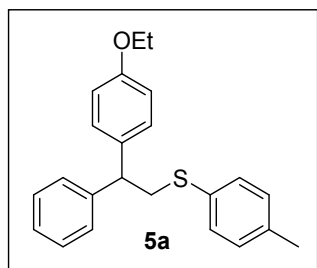

**(2-(4-Ethoxyphenyl)-2-phenylethyl)(p-tolyl)sulfane (5a):** A yellow oil, 146 mg, 84% yield (**1a** (0.75 mmol, 1.5 equiv), **2a** (0.5 mmol, 1 equiv), **3b** (7.5 mmol, 15 equiv), fluorobenzene (1.0 mL)).  $^1\text{H}$  NMR (400 MHz,  $\text{CDCl}_3$ )  $\delta$  7.27 (t,  $J = 7.5$  Hz, 2H), 7.22-7.18 (m, 5H), 7.11 (d,  $J = 8.7$  Hz, 2H), 7.06 (d,  $J = 7.9$  Hz, 2H), 6.80 (d,  $J = 8.6$  Hz, 2H), 4.16 (t,  $J = 7.9$  Hz, 1H), 3.96 (q,  $J = 7.0$  Hz, 2H), 3.51 (d,  $J = 7.9$  Hz, 2H), 2.30 (s, 3H), 1.36 (t,  $J = 7.0$  Hz, 3H);  $^{13}\text{C}$  NMR (100 MHz,  $\text{CDCl}_3$ )  $\delta$  157.7, 143.6, 136.2, 135.1, 132.9, 130.3, 129.8, 129.0, 128.6, 128.0, 126.6, 114.5, 63.4, 49.8, 40.6, 21.1, 15.0; HRMS (ESI) calcd for  $\text{C}_{23}\text{H}_{25}\text{OS}$  [ $\text{M}+\text{H}$ ]: 349.1621, found: 349.1619.

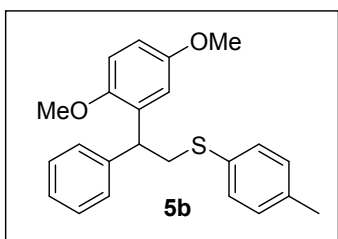

**(2-(2,5-Dimethoxyphenyl)-2-phenylethyl)(*p*-tolyl)sulfane (5b):** A yellow oil, 106 mg, 58% yield (**1a** (0.75 mmol, 1.5 equiv), **2a** (0.5 mmol, 1 equiv), **3c** (7.5 mmol, 15 equiv), fluorobenzene (2.0 mL)).  $^1\text{H}$  NMR (400 MHz,  $\text{CDCl}_3$ )  $\delta$ , 7.27-7.22 (m, 6H), 7.20-7.17 (m, 1H), 7.07 (d,  $J = 7.5$  Hz, 2H), 6.77-6.67 (m, 3H), 4.62 (t,  $J = 8.1$  Hz, 1H), 3.70 (d,  $J = 4.8$  Hz, 6H), 3.57 (dd,  $J_1 = 7.3$  Hz,  $J_2 = 12.8$  Hz, 1H), 3.44 (dd,  $J_1 = 8.6$  Hz,  $J_2 = 12.8$  Hz, 1H), 2.30 (s, 3H);  $^{13}\text{C}$  NMR (100 MHz,  $\text{CDCl}_3$ )  $\delta$  153.5, 151.4, 142.5, 136.0, 133.2, 133.0, 130.1, 129.6, 128.4, 128.4, 126.5, 115.3, 111.8, 111.2, 56.1, 55.6, 43.9, 39.1, 21.1; HRMS (ESI) calcd for  $\text{C}_{23}\text{H}_{25}\text{O}_2\text{S}$  [ $\text{M}+\text{H}$ ]: 365.1570, found: 365.1566.

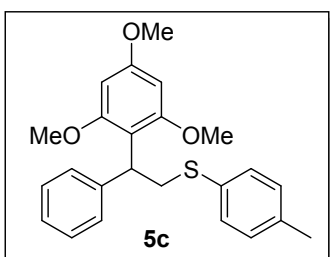

**(2-Phenyl-2-(2,4,6-trimethoxyphenyl)ethyl)(*p*-tolyl)sulfane (5c):** A yellow oil, 105 mg, 53% yield (**1a** (0.75 mmol, 1.5 equiv), **2a** (0.5 mmol, 1 equiv), **3d** (0.75 mmol, 1.5 equiv), fluorobenzene (2.0 mL)).  $^1\text{H}$  NMR (400 MHz,  $\text{CDCl}_3$ )  $\delta$  7.31 (d,  $J = 7.6$  Hz, 2H), 7.22-7.19 (m, 4H), 7.10 (t,  $J = 7.3$  Hz, 1H), 7.03 (d,  $J = 7.8$  Hz, 2H), 6.09 (s, 2H), 4.85 (t,  $J = 7.8$  Hz, 1H), 3.83 (dd,  $J_1 = 9.1$  Hz,  $J_2 = 12.6$  Hz, 1H), 3.74 (s, 3H), 3.69 (d,  $J = 7.1$  Hz, 1H), 3.67 (s, 6H), 2.27 (s, 3H);  $^{13}\text{C}$  NMR (100 MHz,  $\text{CDCl}_3$ )  $\delta$  160.0, 159.3, 143.9, 135.6, 133.7, 130.1, 129.4, 128.0, 127.8, 125.7, 112.0, 91.2, 55.7, 55.3, 39.5, 37.7, 21.1; HRMS (ESI) calcd for  $\text{C}_{24}\text{H}_{27}\text{O}_3\text{S}$  [ $\text{M}+\text{H}$ ]: 395.1675, found: 395.1675.

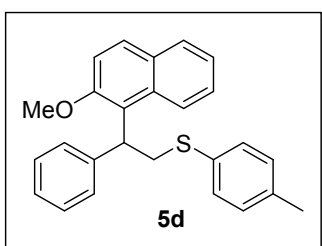

**(2-(2-Methoxynaphthalen-1-yl)-2-phenylethyl)(p-tolyl)sulfane (5d):** A yellow solid, 119 mg, 62% yield (**1a** (0.75 mmol, 1.5 equiv), **2a** (0.5 mmol, 1 equiv), **3e** (0.75 mmol, 1.5 equiv), fluorobenzene (2.0 mL)). <sup>1</sup>H NMR (400 MHz, CDCl<sub>3</sub>) δ 7.84-7.68 (m, 3H), 7.32-7.09 (m, 10H), 6.97 (d, *J* = 7.8 Hz, 2H), 5.25 (s, 1H), 3.98-3.88 (m, 2H), 3.65 (s, 3H), 2.24 (s, 3H); <sup>13</sup>C NMR (100 MHz, CDCl<sub>3</sub>) δ 155.7, 143.4, 136.1, 133.3, 130.4, 129.8, 129.8, 129.4, 129.0, 128.2, 128.0, 126.6, 126.1, 124.6, 123.7, 123.4, 114.5, 56.5, 41.9, 38.1, 21.2; HRMS (ESI) calcd for C<sub>26</sub>H<sub>24</sub>NaOS [M+Na]: 407.1440, found: 407.1433.

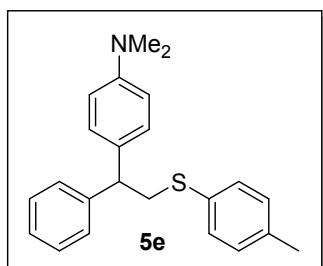

***N,N*-Dimethyl-4-(1-phenyl-2-(p-tolylthio)ethyl)aniline (5e):** A yellow solid, 13.8 mg, 8% yield (**1a** (0.75 mmol, 1.5 equiv), **2a** (0.5 mmol, 1 equiv), **3f** (0.75 mmol, 1.5 equiv), fluorobenzene (2.0 mL)). <sup>1</sup>H NMR (400 MHz, CDCl<sub>3</sub>) δ 7.27-7.25 (m, 2H), 7.23-7.21 (m, 4H), 7.19-7.16 (m, 1H), 7.11-7.06 (m, 4H), 4.09 (t, *J* = 7.9 Hz, 1H), 3.52 (d, *J* = 7.6 Hz, 2H), 2.90 (s, 6H), 2.31 (s, 3H); <sup>13</sup>C NMR (100 MHz, CDCl<sub>3</sub>) δ 149.4, 143.9, 136.0, 133.1, 131.2, 130.1, 129.7, 128.6, 128.5, 127.9, 126.4, 112.7, 49.7, 10.7, 40.6, 21.1; HRMS (ESI) calcd for C<sub>23</sub>H<sub>26</sub>NS [M+H]: 348.1780, found: 348.1775.

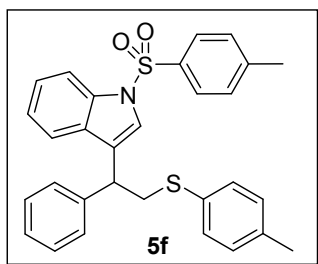

**1-(3-(1-Phenyl-2-(p-tolylthio)ethyl)-1*H*-indol-1-yl)ethan-1-one (5f):** A white solid, 19.9 mg, 8% yield (**1a** (0.75 mmol, 1.5 equiv), **2a** (0.5 mmol, 1 equiv), **3e** (0.75 mmol, 1.5 equiv), fluorobenzene (2.0 mL), LiIO<sub>4</sub> · 2H<sub>2</sub>O (50 mol %), I<sub>2</sub>O<sub>5</sub> (10 mol %)). <sup>1</sup>H NMR (400 MHz, CDCl<sub>3</sub>) δ 7.85 (d, *J* = 8.3 Hz, 1H), 7.66 (d, *J* = 8.1 Hz, 2H), 7.45 (s, 1H), 7.18-7.09 (m, 10H), 7.05-6.94 (m, 4H), 4.09 (t, *J* = 7.9 Hz, 1H), 3.55-3.50 (m,

1H), 3.37-3.32 (m, 1H), 2.22 (s, 6H); <sup>13</sup>C NMR (100 MHz, CDCl<sub>3</sub>) δ 144.9, 141.7, 136.8, 135.6, 135.1, 132.5, 130.7, 130.4, 129.9, 129.8, 128.7, 127.9, 127.1, 126.9, 124.8, 124.6, 123.6, 123.2, 120.0, 113.8, 42.5, 40.6, 21.6, 21.1; HRMS (ESI) calcd for C<sub>30</sub>H<sub>27</sub>NNaO<sub>2</sub>S<sub>2</sub> [M+Na]: 520.1375, found: 520.1372.

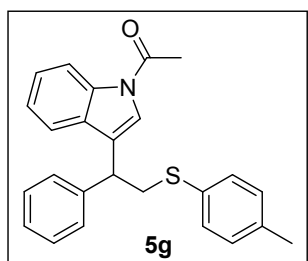

**3-(1-Phenyl-2-(p-tolylthio)ethyl)-1-tosyl-1H-indole (5g):** A white solid, 25.0 mg, 13% yield (**1a** (0.75 mmol, 1.5 equiv), **2a** (0.5 mmol, 1 equiv), **3e** (0.75 mmol, 1.5 equiv), fluorobenzene (2.0 mL), LiIO<sub>4</sub> · 2H<sub>2</sub>O (50 mol %), I<sub>2</sub>O<sub>5</sub> (10 mol %)). <sup>1</sup>H NMR (400 MHz, CDCl<sub>3</sub>) δ 8.30 (s, 1H), 7.22-7.11 (m, 10H), 7.05-6.97 (m, 3H), 4.28 (t, *J* = 7.5 Hz, 1H), 3.56 (dd, *J*<sub>1</sub> = 7.5 Hz, *J*<sub>2</sub> = 13.0 Hz, 1H), 3.38 (dd, *J*<sub>1</sub> = 7.4 Hz, *J*<sub>2</sub> = 13.0 Hz, 1H), 2.48 (s, 3H), 2.21 (s, 3H); <sup>13</sup>C NMR (100 MHz, CDCl<sub>3</sub>) δ 168.5, 141.9, 136.7, 136.1, 132.6, 130.7, 130.0, 129.9, 128.8, 128.0, 127.1, 125.4, 124.3, 123.5, 122.4, 119.5, 116.6, 42.7, 40.6, 24.1, 21.1; HRMS (ESI) calcd for C<sub>25</sub>H<sub>24</sub>NOS [M+H]: 386.1573, found: 386.1574.

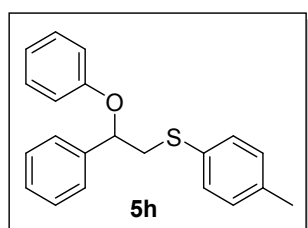

**(2-Phenoxy-2-phenylethyl)(p-tolyl)sulfane (5h):** A yellow oil, 84.8 mg, 53% yield. (**1a** (0.75 mmol, 1.5 equiv), **2a** (0.5 mmol, 1 equiv), **3i** (7.5 mmol, 15 equiv), fluorobenzene (2.0 mL)). <sup>1</sup>H NMR (400 MHz, CDCl<sub>3</sub>) δ 7.29-7.19 (m, 7H), 7.08 (t, *J* = 7.7 Hz, 2H), 7.01 (d, *J* = 7.9 Hz, 2H), 6.79 (t, *J* = 7.3 Hz, 1H), 6.71 (d, *J* = 8.1 Hz, 2H), 5.12 (dd, *J*<sub>1</sub> = 4.9 Hz, *J*<sub>2</sub> = 8.0 Hz, 1H), 3.39 (dd, *J*<sub>1</sub> = 8.1 Hz, *J*<sub>2</sub> = 13.7 Hz, 1H), 3.16 (dd, *J*<sub>1</sub> = 4.9 Hz, *J*<sub>2</sub> = 13.7 Hz, 1H), 2.25 (s, 3H); <sup>13</sup>C NMR (100 MHz, CDCl<sub>3</sub>) δ 157.89, 140.32, 136.60, 132.37, 130.74, 129.78, 129.32, 128.70, 128.11, 126.27,



121.06, 116.09, 79.23, 42.80, 21.09; HRMS (ESI) calcd for C<sub>21</sub>H<sub>20</sub>NaOS [M+Na]: 343.1127, found: 343.1112.

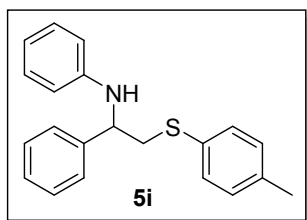

**(2-Phenoxy-2-phenylethyl)(p-tolyl)sulfane (5i):** A yellow oil, 65.3 mg, 41% yield (**1a** (0.75 mmol, 1.5 equiv), **2a** (0.5 mmol, 1 equiv), **3j** (7.5 mmol, 15 equiv), fluorobenzene (2.0 mL)). <sup>1</sup>H NMR (400 MHz, CDCl<sub>3</sub>) δ 7.35-7.21 (m, 7H), 7.06 (dd, *J*<sub>1</sub> = 7.4 Hz, *J*<sub>2</sub> = 14.6 Hz, 4H), 6.65 (t, *J* = 7.3 Hz, 1H), 6.45 (d, *J* = 8.0 Hz, 2H), 4.54 (br, 1H), 4.32 (dd, *J*<sub>1</sub> = 4.3 Hz, *J*<sub>2</sub> = 9.4 Hz, 1H), 3.32 (dd, *J*<sub>1</sub> = 4.4 Hz, *J*<sub>2</sub> = 13.6 Hz, 1H), 3.07 (dd, *J*<sub>1</sub> = 9.4 Hz, *J*<sub>2</sub> = 13.6 Hz, 1H), 2.31 (s, 3H); <sup>13</sup>C NMR (100 MHz, CDCl<sub>3</sub>) δ 147.35, 142.61, 137.27, 131.52, 131.14, 130.01, 129.10, 128.89, 127.58, 126.43, 117.87, 113.89, 57.31, 43.47, 21.18; HRMS (ESI) calcd for C<sub>21</sub>H<sub>22</sub>NS [M+H]: 320.1467, found: 320.1458.

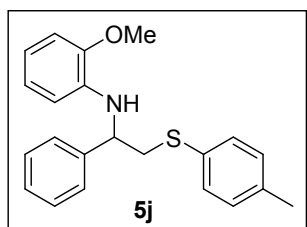

**(2-Phenoxy-2-phenylethyl)(p-tolyl)sulfane (5j):** A yellow oil, 34.9 mg, 20% yield (**1a** (0.75 mmol, 1.5 equiv), **2a** (0.5 mmol, 1 equiv), **3k** (0.75 mmol, 1.5 equiv), fluorobenzene (2.0 mL)). <sup>1</sup>H NMR (400 MHz, CDCl<sub>3</sub>) δ 7.29-7.15 (m, 7H), 7.00 (d, *J* = 7.8 Hz, 2H), 6.70-6.67 (m, 1H), 6.54 (t, *J* = 3.9 Hz, 2H), 6.13-6.11 (m, 1H), 5.11 (br, 1H), 4.28 (dd, *J*<sub>1</sub> = 4.6 Hz, *J*<sub>2</sub> = 9.0 Hz, 1H), 3.80 (s, 3H), 3.26 (dd, *J*<sub>1</sub> = 4.6 Hz, *J*<sub>2</sub> = 13.4 Hz, 1H), 3.16 (dd, *J*<sub>1</sub> = 9.0 Hz, *J*<sub>2</sub> = 13.5 Hz, 1H), 2.24 (s, 3H); <sup>13</sup>C NMR (100 MHz, CDCl<sub>3</sub>) δ 147.13, 142.67, 137.12, 136.94, 131.57, 131.26, 129.86, 128.78, 127.48, 126.46, 121.01, 116.90, 111.36, 109.39, 57.27, 55.57, 43.34, 21.12; HRMS (ESI) calcd for C<sub>22</sub>H<sub>24</sub>NOS [M+H]: 350.1573, found: 350.1567.

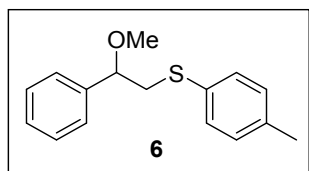

**2-Methoxy-2-phenylethyl-(*p*-tolyl)sulfane (6)<sup>1</sup>:** A yellow oil, 106 mg, 82% yield (**1a** (0.75 mmol, 1.5 equiv), **2a** (0.5 mmol, 1 equiv), methanol (0.75 mmol, 1.5 equiv), fluorobenzene (2.0 mL)). <sup>1</sup>H NMR (400 MHz, CDCl<sub>3</sub>) δ 7.37-7.27 (m, 7H), 7.08 (d, *J* = 7.9 Hz, 2H), 4.26 (dd, *J*<sub>1</sub> = 4.9 Hz, *J*<sub>2</sub> = 8.2 Hz, 1H), 3.27 (dd, *J*<sub>1</sub> = 8.2 Hz, *J*<sub>2</sub> = 13.3 Hz, 1H), 3.23 (s, 3H), 3.08 (dd, *J*<sub>1</sub> = 5.0 Hz, *J*<sub>2</sub> = 13.3 Hz, 1H), 2.31 (s, 3H); <sup>13</sup>C NMR (100 MHz, CDCl<sub>3</sub>) δ 140.6, 136.2, 132.7, 130.2, 129.7, 128.6, 128.1, 126.8, 82.5, 57.1, 42.3, 21.1.

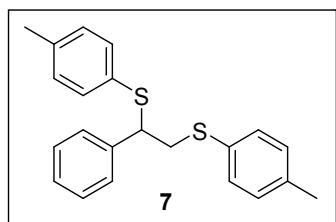

**1-Phenylethane-1,2-diyl-bis(*p*-tolyl)sulfane (7)<sup>3</sup>:** A yellow solid, <sup>1</sup>H NMR (400 MHz, CDCl<sub>3</sub>) δ 7.31-7.21 (m, 5H), 7.16 (d, *J* = 8.0 HZ, 2H), 7.08-7.01 (m, 6H), 4.17 (dd, *J*<sub>1</sub> = 4.9 Hz, *J*<sub>2</sub> = 10.2 Hz, 1H), 4.17 (dd, *J*<sub>1</sub> = 4.9 Hz, *J*<sub>2</sub> = 10.2 Hz, 1H), 3.44 (dd, *J*<sub>1</sub> = 4.9 Hz, *J*<sub>2</sub> = 13.5 Hz, 1H), 3.29 (dd, *J*<sub>1</sub> = 10.2 Hz, *J*<sub>2</sub> = 13.6 Hz, 1H), 2.31 (d, *J* = 2.2 HZ, 6H), <sup>13</sup>C NMR (100 MHz, CDCl<sub>3</sub>) δ 139.8, 137.8, 136.5, 133.4, 131.8, 130.6, 130.4, 129.7, 129.6, 128.5, 128.1, 127.7, 52.6, 40.0, 21.2, 21.1.

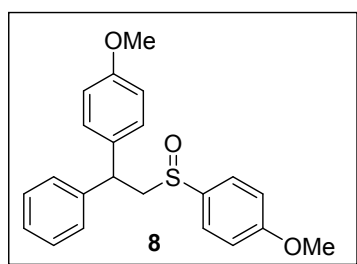

**1-Methoxy-4-((2-(4-methoxyphenyl)-2-phenylethyl)sulfinyl)benzene (8):** A white solid, 146 mg, 80% yield (dr = 50:50, which was determined by <sup>1</sup>H NMR according to the crude reaction). <sup>1</sup>H NMR (400 MHz, CDCl<sub>3</sub>) δ 7.55 (d, *J* = 8.3 Hz, 2H), 7.35-7.18 (m, 6H), 7.14 (d, *J* = 8.3 Hz, 1H), 7.00 (d, *J* = 8.4 Hz, 2H), 6.87 (d, *J* = 8.2 Hz, 1H),

6.81 (d,  $J = 8.2$  Hz, 1H), 4.49-4.40 (m, 1H), 3.84 (s, 3H), 3.77 (d,  $J = 11.6$  Hz, 3H), 3.52-3.46 (m, 1H), 3.36-3.29 (m, 1H);  $^{13}\text{C}$  NMR (100 MHz,  $\text{CDCl}_3$ )  $\delta$  162.1, 162.1, 158.6, 158.4, 142.8, 141.9, 135.2, 135.1, 134.4, 133.5, 129.2, 128.9, 128.7, 128.7, 128.0, 127.6, 127.1, 126.8, 126.1, 126.1, 114.8, 114.1, 114.1, 64.9, 64.8, 55.6, 55.3, 44.8, 44.7; HRMS (ESI) calcd for  $\text{C}_{22}\text{H}_{23}\text{O}_3\text{S}$  [ $\text{M}+\text{H}$ ]: 367.1362, found: 367.1361.

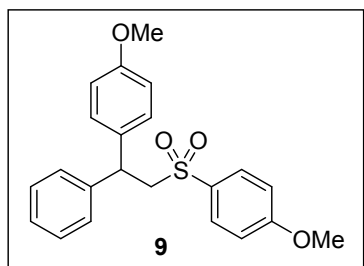

**1-Methoxy-4-((2-(4-methoxyphenyl)-2-phenylethyl)sulfonyl)benzene (9):** A white solid, 174 mg, 91% yield.  $^1\text{H}$  NMR (400 MHz,  $\text{CDCl}_3$ )  $\delta$  7.54 (d,  $J = 8.9$  Hz, 2H), 7.21-7.17 (m, 2H), 7.14-7.10 (m, 3H), 7.02 (d,  $J = 8.7$  Hz, 2H), 6.77 (d,  $J = 8.9$  Hz, 2H), 6.71 (d,  $J = 8.7$  Hz, 2H), 4.55 (t,  $J = 7.2$  Hz, 1H), 3.85 (d,  $J = 7.2$  Hz, 2H), 3.81 (s, 3H), 3.73 (s, 3H);  $^{13}\text{C}$  NMR (100 MHz,  $\text{CDCl}_3$ )  $\delta$  163.3, 158.4, 141.9, 133.46, 131.2, 130.1, 128.7, 128.7, 127.5, 126.8, 114.1, 61.9, 55.6, 55.2, 45.6; HRMS (ESI) calcd for  $\text{C}_{22}\text{H}_{23}\text{O}_4\text{S}$  [ $\text{M}+\text{H}$ ]: 383.1312, found: 383.1305.

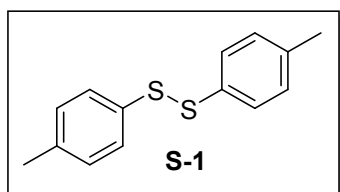

**1,2-di-*p*-Tolyldisulfane (S-1)<sup>2</sup>:** A white solid.  $^1\text{H}$  NMR (400 MHz,  $\text{CDCl}_3$ )  $\delta$  7.37 (d,  $J = 8.2$  Hz, 4H), 7.09 (d,  $J = 8.0$  Hz, 4H), 2.30 (s, 6H);  $^{13}\text{C}$  NMR (100 MHz,  $\text{CDCl}_3$ )  $\delta$  137.5, 133.9, 129.8, 128.6, 21.1.

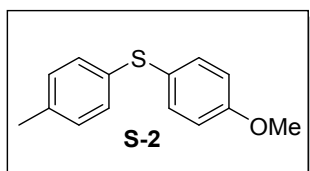

**4-Methoxyphenyl-(*p*-tolyl)sulfane (S-2)<sup>2</sup>:** A yellow oil.  $^1\text{H}$  NMR (400 MHz,  $\text{CDCl}_3$ )  $\delta$  7.38-7.34 (m, 2H), 7.13 (d,  $J = 8.2$  Hz, 2H), 7.06 (d,  $J = 8.0$  Hz, 2H), 6.88-6.84 (m, 2H), 3.80 (s, 3H), 2.29 (s, 3H);  $^{13}\text{C}$  NMR (100 MHz,  $\text{CDCl}_3$ )  $\delta$  159.5, 136.1, 134.4, 129.8, 129.4, 125.6, 114.9, 55.4, 21.0.

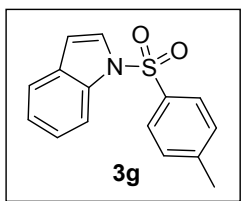

**1-Tosyl-1H-indole (S-2)<sup>4</sup>:** A colorless solid. <sup>1</sup>H NMR (400 MHz, CDCl<sub>3</sub>) δ 8.05 (d, *J* = 8.2 Hz, 1H), 7.80 (d, *J* = 8.5 Hz, 2H), 7.61 (d, *J* = 3.7 Hz, 1H), 7.59 (d, *J* = 7.8 Hz, 1H), 7.35 (t, *J* = 7.6 Hz, 1H), 7.28 (t, *J* = 7.4 Hz, 1H), 7.23 (d, *J* = 8.1 Hz, 2H), 6.69 (d, *J* = 3.1 Hz, 1H), 2.33 (s, 3H); <sup>13</sup>C NMR (100 MHz, CDCl<sub>3</sub>) δ 145.0, 135.3, 134.9, 130.8, 129.9, 126.8, 126.4, 124.6, 123.3, 121.4, 113.6, 109.1, 21.5.

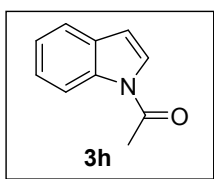

**1-(1H-indol-1-yl)ethan-1-one (3h)<sup>5</sup>:** A pale yellow oil. <sup>1</sup>H NMR (400 MHz, CDCl<sub>3</sub>) δ 8.51 (d, *J* = 8.4 Hz, 1H), 7.61 (d, *J* = 7.5 Hz, 1H), 7.41-7.30 (m, 3H), 6.63 (d, *J* = 3.3 Hz, 1H); <sup>13</sup>C NMR (100 MHz, CDCl<sub>3</sub>) δ 168.8, 135.6, 130.5, 125.4, 125.1, 123.7, 120.9, 116.6, 109.1, 23.9.

The compounds were not attained under the optimal reaction conditions:

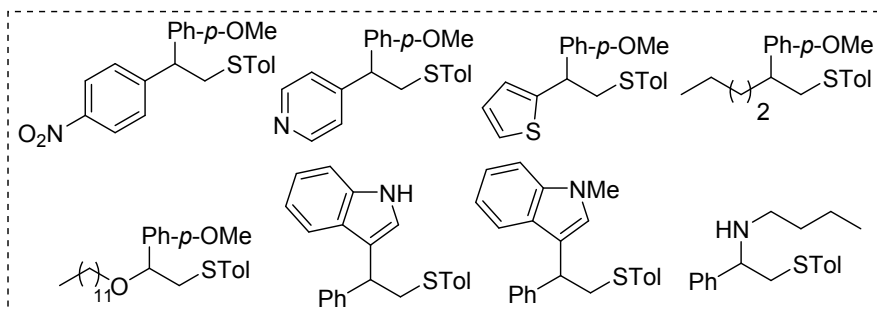

### X-ray crystal structure determination of **5d**:

Diffraction data for the complexes were collected with a Bruker SMART APEX II area detector at low temperature (100 K) with graphite-monochromated Mo K $\alpha$  radiation ( $\lambda = 0.71073 \text{ \AA}$ ). An empirical absorption correction using SADABS<sup>6</sup> was applied for all data. The structure was solved by direct methods using the SHELXS program. All non-hydrogen atoms were refined anisotropically by full-matrix least-squares on  $F^2$  by the use of the program SHELXL<sup>7</sup>. Crystallographic data for the complexes are summarized in Table S6. CCDC 2076131 contain the supplementary crystallographic data for the structures reported in this paper. Copies of the data can be obtained free of charge from The Cambridge Crystallographic Data Centre via [www.ccdc.cam.ac.uk/data\\_request/cif](http://www.ccdc.cam.ac.uk/data_request/cif).

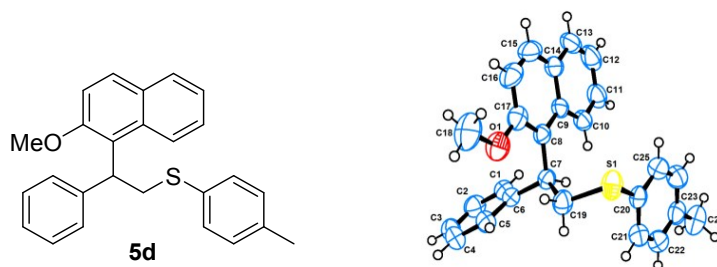

**Figure S3.** The X-ray Diffraction Configuration of **5d**. Thermal ellipsoids are set at 50% probability. Crystal of compound **5d** was grown by slow evaporation of its solution with petroleum ether/ethyl acetate under  $-20 \text{ }^\circ\text{C}$ .

**Table S6.** Crystallographic data for compound **5d**.

|                   |                                       |
|-------------------|---------------------------------------|
| compound          | <b>5d</b>                             |
| formula           | $\text{C}_{26}\text{H}_{24}\text{OS}$ |
| $F_w$             | 384.51                                |
| crystal system    | orthorhombic                          |
| space group       | $P2(1)/c$                             |
| $a / \text{\AA}$  | 7.6661(19)                            |
| $b / \text{\AA}$  | 13.863(3)                             |
| $c / \text{\AA}$  | 19.578(5)                             |
| $\alpha / ^\circ$ | 90                                    |

---

|                                       |                   |
|---------------------------------------|-------------------|
| $\beta / ^\circ$                      | 90                |
| $\gamma / ^\circ$                     | 90                |
| $V / \text{\AA}^3$                    | 2080.7(9)         |
| $Z$                                   | 4                 |
| $D_{\text{calc}} / \text{g cm}^{-3}$  | 1.227             |
| $F(000)$                              | 816               |
| $\mu / \text{mm}^{-1}$                | 0.169             |
| $\theta$ range / $^\circ$             | 1.800~28.965      |
| reflns collected ( $R_{\text{int}}$ ) | 17187<br>(17187)  |
| independent reflns                    | 5153              |
| observed reflns [ $I > 2\sigma(I)$ ]  | 3389              |
| $R_1; wR_2$ [ $I > 2\sigma(I)$ ]      | 0.0442,<br>0.0998 |
| $R_1; wR_2$ (all data)                | 0.0802,<br>0.1155 |
| GOF ( $F^2$ )                         | 1.000             |

---

## 7. Computational details and results

The molecular geometry of each system in solution was fully optimised and harmonic frequencies were subsequently computed along with the thermochemical quantities at  $T = 298.15$  K and  $p = 1.00$  atm. No imaginary frequencies were found for minima and one negative frequency was found for transition states. The calculations were performed at the Density Functional Theory (DFT) level, by using M06-2X<sup>8</sup> hybrid functional coupled with the triple- $\zeta$  6-311++G\*\* basis set for all the elements, except for Iodine, for which the DGDZVP basis set was adopted. The differences in thermochemicals describing the possible reactions were calculated (Table S7).

Solvent effects were taken into account via the implicit polarizable continuum model in its integral equation formalism (IEF-PCM)<sup>9</sup>. Truhlar and coworkers' SMD solvation model<sup>10</sup> was used to build up the cavity and compute the non-electrostatic terms. The solvent used was anisole, and its standard values for dielectric constant and refractive index were always assumed.

The full Natural Bond Orbital (NBO) analysis<sup>11</sup> of the total density was systematically performed at the same level of theory. Natural Atomic Charges were also computed.

For all calculations integration grid for the electronic density was set to 250 radial shells and 974 angular points all the atomic species. Accuracy for the two-electron integrals and their derivatives was set to  $10^{-14}$  a.u. The Self-Consistent Field (SCF) algorithm used was the quadratically convergent procedure designed by Bacskay<sup>12</sup>, a method which is acknowledged to be slower but more reliable than regular SCF with DIIS extrapolation. The convergence criteria for SCF were set to  $10^{-12}$  for root mean square (RMS) change in density matrix and  $10^{-10}$  for maximum change in density matrix. Convergence criteria for geometry optimizations were set to  $2 \times 10^{-6}$  a.u. for maximum force,  $1 \times 10^{-6}$  a.u. for RMS force,  $6 \times 10^{-6}$  a.u. for maximum displacement and  $4 \times 10^{-6}$  a.u. for RMS displacement.

All calculations were performed using GAUSSIAN G16.A03 package<sup>13</sup>.

**Table S7. Differences in thermochemicals computed at  $T = 298.15$  K and  $p = 1.00$  atm, for plausible pathways.**

| Plausible pathways                                                                                                                                                             | $\Delta H / (\text{kJ/mol})$ | $\Delta G / (\text{kJ/mol})$ |
|--------------------------------------------------------------------------------------------------------------------------------------------------------------------------------|------------------------------|------------------------------|
| $2\text{TolSH} + \text{IO}_4^- = 2\text{TolS}^* + \text{IO}_3^- + \text{H}_2\text{O}$                                                                                          | -168.2                       | -208.8                       |
| $2\text{TolS}^* + \text{IO}_4^- + 2\text{H}_3\text{O}^+ = 2\text{TolS}^+ + \text{IO}_3^- + 3\text{H}_2\text{O}$                                                                | -321.3                       | -361.3                       |
| $\text{Ph-CH=CH}_2 + \text{TolS}^* = [\text{Ph-CH-CH}_2\text{-STol}]^*_{(\text{linear})}$                                                                                      | -25.4                        | 25.5                         |
| $\text{Ph-CH=CH}_2 + \text{TolS}^+ = [\text{Ph-CH-CH}_2\text{-STol}]^+_{(\text{cycl})}$                                                                                        | -203.5                       | -142.1                       |
| $[\text{Ph-CH-CH}_2\text{-STol}]^+_{(\text{cycl})} + \text{IO}_3^- + \text{TolSH} = \text{ToI}_2\text{S}_2\text{CHCH}_2\text{Ph} + \text{HIO}_3$                               | -244.4                       | -201.5                       |
| $2[\text{Ph-CH-CH}_2\text{-STol}]^*_{(\text{linear})} + 2\text{H}^+ + \text{IO}_4^- = 2[\text{Ph-CH-CH}_2\text{-STol}]^+_{(\text{cycl})} + \text{IO}_3^- + \text{H}_2\text{O}$ | -677.6                       | -696.6                       |
| $\text{TolS}^* + [\text{Ph-CH-CH}_2\text{-STol}]^*_{(\text{linear})} = \text{ToI}_2\text{S}_2\text{CHCH}_2\text{Ph}$                                                           | -220.1                       | -162.7                       |
| $[\text{Ph-CH-CH}_2\text{-STol}]^+_{(\text{cycl})} + \text{IO}_3^- + \text{AniH} = \text{ToISAniCHCH}_2\text{Ph} + \text{HIO}_3$                                               | -248.7                       | -205.2                       |
| $\text{AniH} + \text{ToI}_2\text{S}_2\text{CHCH}_2\text{Ph} = \text{ToISAniCHCH}_2\text{Ph} + \text{TolSH}$                                                                    | -4.3                         | -3.7                         |

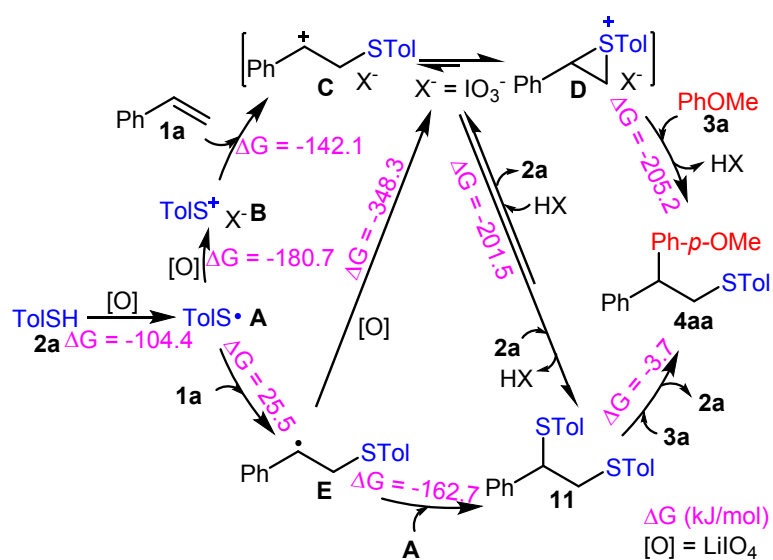



## Cartesian Coordinates of the Optimised Geometries

[Ani]<sup>-</sup>

|   |           |           |           |
|---|-----------|-----------|-----------|
| 6 | -1.221616 | -0.216035 | -0.006976 |
| 6 | -2.460754 | -0.855752 | -0.027298 |
| 6 | -3.633257 | -0.098268 | 0.013813  |
| 6 | -3.689945 | 1.317421  | 0.076860  |
| 6 | -2.401158 | 1.886238  | 0.093722  |
| 6 | -1.188209 | 1.173351  | 0.054324  |
| 1 | -2.482181 | -1.941582 | -0.075236 |
| 1 | -4.564202 | -0.668267 | -0.005412 |
| 1 | -2.298397 | 2.972475  | 0.141152  |
| 1 | -0.245656 | 1.709953  | 0.071996  |
| 6 | 1.147833  | -0.389529 | -0.029957 |
| 1 | 1.292274  | 0.190256  | 0.888385  |
| 1 | 1.893682  | -1.183040 | -0.069906 |
| 1 | 1.280760  | 0.269229  | -0.895251 |
| 8 | -0.110123 | -1.024789 | -0.049963 |

AniH

|   |           |           |           |
|---|-----------|-----------|-----------|
| 6 | -1.223045 | -0.205879 | -0.017042 |
| 6 | -2.460675 | -0.857686 | -0.046363 |
| 6 | -3.633041 | -0.119975 | -0.026706 |
| 6 | -3.593150 | 1.274691  | 0.022317  |
| 6 | -2.362409 | 1.915366  | 0.051211  |
| 6 | -1.171614 | 1.187317  | 0.031990  |
| 1 | -2.475588 | -1.940701 | -0.084347 |
| 1 | -4.586541 | -0.635557 | -0.049765 |
| 1 | -4.511451 | 1.849026  | 0.037591  |
| 1 | -2.314438 | 2.997879  | 0.089351  |
| 1 | -0.225323 | 1.711383  | 0.055307  |
| 6 | 1.144578  | -0.389479 | -0.011018 |
| 1 | 1.281592  | 0.192029  | 0.905530  |
| 1 | 1.872694  | -1.197835 | -0.035479 |
| 1 | 1.291000  | 0.254630  | -0.883182 |
| 8 | -0.129970 | -1.008789 | -0.039397 |

[Ani]<sup>+</sup>

|   |           |           |           |
|---|-----------|-----------|-----------|
| 6 | -1.229646 | -0.207047 | -0.006526 |
| 6 | -2.467913 | -0.873678 | -0.028045 |
| 6 | -3.691190 | -0.174780 | 0.010799  |
| 6 | -3.338328 | 1.101633  | 0.065034  |

|   |           |           |           |
|---|-----------|-----------|-----------|
| 6 | -2.357663 | 1.980231  | 0.097602  |
| 6 | -1.174399 | 1.191303  | 0.055031  |
| 1 | -2.512515 | -1.956423 | -0.075697 |
| 1 | -4.668801 | -0.639359 | -0.003458 |
| 1 | -2.371987 | 3.060701  | 0.145534  |
| 1 | -0.241963 | 1.742327  | 0.073407  |
| 6 | 1.134910  | -0.372774 | -0.029132 |
| 1 | 1.273926  | 0.194579  | 0.894715  |
| 1 | 1.854056  | -1.186404 | -0.069800 |
| 1 | 1.262331  | 0.274083  | -0.900939 |
| 8 | -0.151764 | -0.992731 | -0.048273 |

[Ani]<sup>•</sup>

|   |           |           |           |
|---|-----------|-----------|-----------|
| 6 | -1.232188 | -0.203567 | -0.007075 |
| 6 | -2.465785 | -0.866757 | -0.030041 |
| 6 | -3.651712 | -0.141247 | 0.010623  |
| 6 | -3.551278 | 1.231421  | 0.073194  |
| 6 | -2.371434 | 1.926050  | 0.097940  |
| 6 | -1.178624 | 1.189984  | 0.056745  |
| 1 | -2.473599 | -1.949651 | -0.079840 |
| 1 | -4.608667 | -0.650670 | -0.006961 |
| 1 | -2.338890 | 3.008696  | 0.147576  |
| 1 | -0.232309 | 1.714721  | 0.075101  |
| 6 | 1.137172  | -0.382838 | -0.029854 |
| 1 | 1.284092  | 0.188572  | 0.891652  |
| 1 | 1.865793  | -1.190103 | -0.071484 |
| 1 | 1.273127  | 0.270897  | -0.896696 |
| 8 | -0.136645 | -1.003850 | -0.050630 |

HIO<sub>3</sub>

|    |           |           |           |
|----|-----------|-----------|-----------|
| 53 | -0.034625 | -0.059213 | 0.283115  |
| 8  | 1.517541  | -0.387266 | 1.177762  |
| 8  | 0.582858  | 1.328993  | -0.982219 |
| 8  | -0.288711 | -1.452176 | -0.861842 |
| 1  | 1.360490  | 0.992172  | -1.459939 |

LiIO<sub>3</sub>

|    |           |           |           |
|----|-----------|-----------|-----------|
| 53 | -0.216686 | -0.068577 | 0.125224  |
| 8  | 1.572436  | -0.133367 | 0.688393  |
| 8  | 0.225355  | 1.175513  | -1.208626 |
| 8  | -0.521655 | -1.646202 | -0.746726 |

|                                 |    |           |           |           |
|---------------------------------|----|-----------|-----------|-----------|
|                                 | 3  | 2.078103  | 1.095144  | -0.701389 |
| [IO <sub>3</sub> ] <sup>-</sup> |    |           |           |           |
|                                 | 53 | 0.000462  | -0.000681 | -0.231558 |
|                                 | 8  | -1.624894 | 0.487764  | 0.511985  |
|                                 | 8  | 1.234737  | 1.164938  | 0.511371  |
|                                 | 8  | 0.390616  | -1.653215 | 0.511178  |
| HIO <sub>4</sub>                |    |           |           |           |
|                                 | 53 | 0.071839  | -0.023406 | -0.137014 |
|                                 | 8  | 0.263164  | -0.200843 | 1.785994  |
|                                 | 8  | -0.050392 | -1.768194 | -0.558504 |
|                                 | 8  | -1.432579 | 0.951561  | -0.339559 |
|                                 | 8  | 1.583872  | 0.818367  | -0.647627 |
|                                 | 1  | 0.347932  | 0.675061  | 2.206710  |
| LiIO <sub>4</sub>               |    |           |           |           |
|                                 | 53 | 0.043666  | -0.069716 | 0.000046  |
|                                 | 8  | -0.651666 | 1.632546  | -0.102457 |
|                                 | 8  | -1.375195 | -1.194199 | 0.074409  |
|                                 | 8  | 1.049097  | -0.310124 | -1.492194 |
|                                 | 8  | 1.051947  | -0.120218 | 1.508523  |
|                                 | 3  | -0.146129 | 3.328557  | -0.181273 |
| [IO <sub>4</sub> ] <sup>-</sup> |    |           |           |           |
|                                 | 53 | 0.000000  | 0.000000  | 0.000000  |
|                                 | 8  | 0.000000  | 0.000000  | 1.825018  |
|                                 | 8  | 0.000000  | -1.720643 | -0.608339 |
|                                 | 8  | -1.490121 | 0.860322  | -0.608339 |
|                                 | 8  | 1.490121  | 0.860322  | -0.608339 |
| MeOH                            |    |           |           |           |
|                                 | 6  | 0.000145  | 0.016899  | 0.014459  |
|                                 | 1  | -0.000210 | -1.017271 | -0.329120 |
|                                 | 1  | -0.891247 | 0.514537  | -0.380880 |
|                                 | 1  | 0.891493  | 0.514128  | -0.381494 |
|                                 | 8  | 0.000626  | -0.014479 | 1.433121  |
|                                 | 1  | 0.000948  | 0.891120  | 1.754369  |

[MeOPhCHPhCH<sub>2</sub>STol]<sup>+</sup>

|    |           |           |           |
|----|-----------|-----------|-----------|
| 6  | 1.365291  | 0.370118  | -0.234969 |
| 6  | 0.390101  | 1.379324  | 0.049425  |
| 6  | -0.891952 | 1.048617  | 0.579271  |
| 6  | -1.186978 | -0.242549 | 0.833866  |
| 6  | -0.277911 | -1.353361 | 0.477431  |
| 6  | 1.043040  | -0.923894 | -0.018275 |
| 1  | 2.337726  | 0.643693  | -0.620836 |
| 1  | -1.576839 | 1.857499  | 0.799068  |
| 1  | -2.151851 | -0.504958 | 1.257825  |
| 1  | 1.766325  | -1.702245 | -0.244829 |
| 8  | 0.599935  | 2.641187  | -0.145580 |
| 6  | 1.858519  | 3.119400  | -0.669784 |
| 1  | 2.036528  | 2.689370  | -1.655147 |
| 1  | 1.740739  | 4.195975  | -0.744357 |
| 1  | 2.663991  | 2.875213  | 0.022499  |
| 1  | -0.769284 | -1.803229 | -0.411475 |
| 6  | -0.212079 | -2.531158 | 1.508782  |
| 1  | -1.237907 | -2.676612 | 1.862736  |
| 6  | 0.676288  | -2.211992 | 2.710250  |
| 1  | 0.715554  | -3.081722 | 3.368045  |
| 1  | 1.693425  | -1.961951 | 2.403285  |
| 6  | 0.208058  | -3.814290 | 0.808126  |
| 6  | 1.521091  | -4.285849 | 0.817250  |
| 6  | -0.760551 | -4.538388 | 0.107521  |
| 6  | 1.857400  | -5.454290 | 0.135514  |
| 1  | 2.294021  | -3.756418 | 1.363294  |
| 6  | -0.427557 | -5.703268 | -0.572503 |
| 1  | -1.789049 | -4.189208 | 0.105042  |
| 6  | 0.886901  | -6.164109 | -0.561388 |
| 1  | 2.880693  | -5.810763 | 0.156725  |
| 1  | -1.194582 | -6.255577 | -1.102890 |
| 1  | 1.148993  | -7.075129 | -1.086330 |
| 16 | 0.017285  | -0.797808 | 3.667429  |
| 6  | 1.298920  | -0.680069 | 4.907586  |
| 6  | 2.494192  | -0.016377 | 4.627402  |
| 6  | 1.104119  | -1.244404 | 6.166366  |
| 6  | 3.485770  | 0.067664  | 5.596944  |
| 1  | 2.644122  | 0.434483  | 3.652102  |
| 6  | 2.101058  | -1.147731 | 7.132256  |
| 1  | 0.176880  | -1.759590 | 6.389276  |
| 6  | 3.303993  | -0.493004 | 6.864755  |
| 1  | 4.413443  | 0.583333  | 5.370296  |

|   |          |           |          |
|---|----------|-----------|----------|
| 1 | 1.940118 | -1.590958 | 8.109372 |
| 6 | 4.367827 | -0.366181 | 7.921116 |
| 1 | 5.366451 | -0.436229 | 7.486002 |
| 1 | 4.294535 | 0.602696  | 8.423713 |
| 1 | 4.264477 | -1.142990 | 8.680150 |

[MeOPhCHPhCH<sub>2</sub>STol]<sup>+</sup> - TS

|    |           |           |           |
|----|-----------|-----------|-----------|
| 6  | 1.324881  | 0.766712  | 1.289079  |
| 6  | 0.275728  | 1.406594  | 0.574926  |
| 6  | -0.737476 | 0.650939  | -0.098788 |
| 6  | -0.685771 | -0.693884 | -0.075450 |
| 6  | 0.393604  | -1.445086 | 0.602457  |
| 6  | 1.329831  | -0.588185 | 1.360336  |
| 1  | 2.079808  | 1.344551  | 1.804251  |
| 1  | -1.523216 | 1.195574  | -0.607319 |
| 1  | -1.442487 | -1.276282 | -0.592643 |
| 1  | 2.122270  | -1.073577 | 1.922625  |
| 8  | 0.149826  | 2.693886  | 0.487375  |
| 6  | 1.095959  | 3.573403  | 1.130660  |
| 1  | 2.091102  | 3.415219  | 0.714340  |
| 1  | 0.749144  | 4.577237  | 0.904957  |
| 1  | 1.086549  | 3.403690  | 2.207545  |
| 1  | 1.033771  | -1.802976 | -0.231723 |
| 6  | -0.139772 | -2.743294 | 1.314512  |
| 1  | -1.229437 | -2.662771 | 1.329251  |
| 6  | 0.320781  | -2.873181 | 2.772165  |
| 1  | -0.087985 | -3.796515 | 3.183090  |
| 1  | 1.407352  | -2.922398 | 2.850301  |
| 6  | 0.218014  | -4.006828 | 0.554613  |
| 6  | 1.555177  | -4.323550 | 0.296736  |
| 6  | -0.778342 | -4.887023 | 0.137536  |
| 6  | 1.887382  | -5.495707 | -0.371046 |
| 1  | 2.342910  | -3.646937 | 0.619746  |
| 6  | -0.447302 | -6.062904 | -0.533161 |
| 1  | -1.819262 | -4.654612 | 0.339174  |
| 6  | 0.884279  | -6.368677 | -0.788645 |
| 1  | 2.927363  | -5.730690 | -0.565607 |
| 1  | -1.231933 | -6.737507 | -0.855592 |
| 1  | 1.142775  | -7.282570 | -1.310388 |
| 16 | -0.276288 | -1.457287 | 3.765584  |
| 6  | 1.182344  | -0.975319 | 4.669718  |
| 6  | 2.051745  | -1.908247 | 5.231123  |
| 6  | 1.423994  | 0.387709  | 4.853974  |

|   |          |           |          |
|---|----------|-----------|----------|
| 6 | 3.170237 | -1.475763 | 5.938028 |
| 1 | 1.854108 | -2.969897 | 5.132939 |
| 6 | 2.531876 | 0.804441  | 5.581527 |
| 1 | 0.741310 | 1.117852  | 4.431938 |
| 6 | 3.431184 | -0.117929 | 6.124507 |
| 1 | 3.841997 | -2.211876 | 6.367005 |
| 1 | 2.706178 | 1.866283  | 5.726137 |
| 6 | 4.644904 | 0.350269  | 6.881168 |
| 1 | 5.155835 | -0.484776 | 7.361966 |
| 1 | 5.355719 | 0.839963  | 6.209690 |
| 1 | 4.370602 | 1.074200  | 7.651739 |

PhTolSCHCH<sub>2</sub>Ani

|    |           |           |           |
|----|-----------|-----------|-----------|
| 6  | -1.848432 | 2.594913  | 0.105006  |
| 1  | -2.300479 | 2.193942  | -0.807796 |
| 1  | -2.204220 | 1.981486  | 0.936753  |
| 6  | -2.332480 | 4.048823  | 0.261886  |
| 1  | -1.815120 | 4.666760  | -0.473749 |
| 6  | -3.819272 | 4.233750  | 0.090623  |
| 6  | -4.737923 | 3.326492  | 0.624769  |
| 6  | -4.299223 | 5.351863  | -0.594613 |
| 6  | -6.105284 | 3.533803  | 0.475289  |
| 1  | -4.387070 | 2.455593  | 1.168313  |
| 6  | -5.666626 | 5.560109  | -0.745839 |
| 1  | -3.592793 | 6.063212  | -1.011967 |
| 6  | -6.574570 | 4.651100  | -0.210760 |
| 1  | -6.806281 | 2.821396  | 0.895592  |
| 1  | -6.022129 | 6.431673  | -1.283985 |
| 1  | -7.640282 | 4.811258  | -0.327466 |
| 16 | -1.794852 | 4.734329  | 1.906691  |
| 6  | -0.772312 | 6.105507  | 1.393732  |
| 6  | 0.527188  | 5.886423  | 0.927617  |
| 6  | -1.260012 | 7.408888  | 1.471457  |
| 6  | 1.315119  | 6.960739  | 0.534155  |
| 1  | 0.917454  | 4.874354  | 0.876010  |
| 6  | -0.457534 | 8.478524  | 1.082704  |
| 1  | -2.269953 | 7.584107  | 1.824474  |
| 6  | 0.837945  | 8.273339  | 0.607777  |
| 1  | 2.320650  | 6.777693  | 0.168012  |
| 1  | -0.849423 | 9.488896  | 1.144751  |
| 6  | 1.710764  | 9.433776  | 0.211653  |
| 1  | 1.111609  | 10.282749 | -0.121749 |
| 1  | 2.315670  | 9.768202  | 1.059757  |

|   |           |          |           |
|---|-----------|----------|-----------|
| 1 | 2.394928  | 9.156556 | -0.592165 |
| 6 | -0.346511 | 2.519025 | 0.006131  |
| 6 | 0.443011  | 2.117848 | 1.077570  |
| 6 | 0.300036  | 2.932504 | -1.165260 |
| 6 | 1.837647  | 2.129061 | 1.005870  |
| 1 | -0.031396 | 1.796051 | 1.998620  |
| 6 | 1.680967  | 2.955935 | -1.256303 |
| 1 | -0.292822 | 3.248477 | -2.018969 |
| 6 | 2.461455  | 2.558457 | -0.164779 |
| 1 | 2.414712  | 1.808273 | 1.862952  |
| 1 | 2.179757  | 3.276009 | -2.163903 |
| 8 | 3.806428  | 2.615384 | -0.342519 |
| 6 | 4.632125  | 2.234237 | 0.744158  |
| 1 | 5.657132  | 2.355700 | 0.399701  |
| 1 | 4.464750  | 2.876768 | 1.613785  |
| 1 | 4.465824  | 1.189225 | 1.022030  |

Sty

|   |           |           |          |
|---|-----------|-----------|----------|
| 6 | -1.001482 | -0.422552 | 0.000000 |
| 6 | 0.000274  | 0.557327  | 0.000000 |
| 6 | 1.336002  | 0.141908  | 0.000000 |
| 6 | 1.667441  | -1.209678 | 0.000000 |
| 6 | 0.663326  | -2.171387 | 0.000000 |
| 6 | -0.672556 | -1.770974 | 0.000000 |
| 1 | -2.045776 | -0.131870 | 0.000000 |
| 1 | 2.122093  | 0.890338  | 0.000000 |
| 1 | 2.709242  | -1.509267 | 0.000000 |
| 1 | 0.915766  | -3.225441 | 0.000000 |
| 1 | -1.460495 | -2.515717 | 0.000000 |
| 6 | -0.294059 | 2.003341  | 0.000000 |
| 1 | 0.583593  | 2.645567  | 0.000000 |
| 6 | -1.499412 | 2.571608  | 0.000000 |
| 1 | -2.419597 | 1.997145  | 0.000000 |
| 1 | -1.599073 | 3.650796  | 0.000000 |

TEMPOH

|   |           |           |           |
|---|-----------|-----------|-----------|
| 6 | -1.276553 | 0.080036  | -0.058156 |
| 6 | 1.287476  | 0.079812  | -0.057810 |
| 6 | 1.250589  | -1.380636 | -0.530970 |
| 6 | 0.005269  | -2.126730 | -0.062673 |
| 6 | -1.239794 | -1.380419 | -0.531305 |
| 1 | 1.277246  | -1.387872 | -1.626730 |

|   |           |           |           |
|---|-----------|-----------|-----------|
| 1 | 2.161308  | -1.874619 | -0.178923 |
| 1 | 0.005235  | -3.141464 | -0.469573 |
| 1 | 0.005114  | -2.229218 | 1.026812  |
| 1 | -1.266156 | -1.387650 | -1.627072 |
| 1 | -2.150694 | -1.874243 | -0.179504 |
| 6 | 2.398250  | 0.812711  | -0.816505 |
| 1 | 2.531809  | 1.827455  | -0.436050 |
| 1 | 3.344527  | 0.278702  | -0.696075 |
| 1 | 2.161162  | 0.863874  | -1.882266 |
| 6 | 1.592795  | 0.169171  | 1.446407  |
| 1 | 2.653420  | -0.040996 | 1.609960  |
| 1 | 1.387250  | 1.175248  | 1.816961  |
| 1 | 1.022698  | -0.543937 | 2.040477  |
| 6 | -1.582261 | 0.169448  | 1.445980  |
| 1 | -1.376639 | 1.175490  | 1.816590  |
| 1 | -2.642967 | -0.040533 | 1.609247  |
| 1 | -1.012450 | -0.543760 | 2.040203  |
| 6 | -2.386994 | 0.813130  | -0.817149 |
| 1 | -3.333397 | 0.279286  | -0.696974 |
| 1 | -2.520479 | 1.827896  | -0.436730 |
| 1 | -2.149610 | 0.864251  | -1.882847 |
| 7 | 0.005572  | 0.706089  | -0.470047 |
| 8 | 0.005627  | 2.053755  | -0.001401 |
| 1 | 0.005781  | 2.577959  | -0.808625 |

TEMPO

|   |           |           |           |
|---|-----------|-----------|-----------|
| 6 | 1.315309  | 0.674382  | -0.265589 |
| 6 | -1.320936 | 0.641166  | -0.269231 |
| 6 | -1.225523 | -0.822116 | 0.177686  |
| 6 | 0.022306  | -1.526882 | -0.340831 |
| 6 | 1.254373  | -0.793271 | 0.174271  |
| 1 | -1.218393 | -0.853955 | 1.273359  |
| 1 | -2.135155 | -1.330749 | -0.154749 |
| 1 | 0.034966  | -2.562206 | 0.008430  |
| 1 | 0.022244  | -1.564962 | -1.434776 |
| 1 | 1.251283  | -0.828848 | 1.269821  |
| 1 | 2.174634  | -1.279550 | -0.162003 |
| 6 | -2.364312 | 1.367906  | 0.578289  |
| 1 | -2.536002 | 2.379521  | 0.211169  |
| 1 | -3.304854 | 0.812963  | 0.536702  |
| 1 | -2.039198 | 1.426219  | 1.619662  |
| 6 | -1.707027 | 0.747405  | -1.750737 |
| 1 | -2.756390 | 0.465904  | -1.871331 |



|   |           |          |           |
|---|-----------|----------|-----------|
| 1 | -1.585057 | 1.776809 | -2.094720 |
| 1 | -1.109656 | 0.091093 | -2.384931 |
| 6 | 1.702856  | 0.806070 | -1.744218 |
| 1 | 1.610225  | 1.847644 | -2.059353 |
| 1 | 2.742992  | 0.496275 | -1.875144 |
| 1 | 1.082778  | 0.189682 | -2.396102 |
| 6 | 2.338397  | 1.418029 | 0.592055  |
| 1 | 3.293748  | 0.889437 | 0.543336  |
| 1 | 2.482547  | 2.438977 | 0.239524  |
| 1 | 2.011910  | 1.452165 | 1.634102  |
| 7 | -0.011282 | 1.325761 | -0.046657 |
| 8 | -0.026784 | 2.595577 | -0.115115 |

Tol<sub>2</sub>S<sub>2</sub>CHCH<sub>2</sub>Ph

|    |           |           |           |
|----|-----------|-----------|-----------|
| 6  | 0.040519  | -0.042788 | 0.202989  |
| 6  | 1.141647  | -0.818186 | -0.178867 |
| 6  | 0.991595  | -2.174680 | -0.422137 |
| 6  | -0.253839 | -2.801588 | -0.306041 |
| 6  | -1.340775 | -2.018684 | 0.073540  |
| 6  | -1.203753 | -0.655511 | 0.334059  |
| 1  | 2.115908  | -0.354082 | -0.290784 |
| 1  | 1.857528  | -2.758818 | -0.718658 |
| 1  | -2.319251 | -2.477024 | 0.176440  |
| 1  | -2.073636 | -0.089777 | 0.643513  |
| 16 | 0.345357  | 1.677168  | 0.537340  |
| 6  | -0.399339 | -4.273614 | -0.586096 |
| 1  | -0.125105 | -4.505239 | -1.618730 |
| 1  | 0.252089  | -4.862269 | 0.065048  |
| 1  | -1.426479 | -4.604961 | -0.426721 |
| 6  | -1.333059 | 2.385236  | 0.425749  |
| 1  | -1.820064 | 1.973460  | -0.460858 |
| 1  | -1.910657 | 2.111348  | 1.310362  |
| 6  | -1.263068 | 3.903369  | 0.272622  |
| 1  | -0.631161 | 4.145795  | -0.584212 |
| 6  | -2.628014 | 4.510996  | 0.062209  |
| 6  | -3.664302 | 4.310079  | 0.978277  |
| 6  | -2.854699 | 5.324637  | -1.047138 |
| 6  | -4.905337 | 4.902230  | 0.778538  |
| 1  | -3.493424 | 3.706539  | 1.863672  |
| 6  | -4.097155 | 5.922479  | -1.246599 |
| 1  | -2.049606 | 5.498928  | -1.753994 |
| 6  | -5.125320 | 5.711578  | -0.335072 |
| 1  | -5.701706 | 4.738158  | 1.495715  |

|    |           |           |           |
|----|-----------|-----------|-----------|
| 1  | -4.257369 | 6.555656  | -2.111761 |
| 1  | -6.092791 | 6.176278  | -0.486746 |
| 16 | -0.429997 | 4.624782  | 1.764096  |
| 6  | -0.529845 | 6.348667  | 1.310452  |
| 6  | 0.401601  | 6.898142  | 0.429306  |
| 6  | -1.557162 | 7.148475  | 1.809446  |
| 6  | 0.296466  | 8.230762  | 0.047179  |
| 1  | 1.204866  | 6.280511  | 0.042480  |
| 6  | -1.649714 | 8.482356  | 1.425986  |
| 1  | -2.289234 | 6.722285  | 2.485928  |
| 6  | -0.727261 | 9.043606  | 0.540842  |
| 1  | 1.023565  | 8.647920  | -0.642370 |
| 1  | -2.456201 | 9.094909  | 1.815955  |
| 6  | -0.811562 | 10.495420 | 0.152689  |
| 1  | -1.835099 | 10.865967 | 0.229772  |
| 1  | -0.186174 | 11.105287 | 0.811529  |
| 1  | -0.462511 | 10.650797 | -0.869776 |

TolSAniCHCH<sub>2</sub>Ph

|    |           |           |           |
|----|-----------|-----------|-----------|
| 6  | -0.038655 | 0.302315  | 0.125176  |
| 6  | 1.156026  | -0.252483 | -0.345194 |
| 6  | 1.280248  | -1.626579 | -0.493652 |
| 6  | 0.222077  | -2.489073 | -0.192688 |
| 6  | -0.962968 | -1.923609 | 0.273983  |
| 6  | -1.099018 | -0.546961 | 0.439040  |
| 1  | 1.988738  | 0.395491  | -0.597664 |
| 1  | 2.216445  | -2.037727 | -0.858348 |
| 1  | -1.799505 | -2.568737 | 0.523599  |
| 1  | -2.031487 | -0.150875 | 0.821372  |
| 16 | -0.087040 | 2.066122  | 0.339864  |
| 6  | 0.355181  | -3.975257 | -0.394163 |
| 1  | 0.176848  | -4.243252 | -1.439855 |
| 1  | 1.357937  | -4.320123 | -0.133729 |
| 1  | -0.365764 | -4.521849 | 0.216093  |
| 6  | -1.879240 | 2.399692  | 0.358152  |
| 1  | -2.335747 | 1.865331  | -0.477904 |
| 1  | -2.302509 | 2.034658  | 1.296036  |
| 6  | -2.108027 | 3.908349  | 0.215390  |
| 1  | -1.594026 | 4.234808  | -0.694608 |
| 6  | -3.580395 | 4.261520  | 0.043522  |
| 6  | -4.621389 | 3.381488  | 0.335832  |
| 6  | -3.899594 | 5.546528  | -0.408069 |
| 6  | -5.950770 | 3.777295  | 0.182276  |

|   |           |          |           |
|---|-----------|----------|-----------|
| 1 | -4.411769 | 2.376366 | 0.684081  |
| 6 | -5.220842 | 5.942029 | -0.565265 |
| 1 | -3.096136 | 6.241916 | -0.632284 |
| 6 | -6.255133 | 5.055447 | -0.267928 |
| 1 | -6.747199 | 3.079425 | 0.415030  |
| 1 | -5.445761 | 6.941578 | -0.919769 |
| 1 | -7.287842 | 5.361724 | -0.388360 |
| 6 | -1.501532 | 4.675478 | 1.380319  |
| 6 | -2.021078 | 4.534796 | 2.673672  |
| 6 | -0.412959 | 5.517073 | 1.198835  |
| 6 | -1.464157 | 5.208248 | 3.744990  |
| 1 | -2.881447 | 3.892994 | 2.839817  |
| 6 | 0.164518  | 6.210167 | 2.267084  |
| 1 | 0.008506  | 5.639816 | 0.205825  |
| 6 | -0.362892 | 6.054117 | 3.550531  |
| 1 | -1.866553 | 5.101519 | 4.745602  |
| 1 | 1.011728  | 6.855661 | 2.082405  |
| 8 | 0.111247  | 6.676232 | 4.667886  |
| 6 | 1.217091  | 7.553119 | 4.530680  |
| 1 | 1.422520  | 7.938935 | 5.527407  |
| 1 | 2.099619  | 7.023610 | 4.159851  |
| 1 | 0.980513  | 8.387007 | 3.863166  |

TolSAniCHCH<sub>2</sub>Ph

|    |           |           |           |
|----|-----------|-----------|-----------|
| 6  | -3.042355 | -0.527293 | -0.347303 |
| 6  | -3.948804 | -1.451903 | -0.882107 |
| 6  | -5.292463 | -1.389299 | -0.549955 |
| 6  | -5.783586 | -0.406345 | 0.317081  |
| 6  | -4.873314 | 0.506349  | 0.841215  |
| 6  | -3.516020 | 0.452648  | 0.522062  |
| 1  | -3.596778 | -2.220703 | -1.562165 |
| 1  | -5.978124 | -2.115576 | -0.975882 |
| 1  | -5.222578 | 1.279137  | 1.518572  |
| 1  | -2.845084 | 1.178532  | 0.962968  |
| 16 | -1.339795 | -0.719290 | -0.816041 |
| 6  | -7.248224 | -0.350936 | 0.661461  |
| 1  | -7.855740 | -0.197559 | -0.234388 |
| 1  | -7.577735 | -1.285193 | 1.123447  |
| 1  | -7.458899 | 0.463467  | 1.356206  |
| 6  | -0.576910 | 0.803279  | -0.172515 |
| 1  | -1.170797 | 1.657749  | -0.503949 |
| 1  | -0.573475 | 0.765113  | 0.919112  |
| 6  | 0.851360  | 0.914022  | -0.718070 |

|   |          |           |           |
|---|----------|-----------|-----------|
| 1 | 0.789070 | 0.878445  | -1.810748 |
| 6 | 1.512751 | 2.238185  | -0.354642 |
| 6 | 1.024462 | 3.097673  | 0.628357  |
| 6 | 2.686654 | 2.592765  | -1.028043 |
| 6 | 1.694979 | 4.283198  | 0.932712  |
| 1 | 0.115742 | 2.857475  | 1.168726  |
| 6 | 3.353709 | 3.773022  | -0.730337 |
| 1 | 3.079438 | 1.926711  | -1.790573 |
| 6 | 2.858877 | 4.624894  | 0.256461  |
| 1 | 1.300785 | 4.938680  | 1.701111  |
| 1 | 4.260098 | 4.029962  | -1.266835 |
| 1 | 3.378396 | 5.546402  | 0.492536  |
| 6 | 1.712260 | -0.258320 | -0.274389 |
| 6 | 2.055700 | -0.420692 | 1.073606  |
| 6 | 2.163992 | -1.204219 | -1.184522 |
| 6 | 2.816956 | -1.496058 | 1.491330  |
| 1 | 1.728018 | 0.313362  | 1.804034  |
| 6 | 2.937221 | -2.296668 | -0.782916 |
| 1 | 1.908906 | -1.100914 | -2.234753 |
| 6 | 3.263210 | -2.444344 | 0.562531  |
| 1 | 3.085602 | -1.623145 | 2.533531  |
| 1 | 3.270044 | -3.011984 | -1.523329 |
| 8 | 4.006212 | -3.462715 | 1.064718  |
| 6 | 4.488892 | -4.434401 | 0.153754  |
| 1 | 5.057666 | -5.148334 | 0.746301  |
| 1 | 3.665367 | -4.954846 | -0.344456 |
| 1 | 5.146050 | -3.982723 | -0.595567 |

TolSAni

|    |           |           |           |
|----|-----------|-----------|-----------|
| 6  | -0.028490 | 0.339061  | 0.087387  |
| 6  | 1.217494  | -0.259651 | -0.114905 |
| 6  | 1.323770  | -1.642063 | -0.187043 |
| 6  | 0.199773  | -2.463951 | -0.068315 |
| 6  | -1.035321 | -1.849835 | 0.134752  |
| 6  | -1.158632 | -0.464827 | 0.215542  |
| 1  | 2.105565  | 0.355656  | -0.216496 |
| 1  | 2.299929  | -2.090844 | -0.342178 |
| 1  | -1.925361 | -2.463030 | 0.236334  |
| 1  | -2.133946 | -0.021957 | 0.379077  |
| 16 | -0.054270 | 2.122758  | 0.203313  |
| 6  | 0.318244  | -3.960061 | -0.188945 |
| 1  | 0.283887  | -4.268158 | -1.238299 |
| 1  | 1.262209  | -4.315961 | 0.228371  |

|   |           |           |           |
|---|-----------|-----------|-----------|
| 1 | -0.498712 | -4.463464 | 0.330989  |
| 6 | -1.796349 | 2.488742  | 0.166118  |
| 6 | -2.481189 | 2.752537  | 1.346311  |
| 6 | -2.486733 | 2.532503  | -1.050815 |
| 6 | -3.841536 | 3.058232  | 1.331029  |
| 1 | -1.953651 | 2.717703  | 2.292575  |
| 6 | -3.837020 | 2.827331  | -1.077646 |
| 1 | -1.958948 | 2.330441  | -1.975966 |
| 6 | -4.523509 | 3.092465  | 0.114476  |
| 1 | -4.347705 | 3.260295  | 2.265312  |
| 1 | -4.383718 | 2.863256  | -2.012536 |
| 8 | -5.839450 | 3.374209  | -0.012325 |
| 6 | -6.577049 | 3.645834  | 1.169200  |
| 1 | -6.180732 | 4.523118  | 1.688408  |
| 1 | -7.596558 | 3.847959  | 0.847563  |
| 1 | -6.573269 | 2.784316  | 1.843032  |

TolSCH<sub>2</sub>CH<sub>2</sub>Ph

|    |           |           |           |
|----|-----------|-----------|-----------|
| 6  | -0.094539 | 0.320425  | -0.021106 |
| 6  | 1.194891  | -0.227071 | -0.037086 |
| 6  | 1.372763  | -1.601005 | -0.027394 |
| 6  | 0.281130  | -2.476755 | -0.001594 |
| 6  | -0.993864 | -1.919965 | 0.014066  |
| 6  | -1.190508 | -0.538486 | 0.004610  |
| 1  | 2.059645  | 0.428357  | -0.057173 |
| 1  | 2.380513  | -2.004986 | -0.040102 |
| 1  | -1.860901 | -2.572677 | 0.034164  |
| 1  | -2.201729 | -0.153145 | 0.017545  |
| 16 | -0.208669 | 2.092173  | -0.035482 |
| 6  | 0.493731  | -3.967345 | 0.008601  |
| 1  | 1.044524  | -4.291184 | -0.878541 |
| 1  | 1.073211  | -4.275043 | 0.883124  |
| 1  | -0.458324 | -4.499853 | 0.028984  |
| 6  | -2.002048 | 2.392210  | -0.009027 |
| 1  | -2.451512 | 1.926932  | -0.888671 |
| 1  | -2.422496 | 1.943259  | 0.893158  |
| 6  | -2.225909 | 3.899593  | -0.019194 |
| 1  | -1.751861 | 4.329017  | -0.907652 |
| 1  | -1.723316 | 4.345079  | 0.845345  |
| 6  | -3.680650 | 4.323641  | 0.000610  |
| 6  | -4.742321 | 3.420043  | 0.026179  |
| 6  | -3.973499 | 5.692193  | -0.007163 |
| 6  | -6.062411 | 3.871491  | 0.043539  |

|   |           |          |           |
|---|-----------|----------|-----------|
| 1 | -4.554443 | 2.352316 | 0.032905  |
| 6 | -5.285901 | 6.145063 | 0.010058  |
| 1 | -3.156436 | 6.407243 | -0.027022 |
| 6 | -6.339553 | 5.232452 | 0.035580  |
| 1 | -6.873297 | 3.152025 | 0.063337  |
| 1 | -5.488857 | 7.210078 | 0.003603  |
| 1 | -7.365235 | 5.582471 | 0.049075  |

TolSCH<sub>2</sub>CHOMePh

|    |           |           |           |
|----|-----------|-----------|-----------|
| 6  | -0.035035 | 0.289727  | 0.292696  |
| 6  | 1.094297  | -0.393805 | -0.172551 |
| 6  | 1.122303  | -1.780304 | -0.177228 |
| 6  | 0.029238  | -2.532012 | 0.266697  |
| 6  | -1.089633 | -1.840425 | 0.724337  |
| 6  | -1.127123 | -0.446924 | 0.748123  |
| 1  | 1.950142  | 0.164600  | -0.536893 |
| 1  | 2.008082  | -2.291145 | -0.542478 |
| 1  | -1.952000 | -2.395368 | 1.079960  |
| 1  | -2.009861 | 0.049584  | 1.132145  |
| 16 | 0.042797  | 2.066146  | 0.322463  |
| 6  | 0.076650  | -4.036897 | 0.250583  |
| 1  | 0.245476  | -4.413973 | -0.761502 |
| 1  | 0.891468  | -4.409136 | 0.877233  |
| 1  | -0.856633 | -4.464524 | 0.619984  |
| 6  | -1.723553 | 2.520943  | 0.337486  |
| 1  | -2.265134 | 1.843307  | -0.324631 |
| 1  | -2.127849 | 2.441929  | 1.348889  |
| 6  | -1.885438 | 3.949437  | -0.166366 |
| 1  | -1.494347 | 4.013722  | -1.191704 |
| 6  | -3.356995 | 4.325629  | -0.178310 |
| 6  | -4.105913 | 4.202704  | -1.346983 |
| 6  | -3.980887 | 4.759027  | 0.992188  |
| 6  | -5.466226 | 4.500760  | -1.347143 |
| 1  | -3.621237 | 3.874362  | -2.261656 |
| 6  | -5.338430 | 5.062166  | 0.992237  |
| 1  | -3.393192 | 4.867895  | 1.897828  |
| 6  | -6.084365 | 4.931930  | -0.177334 |
| 1  | -6.040369 | 4.403894  | -2.261595 |
| 1  | -5.815144 | 5.403151  | 1.904300  |
| 1  | -7.141852 | 5.170037  | -0.176987 |
| 8  | -1.122677 | 4.779629  | 0.682597  |
| 6  | -0.958574 | 6.089773  | 0.176468  |
| 1  | -0.440527 | 6.070874  | -0.789784 |

|   |           |          |          |
|---|-----------|----------|----------|
| 1 | -1.920790 | 6.599880 | 0.055691 |
| 1 | -0.352304 | 6.639086 | 0.895927 |

[TolSCHCH<sub>2</sub>Ph]<sub>(cyc)</sub><sup>+</sup>

|    |           |           |           |
|----|-----------|-----------|-----------|
| 6  | -0.820958 | 0.601370  | -0.949644 |
| 6  | 0.061246  | 0.791899  | 0.109880  |
| 6  | 0.853539  | -0.273578 | 0.516930  |
| 6  | 0.783955  | -1.512958 | -0.124632 |
| 6  | -0.106620 | -1.667816 | -1.192064 |
| 6  | -0.907559 | -0.617796 | -1.617270 |
| 1  | 0.128961  | 1.749913  | 0.613474  |
| 1  | 1.537966  | -0.138225 | 1.346919  |
| 1  | -0.171641 | -2.623609 | -1.700365 |
| 1  | -1.588267 | -0.750222 | -2.451075 |
| 16 | -1.771906 | 1.998028  | -1.522047 |
| 6  | 1.667677  | -2.649988 | 0.302914  |
| 1  | 2.569257  | -2.677448 | -0.316066 |
| 1  | 1.978844  | -2.538348 | 1.342183  |
| 1  | 1.159650  | -3.608641 | 0.188486  |
| 6  | -3.513338 | 1.393484  | -1.387350 |
| 1  | -4.143236 | 1.837964  | -2.149070 |
| 1  | -3.555484 | 0.313890  | -1.310150 |
| 6  | -3.177672 | 2.162514  | -0.194686 |
| 6  | -3.643039 | 3.536331  | 0.068548  |
| 6  | -4.244787 | 4.324286  | -0.917748 |
| 6  | -3.465411 | 4.048424  | 1.356699  |
| 6  | -4.663106 | 5.611792  | -0.611420 |
| 1  | -4.390713 | 3.944975  | -1.923059 |
| 6  | -3.894626 | 5.333844  | 1.660390  |
| 1  | -3.000225 | 3.431798  | 2.118622  |
| 6  | -4.490436 | 6.116429  | 0.675892  |
| 1  | -5.128011 | 6.222106  | -1.376100 |
| 1  | -3.763086 | 5.723931  | 2.662395  |
| 1  | -4.823386 | 7.120620  | 0.910392  |
| 1  | -2.854101 | 1.590423  | 0.670036  |

[TolSCHCH<sub>2</sub>Ph]<sub>(cyc)</sub><sup>•</sup>

|   |           |           |           |
|---|-----------|-----------|-----------|
| 6 | -0.140551 | 1.243559  | -1.413974 |
| 6 | -0.010049 | 1.249715  | -0.023332 |
| 6 | -0.619391 | 0.262008  | 0.738888  |
| 6 | -1.363216 | -0.756813 | 0.136210  |
| 6 | -1.460589 | -0.771616 | -1.255726 |

|    |           |           |           |
|----|-----------|-----------|-----------|
| 6  | -0.855460 | 0.216521  | -2.027705 |
| 1  | 0.547890  | 2.045097  | 0.457739  |
| 1  | -0.529109 | 0.287994  | 1.820556  |
| 1  | -2.021883 | -1.561732 | -1.744145 |
| 1  | -0.950399 | 0.198289  | -3.108084 |
| 16 | 0.543649  | 2.574040  | -2.386522 |
| 6  | -2.055054 | -1.792053 | 0.981094  |
| 1  | -1.361502 | -2.246090 | 1.692729  |
| 1  | -2.863356 | -1.333926 | 1.558697  |
| 1  | -2.484064 | -2.584582 | 0.366470  |
| 6  | -0.938769 | 3.715991  | -2.416423 |
| 1  | -0.598385 | 4.542479  | -3.042368 |
| 1  | -1.740445 | 3.194276  | -2.936952 |
| 6  | -1.300174 | 4.174249  | -1.061948 |
| 6  | -2.264886 | 3.562191  | -0.218313 |
| 6  | -3.100137 | 2.496796  | -0.638958 |
| 6  | -2.383075 | 3.991629  | 1.128508  |
| 6  | -3.971721 | 1.885723  | 0.245277  |
| 1  | -3.045977 | 2.136559  | -1.658722 |
| 6  | -3.257339 | 3.373927  | 2.004444  |
| 1  | -1.756543 | 4.808680  | 1.471615  |
| 6  | -4.055438 | 2.311083  | 1.573267  |
| 1  | -4.589202 | 1.062824  | -0.098300 |
| 1  | -3.319296 | 3.715287  | 3.031750  |
| 1  | -4.735700 | 1.823814  | 2.261832  |
| 1  | -0.696345 | 4.969474  | -0.636589 |

[TolSCHCH<sub>2</sub>Ph]<sub>(lin)</sub><sup>+</sup>

|    |           |           |           |
|----|-----------|-----------|-----------|
| 6  | -1.484467 | 0.003731  | -0.619282 |
| 6  | -0.222882 | 0.557300  | -0.411973 |
| 6  | 0.813890  | -0.277561 | -0.020945 |
| 6  | 0.610615  | -1.650185 | 0.155768  |
| 6  | -0.663326 | -2.175305 | -0.075020 |
| 6  | -1.716629 | -1.359704 | -0.467474 |
| 1  | -0.050508 | 1.618664  | -0.552443 |
| 1  | 1.799508  | 0.143027  | 0.146124  |
| 1  | -0.834004 | -3.238992 | 0.047258  |
| 1  | -2.697924 | -1.783005 | -0.652065 |
| 16 | -2.789492 | 1.066211  | -1.211868 |
| 6  | 1.740471  | -2.533369 | 0.602369  |
| 1  | 2.665493  | -2.275590 | 0.083696  |
| 1  | 1.917884  | -2.407448 | 1.674301  |
| 1  | 1.517328  | -3.584632 | 0.418739  |



|   |           |           |           |
|---|-----------|-----------|-----------|
| 6 | -4.107372 | 0.848269  | 0.065484  |
| 1 | -5.095510 | 0.949592  | -0.367922 |
| 1 | -3.941582 | -0.041174 | 0.660991  |
| 6 | -3.332049 | 2.044505  | 0.373077  |
| 6 | -3.799721 | 3.422574  | 0.137152  |
| 6 | -4.929760 | 3.706824  | -0.636136 |
| 6 | -3.071658 | 4.465645  | 0.715964  |
| 6 | -5.322800 | 5.024632  | -0.824239 |
| 1 | -5.507144 | 2.911436  | -1.094168 |
| 6 | -3.474783 | 5.781909  | 0.532300  |
| 1 | -2.197203 | 4.239193  | 1.316965  |
| 6 | -4.598168 | 6.061549  | -0.240037 |
| 1 | -6.197586 | 5.244156  | -1.424171 |
| 1 | -2.912691 | 6.587138  | 0.989612  |
| 1 | -4.912515 | 7.088169  | -0.386602 |
| 1 | -2.532730 | 1.925280  | 1.098733  |

[TolSCHCH<sub>2</sub>Ph]<sub>(lin)</sub>•

|    |           |           |           |
|----|-----------|-----------|-----------|
| 6  | -0.133533 | 0.296672  | -0.103169 |
| 6  | 1.173513  | -0.206267 | -0.135366 |
| 6  | 1.399385  | -1.572127 | -0.080614 |
| 6  | 0.340320  | -2.482702 | 0.011414  |
| 6  | -0.952574 | -1.969608 | 0.044372  |
| 6  | -1.197868 | -0.597333 | -0.013771 |
| 1  | 2.014184  | 0.476952  | -0.199777 |
| 1  | 2.419959  | -1.941867 | -0.105382 |
| 1  | -1.795415 | -2.649768 | 0.116149  |
| 1  | -2.221810 | -0.248004 | 0.011193  |
| 16 | -0.310184 | 2.061011  | -0.193083 |
| 6  | 0.603985  | -3.964139 | 0.060370  |
| 1  | 1.016624  | -4.319022 | -0.888249 |
| 1  | 1.326074  | -4.209422 | 0.843046  |
| 1  | -0.313419 | -4.520795 | 0.257688  |
| 6  | -2.099672 | 2.298083  | 0.032469  |
| 1  | -2.634705 | 1.813632  | -0.790201 |
| 1  | -2.405062 | 1.811614  | 0.967327  |
| 6  | -2.394587 | 3.760809  | 0.068537  |
| 6  | -3.714545 | 4.277355  | 0.034895  |
| 6  | -4.857551 | 3.441719  | -0.023613 |
| 6  | -3.925059 | 5.679451  | 0.061806  |
| 6  | -6.131624 | 3.985018  | -0.056026 |
| 1  | -4.737639 | 2.364286  | -0.038015 |
| 6  | -5.201154 | 6.210110  | 0.027974  |

|   |           |          |           |
|---|-----------|----------|-----------|
| 1 | -3.062395 | 6.335987 | 0.107973  |
| 6 | -6.315318 | 5.368175 | -0.032517 |
| 1 | -6.992500 | 3.327323 | -0.099849 |
| 1 | -5.336711 | 7.285552 | 0.047810  |
| 1 | -7.314471 | 5.786362 | -0.059524 |
| 1 | -1.573562 | 4.463783 | 0.160318  |

TolSH

|    |           |           |           |
|----|-----------|-----------|-----------|
| 6  | -0.002981 | 0.511963  | -0.010081 |
| 6  | 1.204139  | -0.188921 | -0.050642 |
| 6  | 1.201922  | -1.577111 | -0.040107 |
| 6  | 0.008762  | -2.303332 | 0.009769  |
| 6  | -1.186910 | -1.587710 | 0.051335  |
| 6  | -1.201520 | -0.195736 | 0.041557  |
| 1  | 2.145403  | 0.348821  | -0.088706 |
| 1  | 2.148761  | -2.107348 | -0.071033 |
| 1  | -2.129495 | -2.123905 | 0.093071  |
| 1  | -2.148821 | 0.331060  | 0.076141  |
| 16 | 0.062366  | 2.290545  | -0.023407 |
| 1  | -1.264240 | 2.491798  | 0.025114  |
| 6  | 0.024007  | -3.808771 | 0.001296  |
| 1  | 0.326526  | -4.189117 | -0.978558 |
| 1  | 0.730744  | -4.200081 | 0.736699  |
| 1  | -0.963547 | -4.213454 | 0.227553  |

TolSLi

|    |           |           |           |
|----|-----------|-----------|-----------|
| 6  | -0.019713 | 0.520569  | -0.014754 |
| 6  | 1.185258  | -0.199861 | -0.050718 |
| 6  | 1.198126  | -1.588198 | -0.038428 |
| 6  | 0.014333  | -2.330445 | 0.009619  |
| 6  | -1.184454 | -1.620373 | 0.047855  |
| 6  | -1.202968 | -0.227593 | 0.035334  |
| 1  | 2.121326  | 0.346197  | -0.087094 |
| 1  | 2.151037  | -2.109403 | -0.066678 |
| 1  | -2.124884 | -2.162013 | 0.089011  |
| 1  | -2.163958 | 0.278032  | 0.067286  |
| 16 | 0.018207  | 2.294893  | -0.031547 |
| 6  | 0.043255  | -3.836516 | 0.002341  |
| 1  | 0.351924  | -4.219302 | -0.974936 |
| 1  | 0.750055  | -4.222463 | 0.741039  |
| 1  | -0.941370 | -4.250552 | 0.226771  |
| 3  | -2.127144 | 2.937566  | 0.044899  |

[Tols]-

|    |           |           |           |
|----|-----------|-----------|-----------|
| 6  | 0.013165  | 0.559493  | -0.001603 |
| 6  | 1.205888  | -0.186568 | 0.063605  |
| 6  | 1.207193  | -1.579028 | 0.065947  |
| 6  | 0.022108  | -2.313010 | 0.003388  |
| 6  | -1.170700 | -1.584903 | -0.060992 |
| 6  | -1.177771 | -0.196122 | -0.063673 |
| 1  | 2.149083  | 0.347248  | 0.113944  |
| 1  | 2.156622  | -2.105961 | 0.118201  |
| 1  | -2.117020 | -2.118763 | -0.110113 |
| 1  | -2.123616 | 0.333010  | -0.114218 |
| 16 | 0.003482  | 2.317615  | -0.004917 |
| 6  | 0.016018  | -3.820667 | -0.001099 |
| 1  | -0.398588 | -4.216293 | -0.933461 |
| 1  | 1.027953  | -4.216895 | 0.106981  |
| 1  | -0.588885 | -4.220741 | 0.818011  |

[Tols]+

|    |           |           |           |
|----|-----------|-----------|-----------|
| 6  | 0.009275  | 0.522513  | -0.009965 |
| 6  | 1.266942  | -0.217574 | 0.020810  |
| 6  | 1.260963  | -1.572983 | 0.039696  |
| 6  | 0.025391  | -2.285228 | 0.030584  |
| 6  | -1.218986 | -1.585677 | 0.000606  |
| 6  | -1.240380 | -0.231402 | -0.019706 |
| 1  | 2.191187  | 0.348670  | 0.029229  |
| 1  | 2.186300  | -2.135292 | 0.064520  |
| 1  | -2.138227 | -2.158946 | -0.004592 |
| 1  | -2.170696 | 0.324292  | -0.041980 |
| 16 | 0.002287  | 2.152200  | -0.038638 |
| 6  | 0.024750  | -3.756874 | 0.018357  |
| 1  | -0.118810 | -4.068473 | -1.029271 |
| 1  | 0.967593  | -4.176829 | 0.364469  |
| 1  | -0.822655 | -4.159984 | 0.575883  |

[Tols]\*

|   |           |           |           |
|---|-----------|-----------|-----------|
| 6 | 0.012067  | 0.527010  | -0.005783 |
| 6 | 1.227201  | -0.194525 | 0.039496  |
| 6 | 1.225661  | -1.576980 | 0.048595  |
| 6 | 0.024053  | -2.296714 | 0.012222  |
| 6 | -1.186055 | -1.585343 | -0.031287 |

|    |           |           |           |
|----|-----------|-----------|-----------|
| 6  | -1.199246 | -0.205823 | -0.041127 |
| 1  | 2.161462  | 0.353907  | 0.068725  |
| 1  | 2.166348  | -2.115689 | 0.085089  |
| 1  | -2.122291 | -2.133365 | -0.057445 |
| 1  | -2.137547 | 0.335422  | -0.074313 |
| 16 | 0.005263  | 2.243683  | -0.016371 |
| 6  | 0.019097  | -3.796691 | 0.001401  |
| 1  | -0.268042 | -4.166580 | -0.987818 |
| 1  | 1.003176  | -4.199918 | 0.241339  |
| 1  | -0.706213 | -4.189980 | 0.717277  |

TolSSTol

|    |           |           |           |
|----|-----------|-----------|-----------|
| 6  | -1.901760 | -0.360839 | 0.173431  |
| 6  | -3.176643 | -0.424453 | 0.740598  |
| 6  | -4.125879 | 0.533881  | 0.414928  |
| 6  | -3.837288 | 1.564726  | -0.484424 |
| 6  | -2.562284 | 1.604470  | -1.045394 |
| 6  | -1.593513 | 0.657175  | -0.720937 |
| 1  | -3.429031 | -1.222848 | 1.430779  |
| 1  | -5.113620 | 0.474832  | 0.861276  |
| 1  | -2.311415 | 2.392646  | -1.747765 |
| 1  | -0.610692 | 0.716770  | -1.173740 |
| 16 | -0.741274 | -1.611839 | 0.718987  |
| 16 | 0.740587  | -1.615141 | -0.707462 |
| 6  | 1.901398  | -0.362075 | -0.167365 |
| 6  | 3.176264  | -0.428493 | -0.734249 |
| 6  | 1.593416  | 0.659908  | 0.722555  |
| 6  | 4.125749  | 0.531006  | -0.412760 |
| 6  | 2.562433  | 1.608357  | 1.042879  |
| 6  | 3.837426  | 1.565838  | 0.482088  |
| 1  | 3.428444  | -1.229955 | -1.420942 |
| 1  | 0.610610  | 0.721732  | 1.175093  |
| 1  | 5.113474  | 0.469755  | -0.858846 |
| 1  | 2.311769  | 2.399654  | 1.741807  |
| 6  | -4.885991 | 2.584533  | -0.839837 |
| 1  | -5.709264 | 2.120147  | -1.389453 |
| 1  | -5.308234 | 3.041260  | 0.058498  |
| 1  | -4.469783 | 3.377744  | -1.462275 |
| 6  | 4.886394  | 2.586912  | 0.833053  |
| 1  | 5.709546  | 2.124713  | 1.384689  |
| 1  | 5.308754  | 3.039608  | -0.067266 |
| 1  | 4.470392  | 3.382938  | 1.452025  |

TolSS Tol•Sty - TS

|    |           |           |           |
|----|-----------|-----------|-----------|
| 6  | -0.450154 | 1.320606  | -0.937962 |
| 6  | -1.505664 | 1.410060  | -0.031461 |
| 6  | -1.293456 | 1.997459  | 1.211924  |
| 6  | -0.042461 | 2.504718  | 1.560804  |
| 6  | 1.007491  | 2.402452  | 0.636302  |
| 6  | 0.818069  | 1.803698  | -0.596523 |
| 1  | -2.482499 | 1.020228  | -0.294079 |
| 1  | -2.113954 | 2.062436  | 1.918129  |
| 1  | 1.989565  | 2.779775  | 0.902588  |
| 1  | 1.650218  | 1.685103  | -1.282981 |
| 16 | -0.709512 | 0.423398  | -2.436202 |
| 16 | 0.784735  | -1.401591 | -2.424923 |
| 6  | 0.115787  | -1.869821 | -0.826874 |
| 6  | -1.051395 | -2.628298 | -0.714159 |
| 6  | 0.799106  | -1.501412 | 0.336601  |
| 6  | -1.530107 | -2.996596 | 0.538479  |
| 6  | 0.315422  | -1.877253 | 1.583787  |
| 6  | -0.857973 | -2.626241 | 1.705867  |
| 1  | -1.586665 | -2.924555 | -1.609926 |
| 1  | 1.709134  | -0.917162 | 0.256833  |
| 1  | -2.440316 | -3.583254 | 0.611036  |
| 1  | 0.855193  | -1.581514 | 2.478377  |
| 6  | 0.193498  | 3.146724  | 2.899051  |
| 1  | -0.699117 | 3.101457  | 3.523576  |
| 1  | 1.010756  | 2.649131  | 3.426979  |
| 1  | 0.475332  | 4.196041  | 2.778043  |
| 6  | -1.367493 | -3.031708 | 3.062743  |
| 1  | -0.702819 | -3.768498 | 3.522482  |
| 1  | -1.415874 | -2.171852 | 3.735146  |
| 1  | -2.363468 | -3.471725 | 2.996056  |
| 6  | 0.286255  | 1.240736  | -3.875222 |
| 6  | 1.105836  | 0.212505  | -4.495131 |
| 1  | 0.815704  | 2.067566  | -3.405476 |
| 1  | -0.526970 | 1.621560  | -4.495161 |
| 1  | 0.620380  | -0.433487 | -5.217747 |
| 6  | 2.527627  | 0.139668  | -4.401501 |
| 6  | 3.196830  | -0.973130 | -4.972311 |
| 6  | 3.334554  | 1.068350  | -3.697149 |
| 6  | 4.568098  | -1.140365 | -4.849718 |
| 1  | 2.611453  | -1.706194 | -5.518769 |
| 6  | 4.705458  | 0.892863  | -3.584173 |
| 1  | 2.886185  | 1.950834  | -3.254148 |

|   |          |           |           |
|---|----------|-----------|-----------|
| 6 | 5.341979 | -0.210616 | -4.155388 |
| 1 | 5.039506 | -2.006721 | -5.302091 |
| 1 | 5.290676 | 1.631895  | -3.046438 |
| 1 | 6.413537 | -0.339863 | -4.062938 |

## 8. References

1. Y. Yuan, Y. X. Chen, S. Tang, *Sci. Adv.* **2018**, *4*, 5312-5318.
2. W. H. Li, H. Wang, S. P. Liu, *Adv. Synth. Catal.* **2020**, *362*, 2666-2671.
3. X. R. Wang, F. Chen, *Tetrahedron* **2011**, *67*, 4547-4551.
4. I. A. MacKenzie, L. Wang, N. P. R. Onuska, O. F. Williams, K. Begam, A. M. Moran, B. D. Dunietz, D. A. Nicewicz, *Nature* **2020**, *580*, 76-80.
5. I. Medina-Mercado, E. O. Asomoza-Solís, Eduardo Martínez-González, V. M. Ugalde-Saldívar, L. G. Ledesma-Olvera, J. E. Barquera-Lozada, V. Gjmez-Vidales, J. Barroso-Flores, B. A. Frontana-Uribe, S. Porcel, *Chem. Eur. J.* **2020**, *26*, 634-642.
6. G. M. Sheldrick, Program SADABS: Area-Detector Absorption Correction, University of Gottingen, Germany, 1996.
7. G. M. Sheldrick, SHELXS-97, SHELXL-97, Programs for Crystal Structure Analysis, University of Gottingen, Germany, 1997.
8. Y. Zhao, D. Truhlar, *Theor. Chem. Acc.* **2007**, *120*, 215-241.
9. J. Tomasi, B. Mennucci, E. Cancès, *J. Mol. Struct.: Theochem.* **1999**, *464*, 211-226.
10. a) J. P. Foster, F. Weinhold, *J. Am. Chem. Soc.* **1980**, *102*, 7211-7218; b) A. E. Reed, F. Weinhold, *J. Chem. Phys.* **1983**, *78*, 4066-4073; c) A. E. Reed, Weinstock, R. B.; F. Weinhold, *J. Chem. Phys.* **1985**, *83*, 735-746; d) A. E. Reed, F. Weinhold, *J. Chem. Phys.* **1985**, *83*, 1736-1740; e) J. E. Carpenter, "Extension of Lewis structure concepts to open-shell and excited-state molecular species," *Ph.D. thesis*, University of Wisconsin, Madison, WI, **1987**; f) J. E. Carpenter, F. Weinhold, *J. Mol. Struct. (Theochem)*, **1988**, *139*, 41-62; g) A. E. Reed, L. A. Curtiss, F. Weinhold, *Chem. Rev.* **1988**, *88*, 899-926; h) F. Weinhold, J. E. Carpenter, in "The Structure of Small Molecules and Ions," Ed. R. Naaman and Z. Vager (Plenum), **1988**, pp. 227-236.
11. a) A. D. Becke, K. E. Edgecombe, *J. Chem. Phys.* **1990**, *92*, 5397-5403; b) A. Savin, O. Jepsen, J. Flad, O. K. Andersen, H. Preuss, H. G. von Schnering, *Angew. Chem. Int. Ed.* **1992**, *31*, 187-188.

12. G. B. Bacskay, "A Quadratically Convergent Hartree-Fock (QC-SCF) Method. Application to Closed Systems," *Chem. Phys.* **1981**, *61*, 385-404.
13. M. J. Frisch, G. W. Trucks, H. B. Schlegel, G. E. Scuseria, M. A. Robb, J. R. Cheeseman, G. Scalmani, V. Barone, G. A. Petersson, H. Nakatsuji, et al., Gaussian 16, Rev. A.03. Gaussian Inc., Wallingford CT, 2016.



## 9. Copies of NMR spectra of the products

Sep07-2020-OSSO\_cj.12.fid — WYN-X200907-1

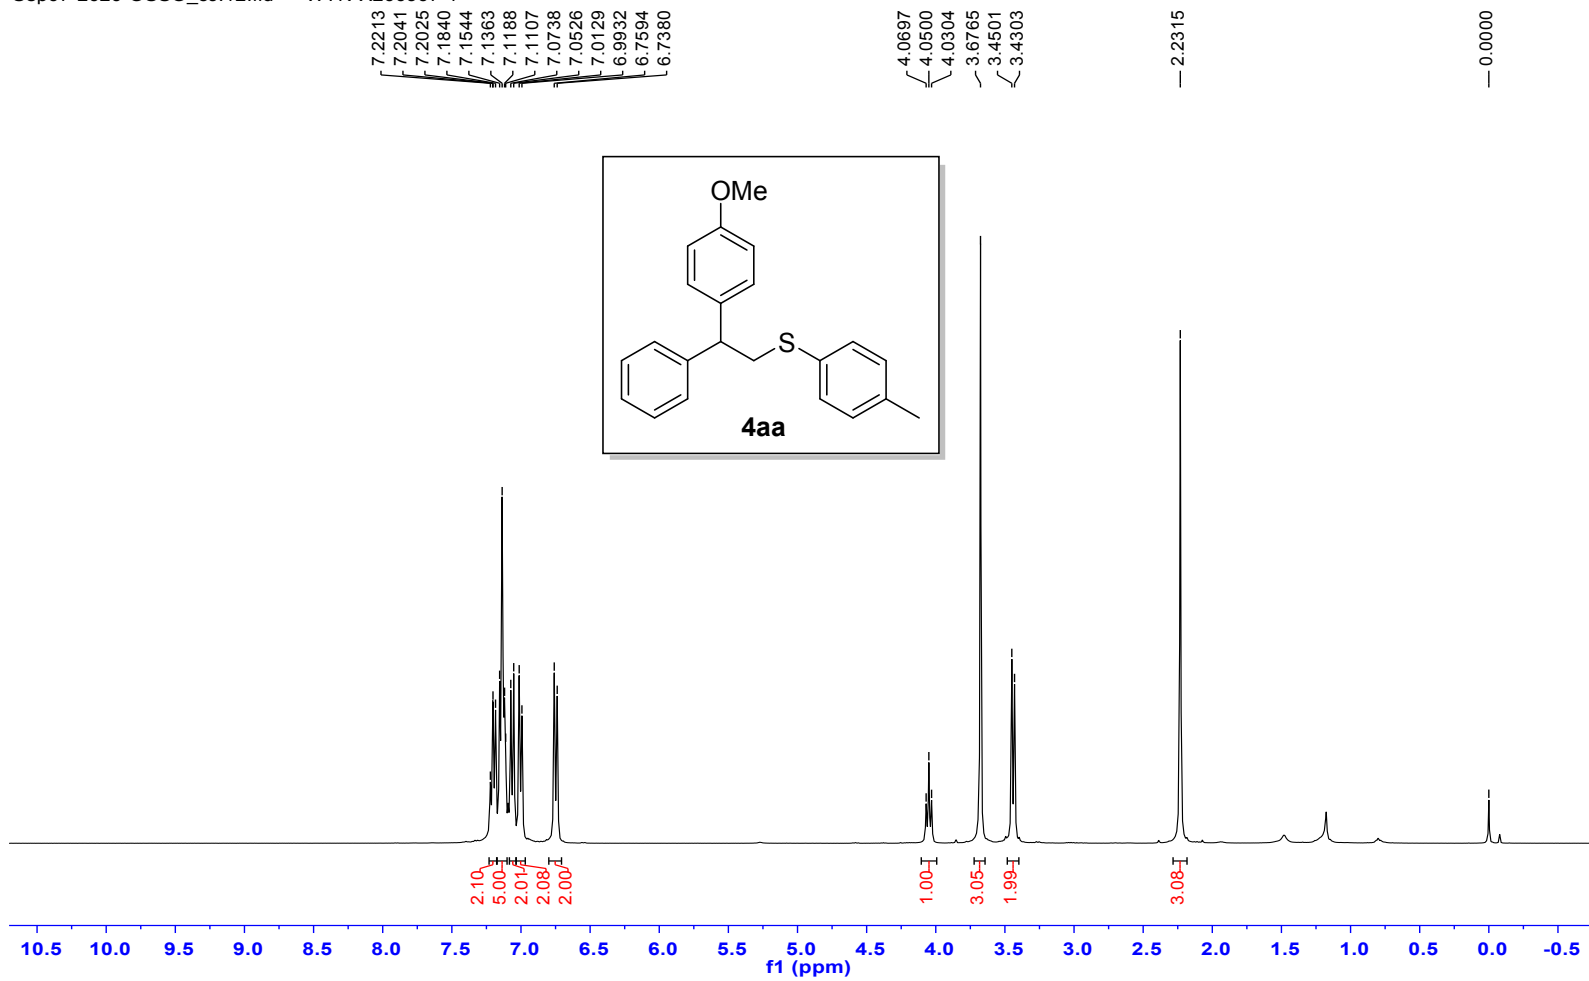

Sep08-2020-OSSO\_cj.41.fid — WYN-X200907-1

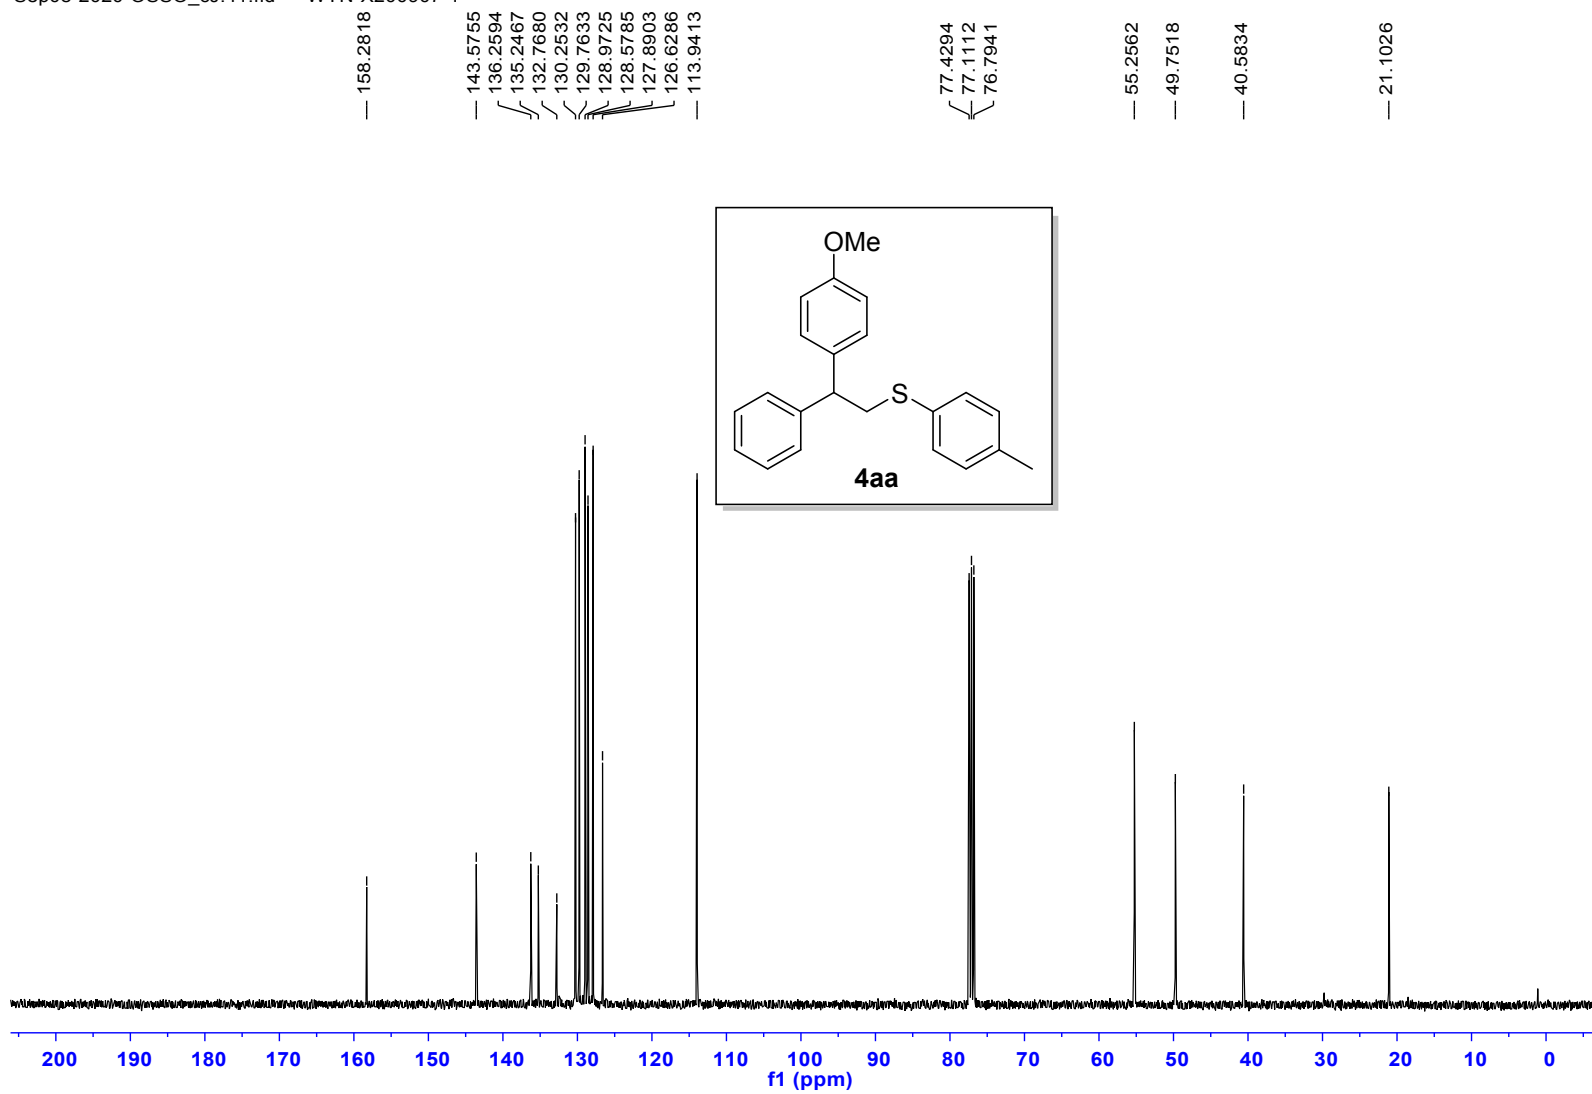

Sep17-2020-osso-cj.18.fid — wyn-x200917-1

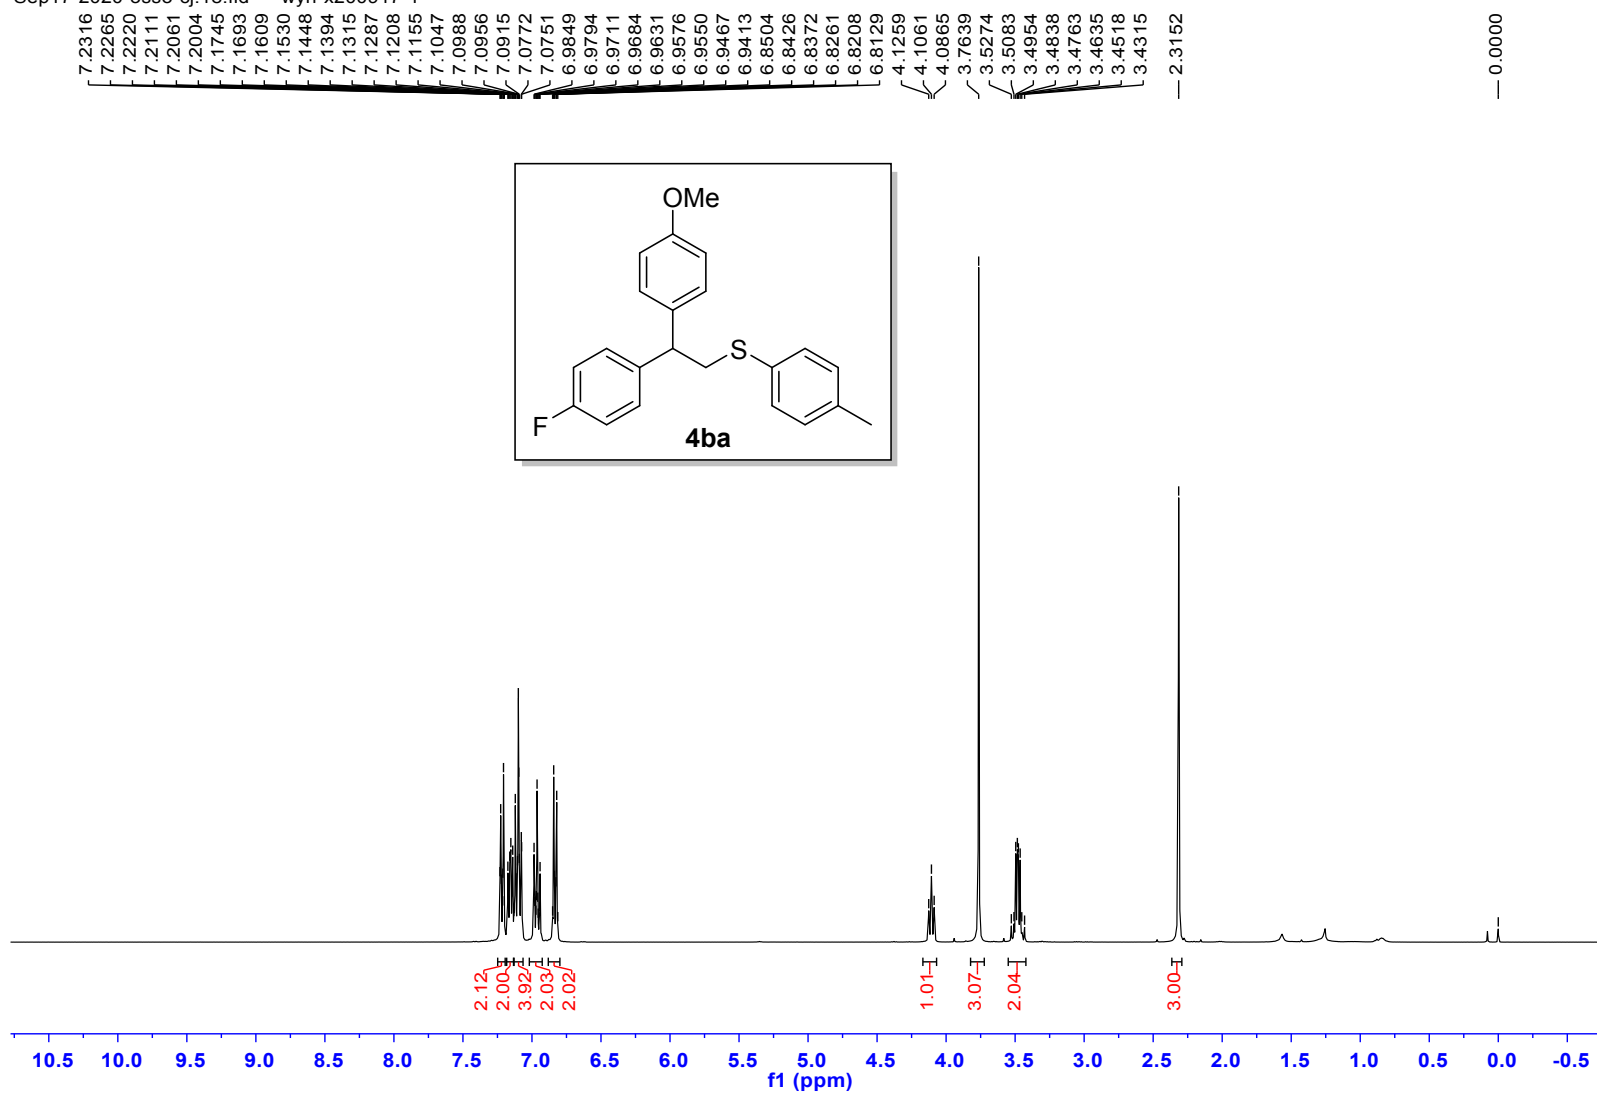

Sep17-2020-osso-cj.23.fid — WYN-X200917-1-C

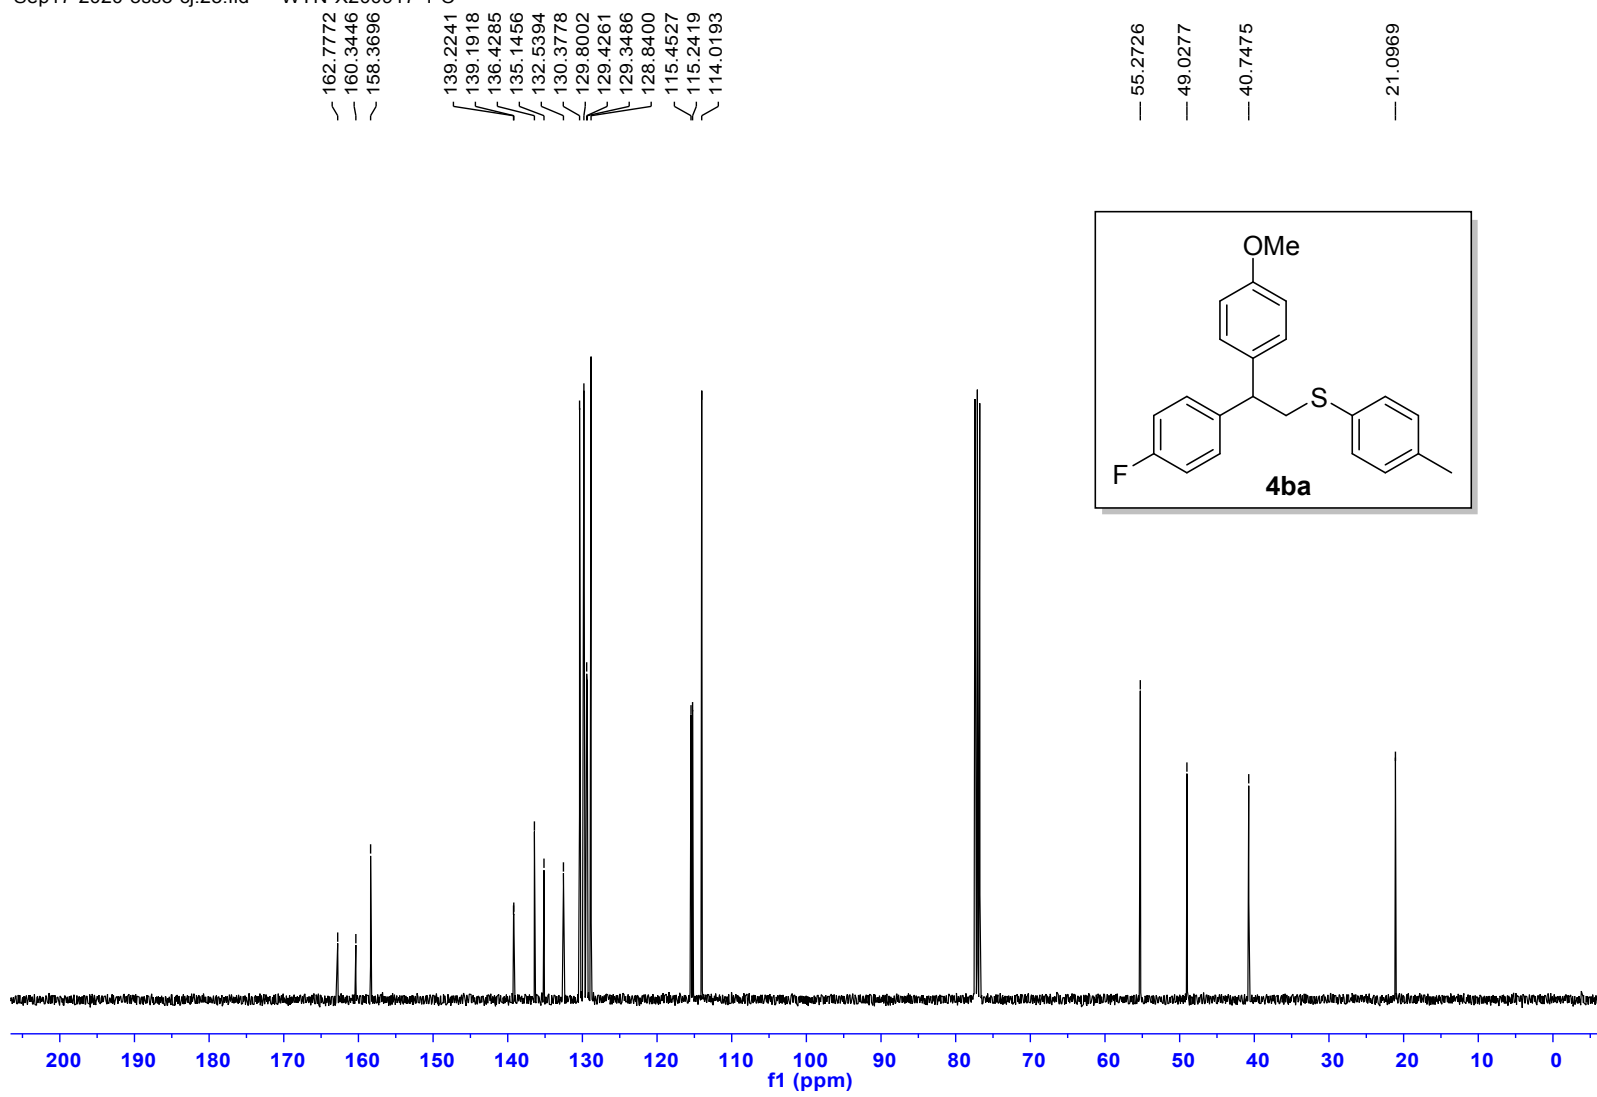

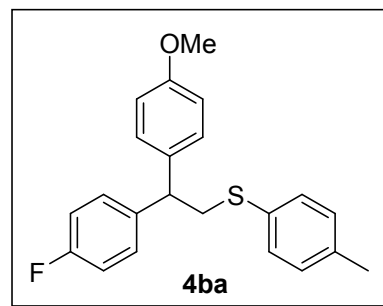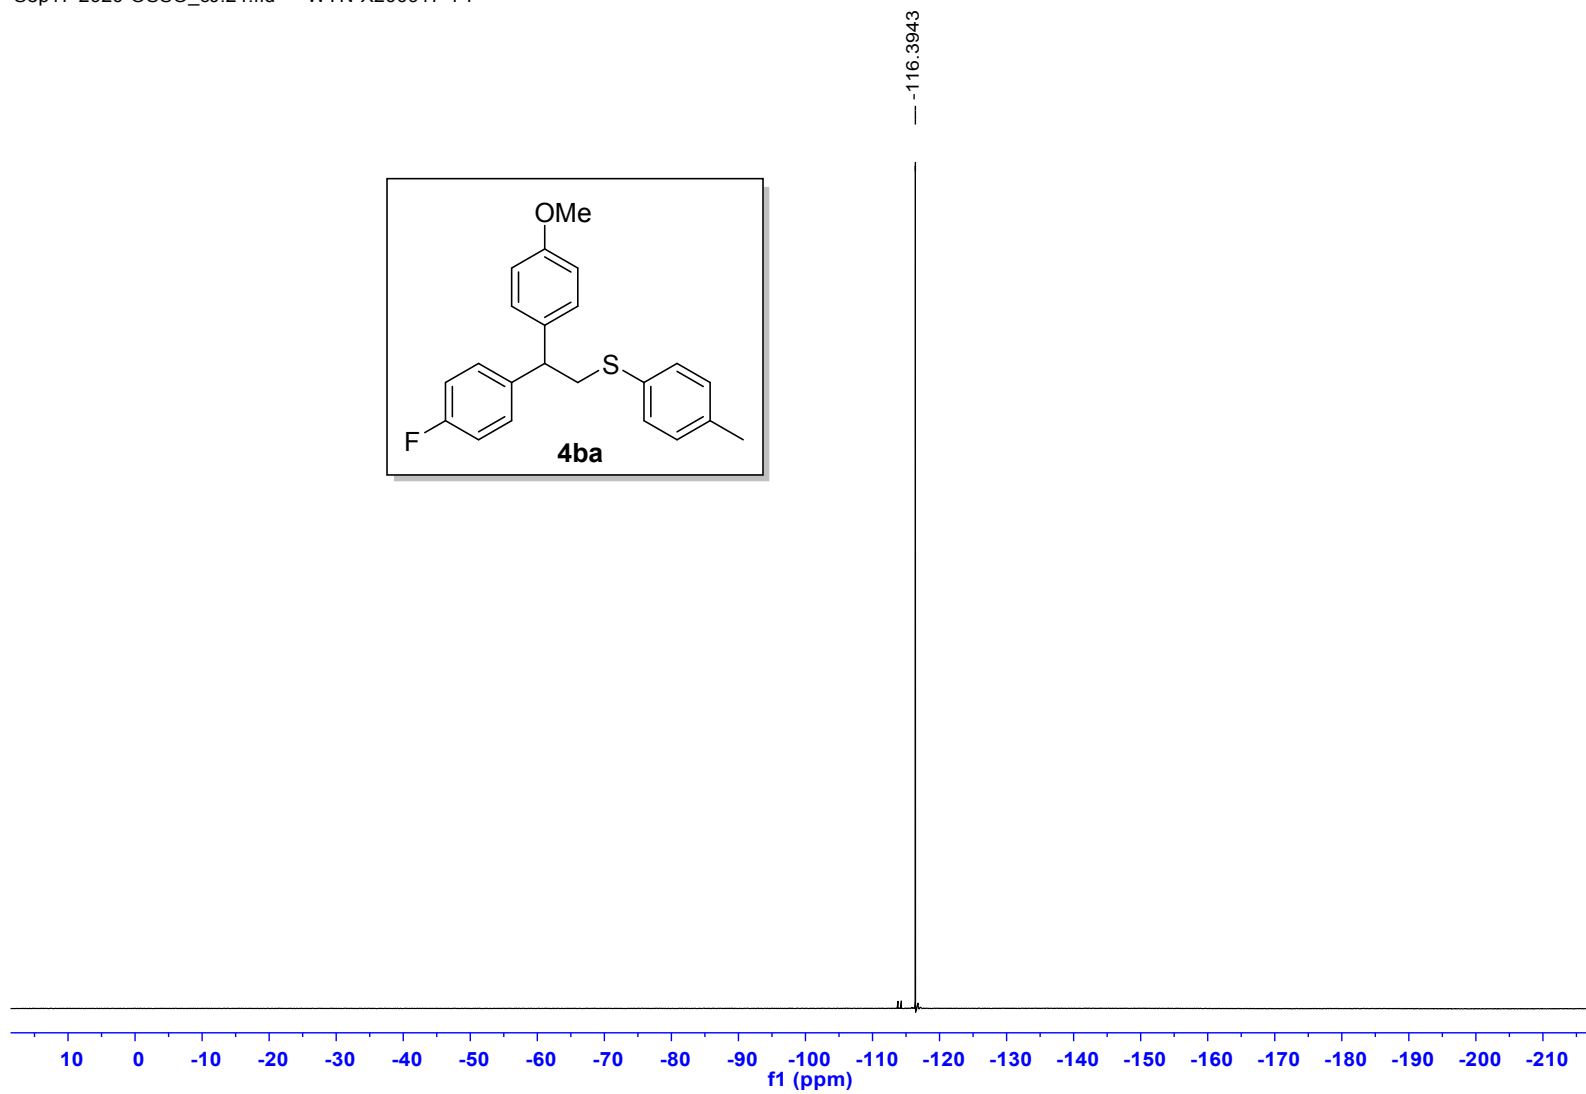

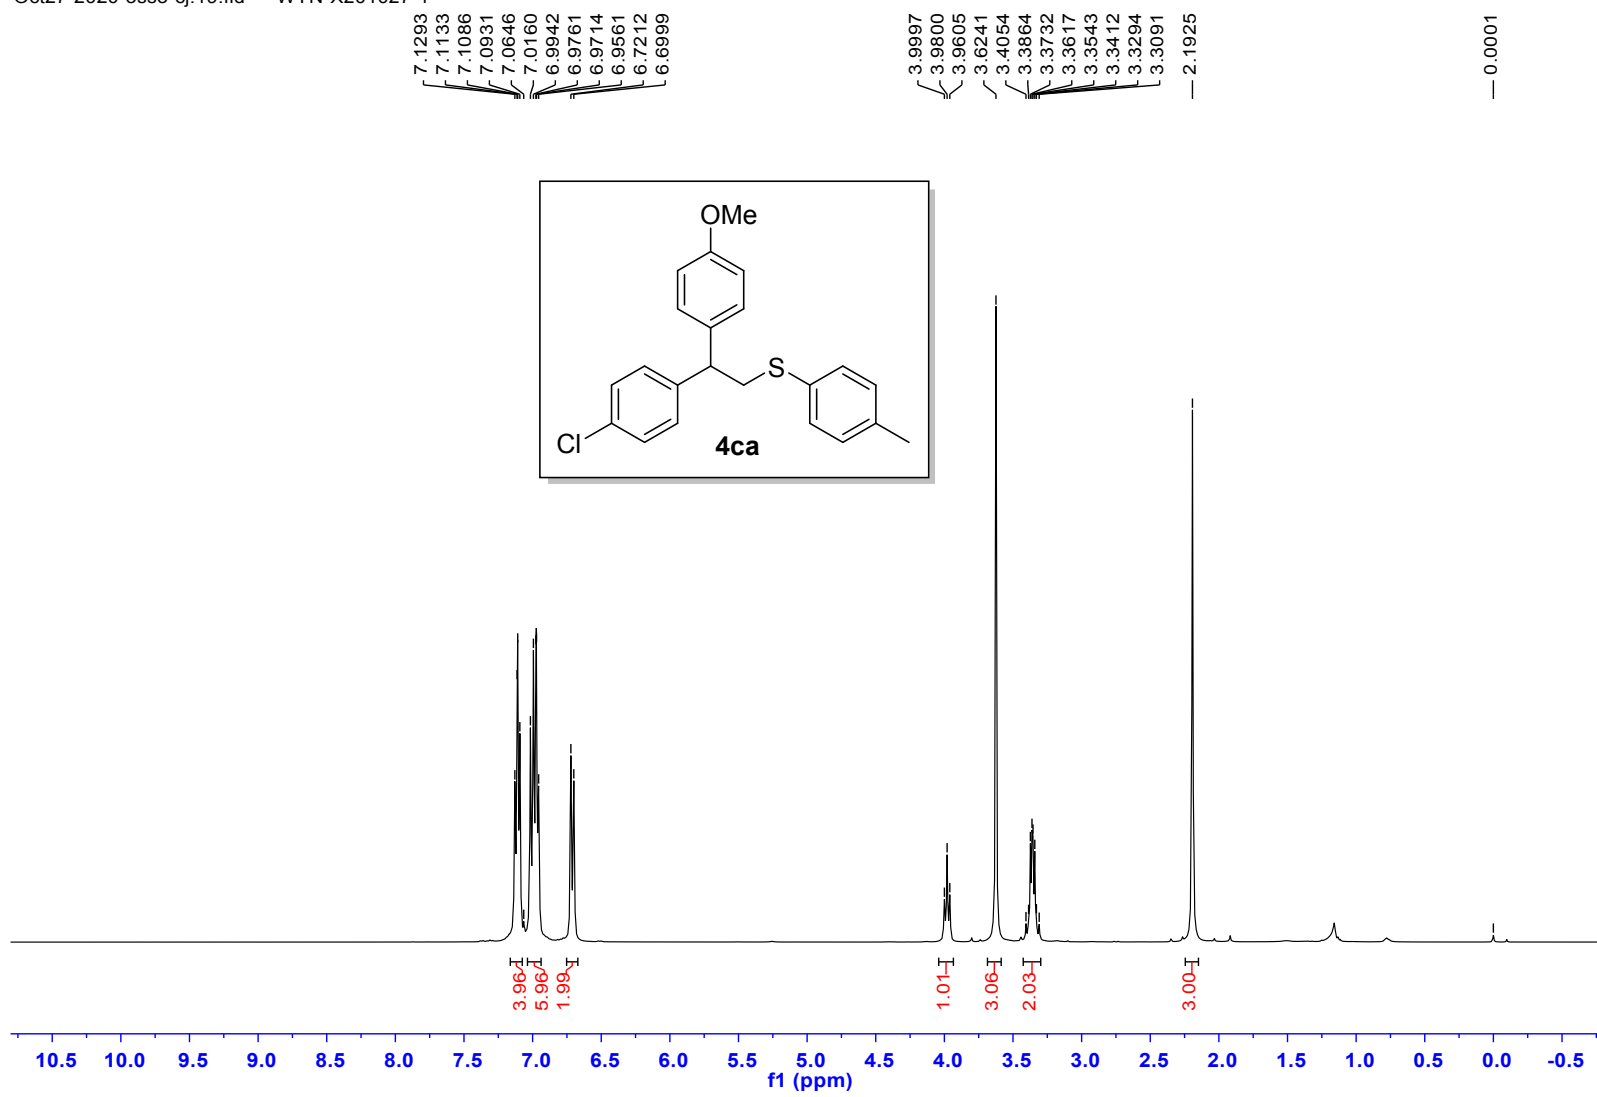

Oct28-2020-OSSO\_cj.13.fid — WYN-X201028-1

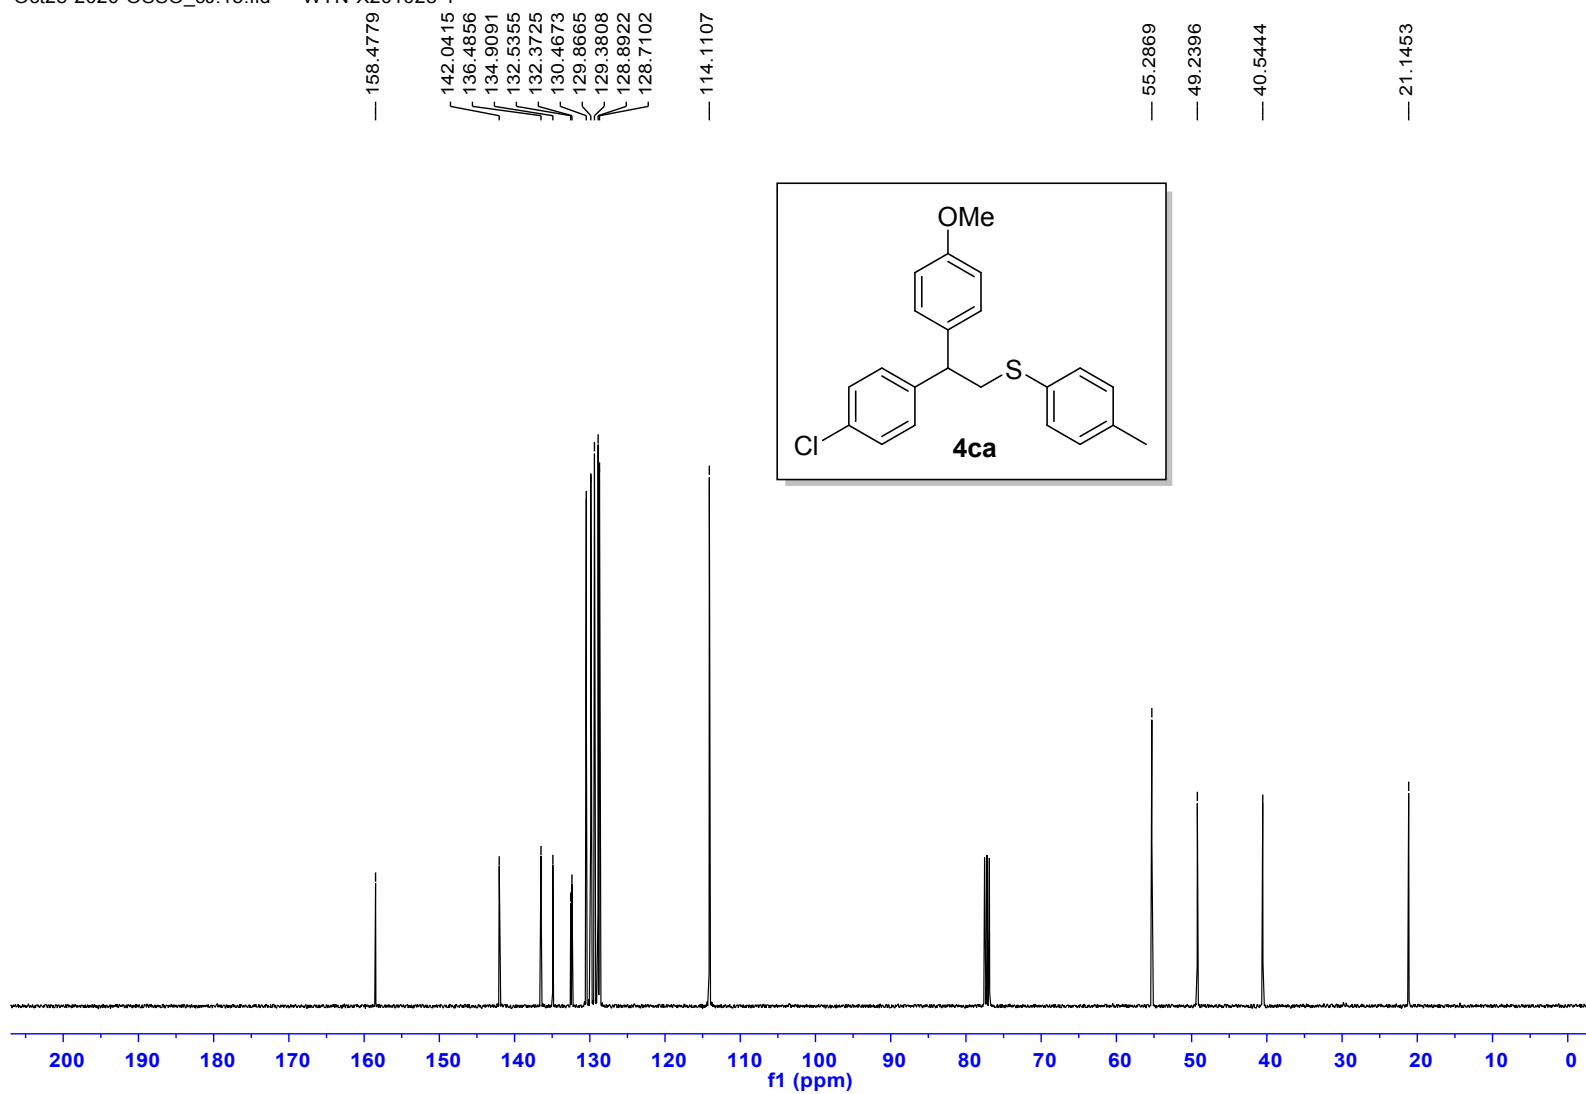

Nov12-2020-OSSO\_cj.11.fid — WYN-X201112-8

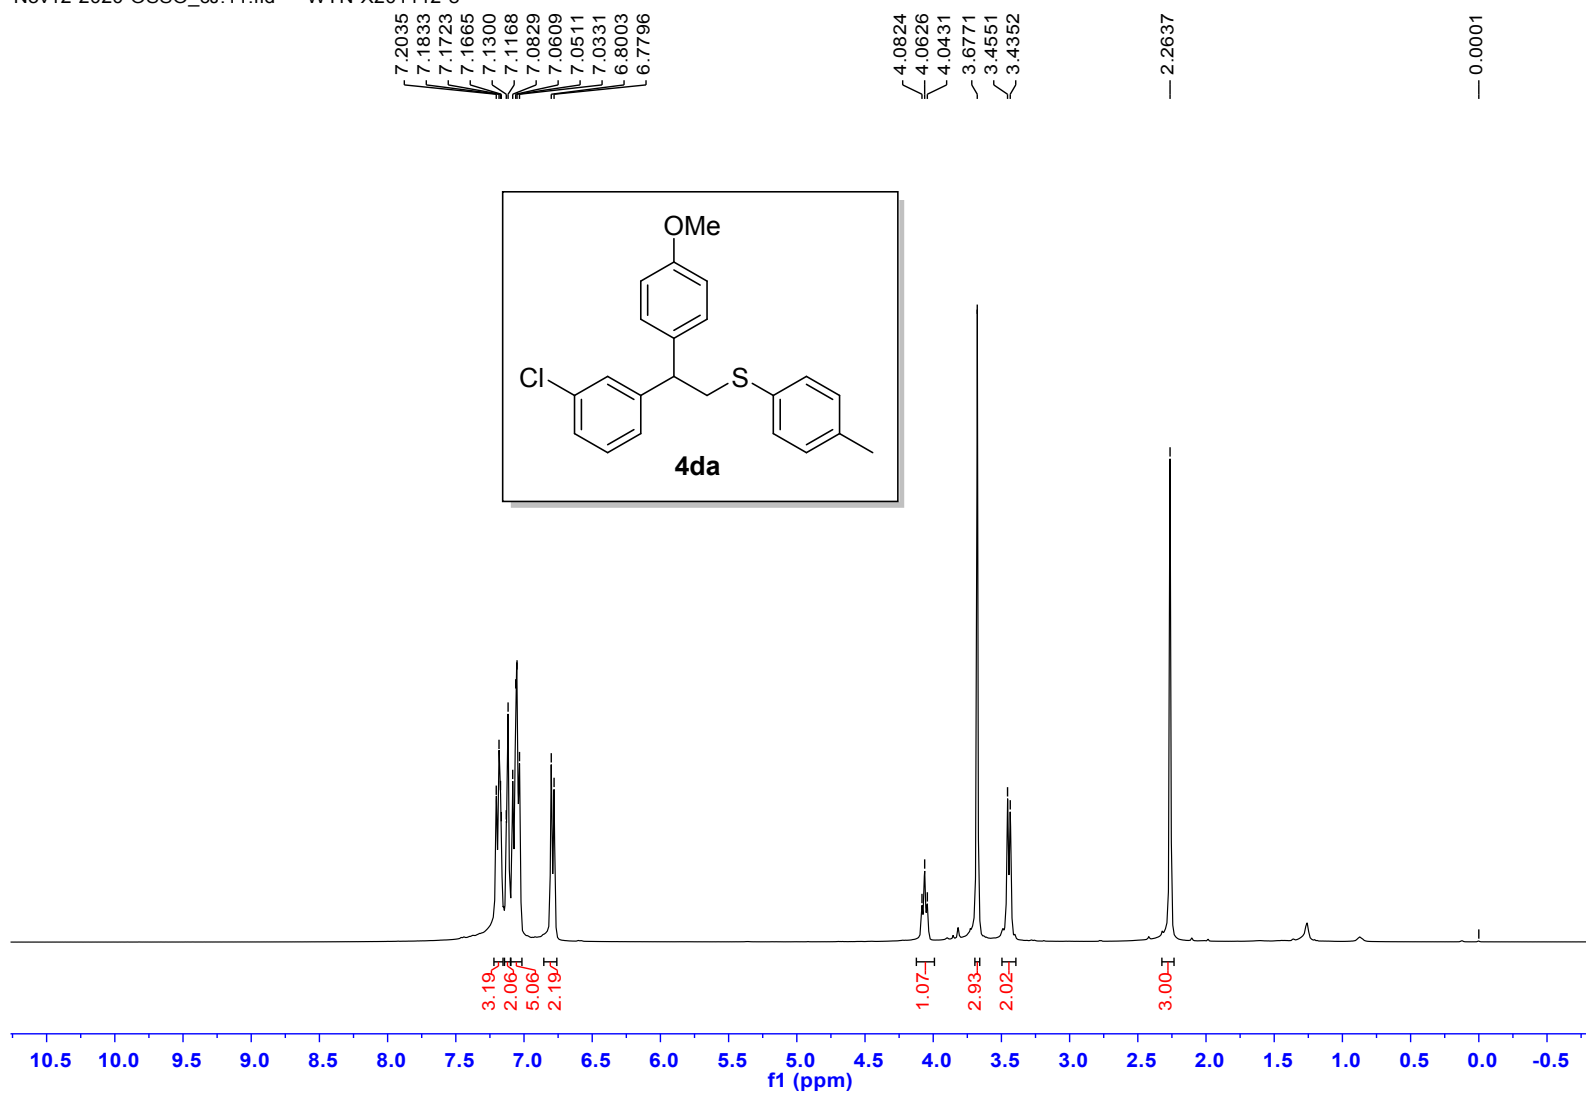



Nov12-2020-OSSO\_cj.47.fid — WYN-X201112-8-C

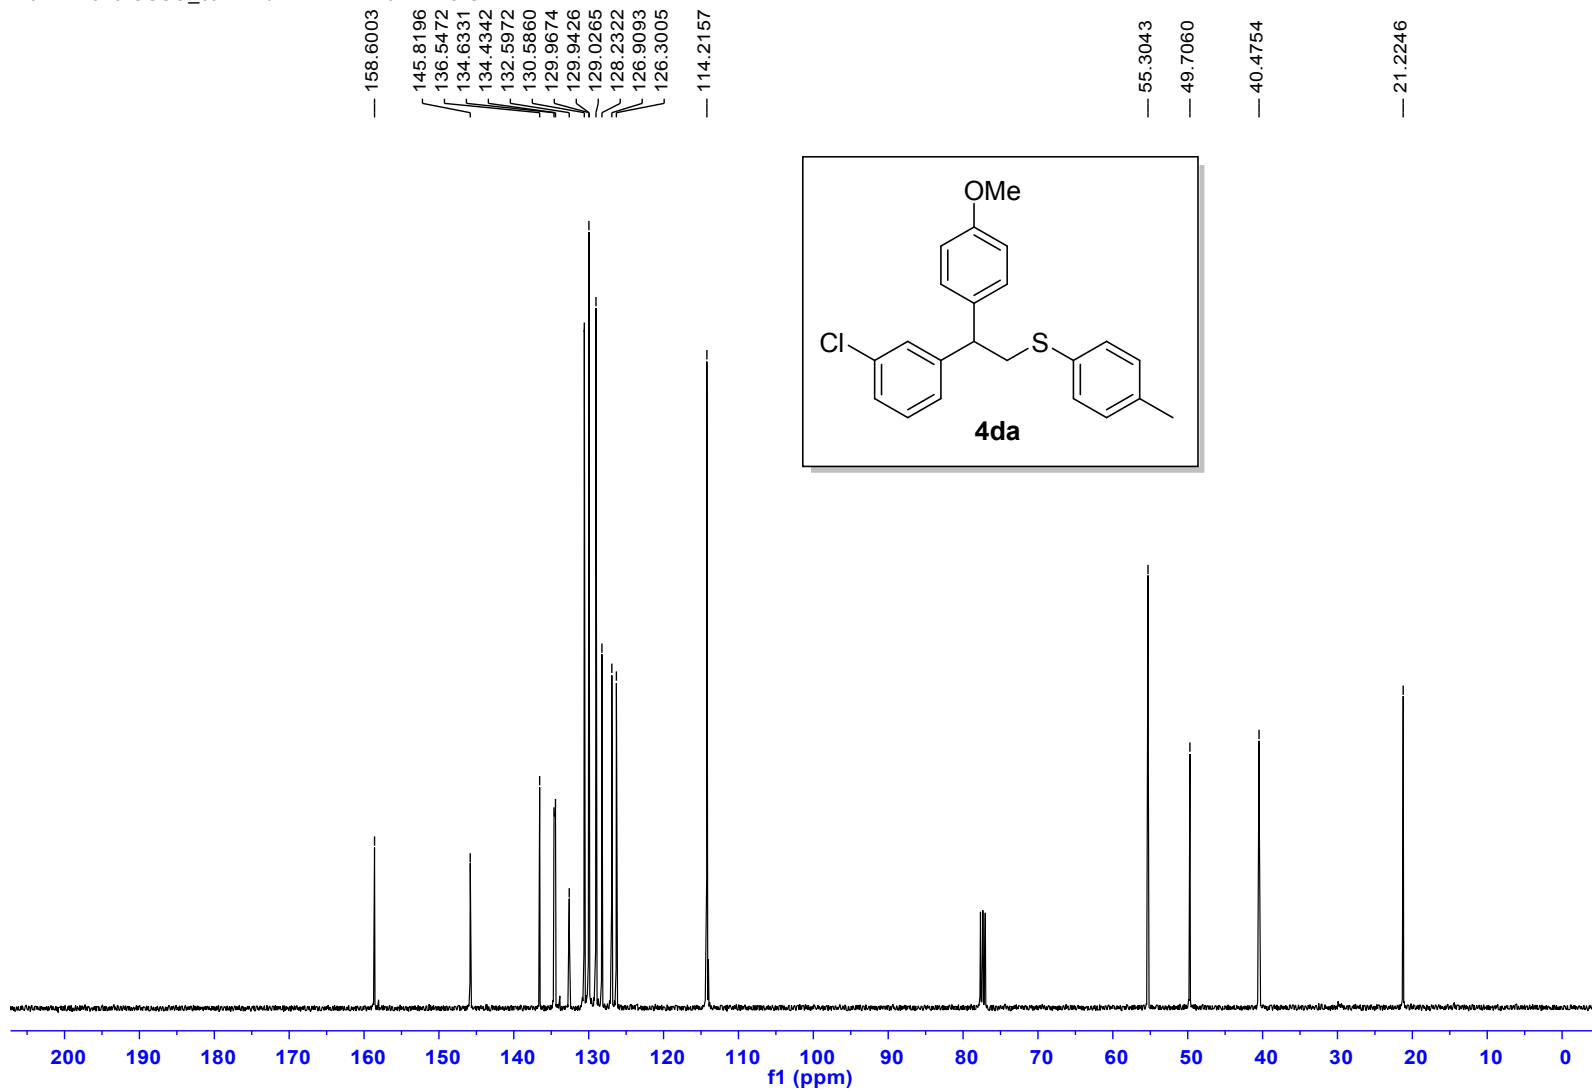

Nov12-2020-OSSO\_cj.10.fid — WYN-X201112-7

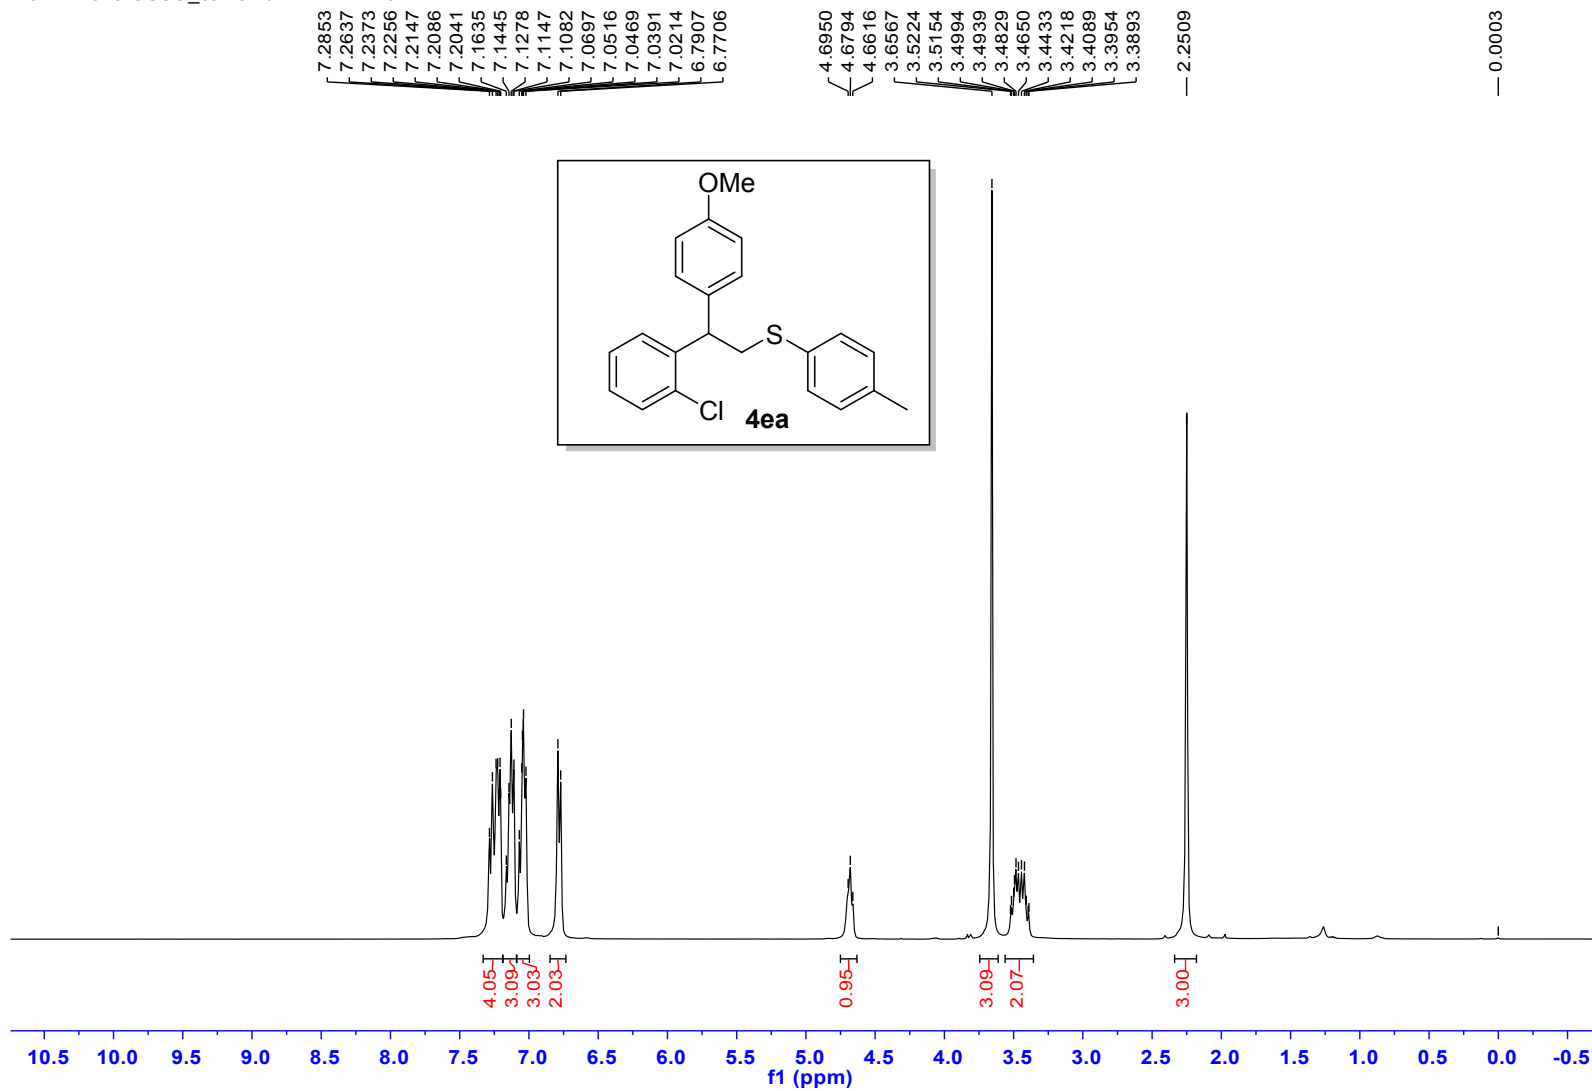

Nov12-2020-OSSO\_cj.46.fid — WYN-X201112-7-C

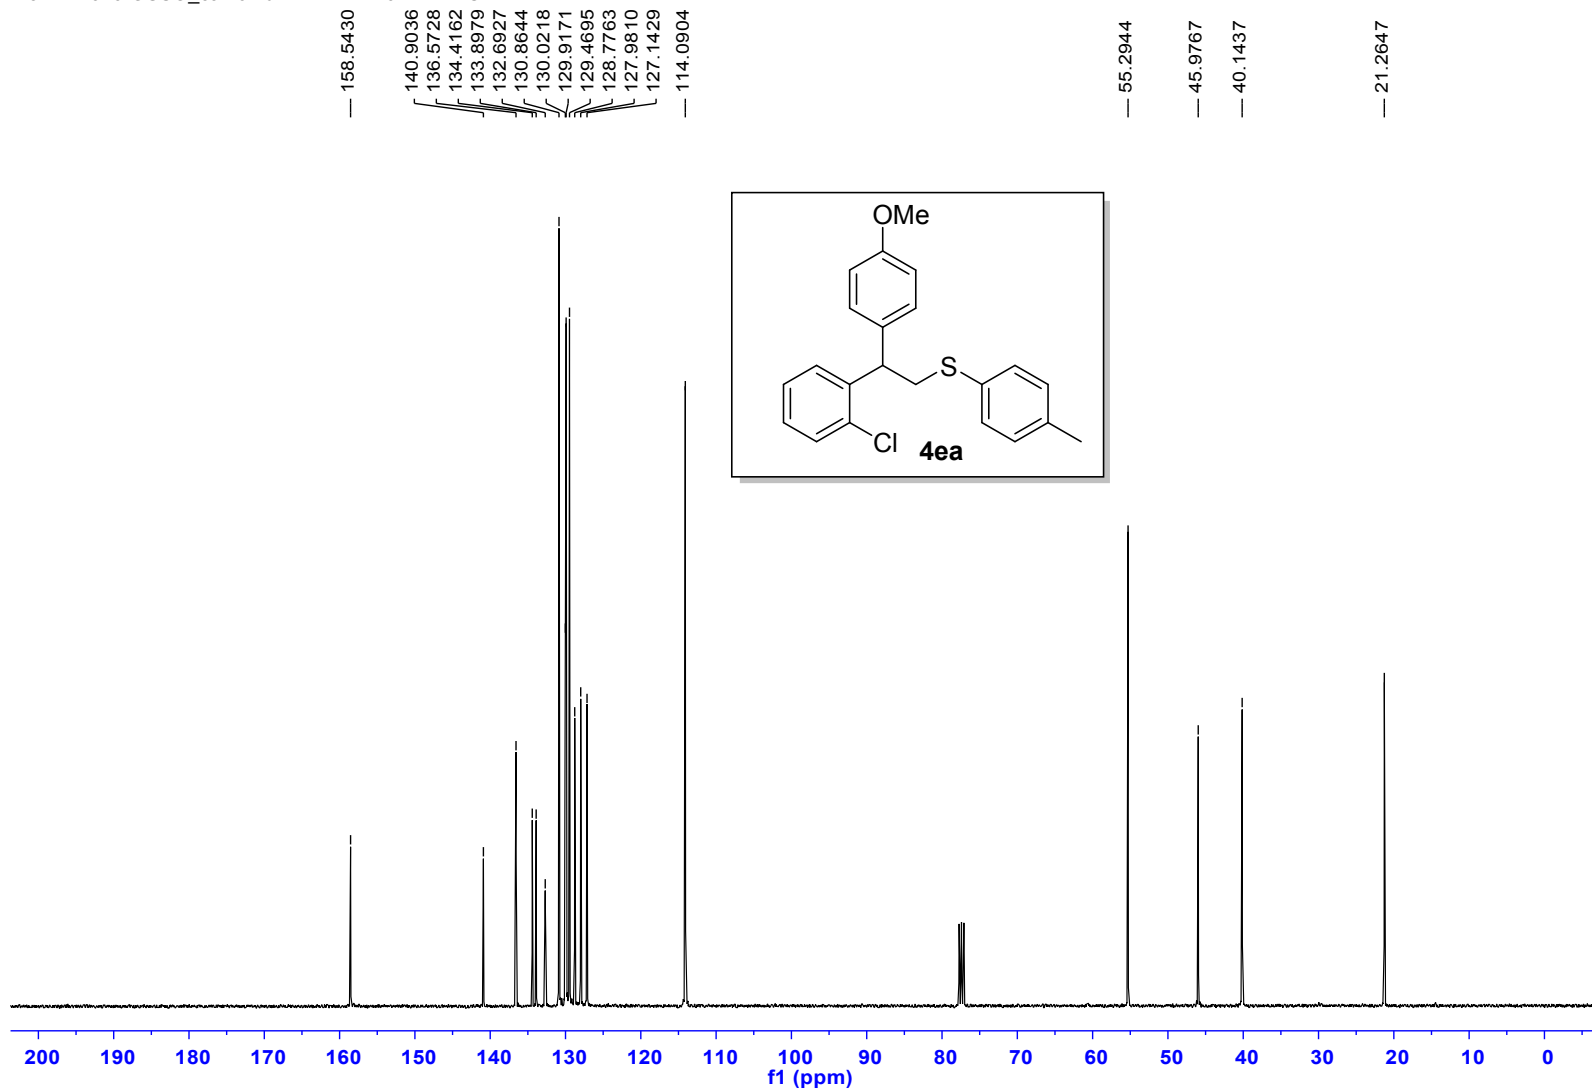

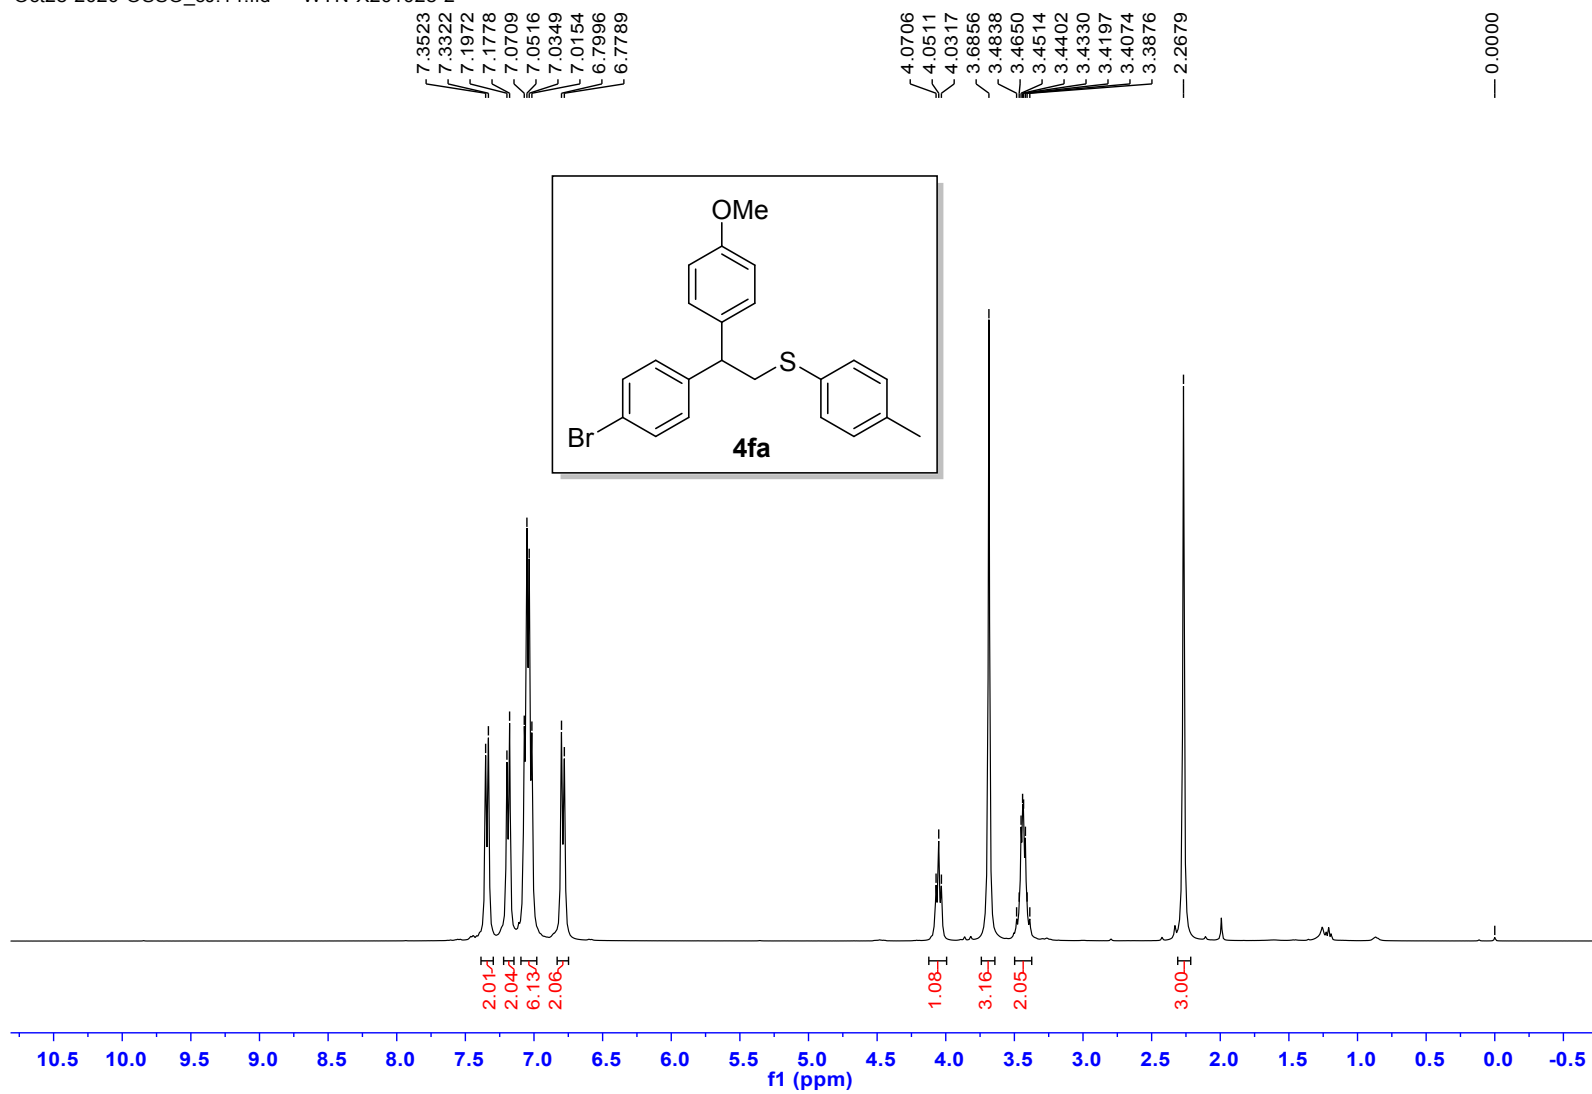

Nov12-2020-OSSO\_cj.4.fid — WYN-X201112-1

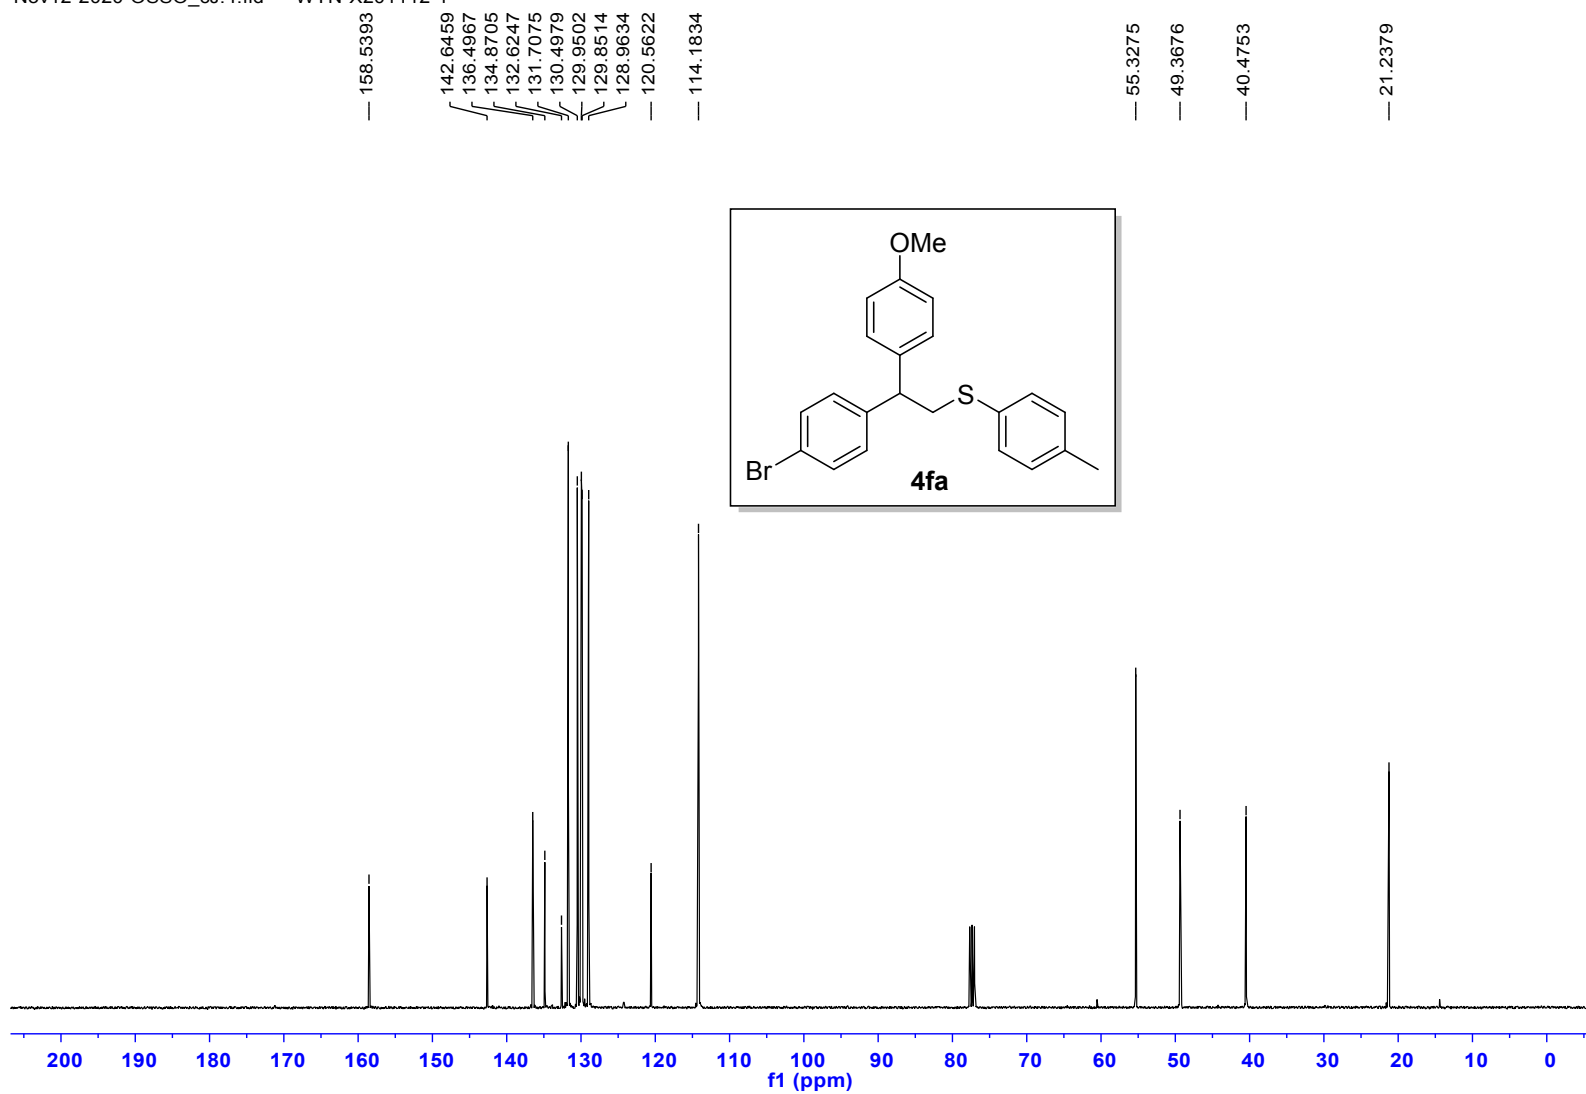

7.4602  
7.4503  
7.4398  
7.3899  
7.3775  
7.2250  
7.2049  
7.1293  
7.1077  
7.0986  
7.0784  
6.8537  
6.8320

4.1827  
4.1631  
4.1434  
3.7679  
3.5627  
3.5438  
3.5303  
3.5113  
3.4907  
3.4787  
3.4583

— 2.3175

— 0.0001

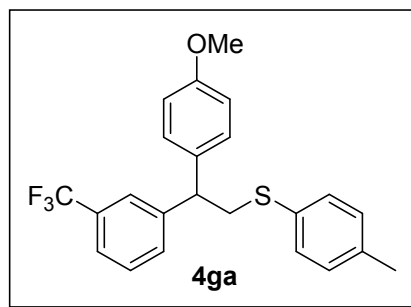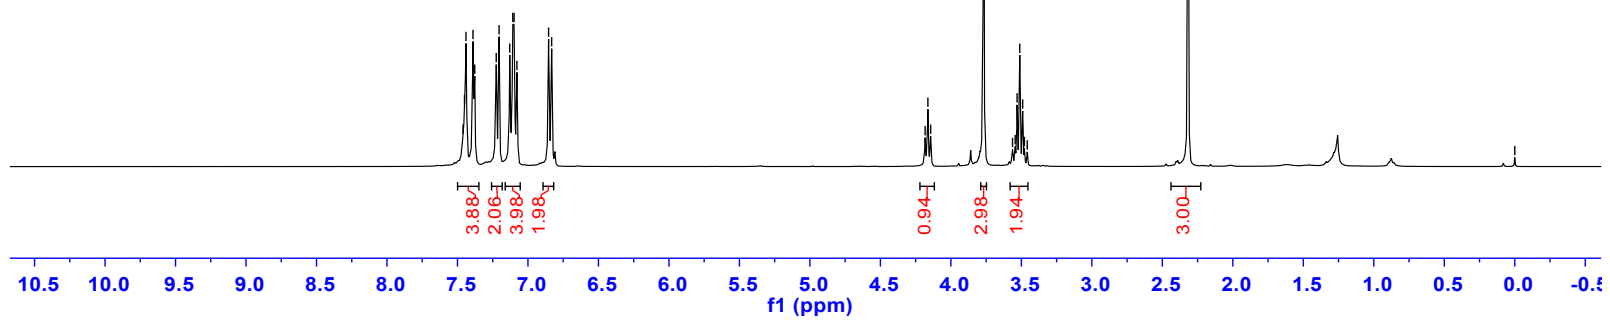

Nov27-2020-OSSO\_cj.11.fid — WYN-X201127-5

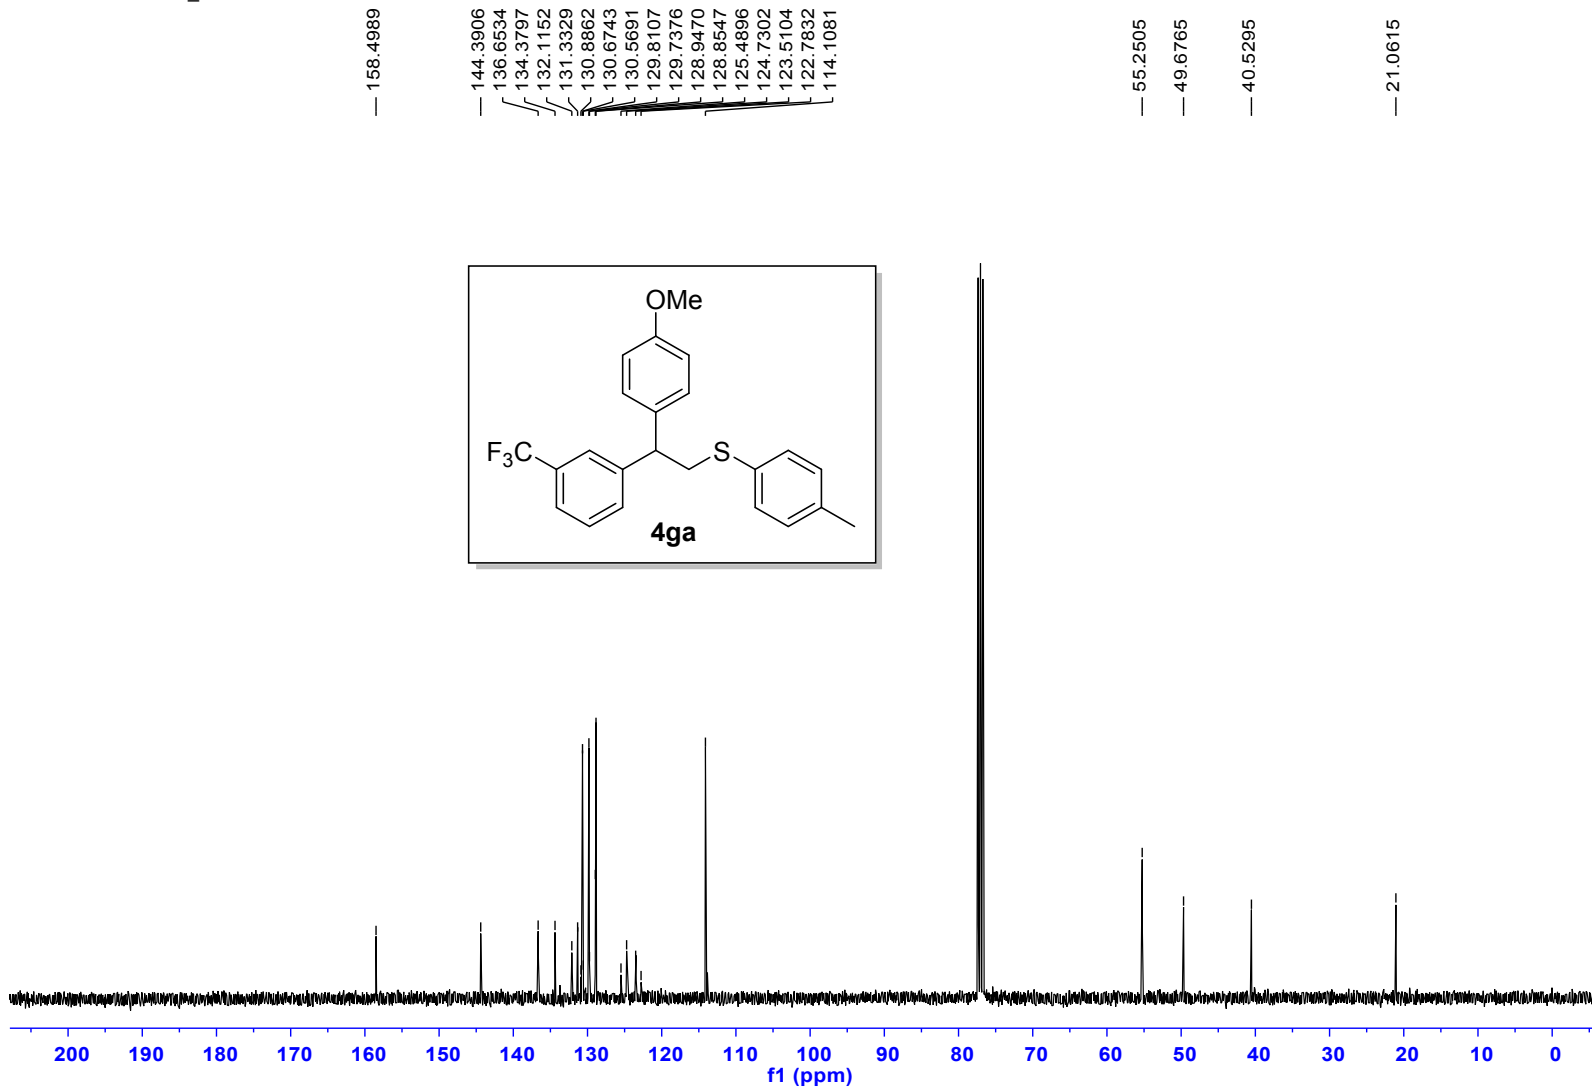

-62.3071

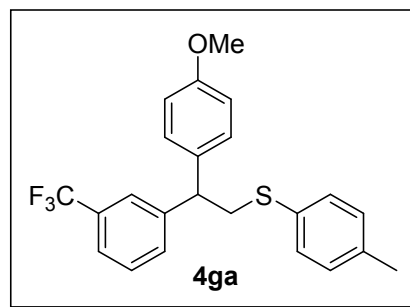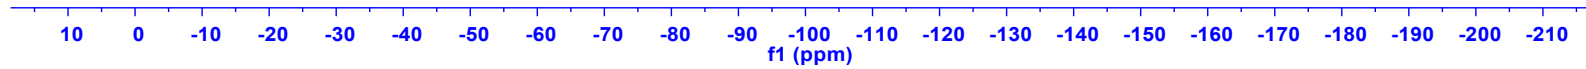



7.3002  
7.2807  
7.2201  
7.2018  
7.1827  
7.1297  
7.1093  
7.0883  
7.0688  
6.8328  
6.8123

4.5277  
4.1415  
4.1218  
4.1024  
3.7503  
3.5079  
3.4884

2.3078

-0.0001

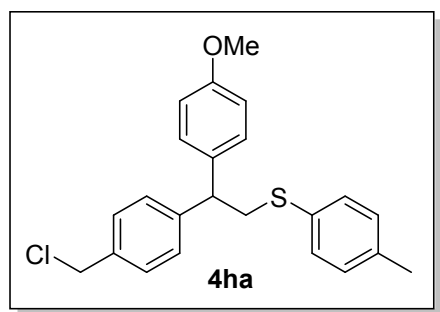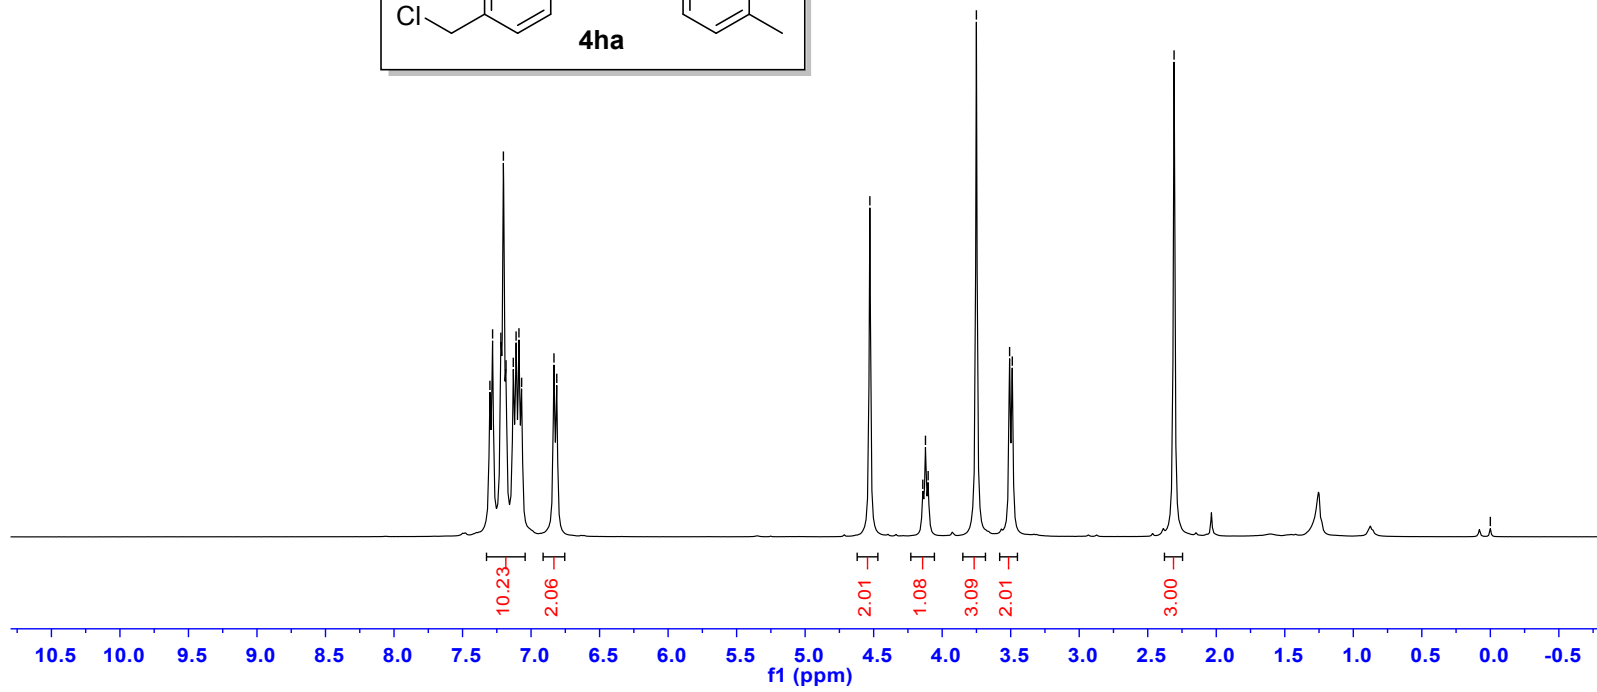

Dec04-2020-OSSO\_cj.10.fid — WYN-X201204-4

158.3776  
143.8888  
136.3735  
135.7228  
134.9622  
132.5770  
130.3491  
129.7895  
128.9155  
128.8522  
128.2800  
114.0133

55.2682  
49.5361  
46.0863  
40.4974

21.0983

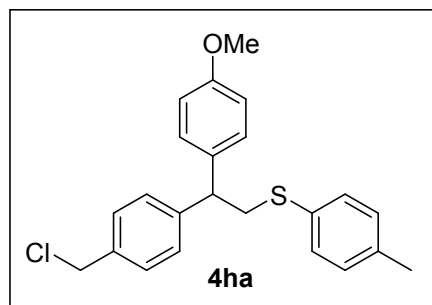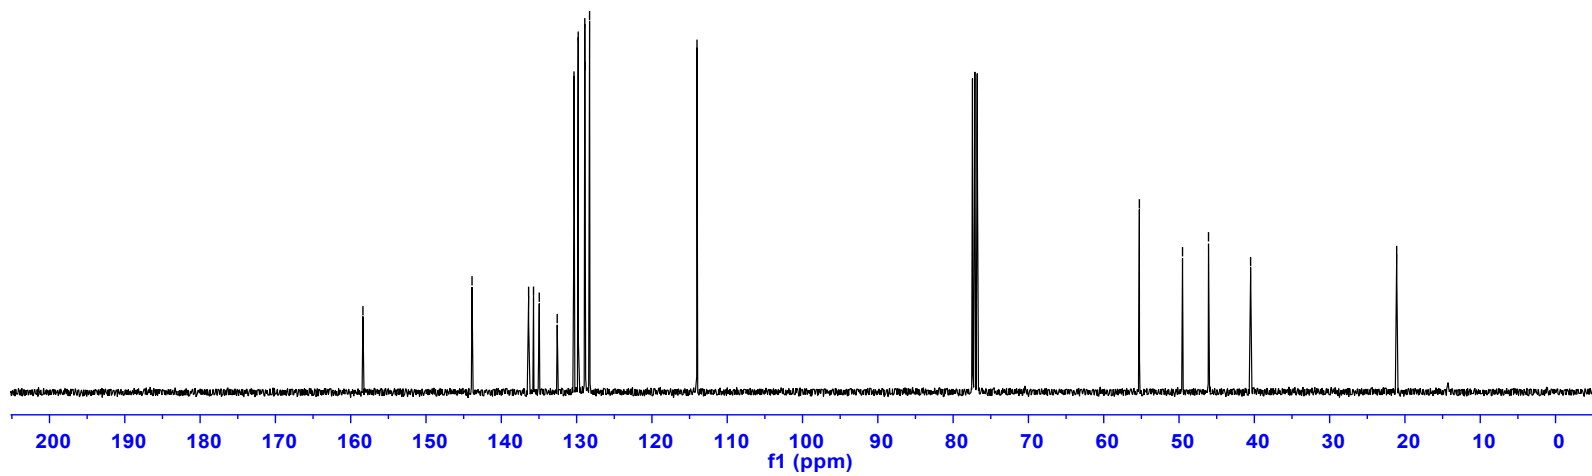

Dec02-2020-OSSO\_cj.29.fid — WYN-X201202-1

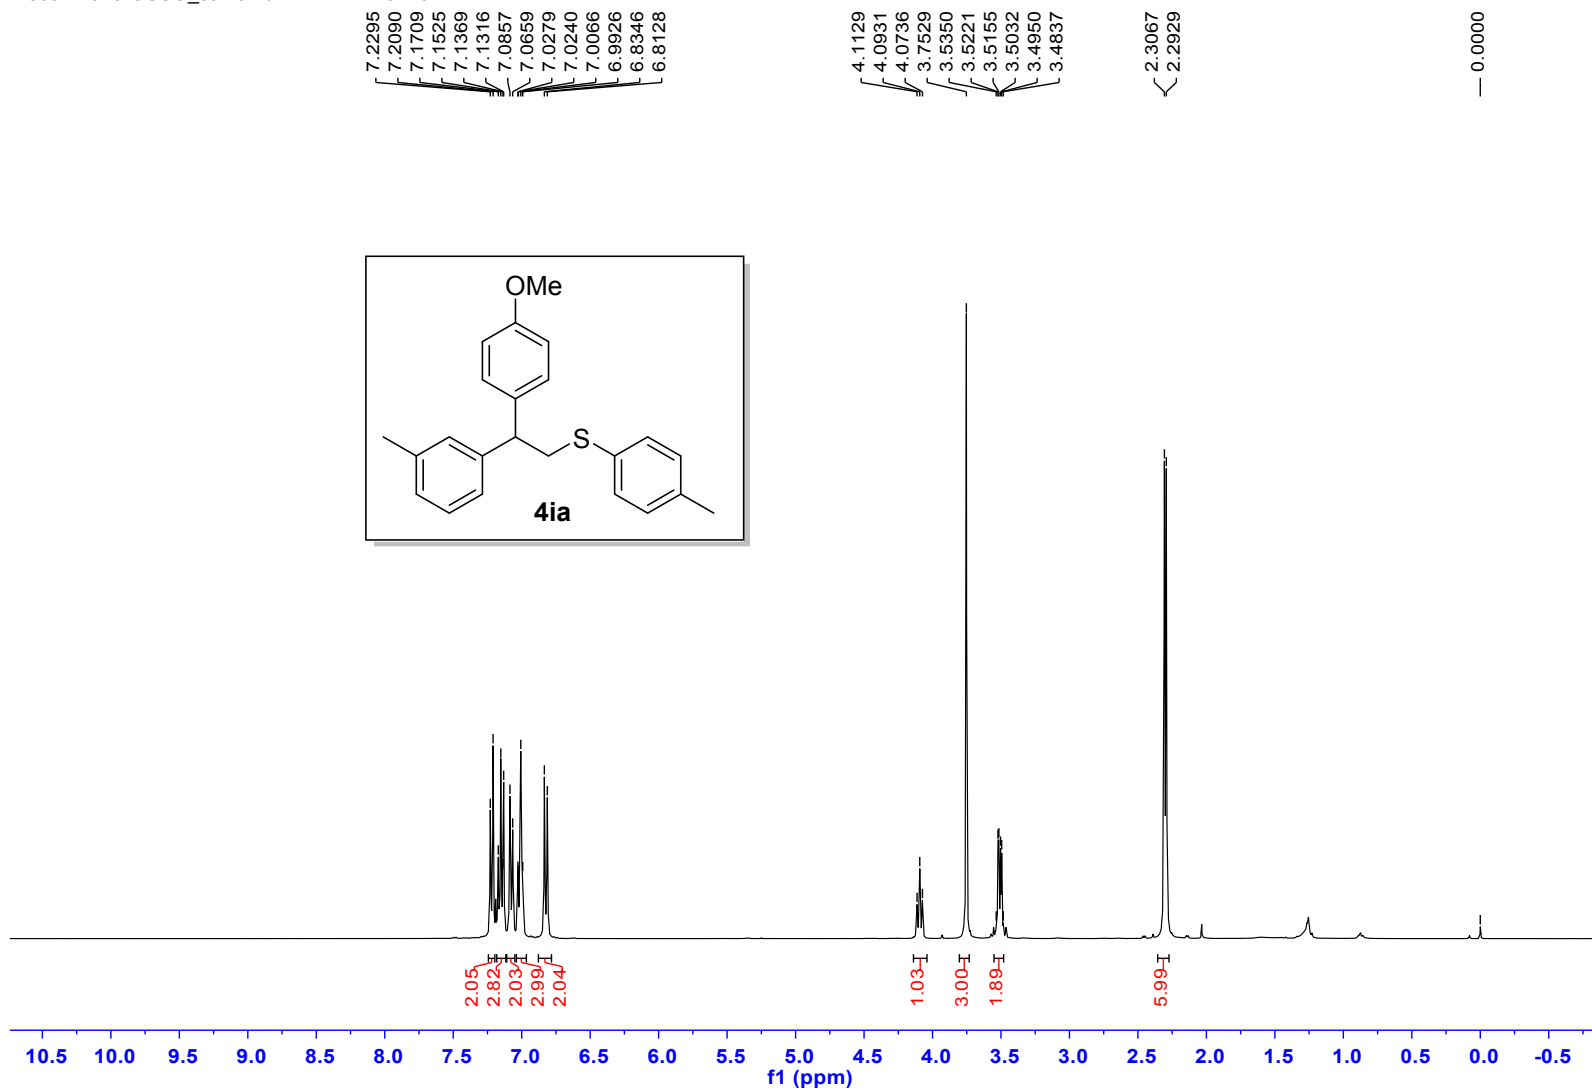

Dec04-2020-OSSO\_cj.11.fid — WYN-X201204-5

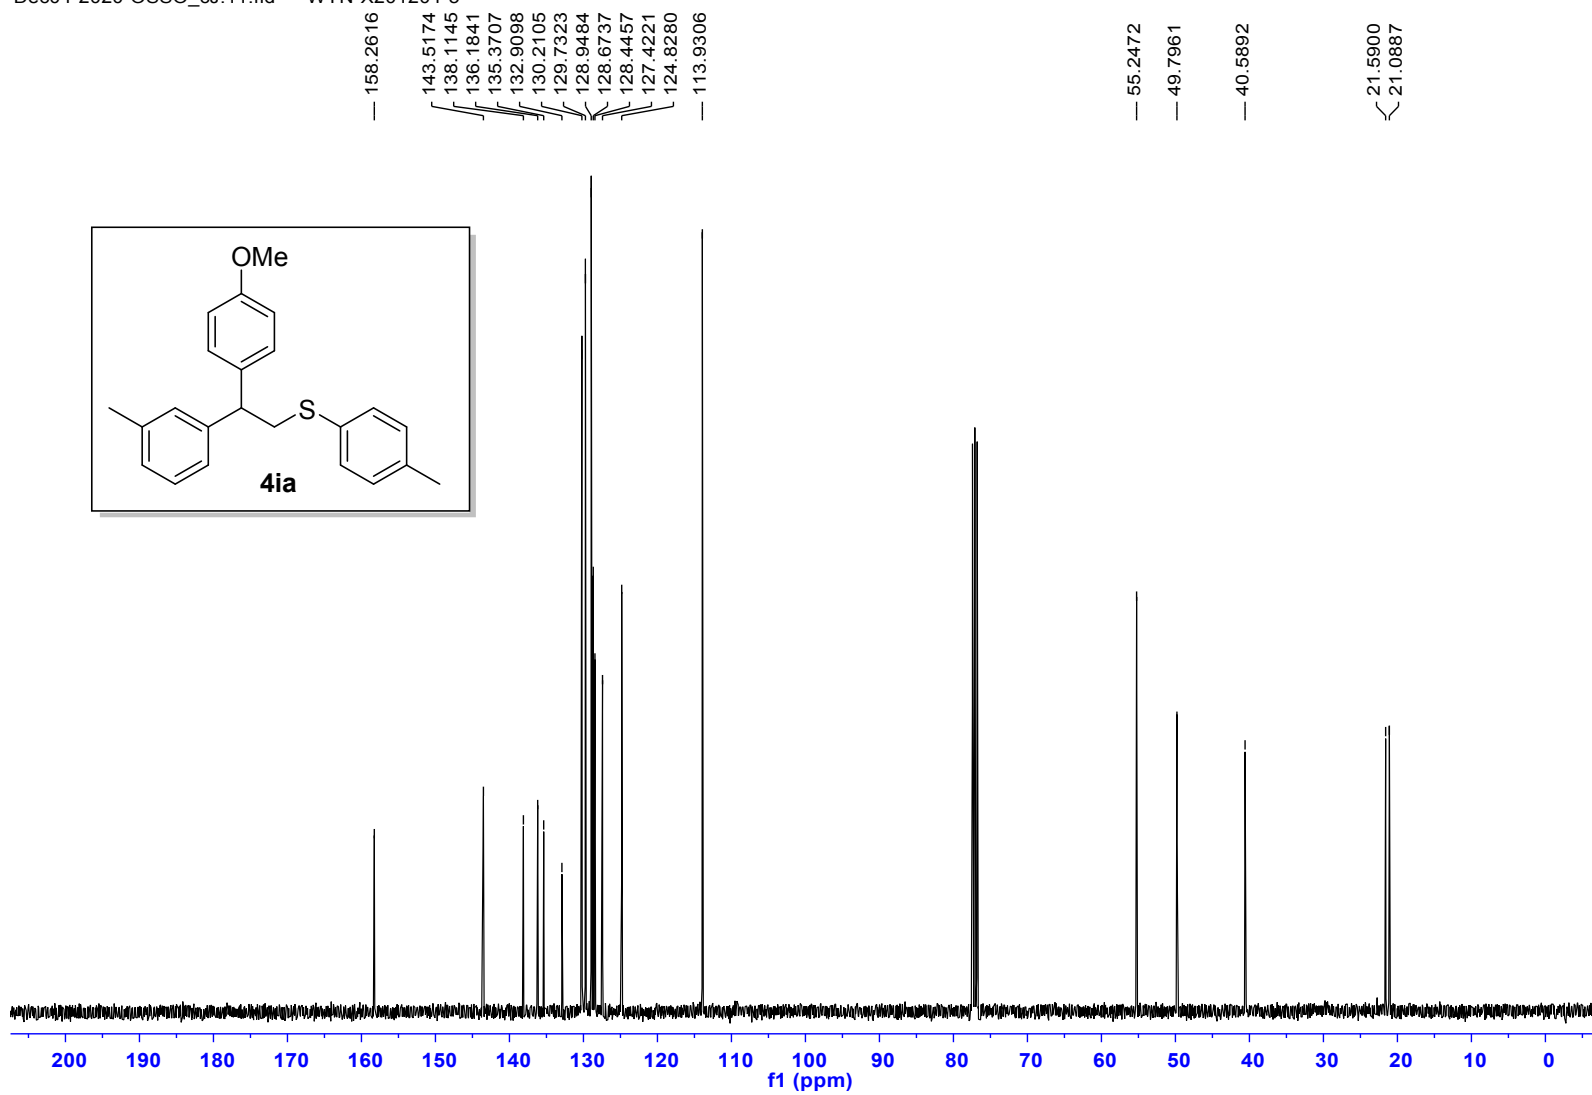

Dec04-2020-OSSO\_cj.7.fid — WYN-X201204-2

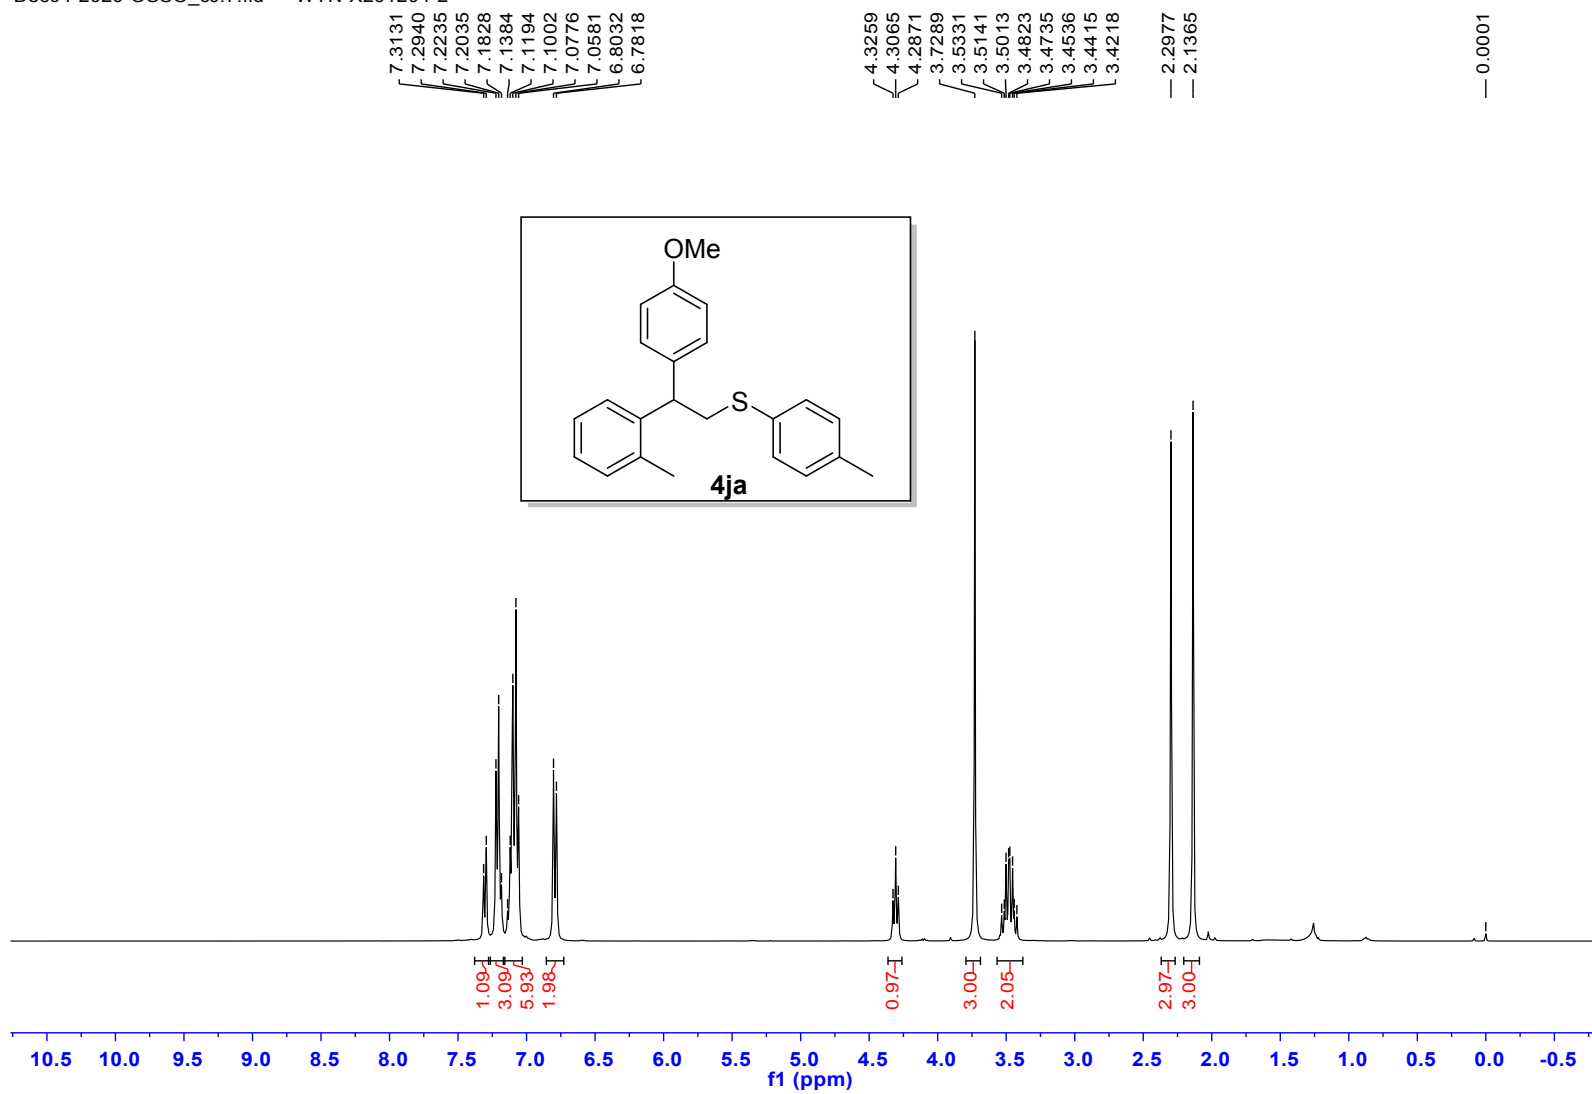

Dec04-2020-OSSO\_cj.8.fid — WYN-X201204-2-C

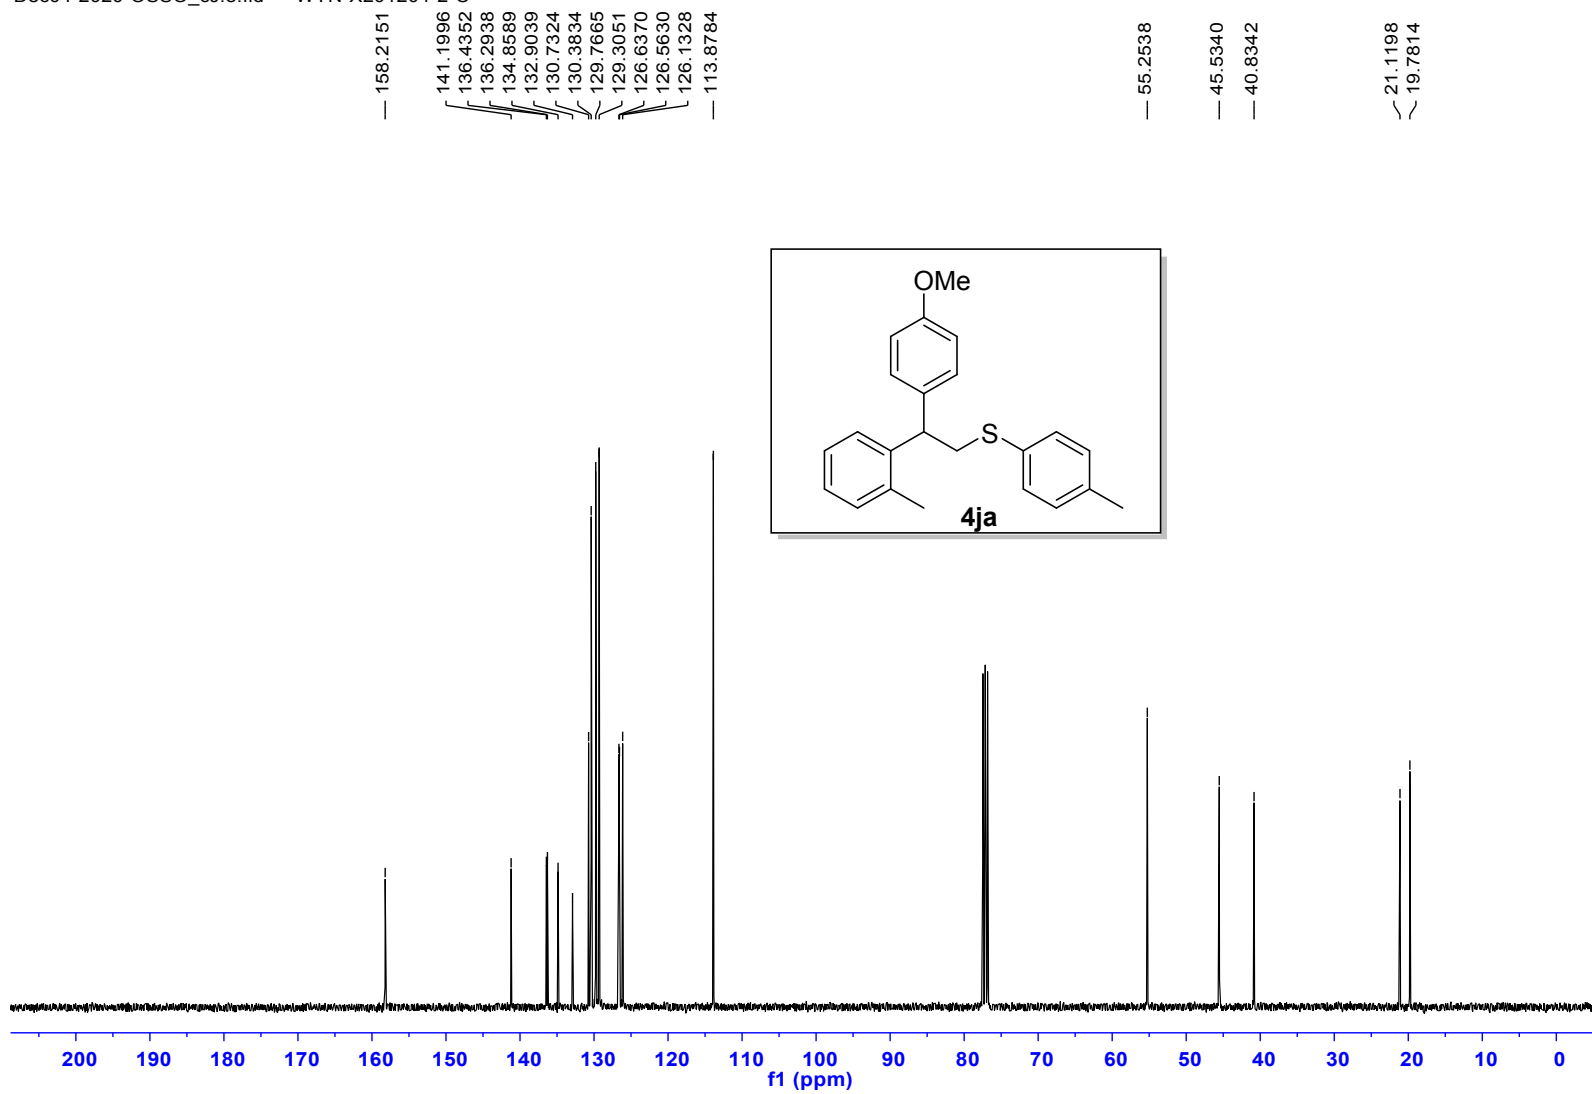

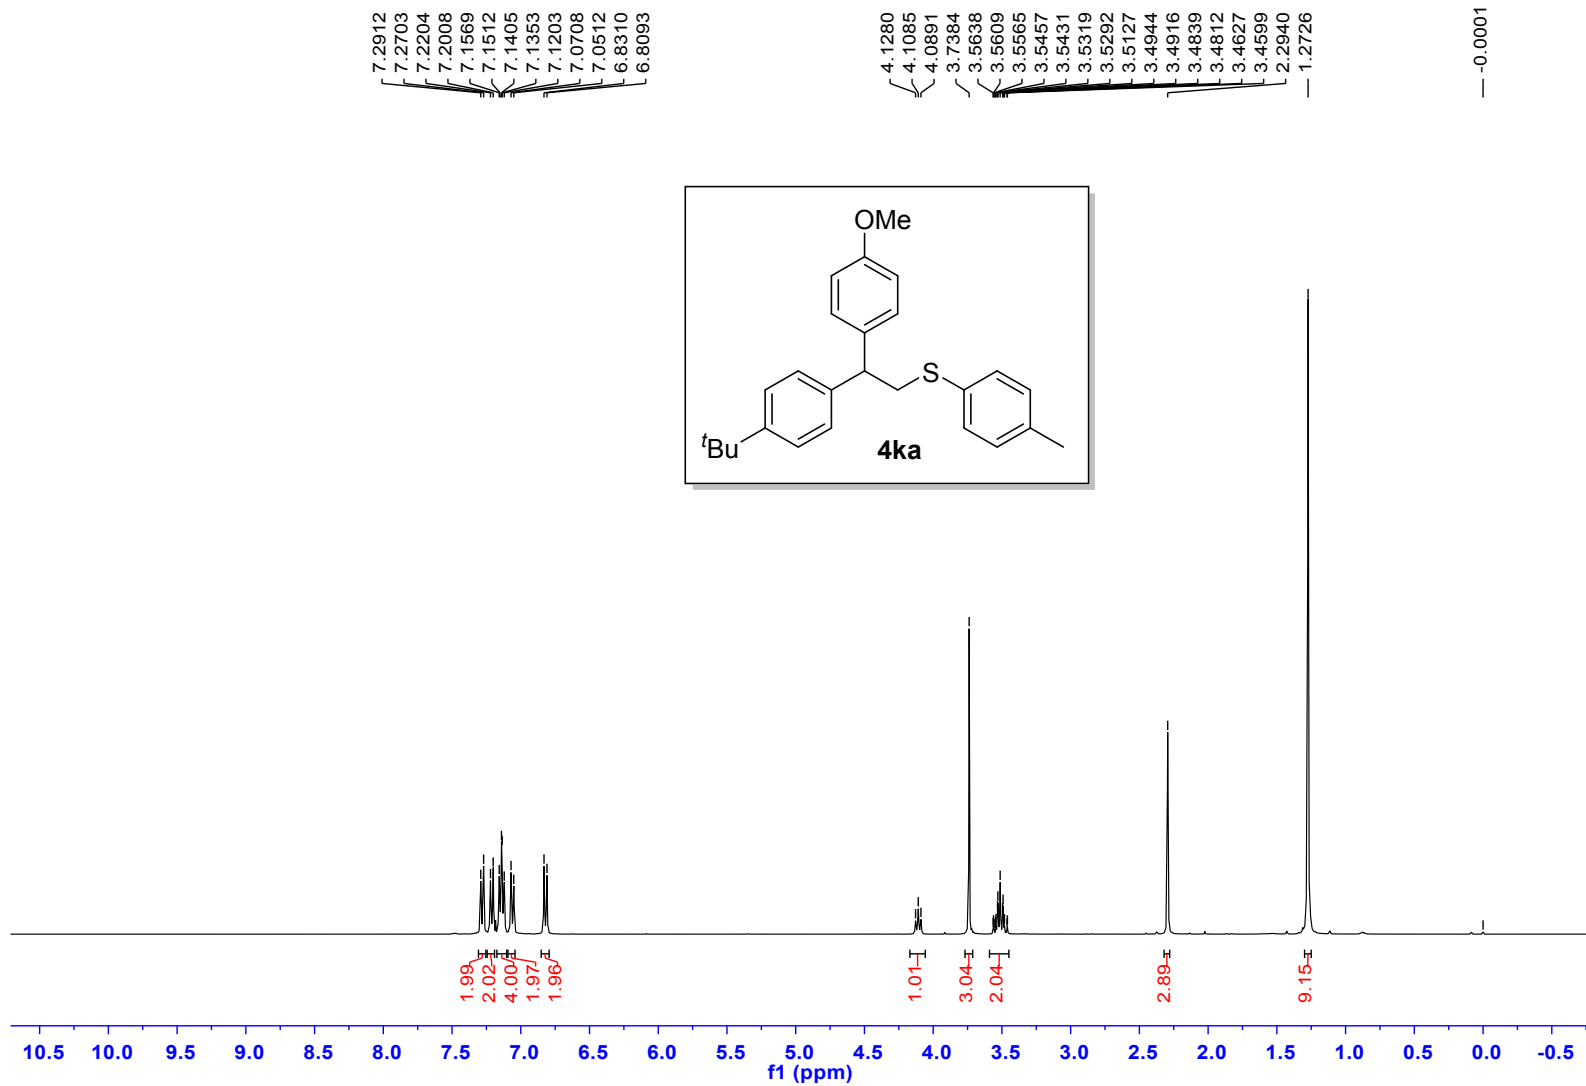

Oct27-2020-OSSO\_cJ.21.fid — WYN-X201027-3

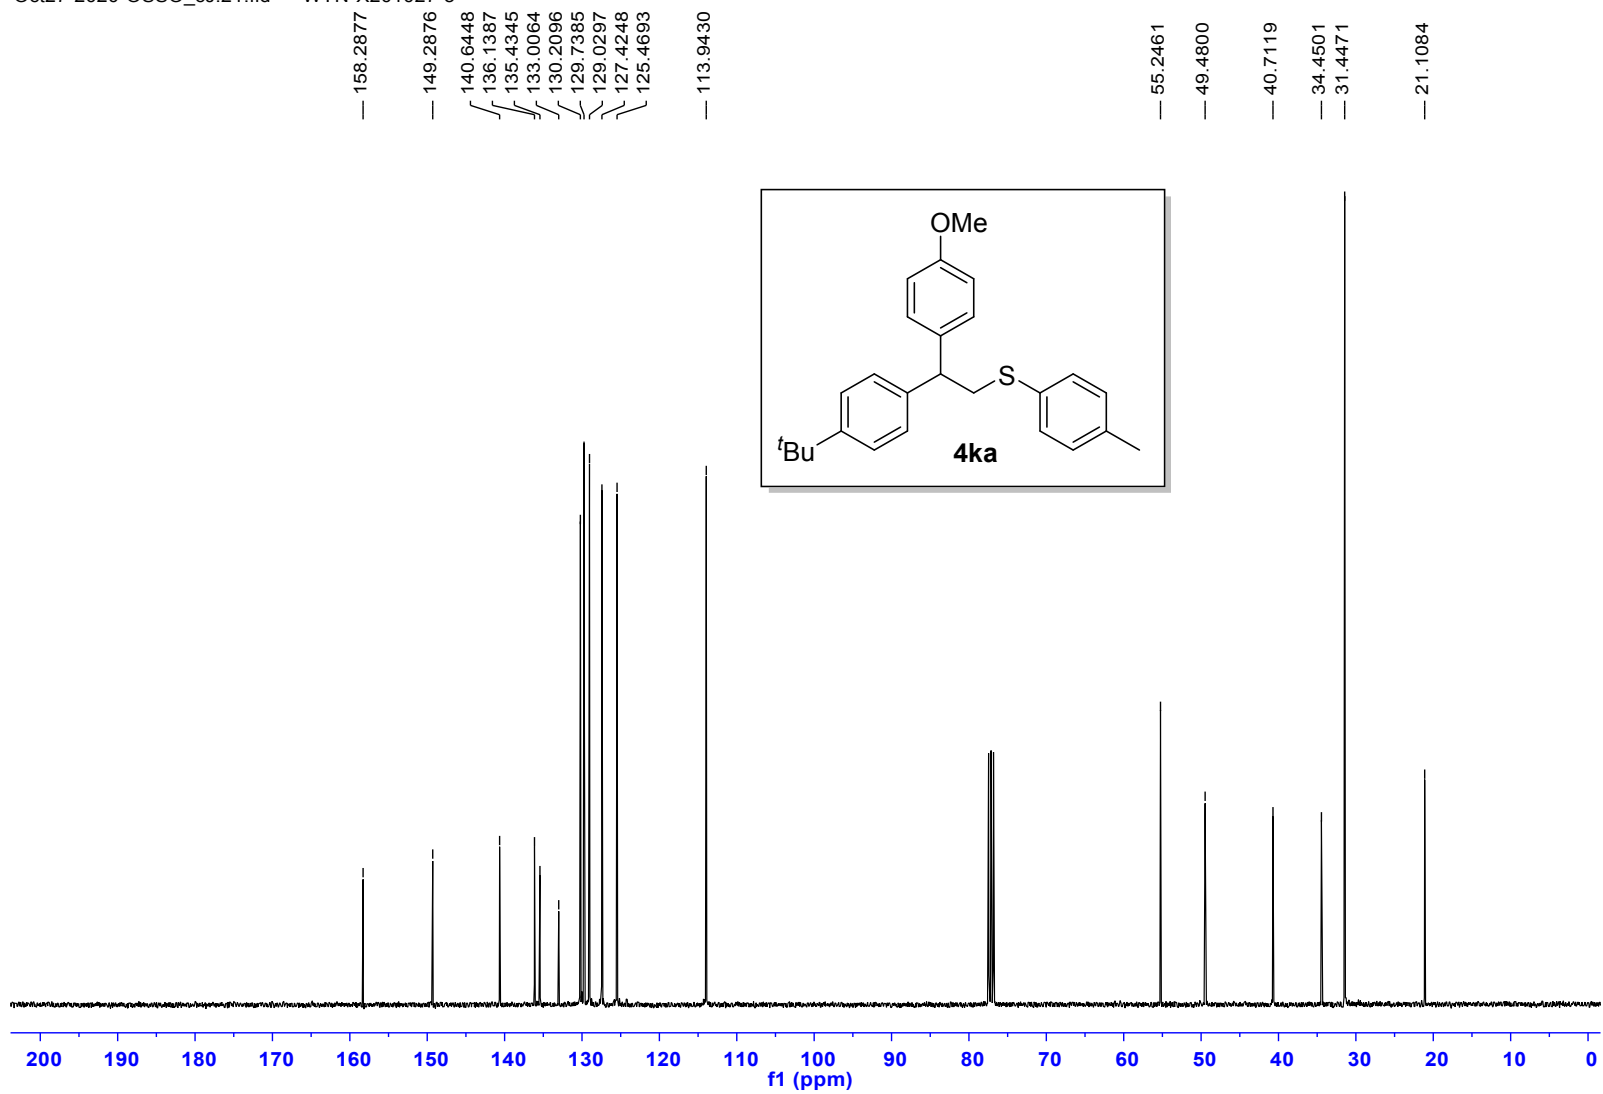



Nov27-2020-OSSO\_cj.21.fid — WYN-X201127-8

7.2983  
7.2851  
7.2769  
7.2637  
7.2594  
7.2058  
7.1889  
7.1395  
7.1178  
6.9809  
6.9593  
6.9376  
6.8356  
6.8138

4.1206  
4.1009  
4.0812  
3.7516  
3.5105  
3.4908

0.0000

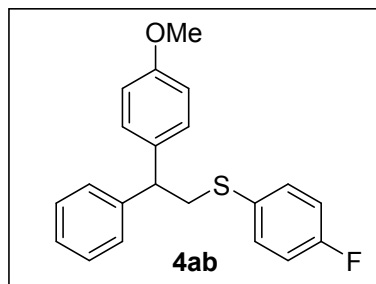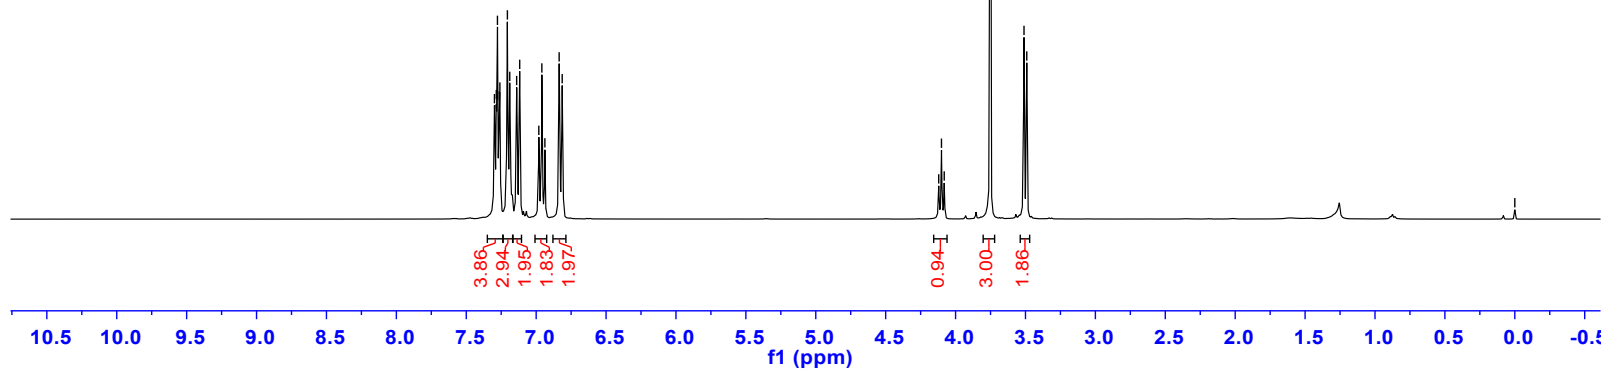

Nov30-2020-OSSO\_cj.14.fid — WYN-X201130-6

163.0374  
160.5883  
158.3653  
143.3567  
135.0274  
132.6101  
132.5302  
131.4227  
131.3898  
128.9365  
128.6154  
127.8547  
126.7088  
116.1628  
115.9443  
113.9913

55.2547  
49.9211  
41.2526

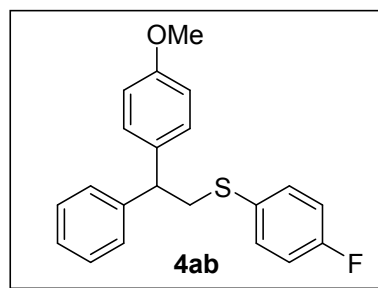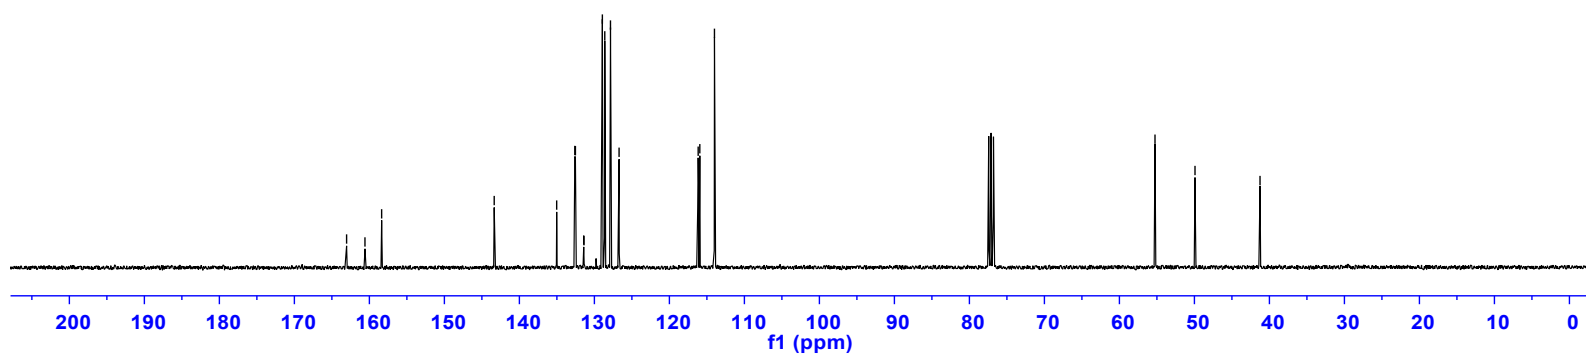

— -115.3845

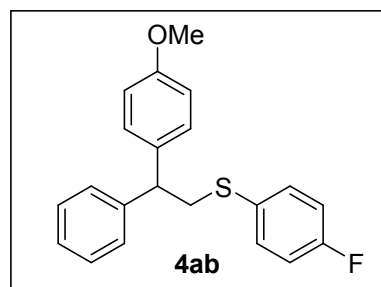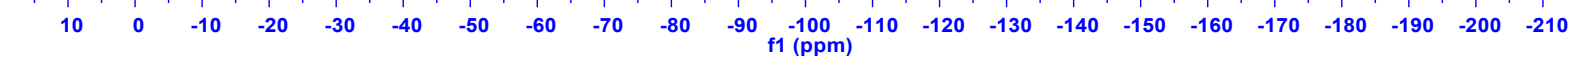

Nov12-2020-OSSO\_cj.14.fid — WYN-X201112-11

7.2989  
7.2852  
7.2807  
7.2778  
7.2684  
7.2612  
7.2277  
7.2110  
7.2052  
7.2011  
7.1924  
7.1781  
7.1745  
7.1417  
7.1201  
6.8337  
6.8121

4.1444  
4.1247  
4.1051  
3.7468  
3.5310  
3.5111

— 0.0001

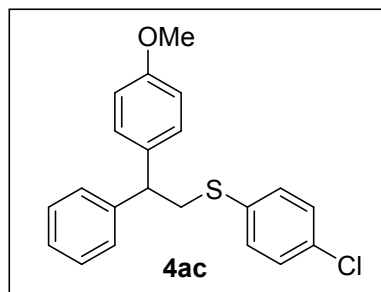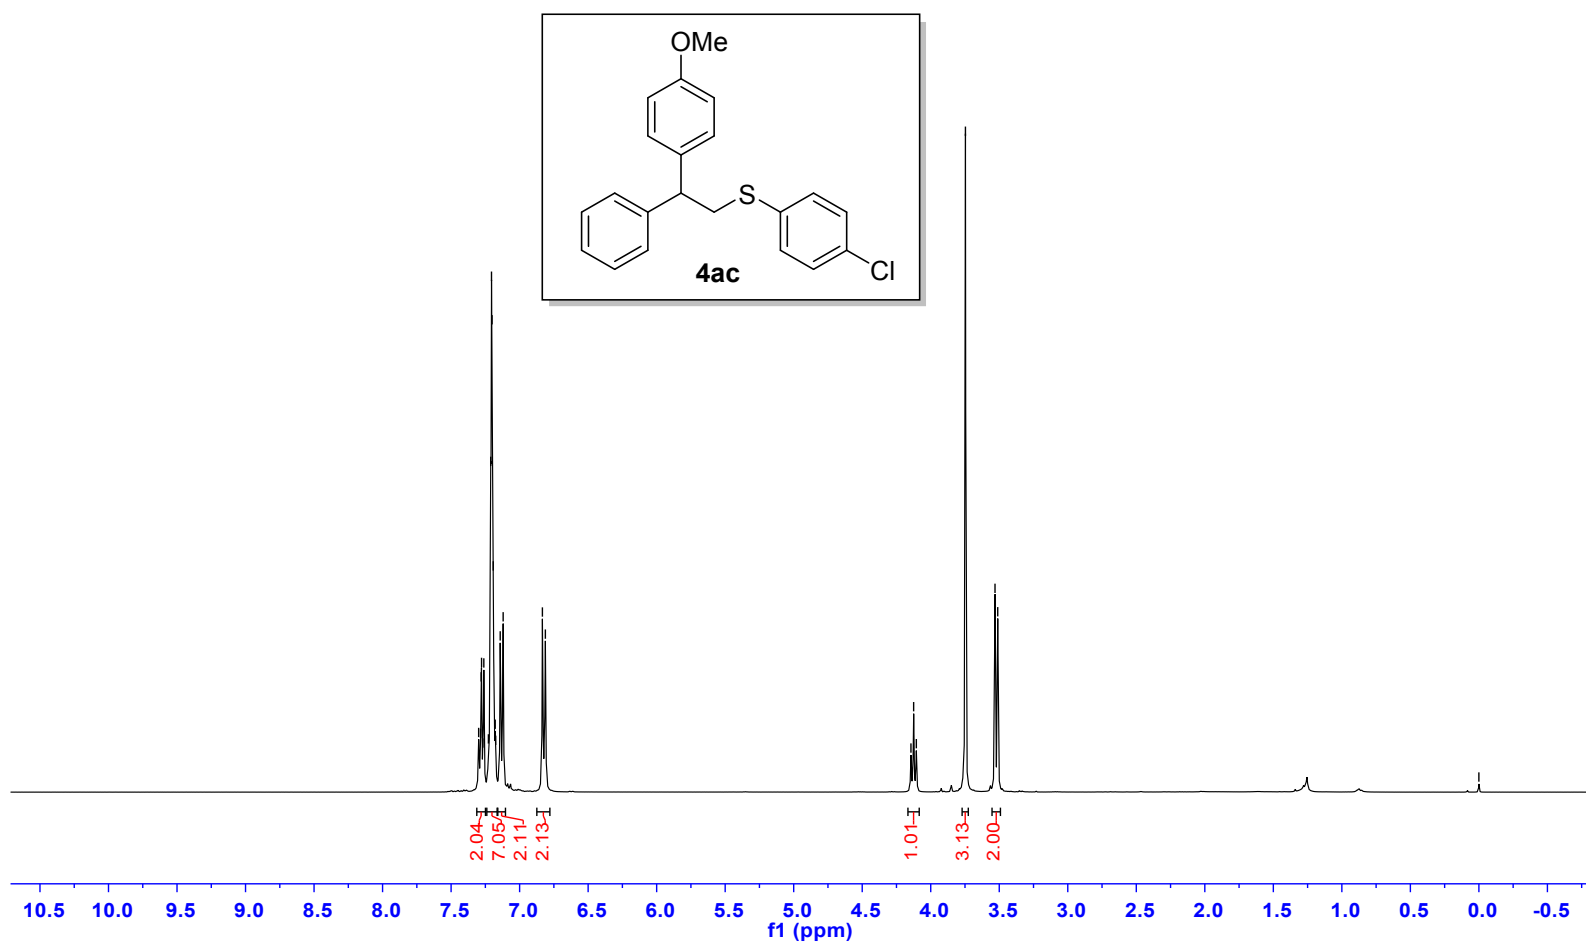

Nov13-2020-OSSO\_cj.30.fid — WYN-X201112-11-C

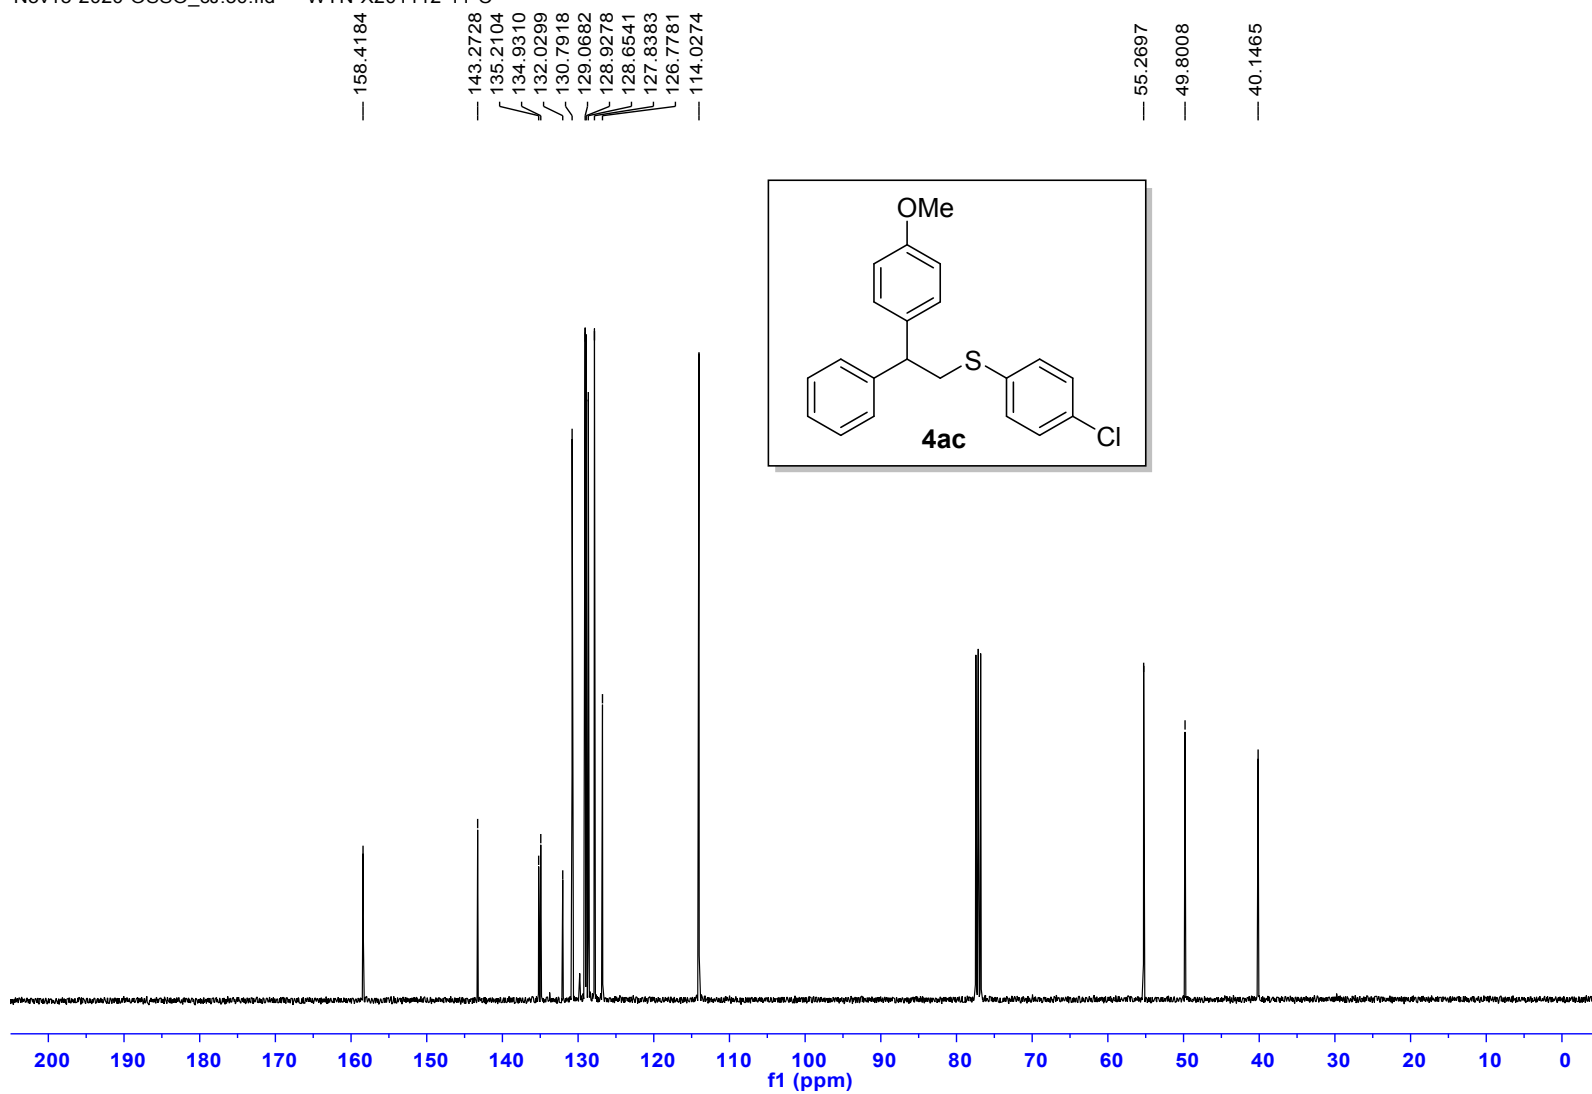

Nov16-2020-OSSO\_CJ.3.fid — WYN-X201116-1

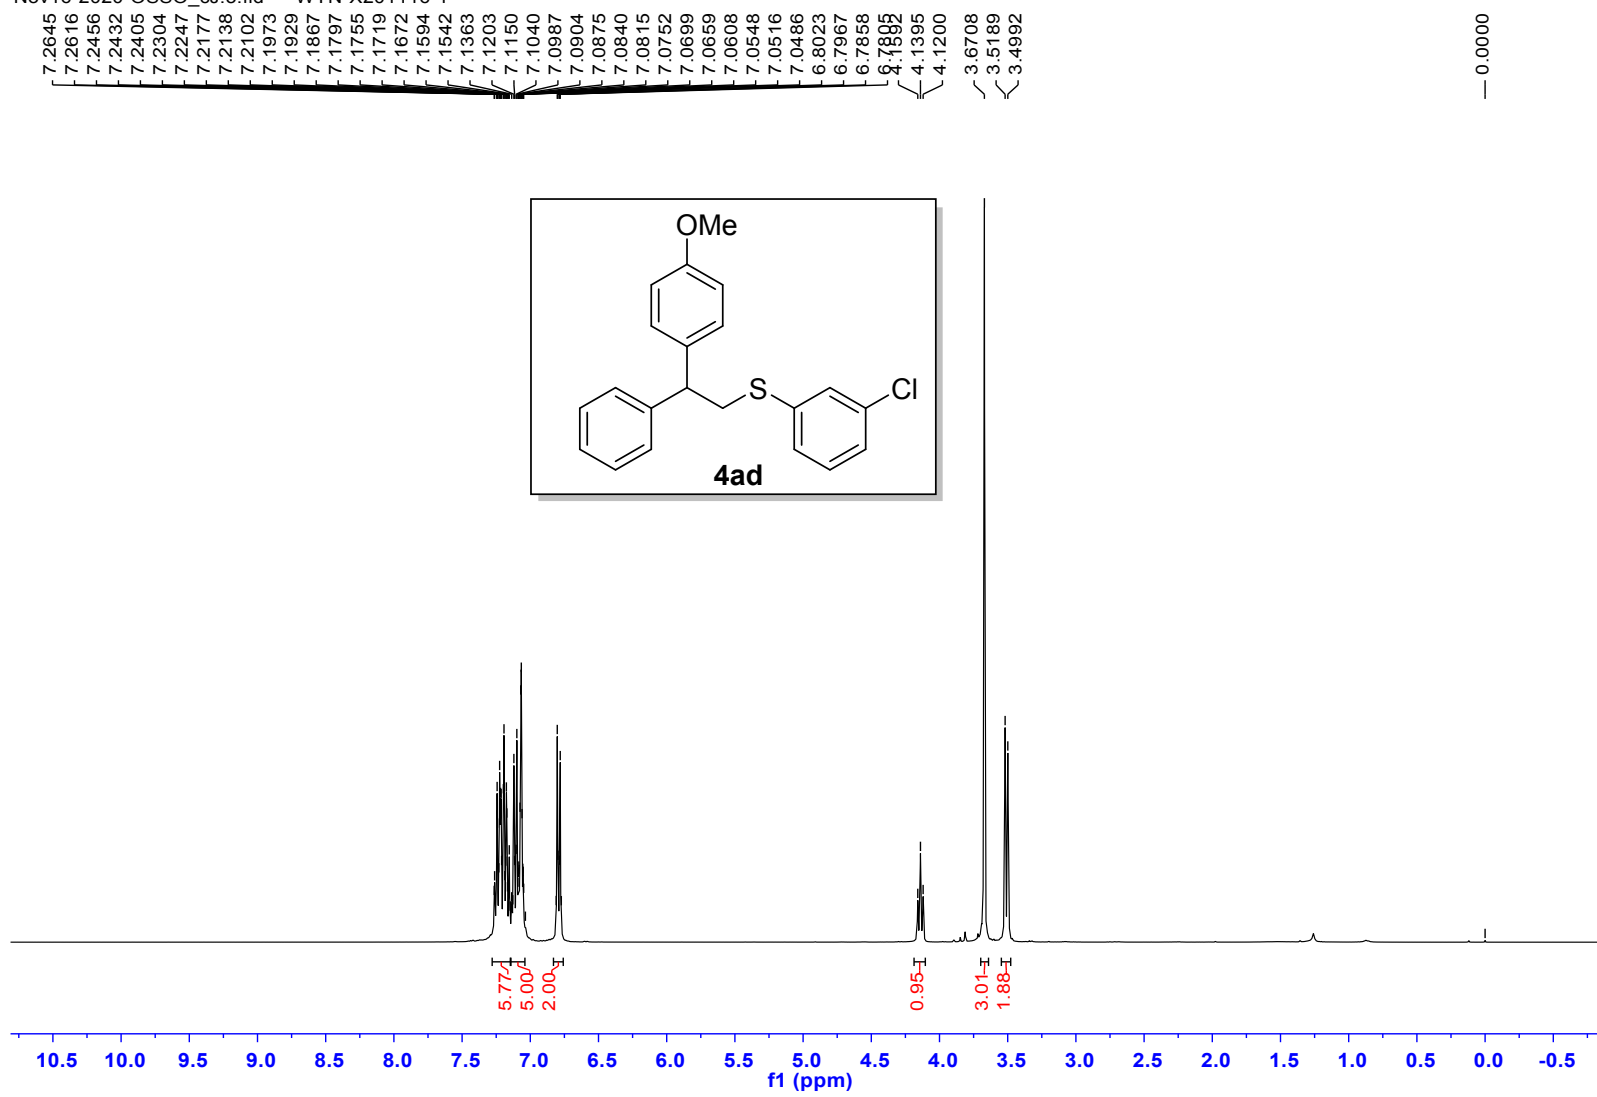

Nov16-2020-OSSO\_cj.33.fid — WYN-X201116-1-C

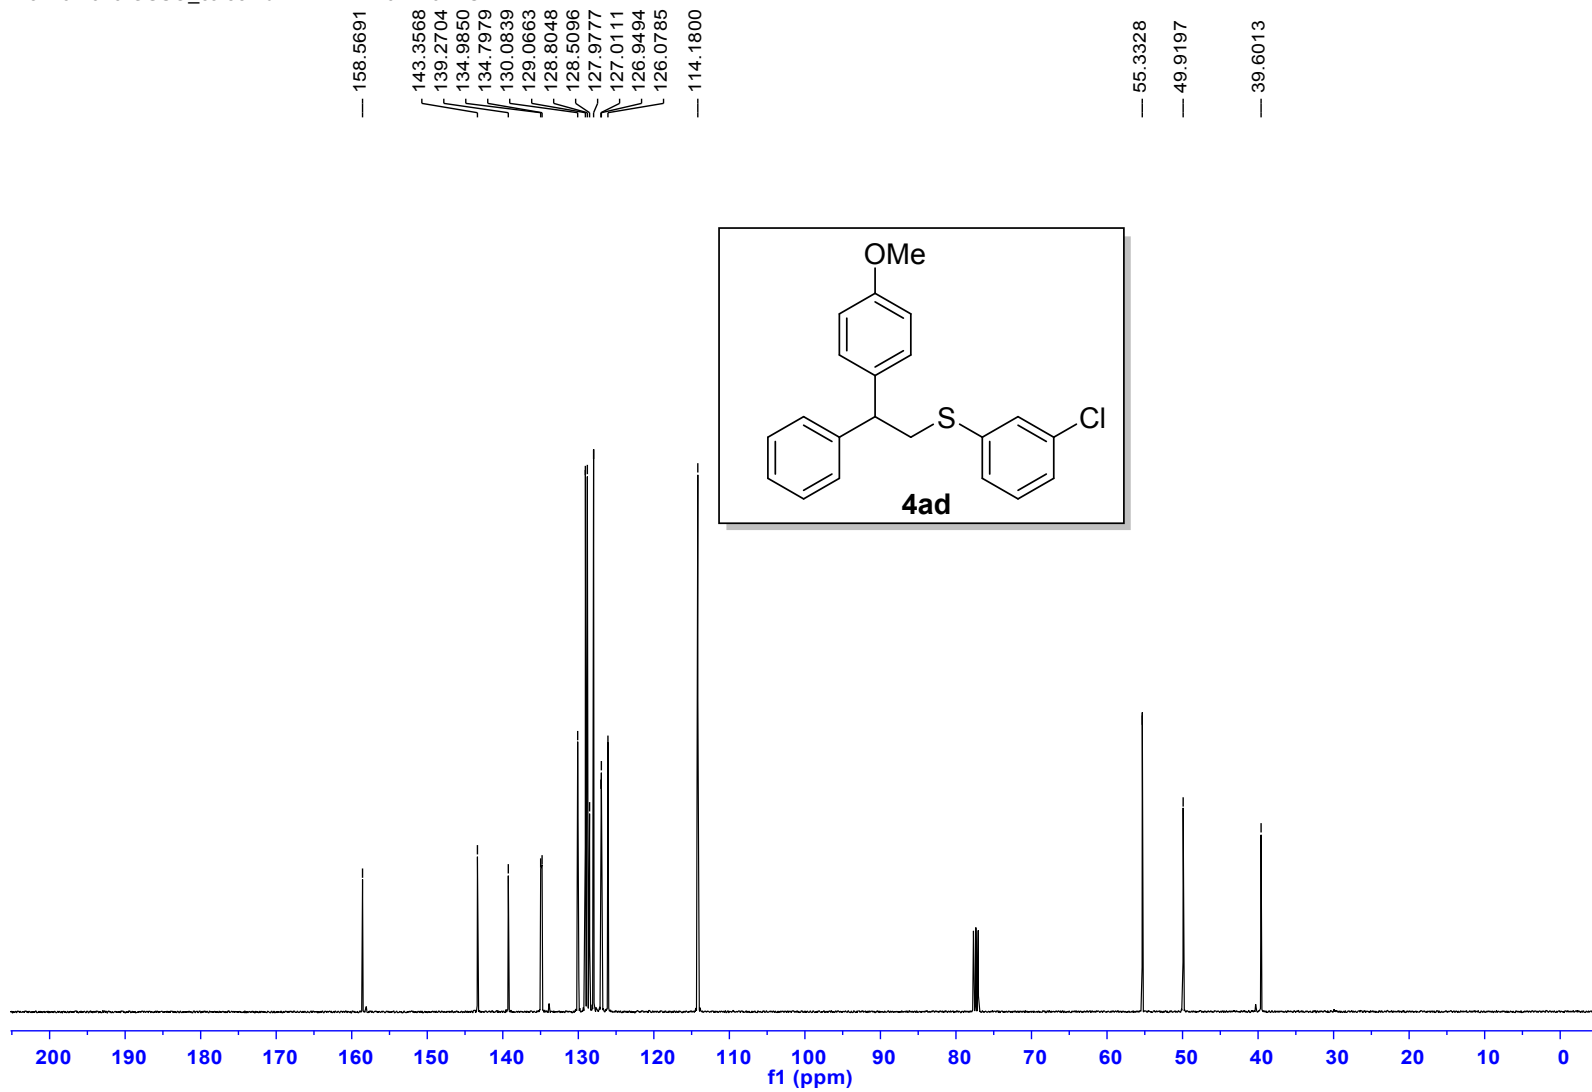

Nov16-2020-OSSO\_CJ.4.fid — WYN-X201116-2

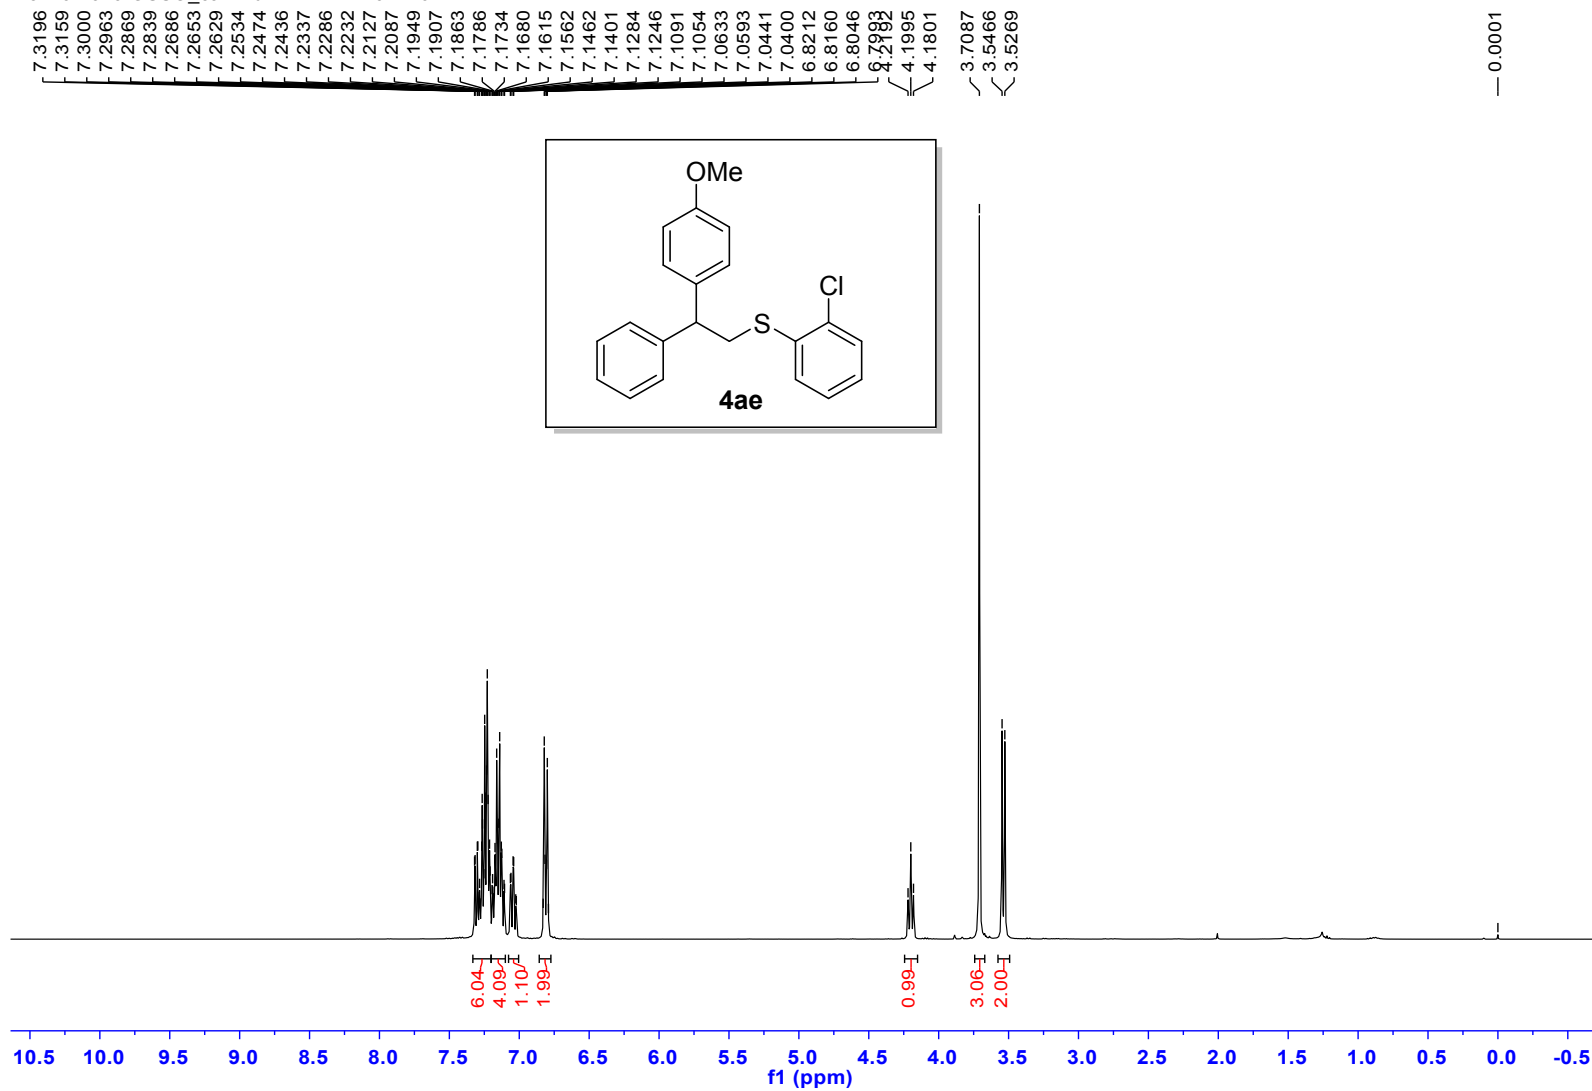



Nov16-2020-OSSO\_cj.34.fid — WYN-X201116-2-C

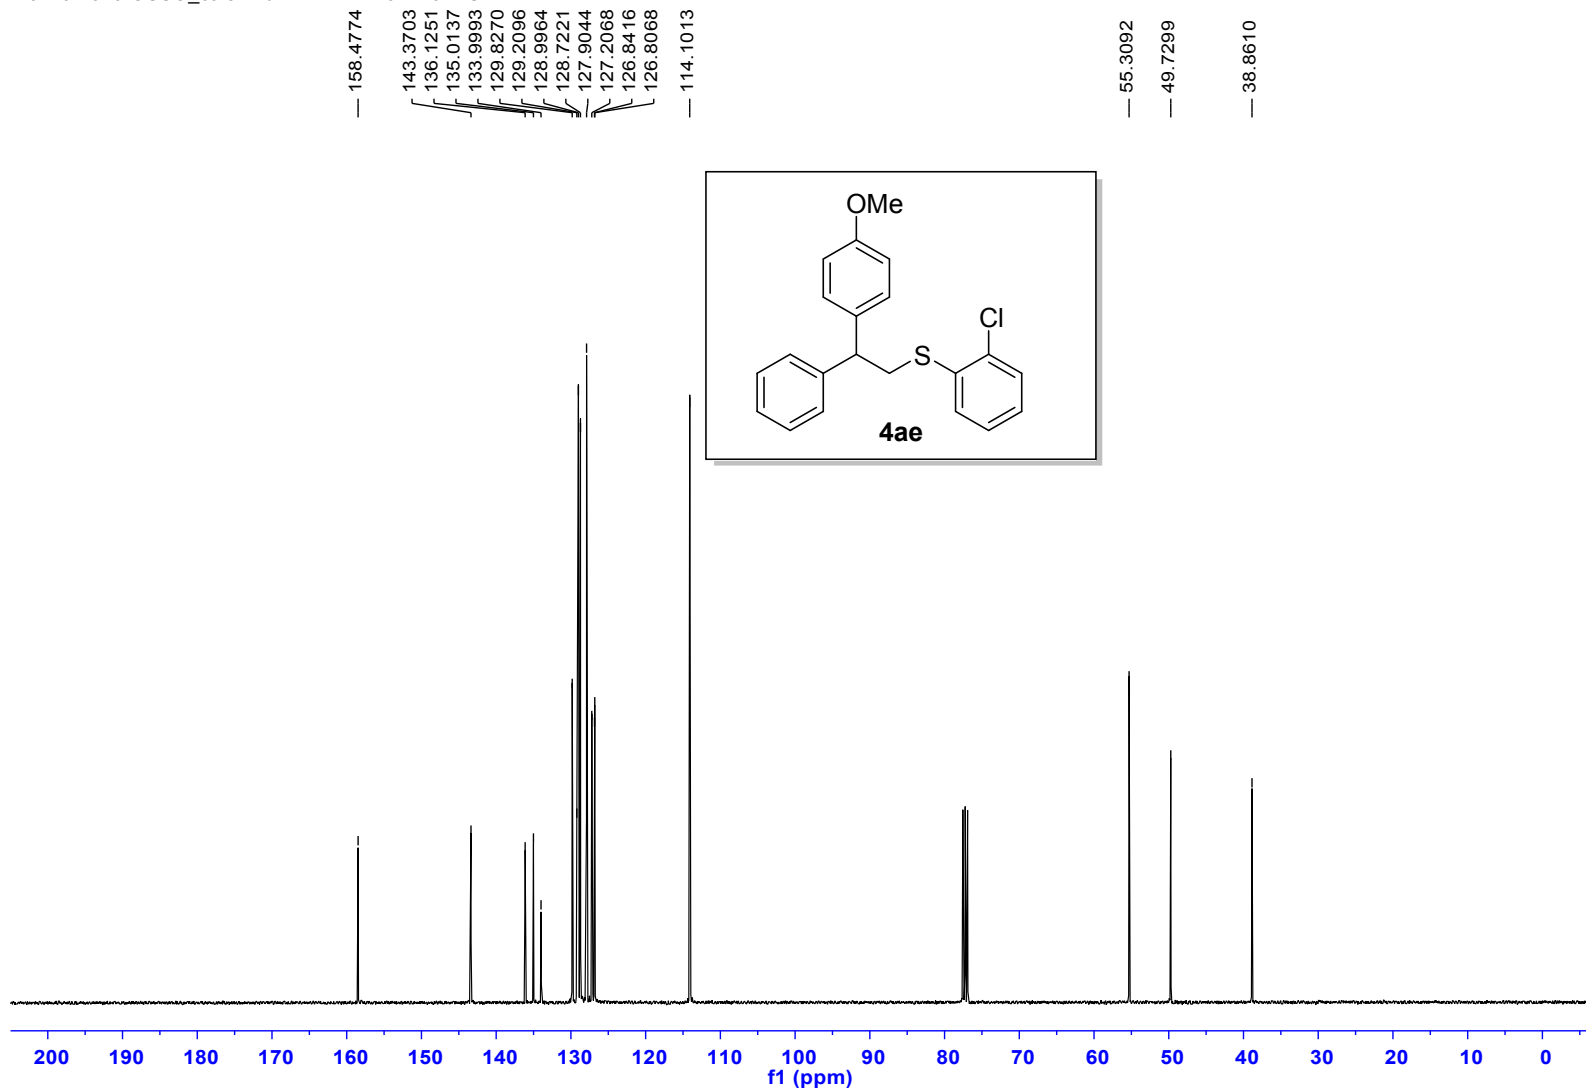

Sep21-2020-OSSO\_cj.39.fid — WYN-X200921-1

7.3207  
7.2997  
7.2657  
7.2467  
7.2288  
7.2183  
7.1866  
7.1795  
7.1742  
7.1675  
7.1592  
7.1514  
7.1410  
7.1137  
7.0918  
7.0704  
6.8041  
6.7829

4.1294  
4.1100  
4.0909  
3.6850  
3.4976  
3.4779

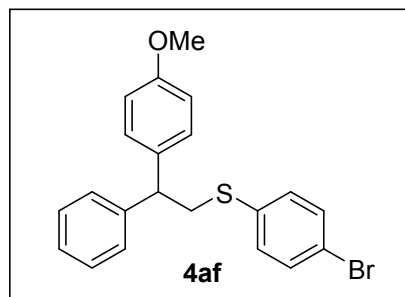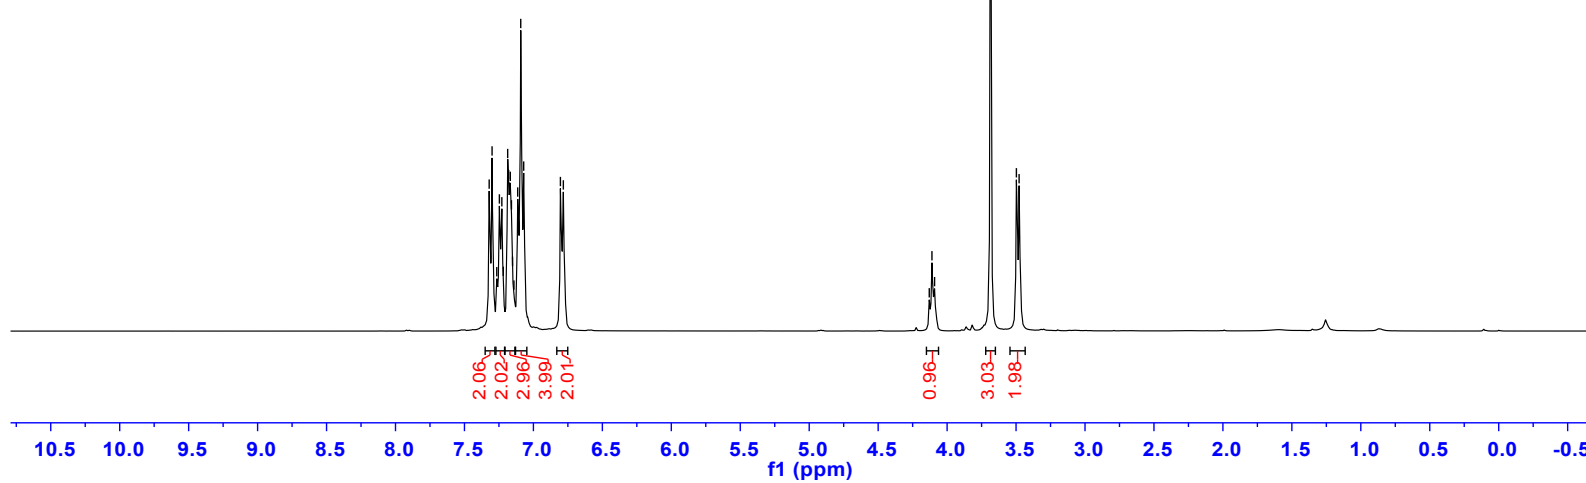

Sep22-2020-osso-cj.3.fid — wyn-x200922-1-c

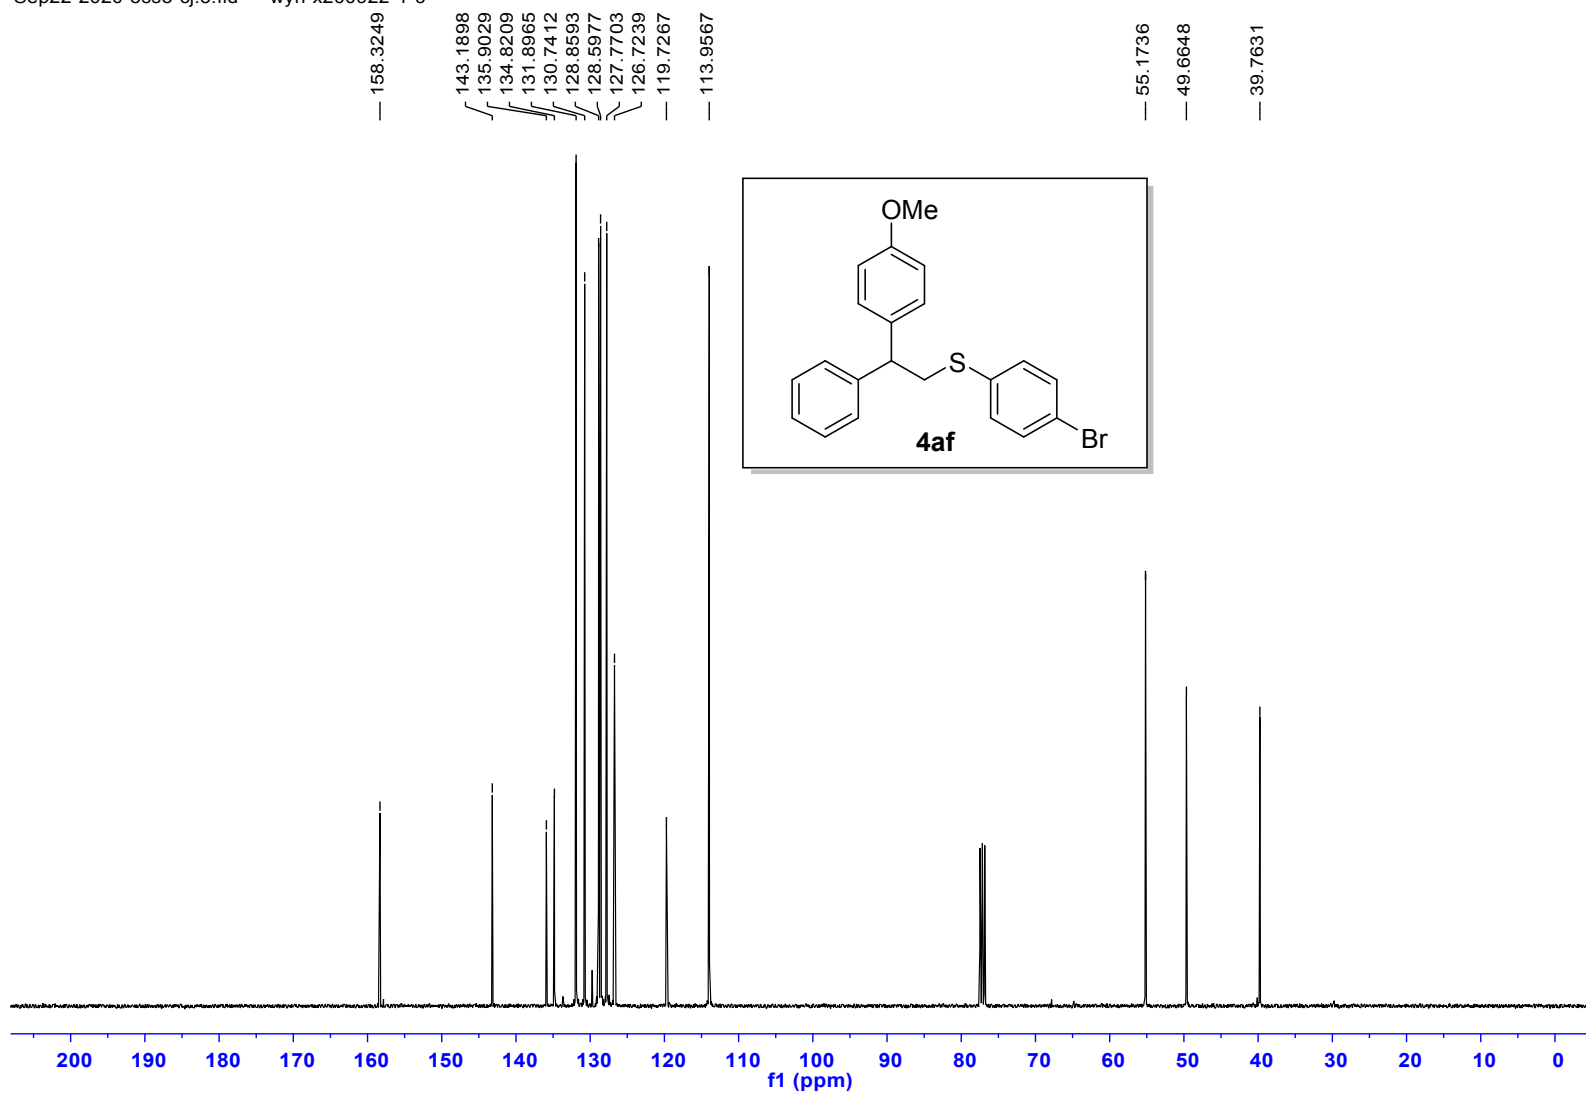

Nov12-2020-OSSO\_CJ.17.fid — WYN-X201112-14

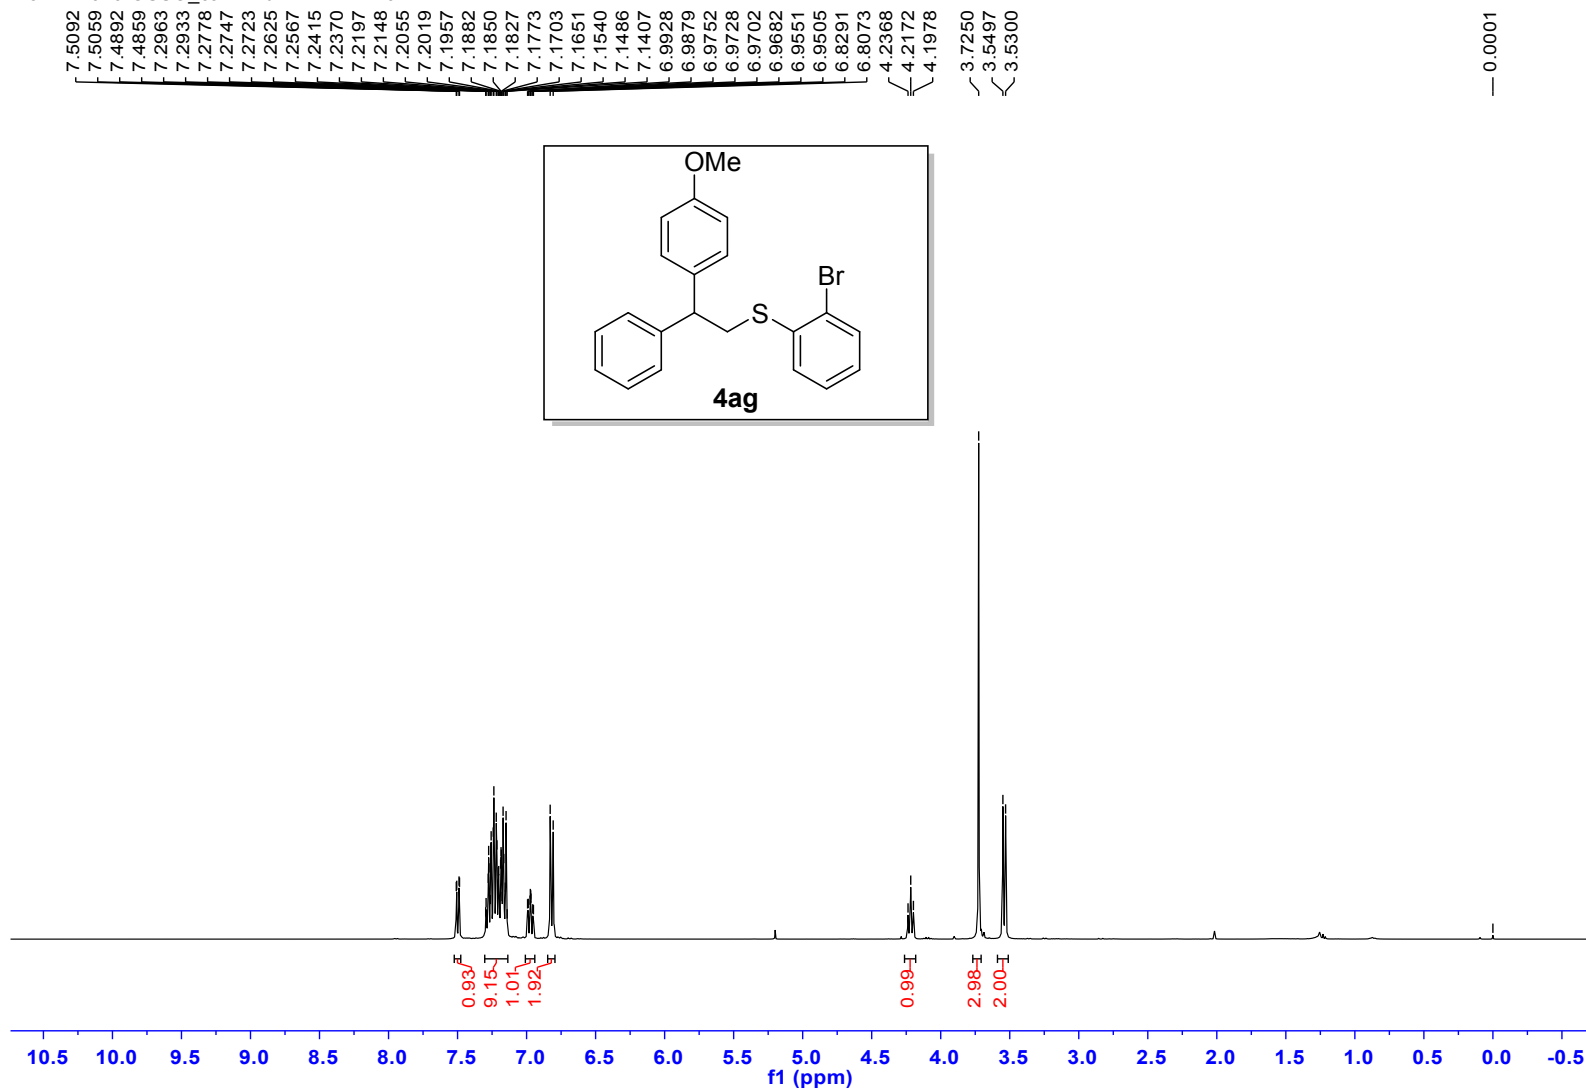

— 0.0001

Nov13-2020-OSSO\_cj.33.fid — WYN-X201112-14-C

— 158.4546  
143.3497  
138.1766  
134.9989  
133.1126  
128.9812  
128.9178  
128.7042  
127.8887  
127.8060  
126.8760  
126.8231  
124.1903  
— 114.0838

— 55.3091  
— 49.6004  
— 39.3133

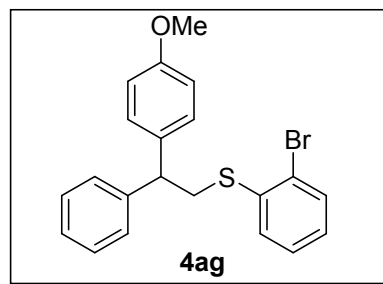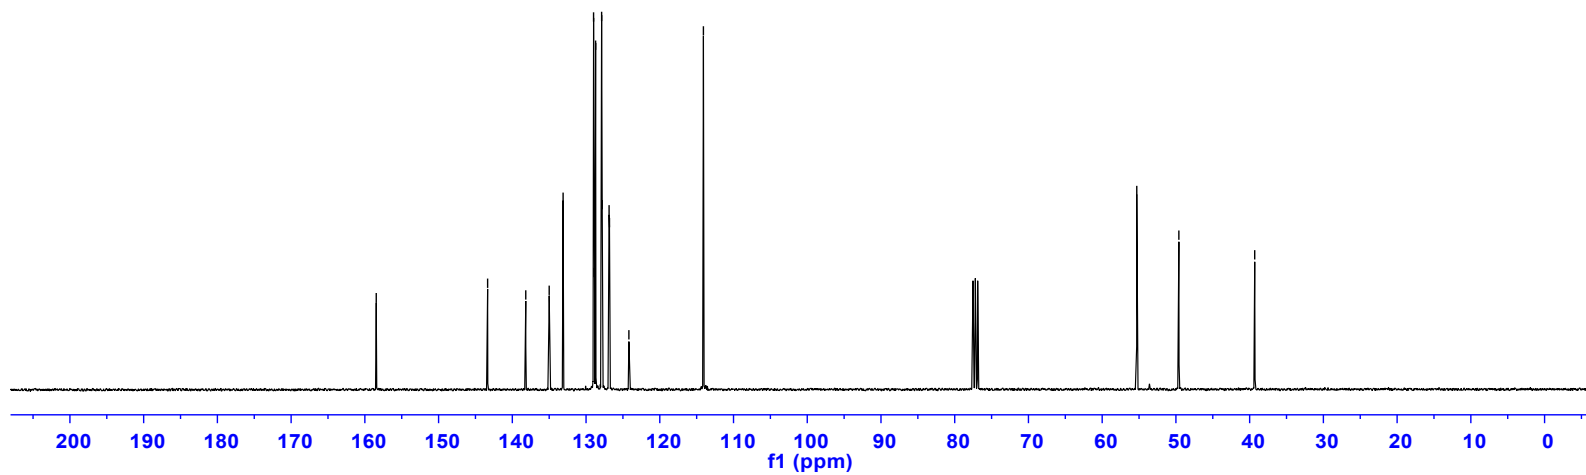

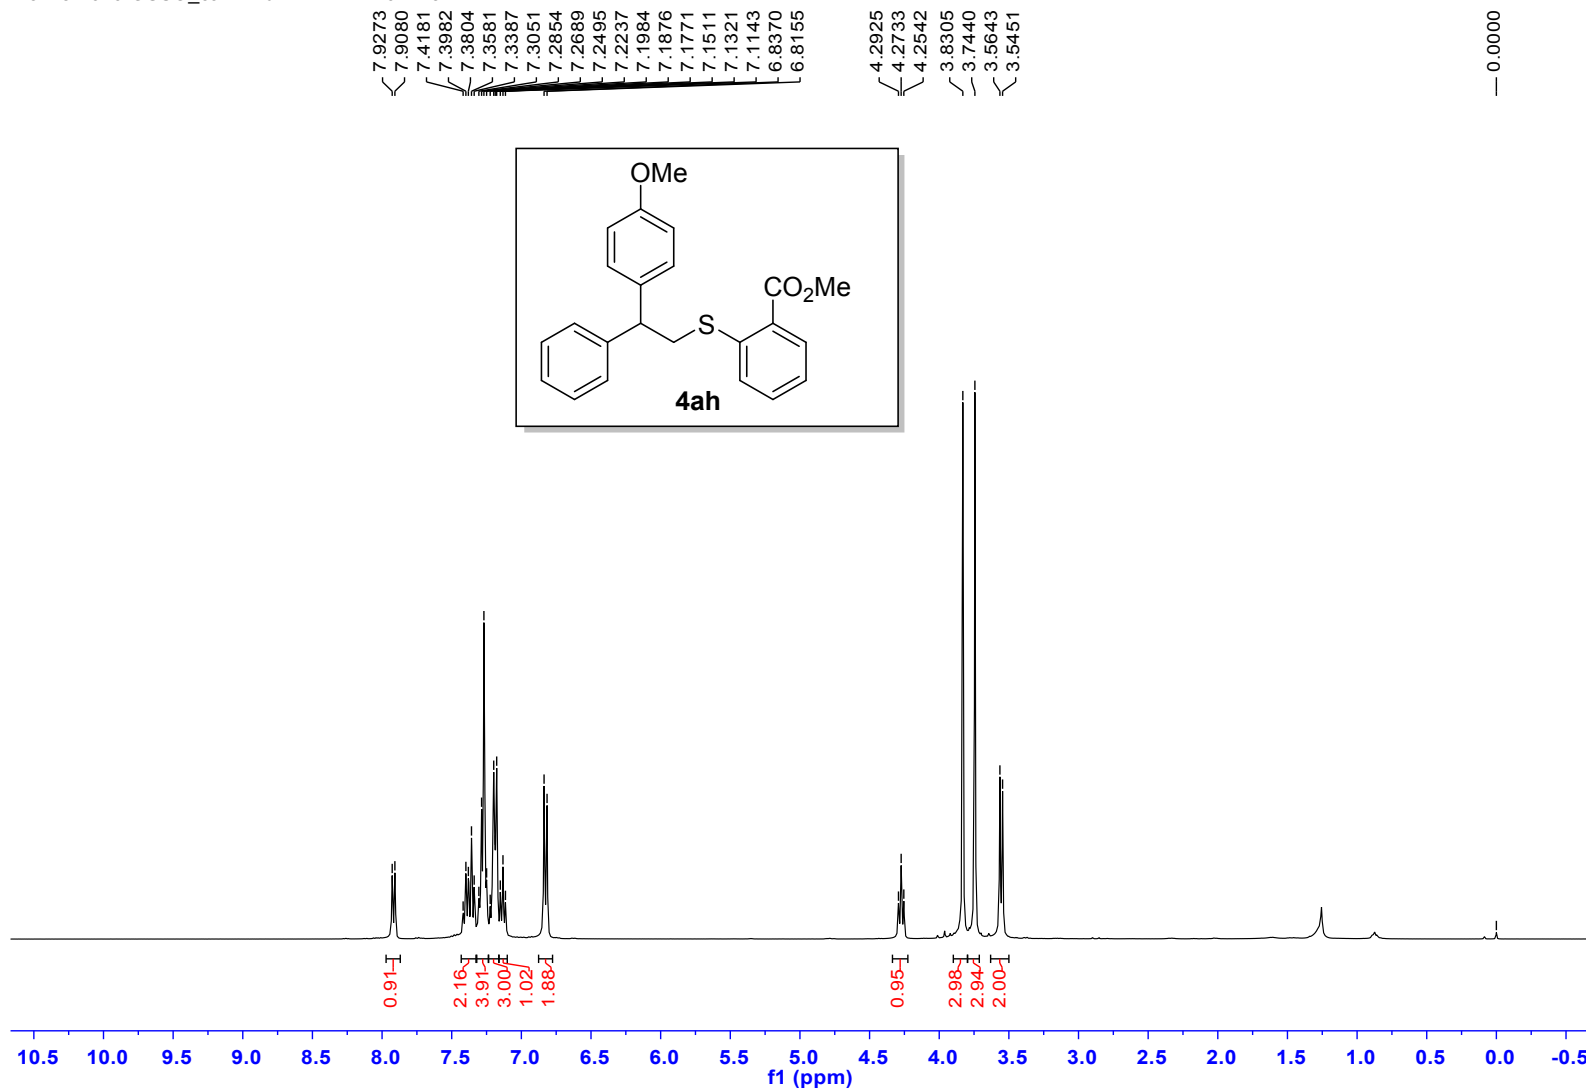

Nov26-2020-OSSO\_cj.44.fid — WYN-X201125-2-C

— 166.8986  
— 158.3578  
143.5539  
141.6774  
135.2271  
132.3208  
131.2256  
128.9103  
128.6517  
128.1646  
127.8235  
126.7024  
126.2166  
124.0599  
— 114.0329

— 55.2650  
— 52.1119  
— 49.2384  
— 38.5779

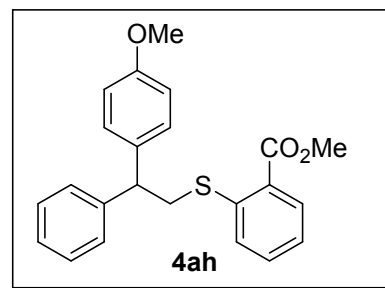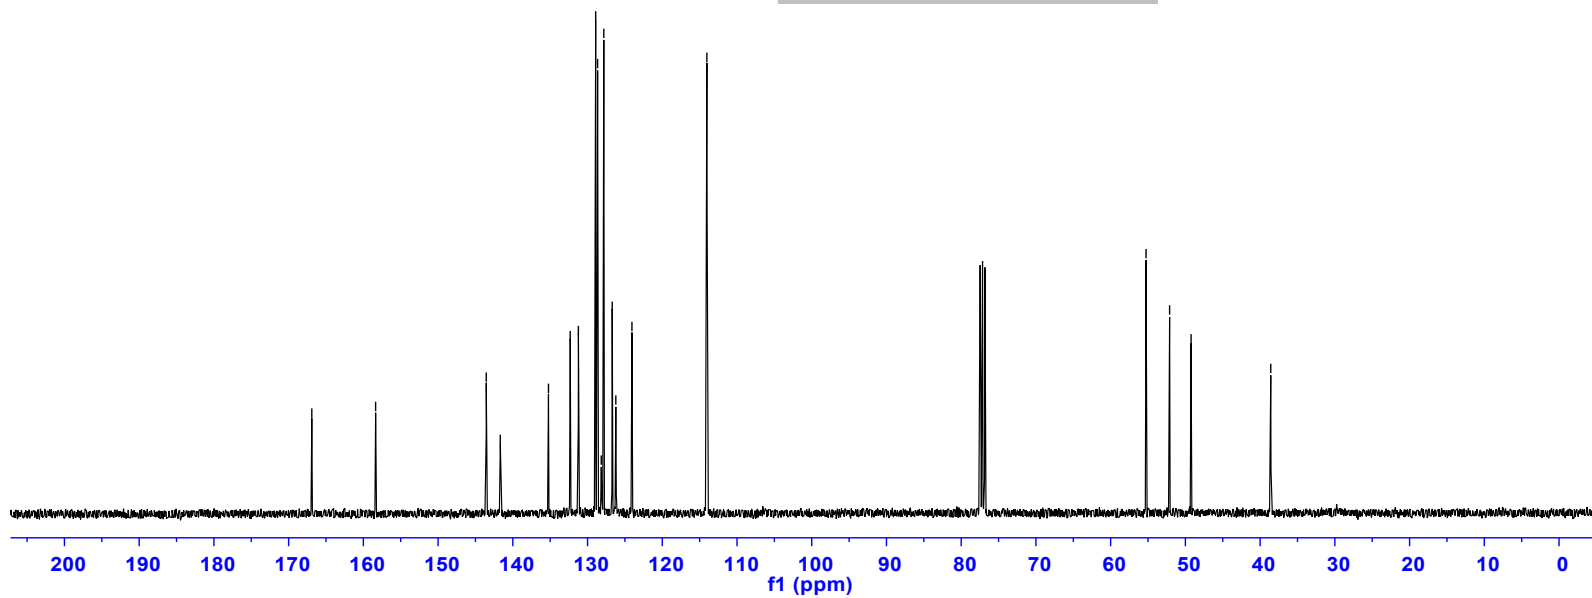

Nov12-2020-OSSO\_CJ.15.fid — WYN-X201112-12

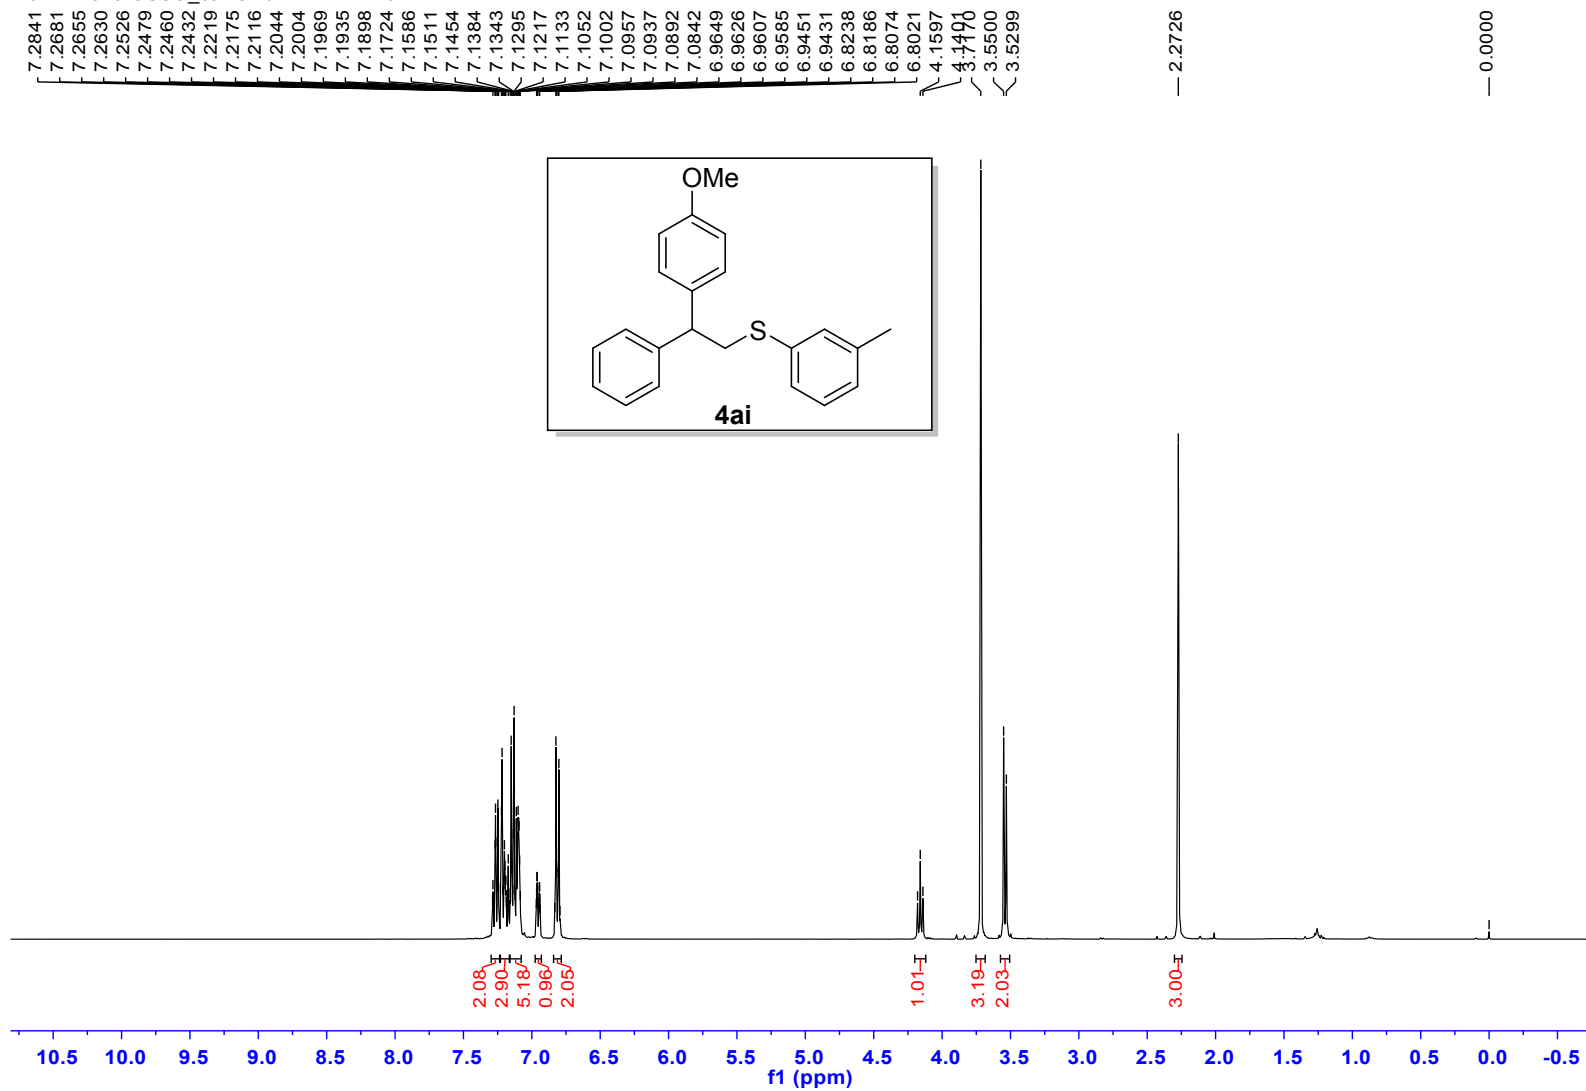



Nov13-2020-OSSO\_cj.31.fid — WYN-X201112-12-C

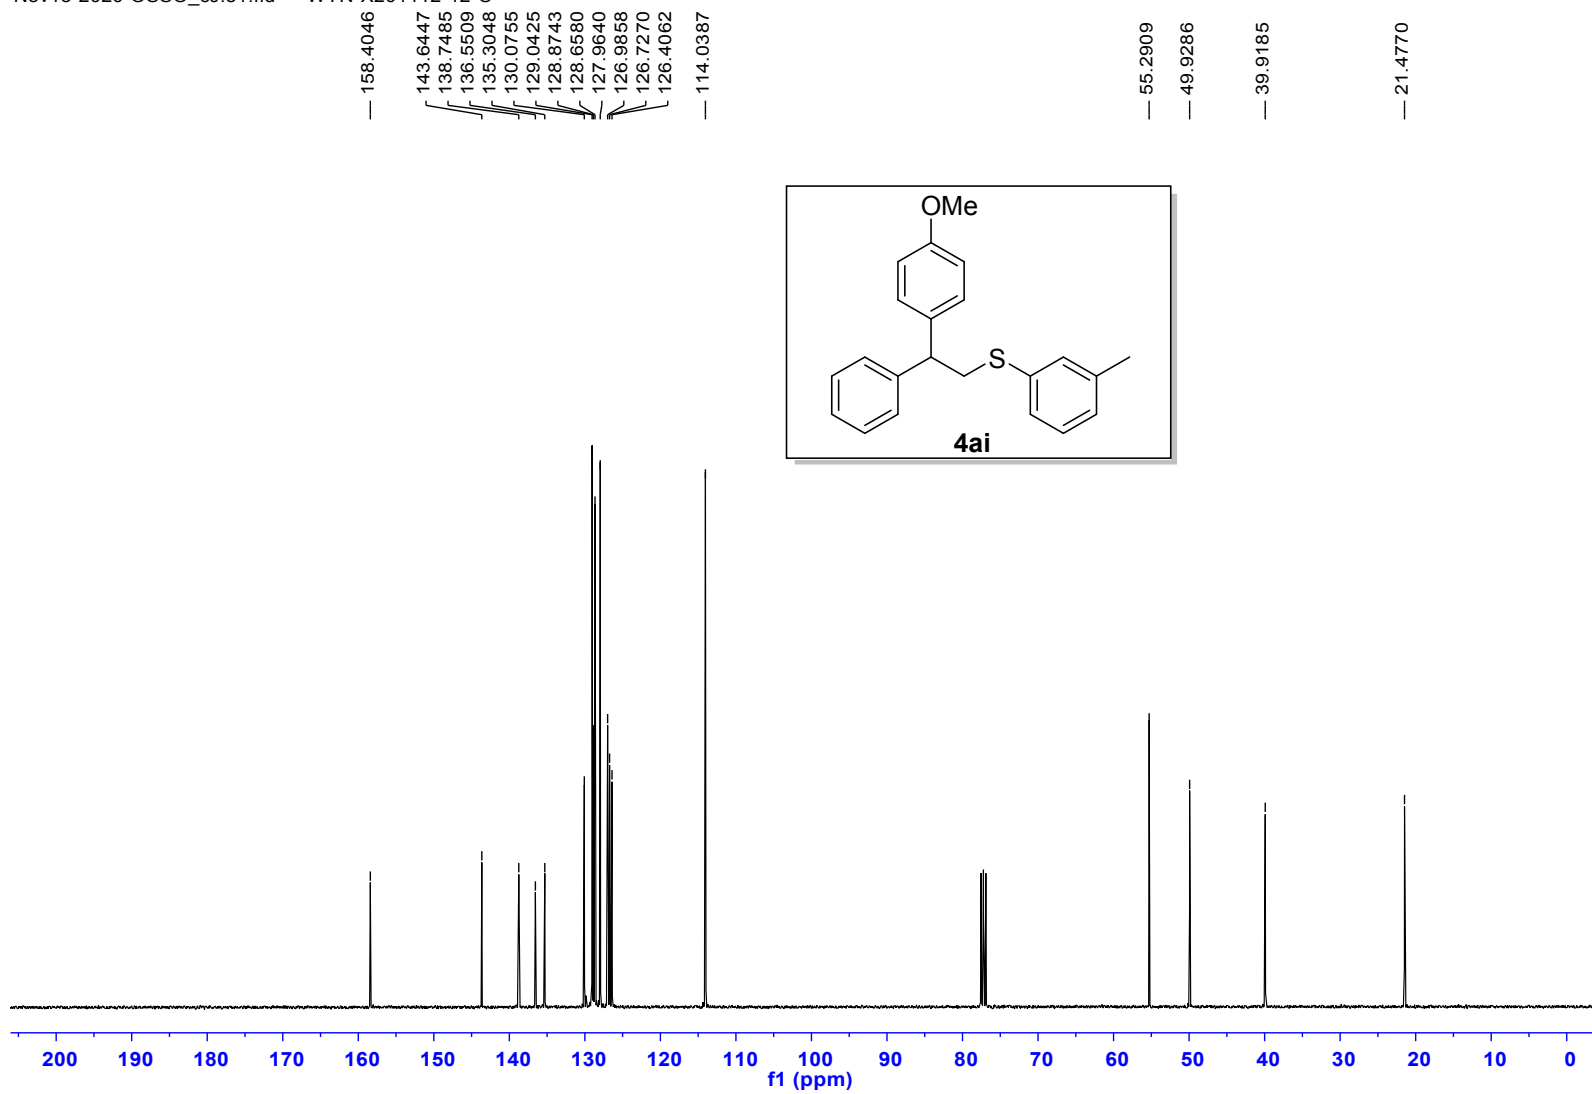

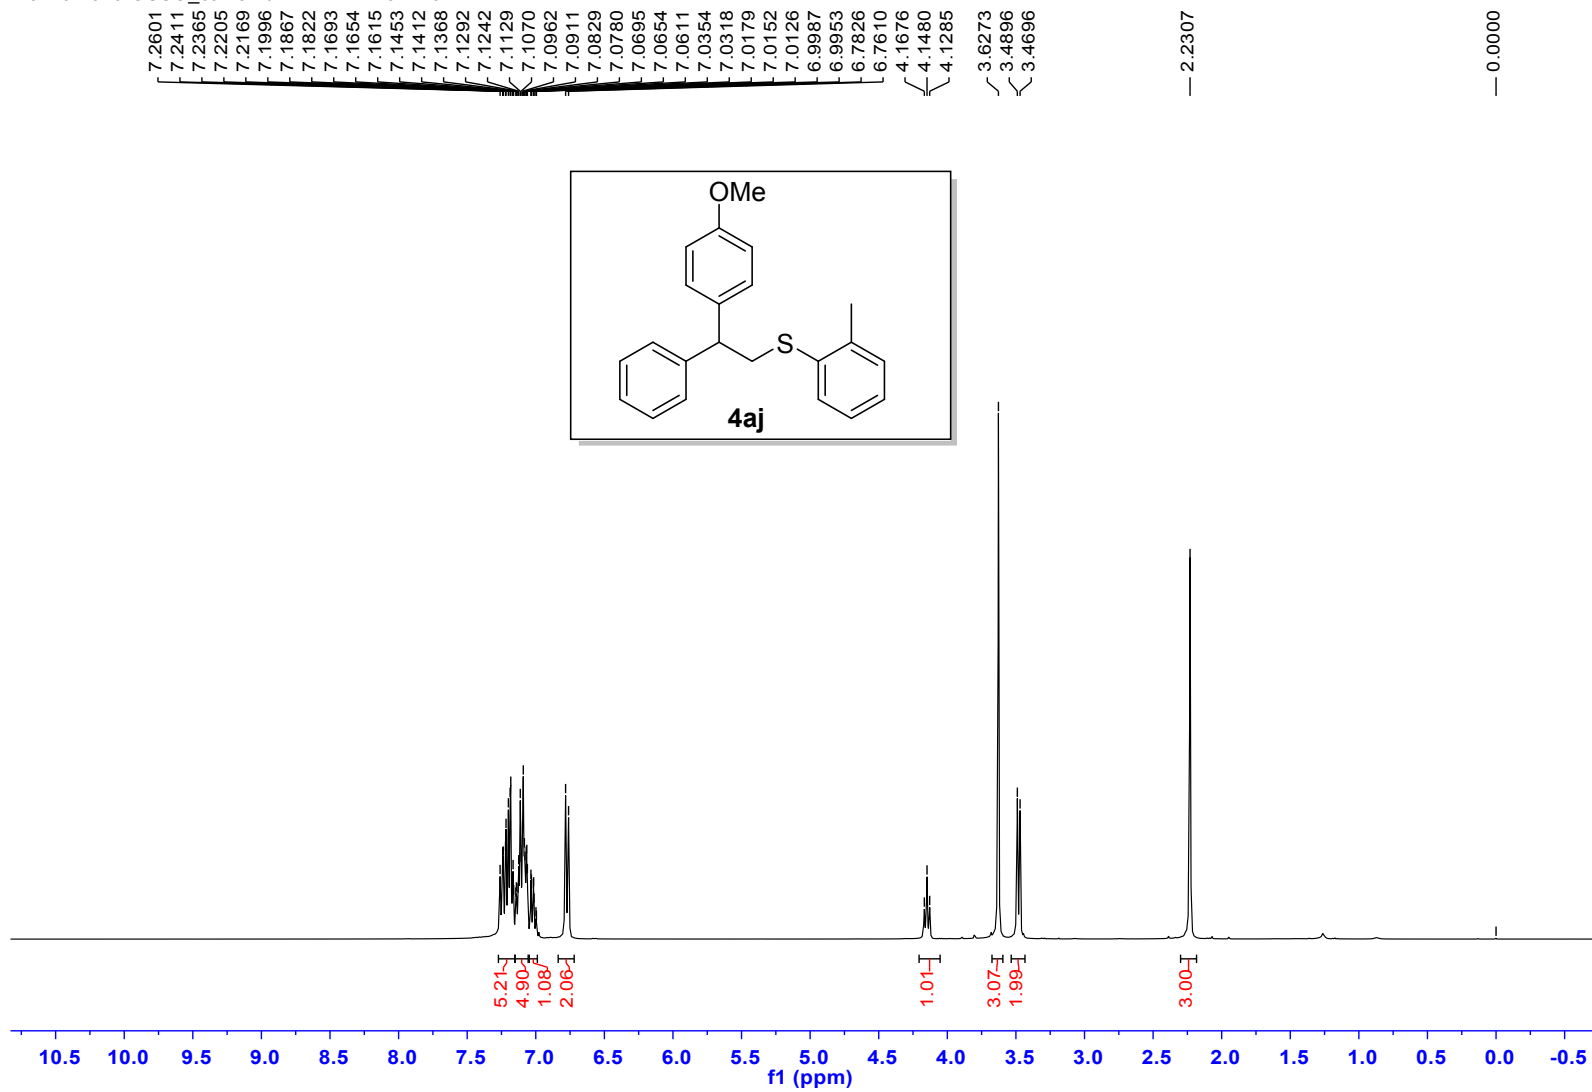

Nov17-2020-OSSO\_cj.7.fid — WYN-X201116-4-C

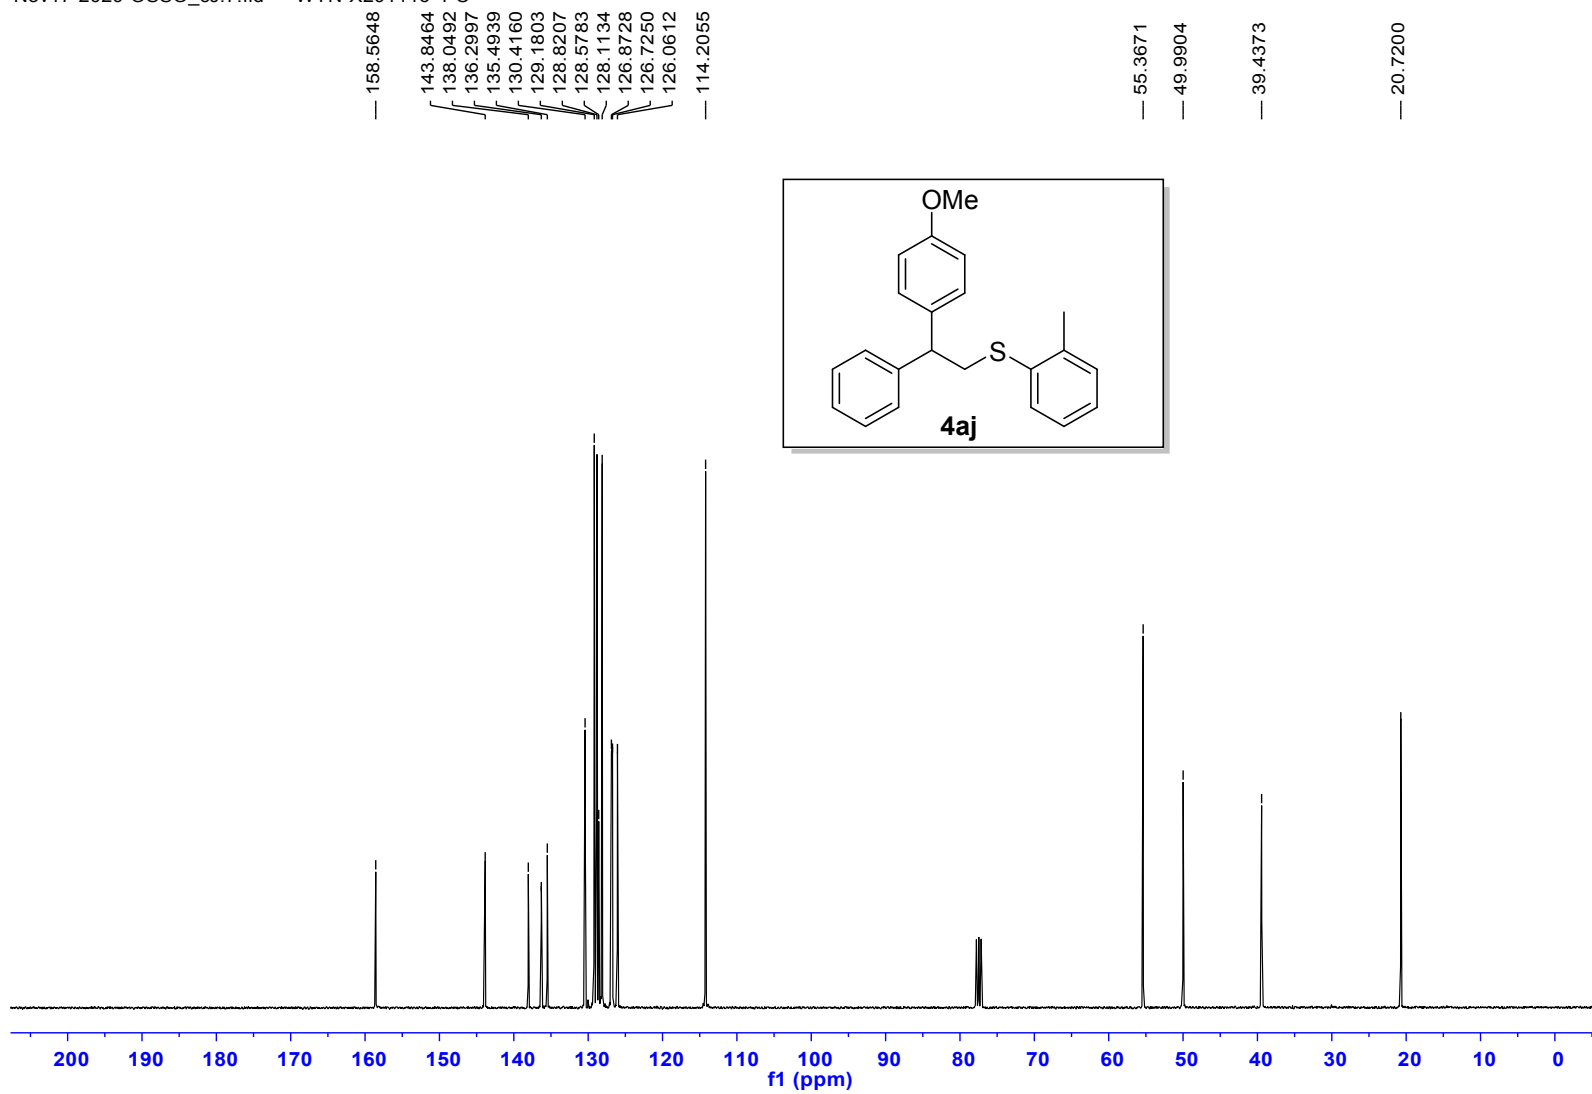

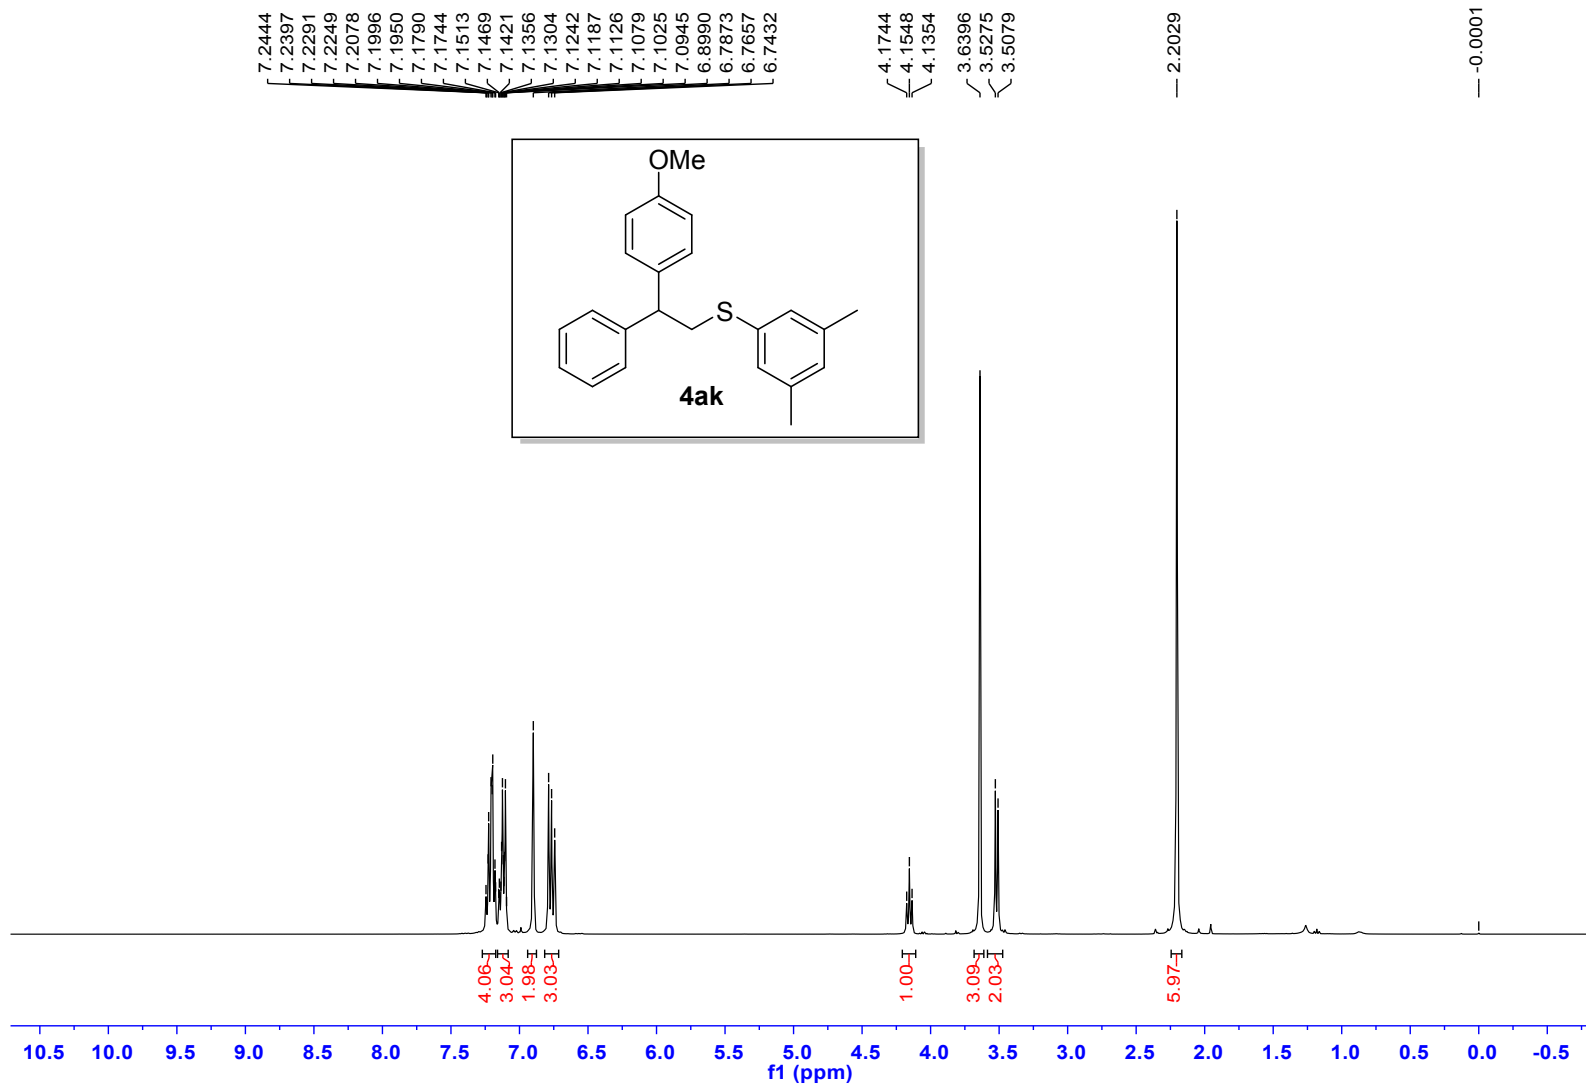

Nov17-2020-OSSO\_cj.8.fid — WYN-X201116-5-C

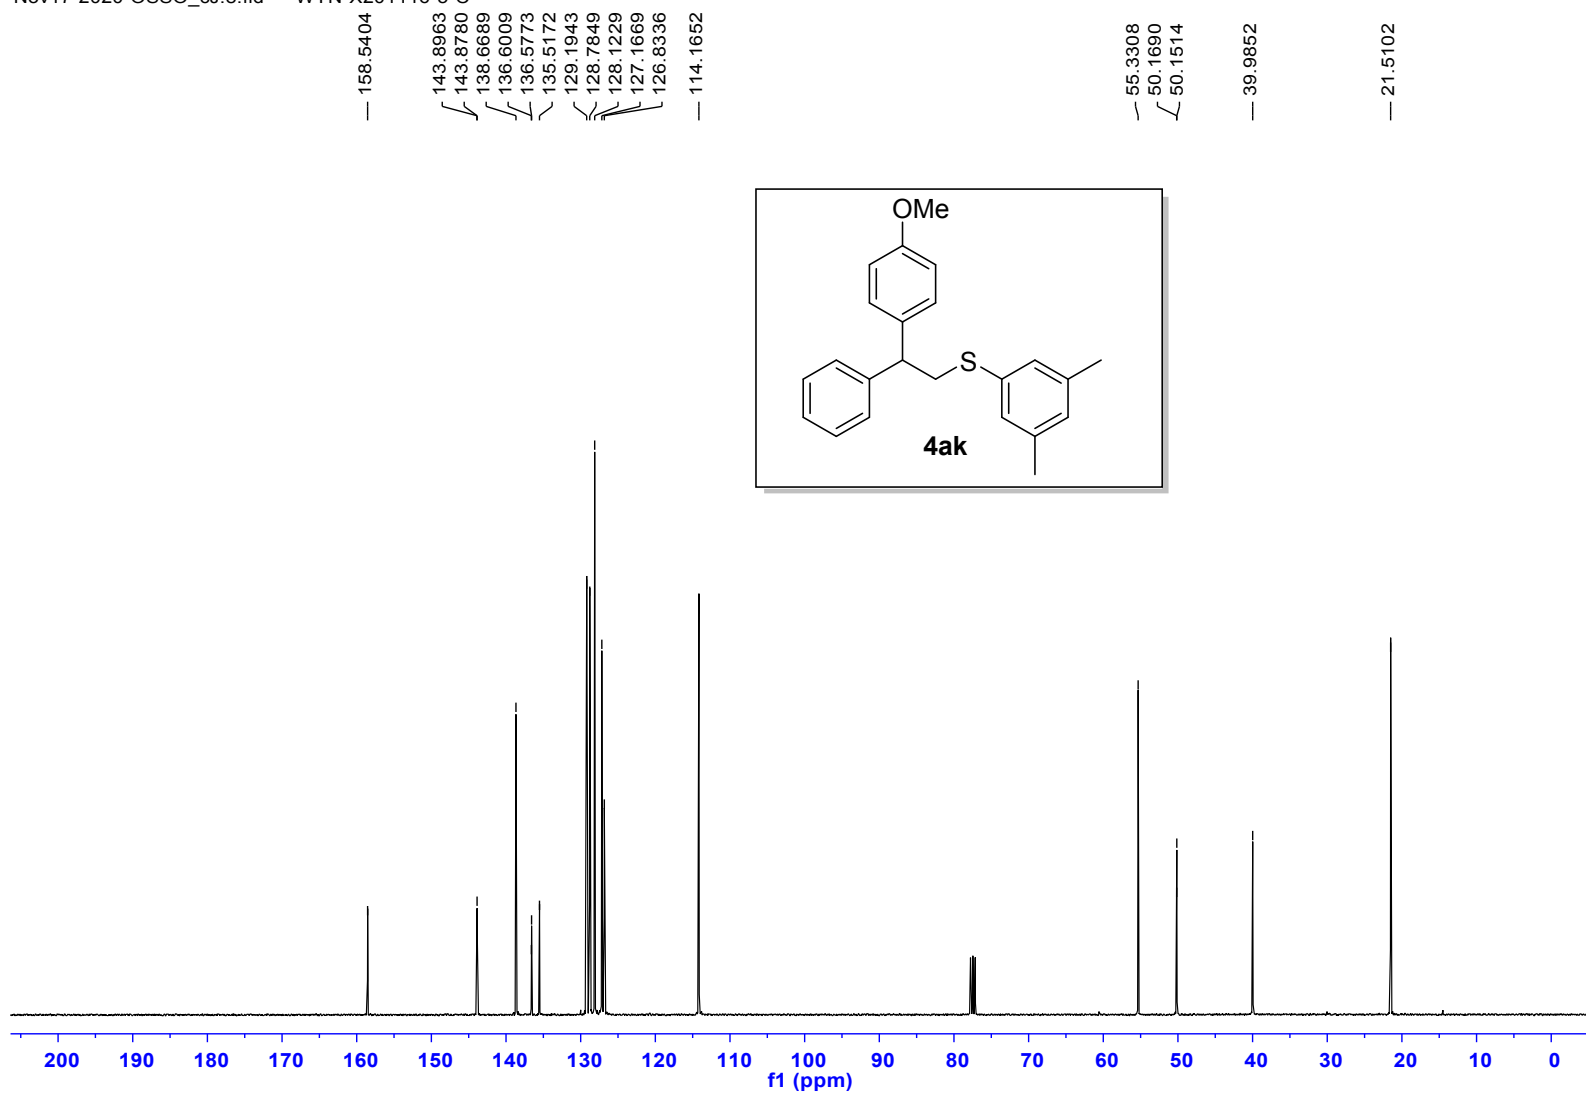

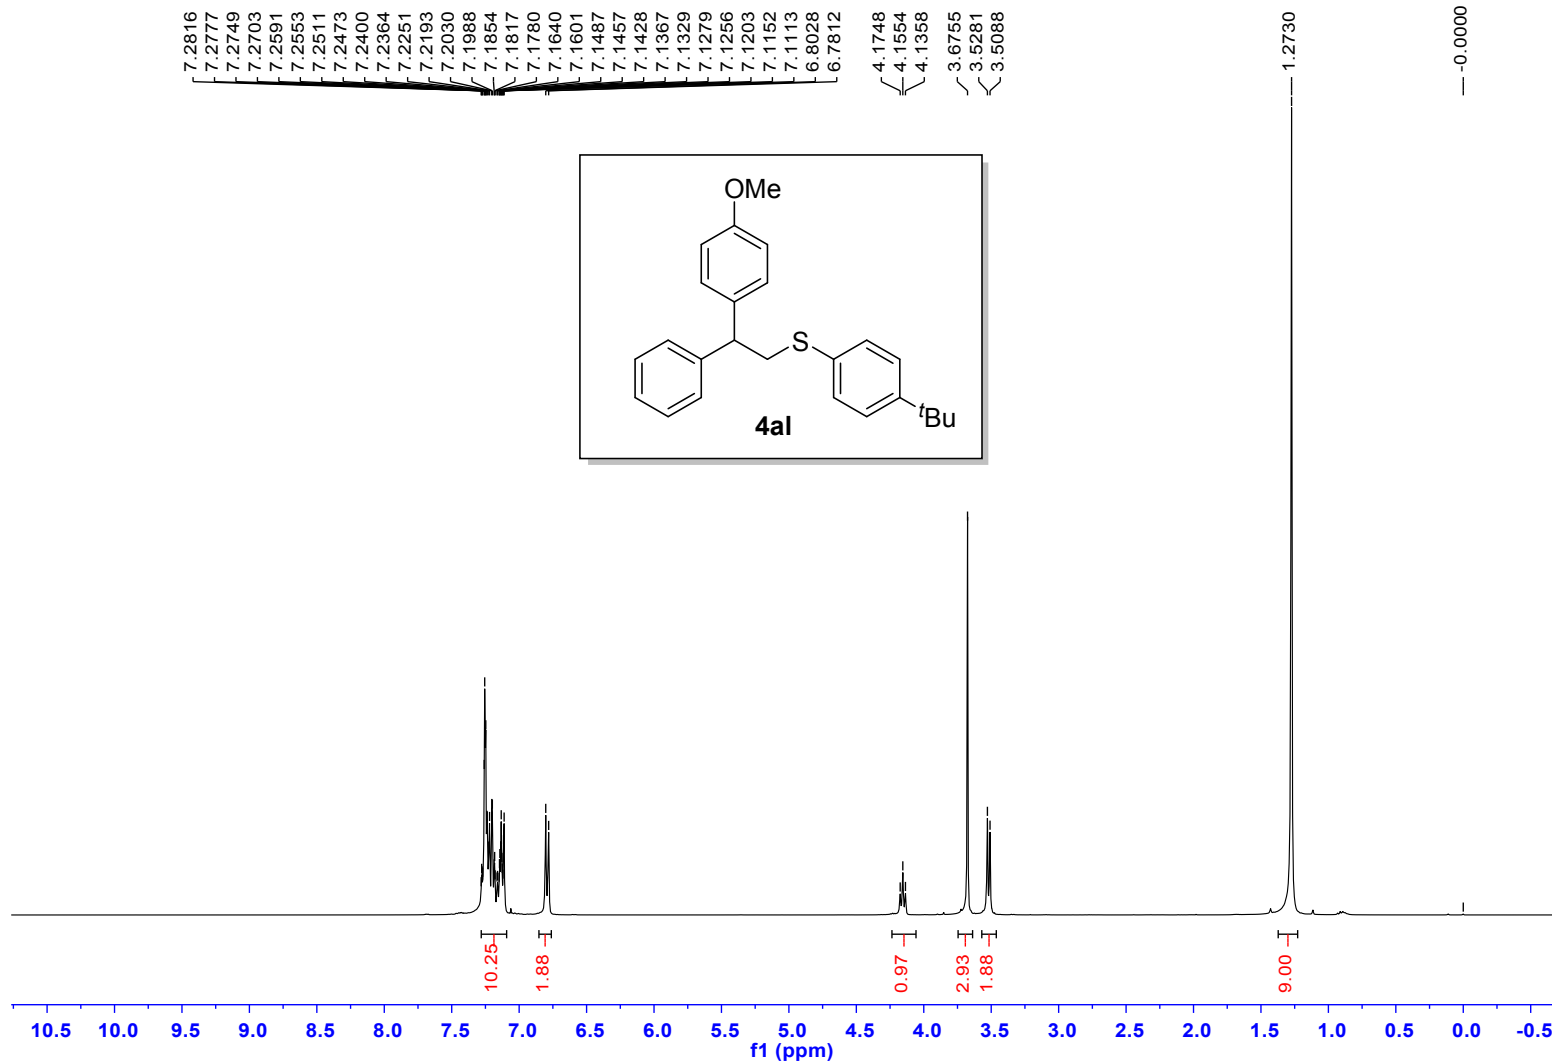

— 158.4529  
— 149.4282  
— 143.7833  
— 135.4357  
— 133.3250  
— 129.8040  
— 129.1290  
— 128.7137  
— 128.0579  
— 126.7598  
— 126.1497  
— 114.1074

— 55.3125  
— 50.0957  
— 40.5094  
— 34.6297  
— 31.5234

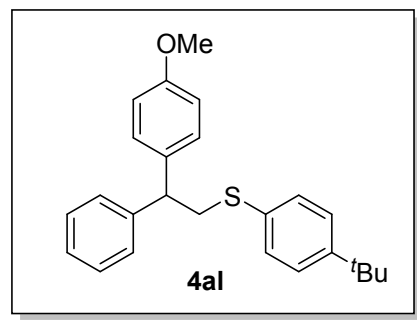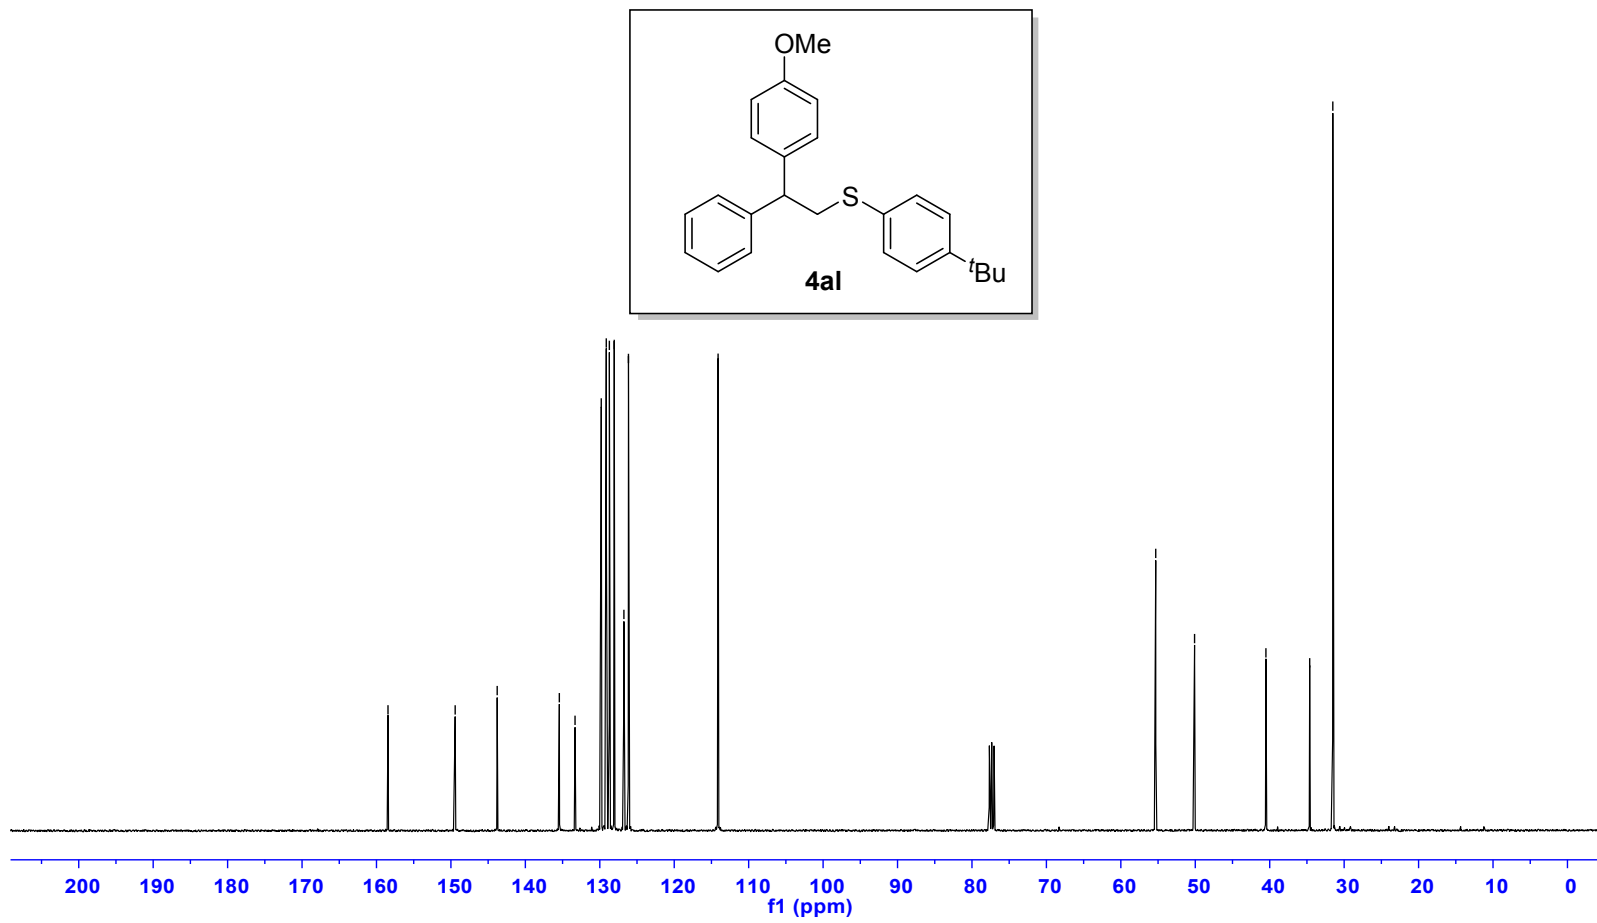

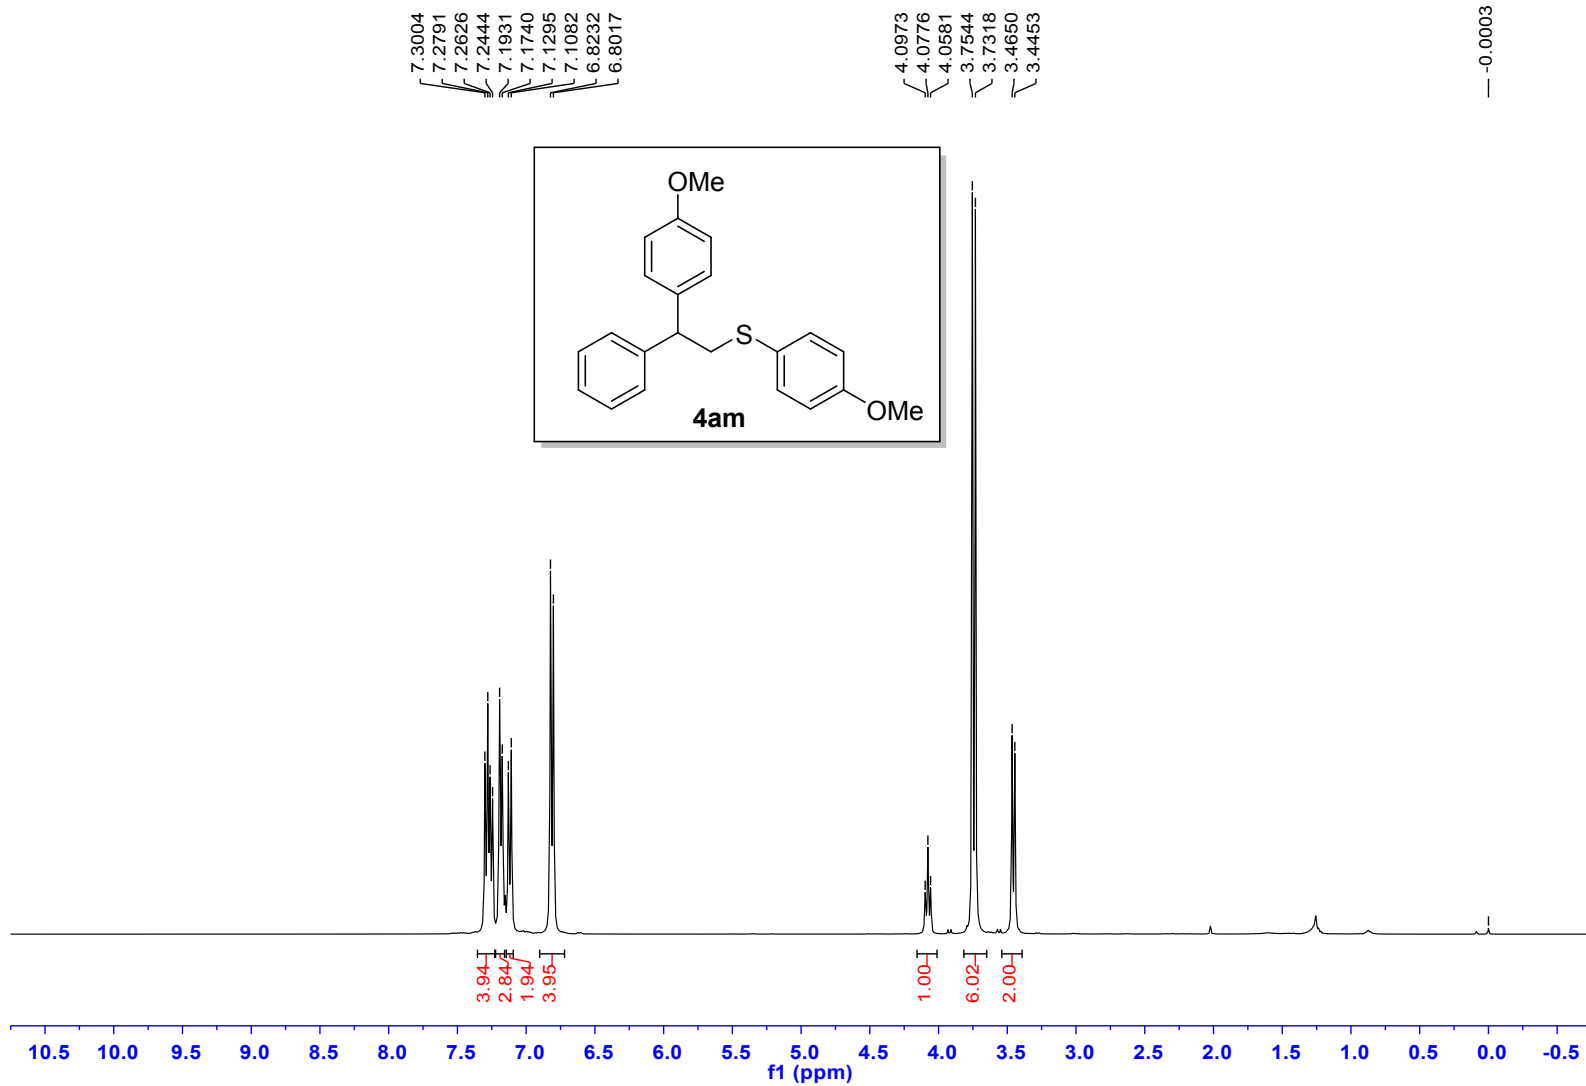

— -0.0003



Dec04-2020-OSSO\_cj.6.fid — WYN-X201204-1-C

158.9888  
158.2876

143.6383  
135.3040  
133.4338  
129.0127  
128.5825  
127.9395  
126.6286  
126.6045

114.6530  
113.9613

55.3884  
55.2637  
49.9096

42.0180

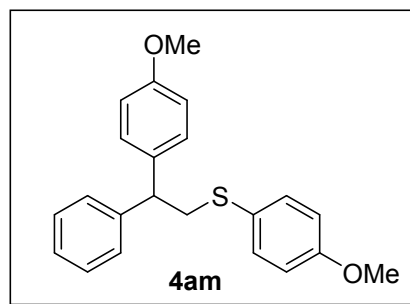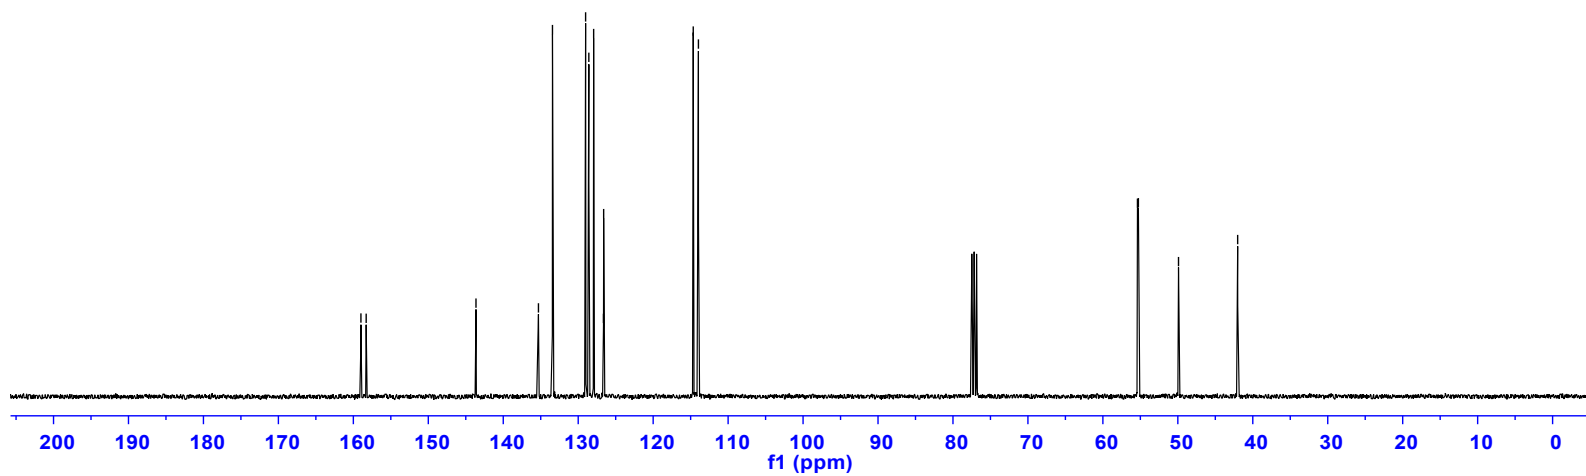

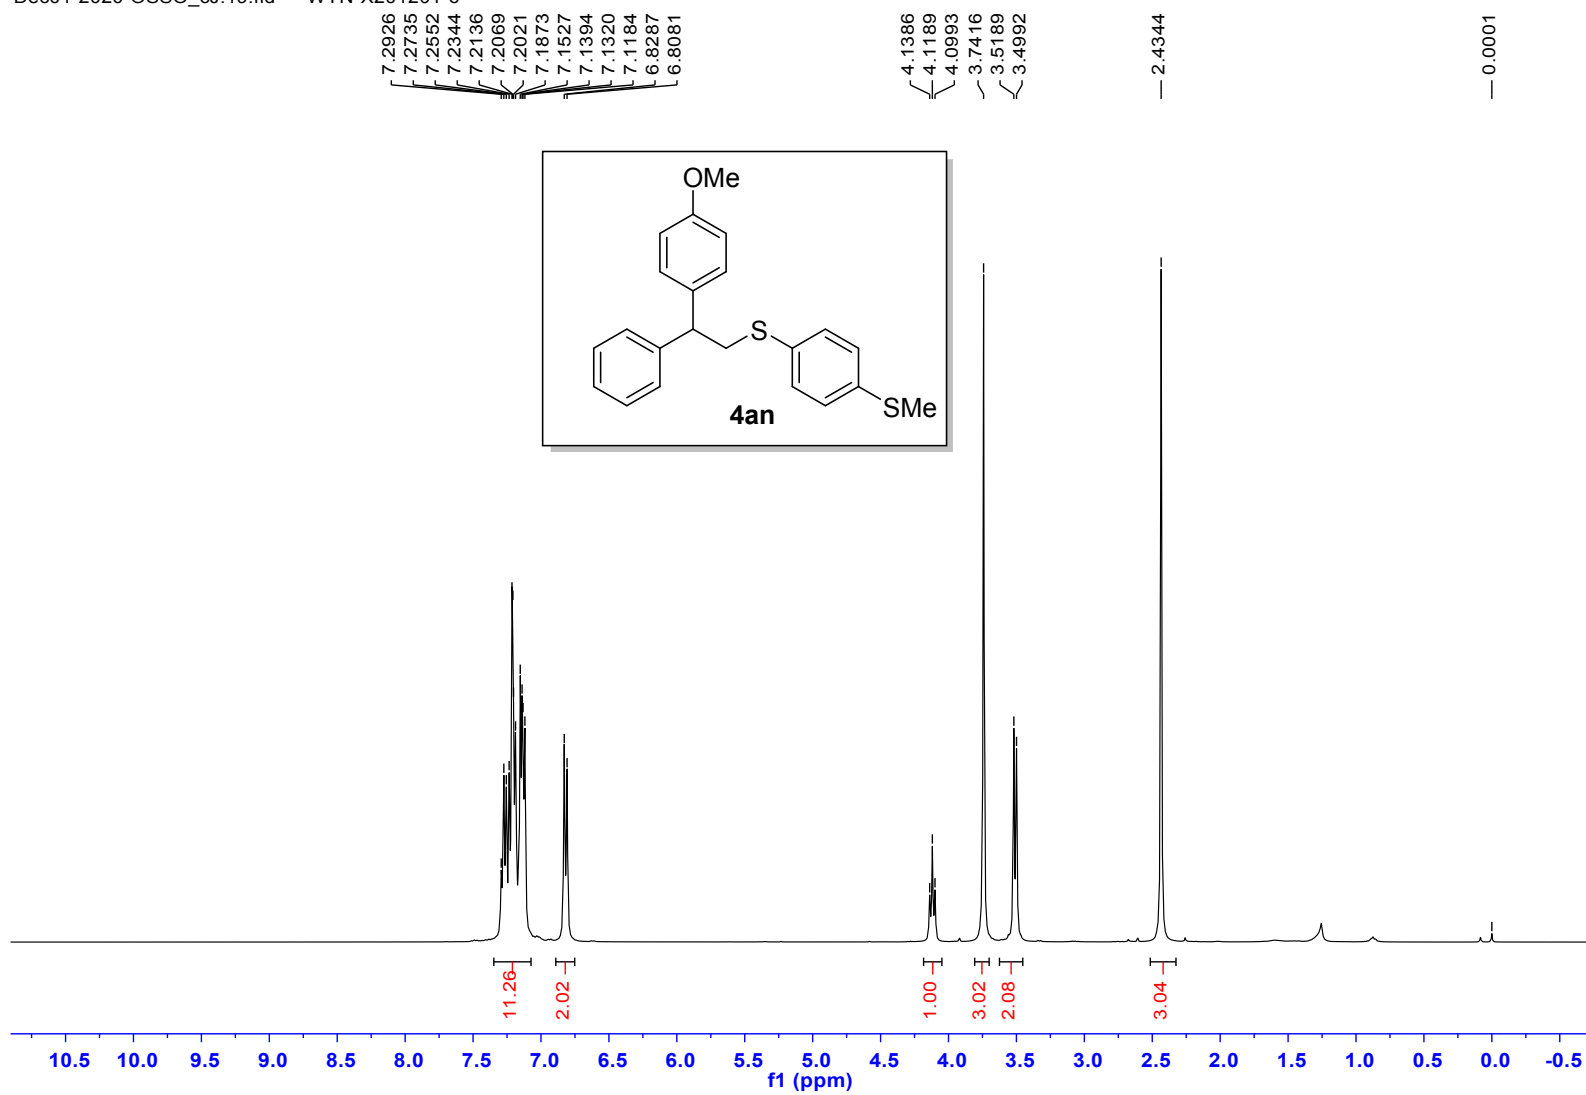

Dec08-2020-OSSO\_cj.2.fid — wyn-x201208-1

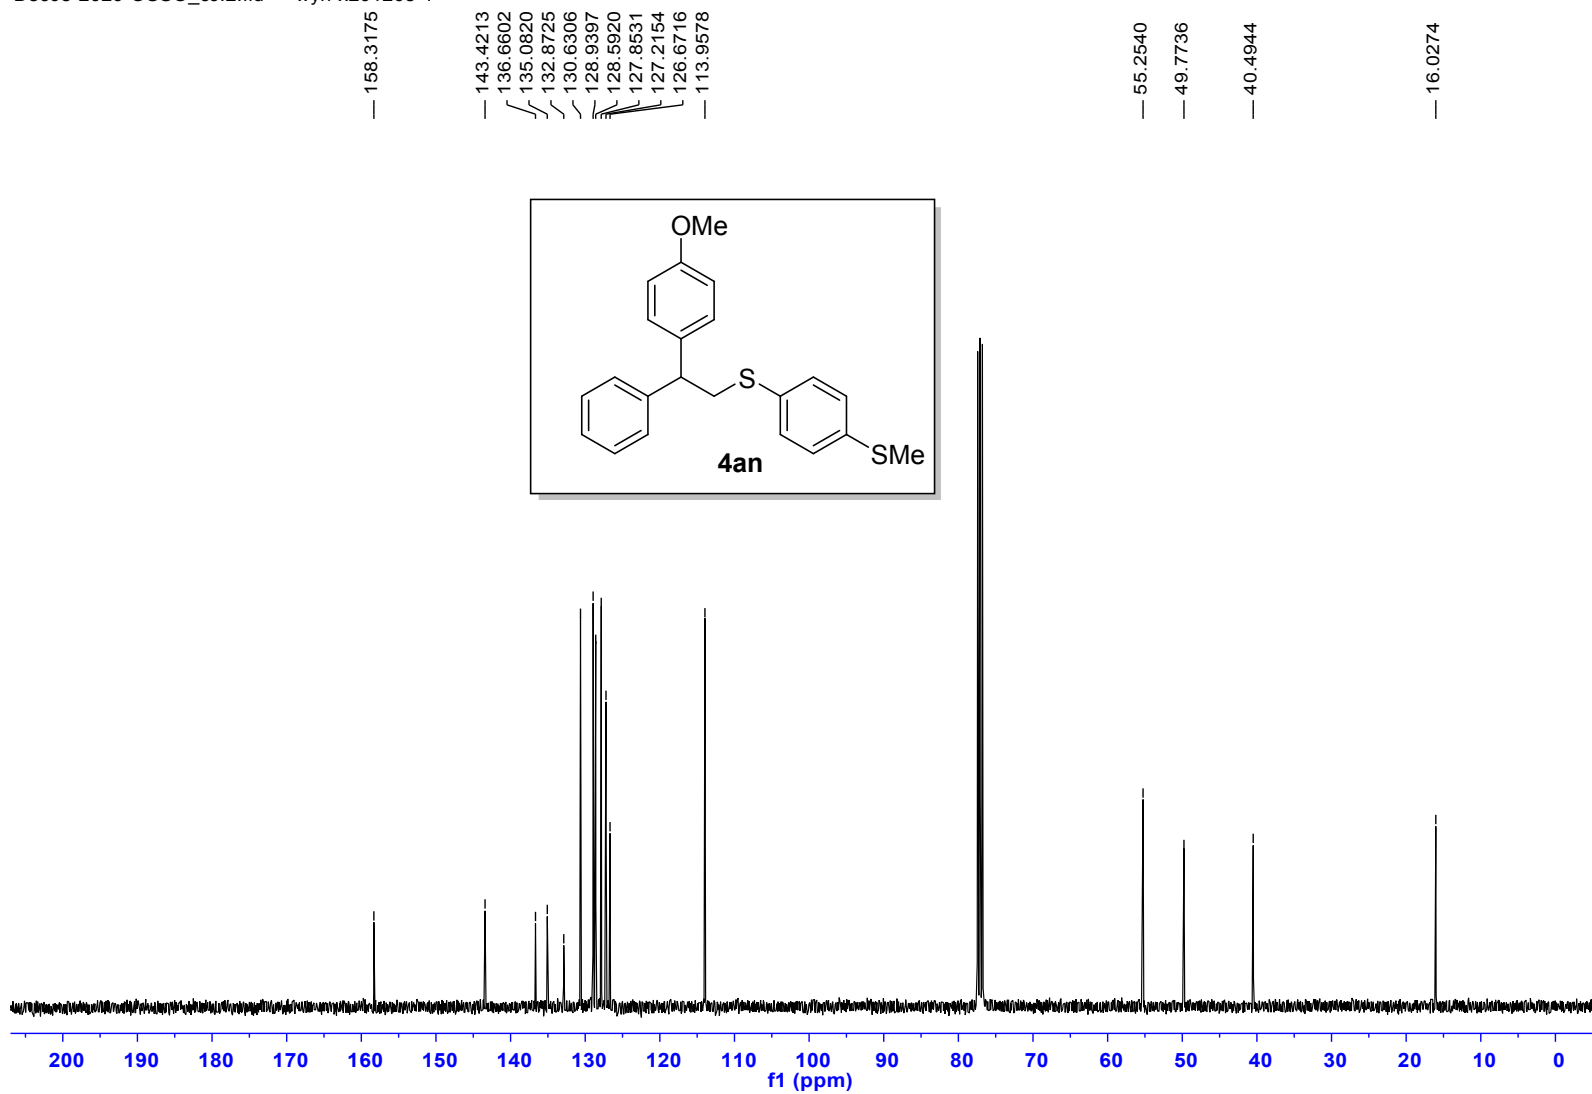

Nov27-2020-OSSO\_cj.20.fid — wyn-x201127-7

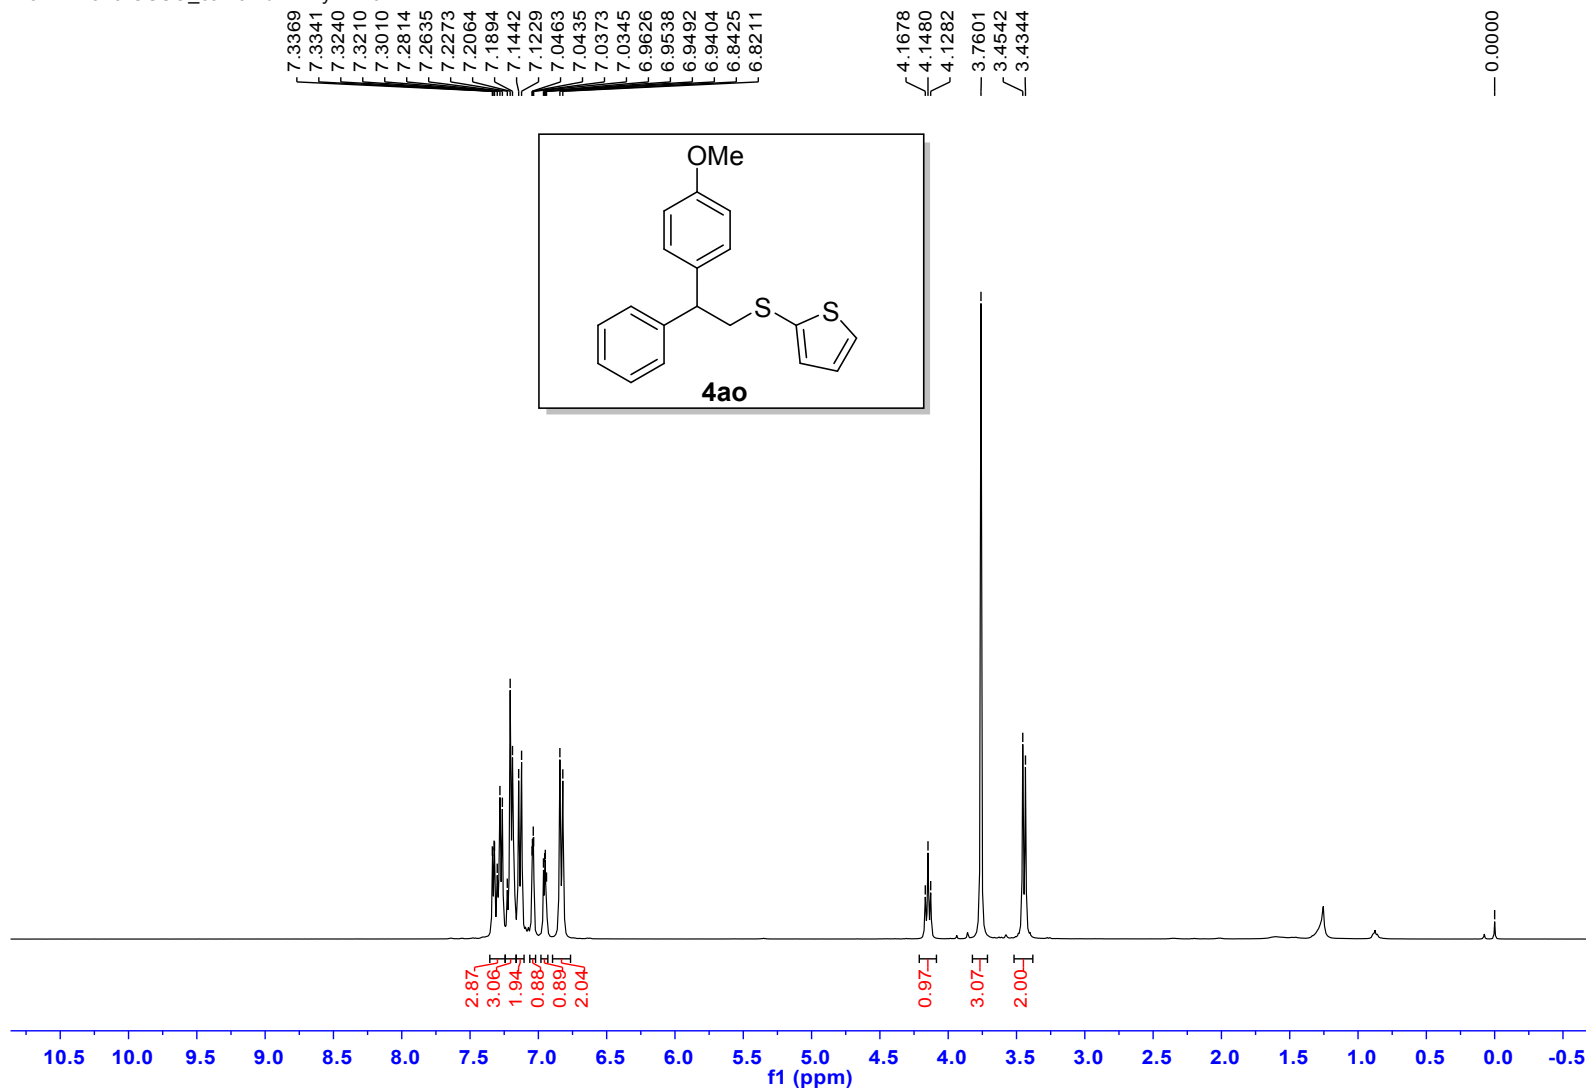

Nov30-2020-OSSO\_cj.13.fid — WYN-X201130-5

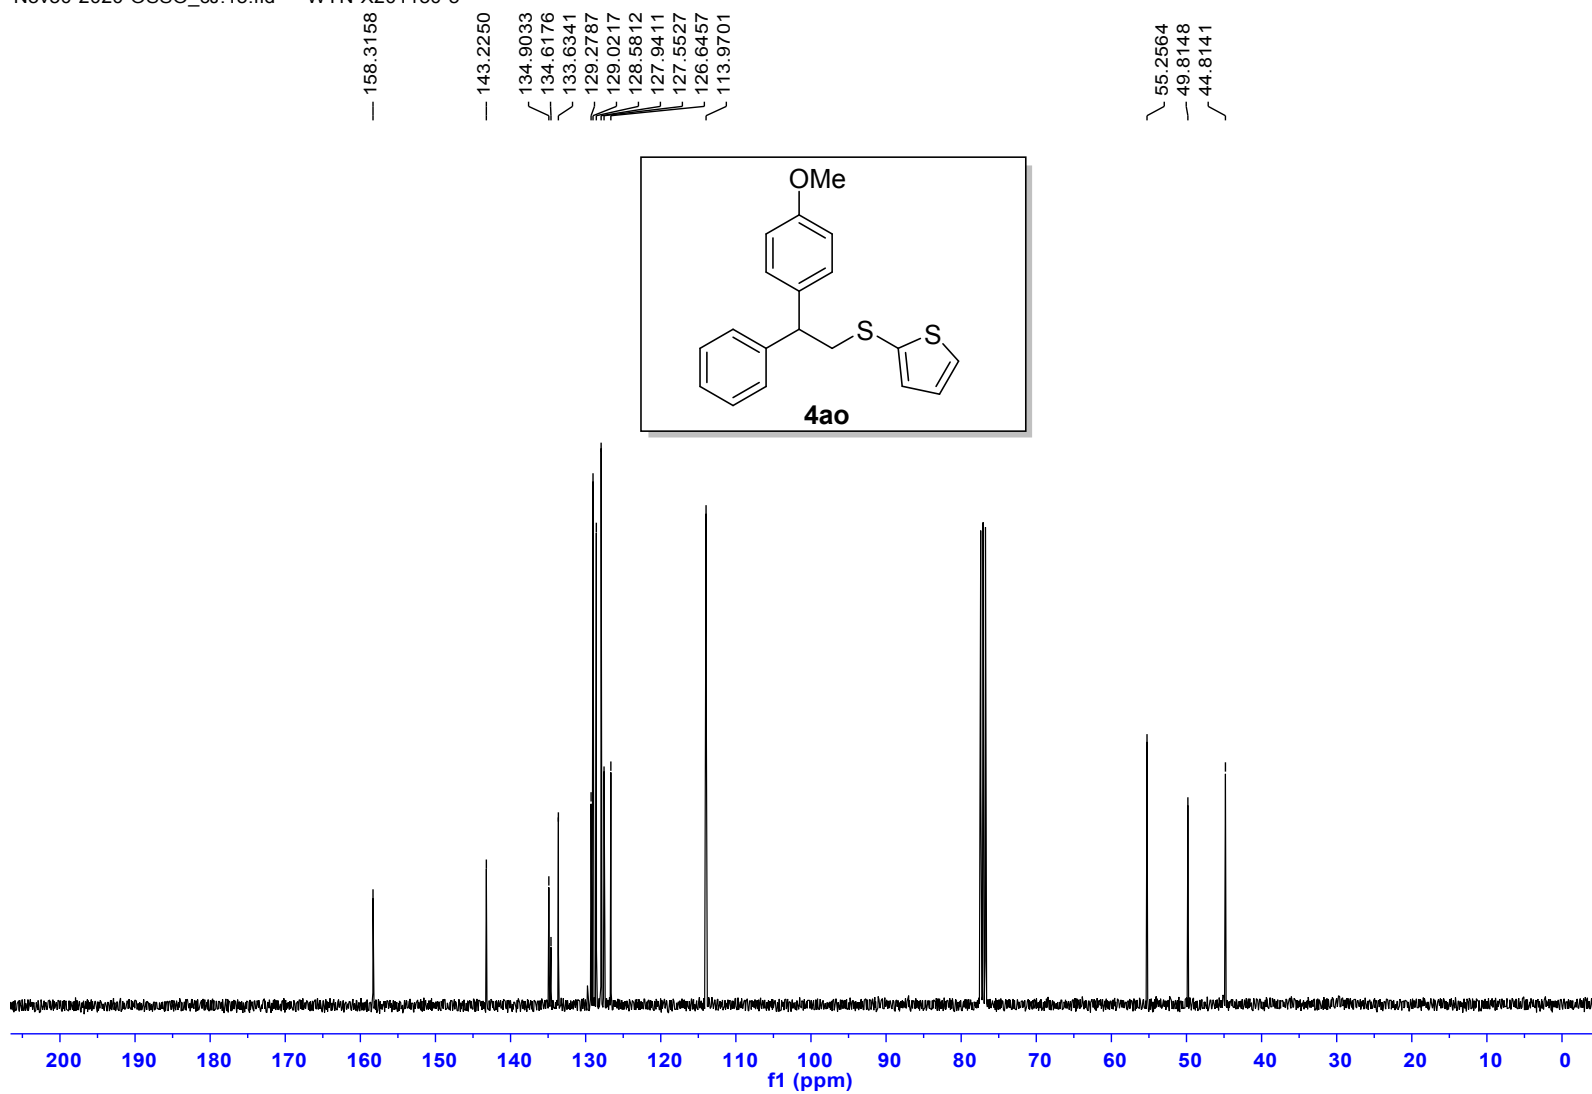

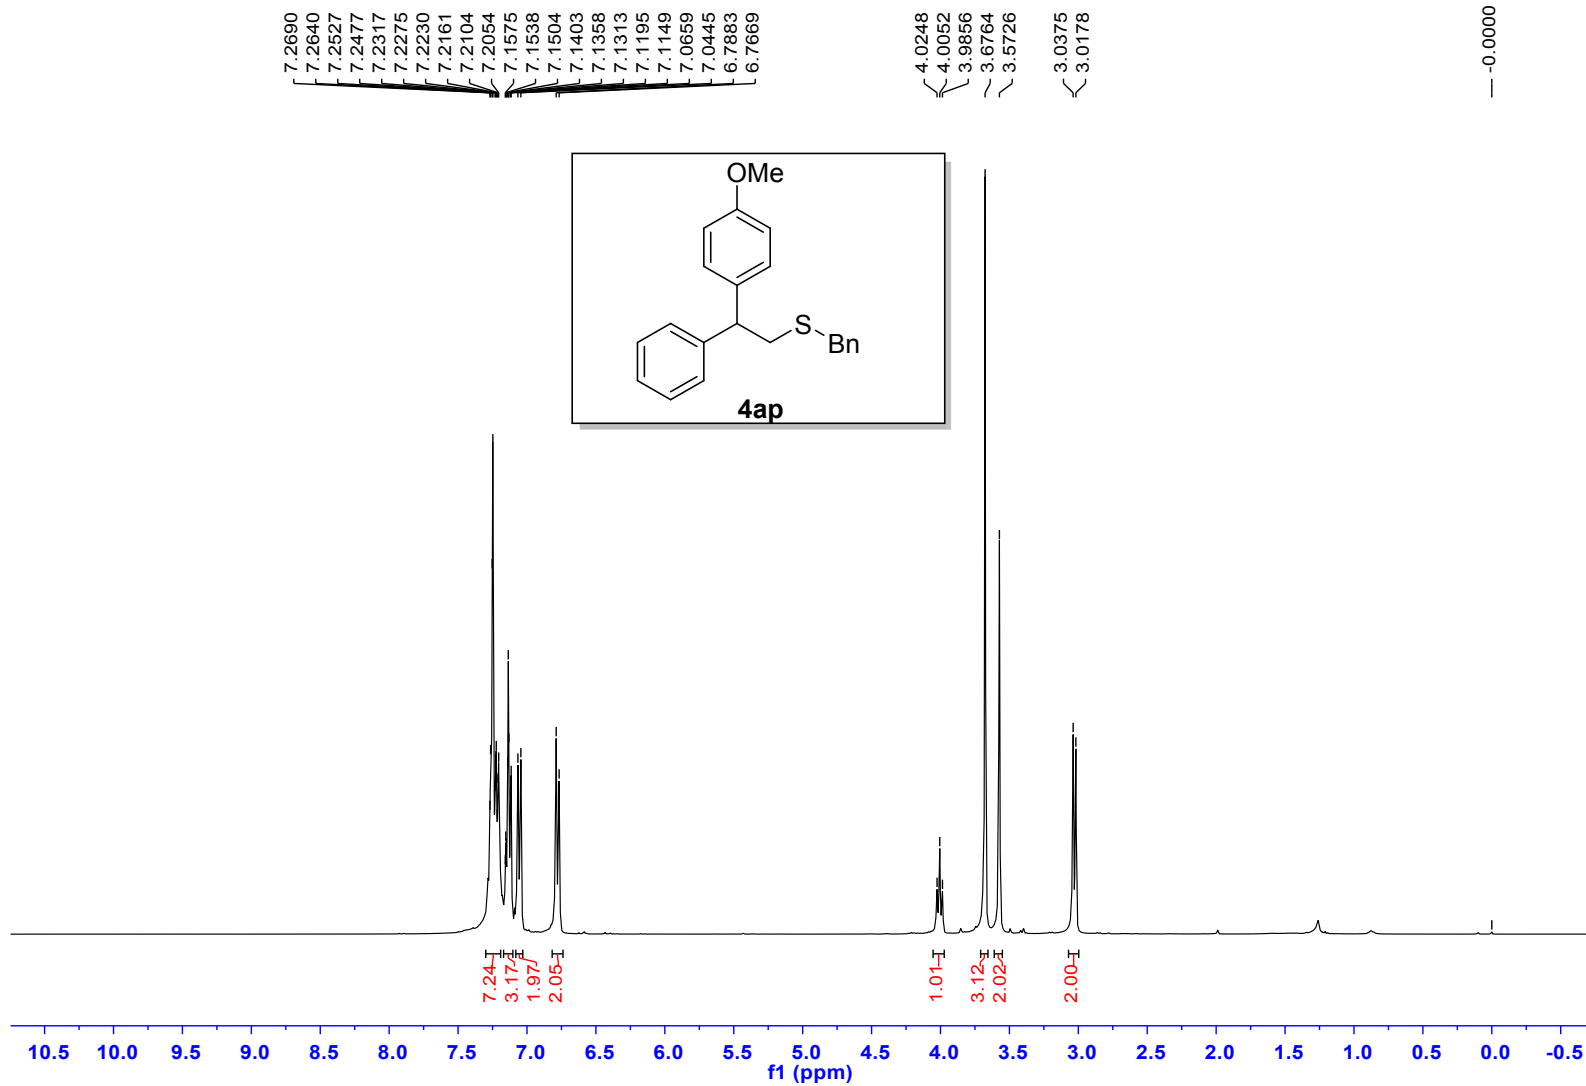

Nov17-2020-OSSO\_cj.9.fid — WYN-X201116-6-C

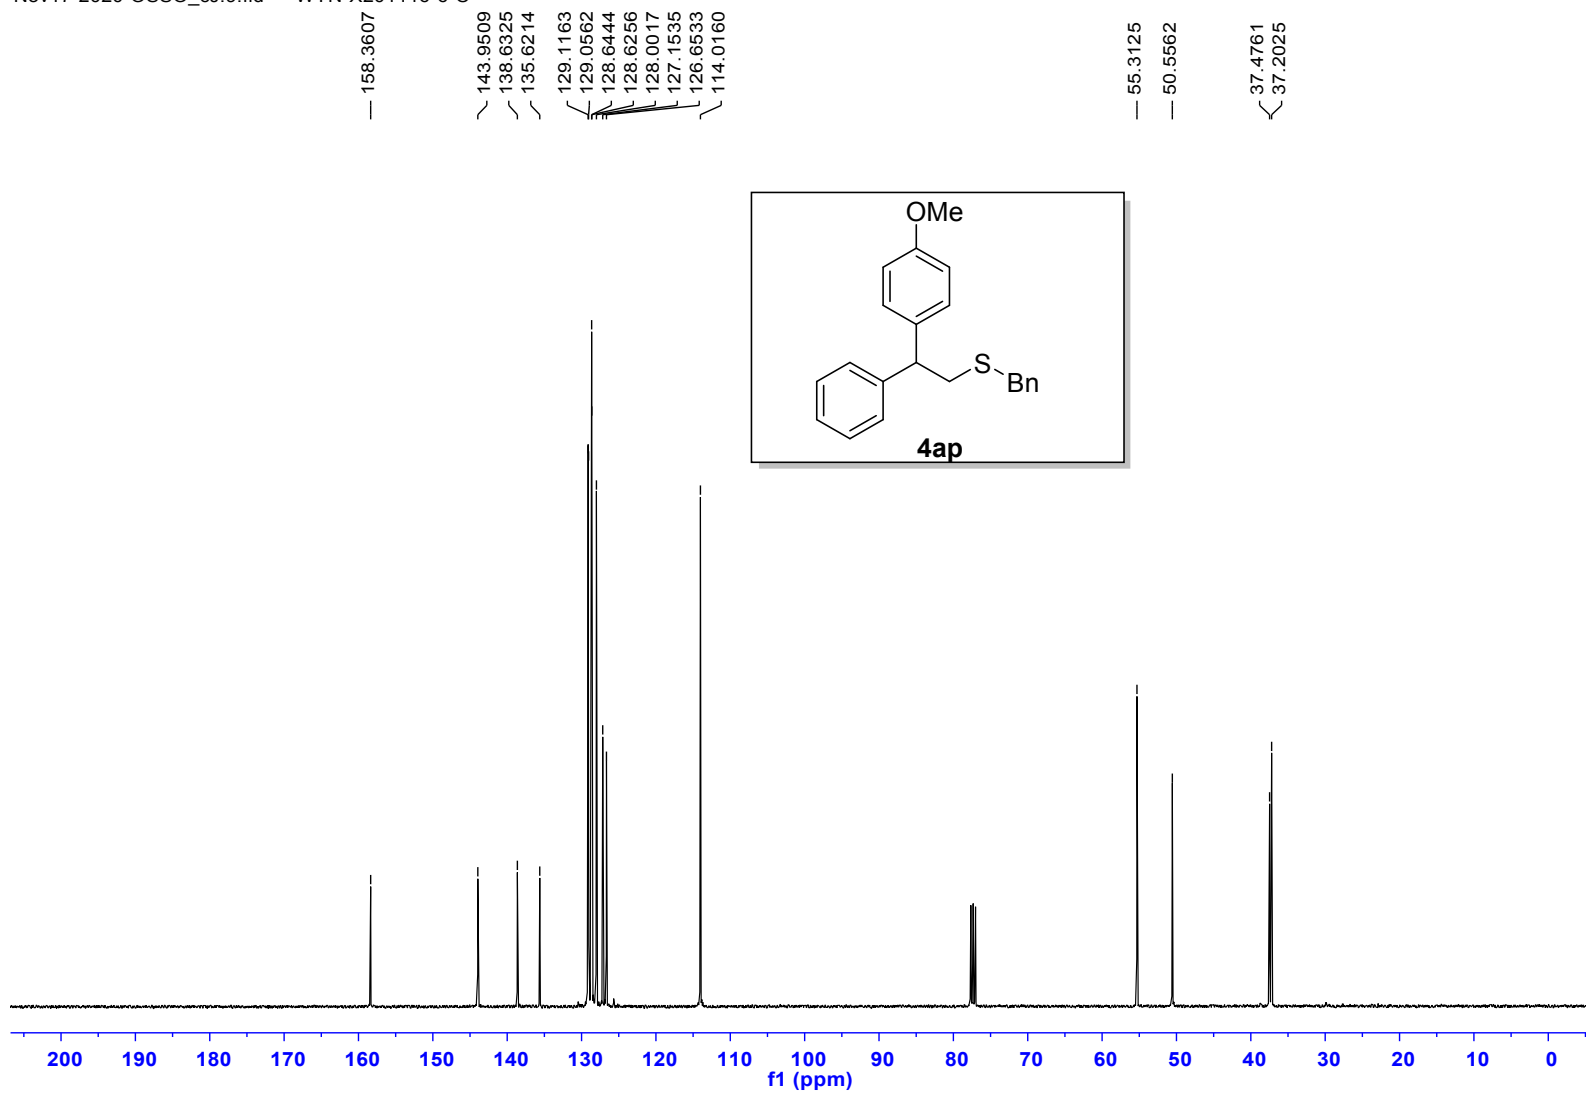

Nov16-2020-OSSO\_cj.5.fid — WYN-X201116-3

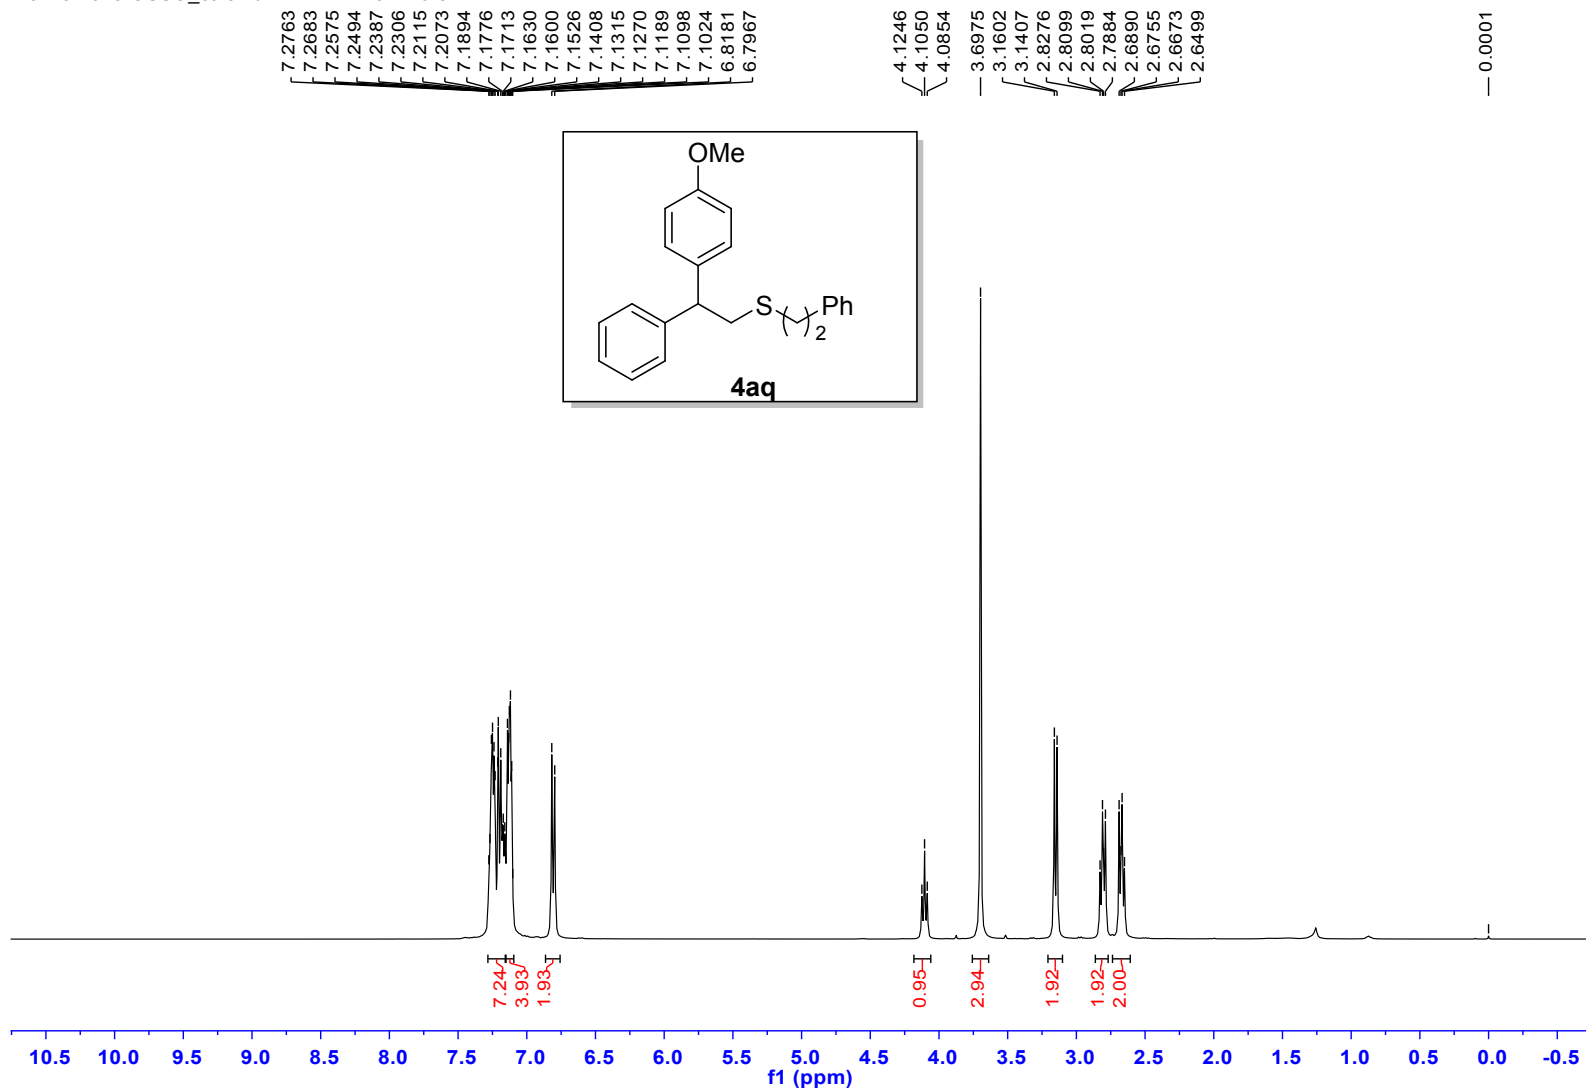



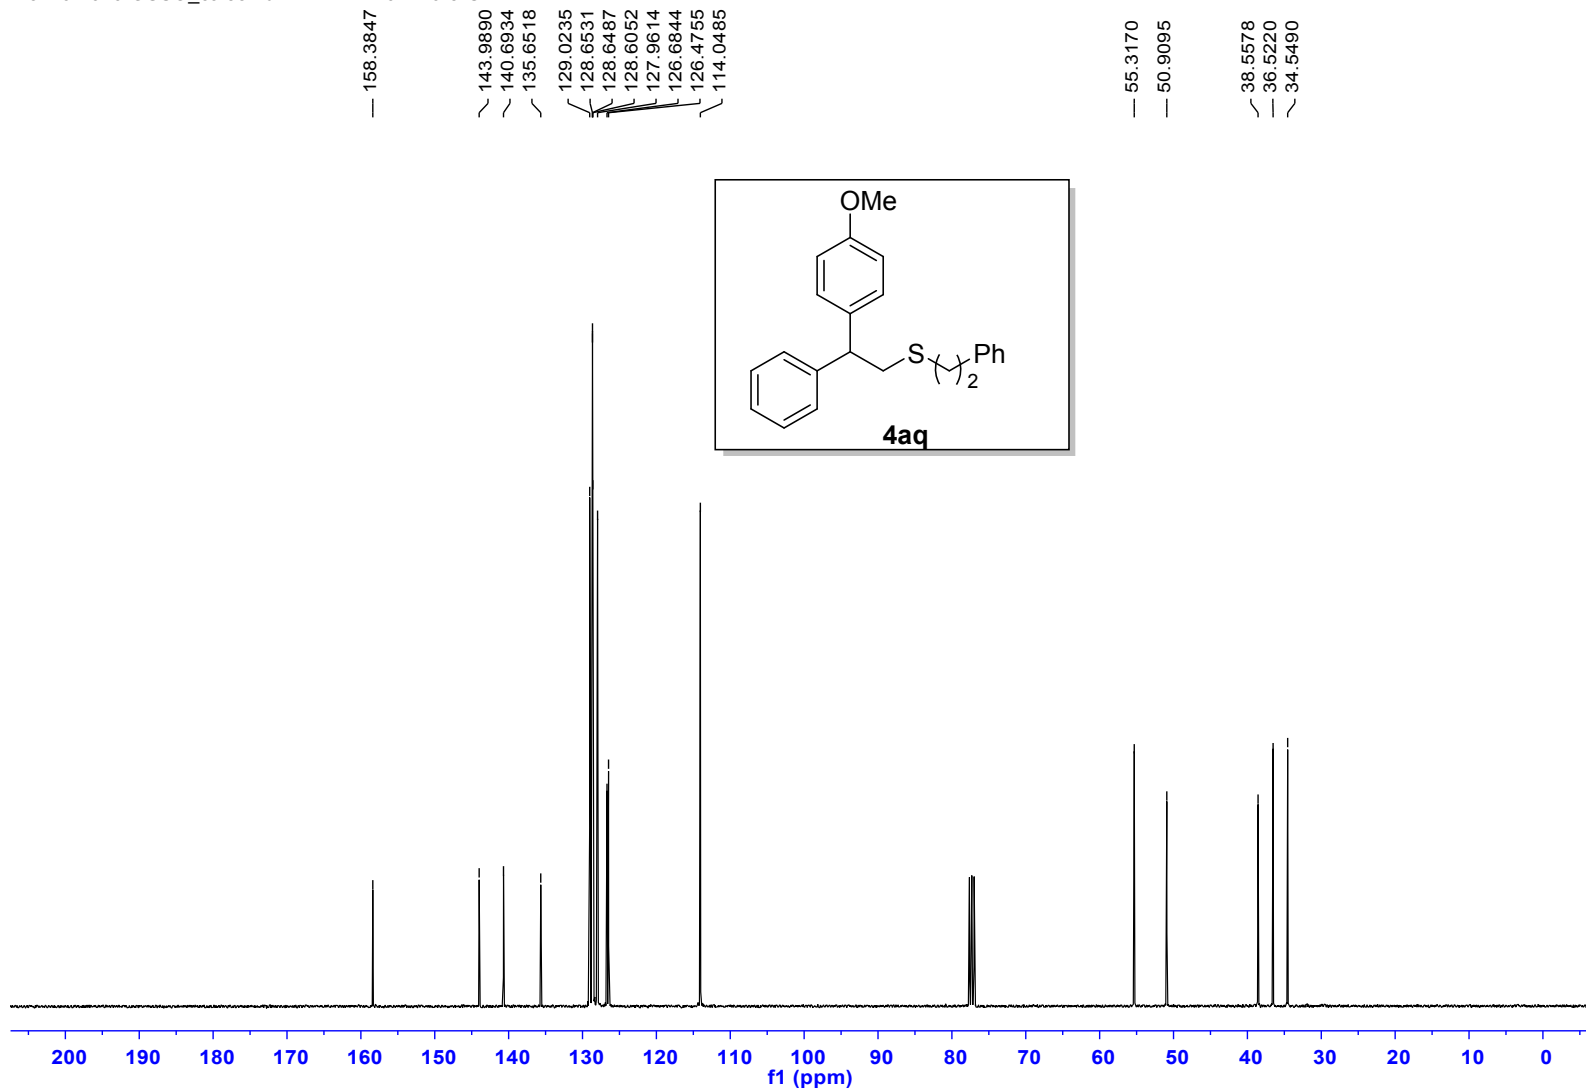

Nov23-2020-OSSO\_cj.4.fid — WYN-X201123-1

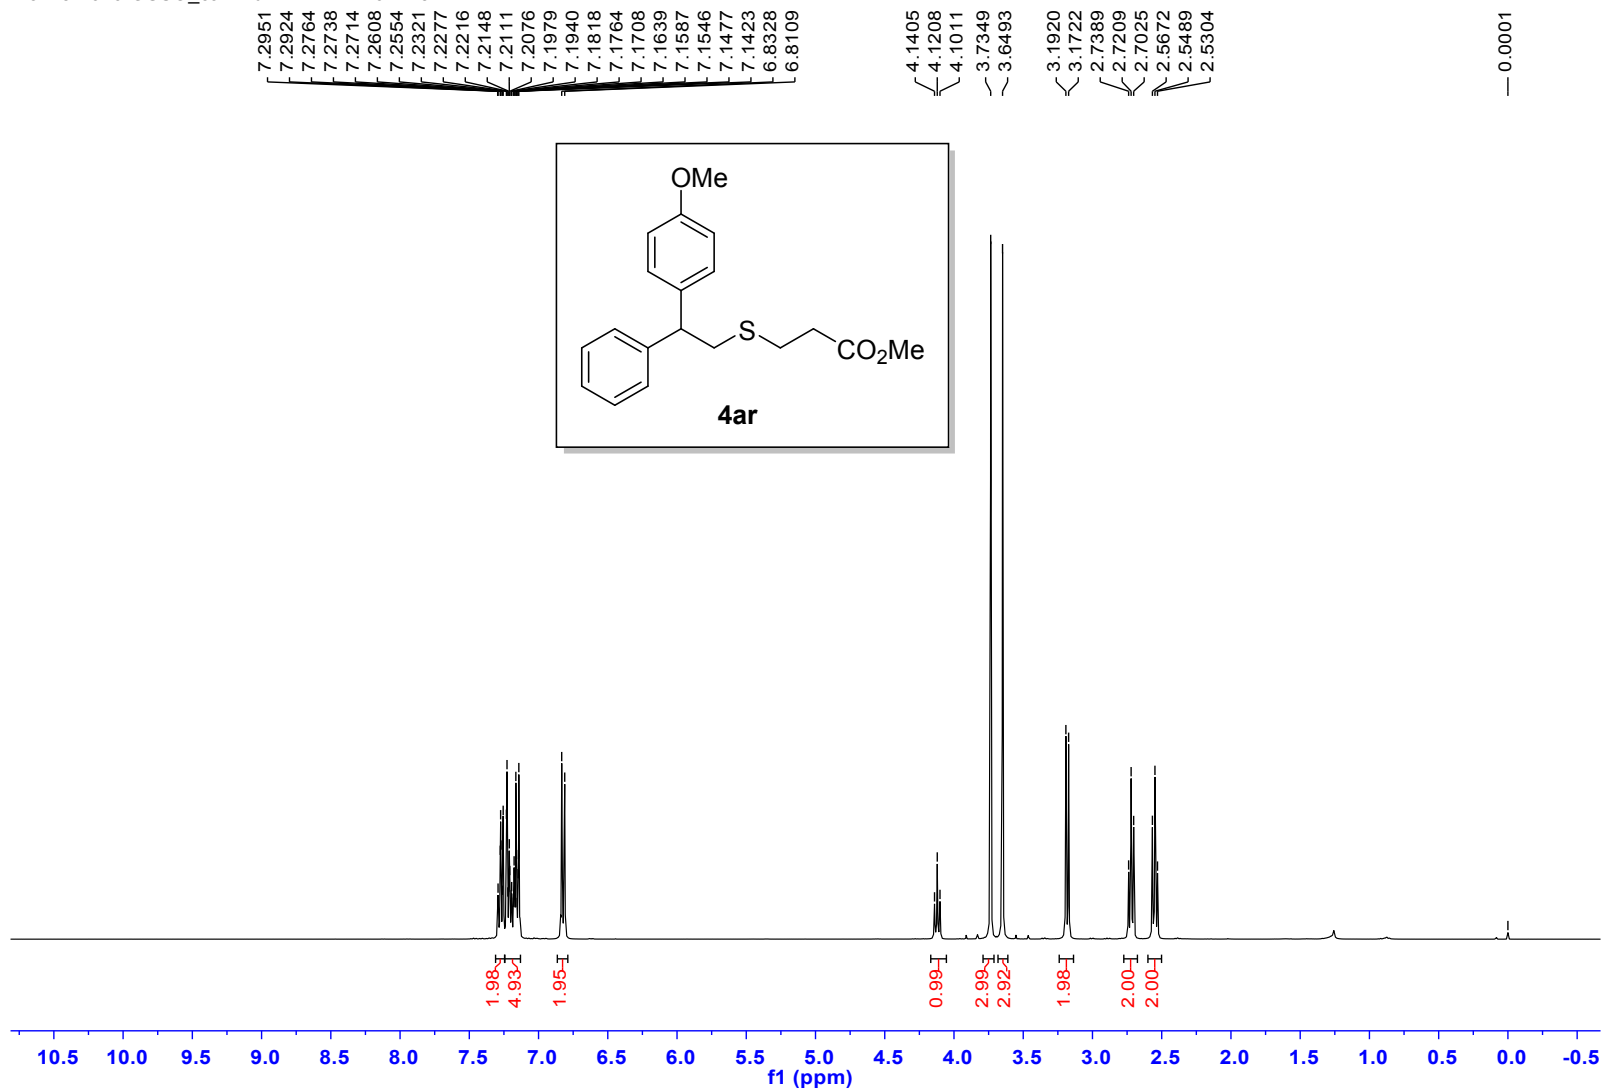

Nov23-2020-OSSO\_cj.38.fid — WYN-X201123-1

— 172.3669

— 158.3045

— 143.7063

— 135.3799

— 128.8887

— 128.5723

— 127.8202

— 126.6270

— 113.9505

— 55.2387

— 51.8276

— 50.6296

— 38.3605

— 34.6871

— 27.7908

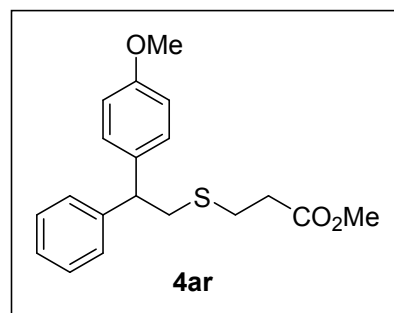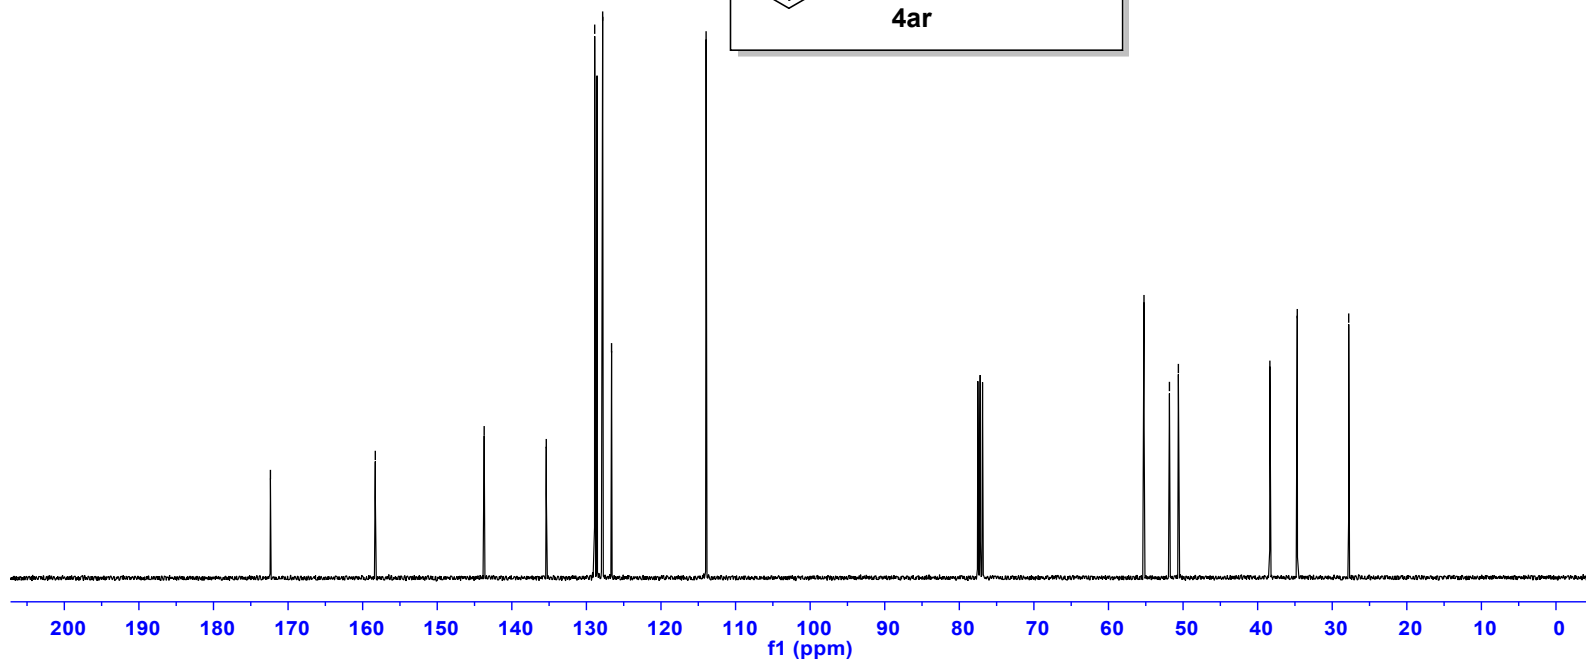

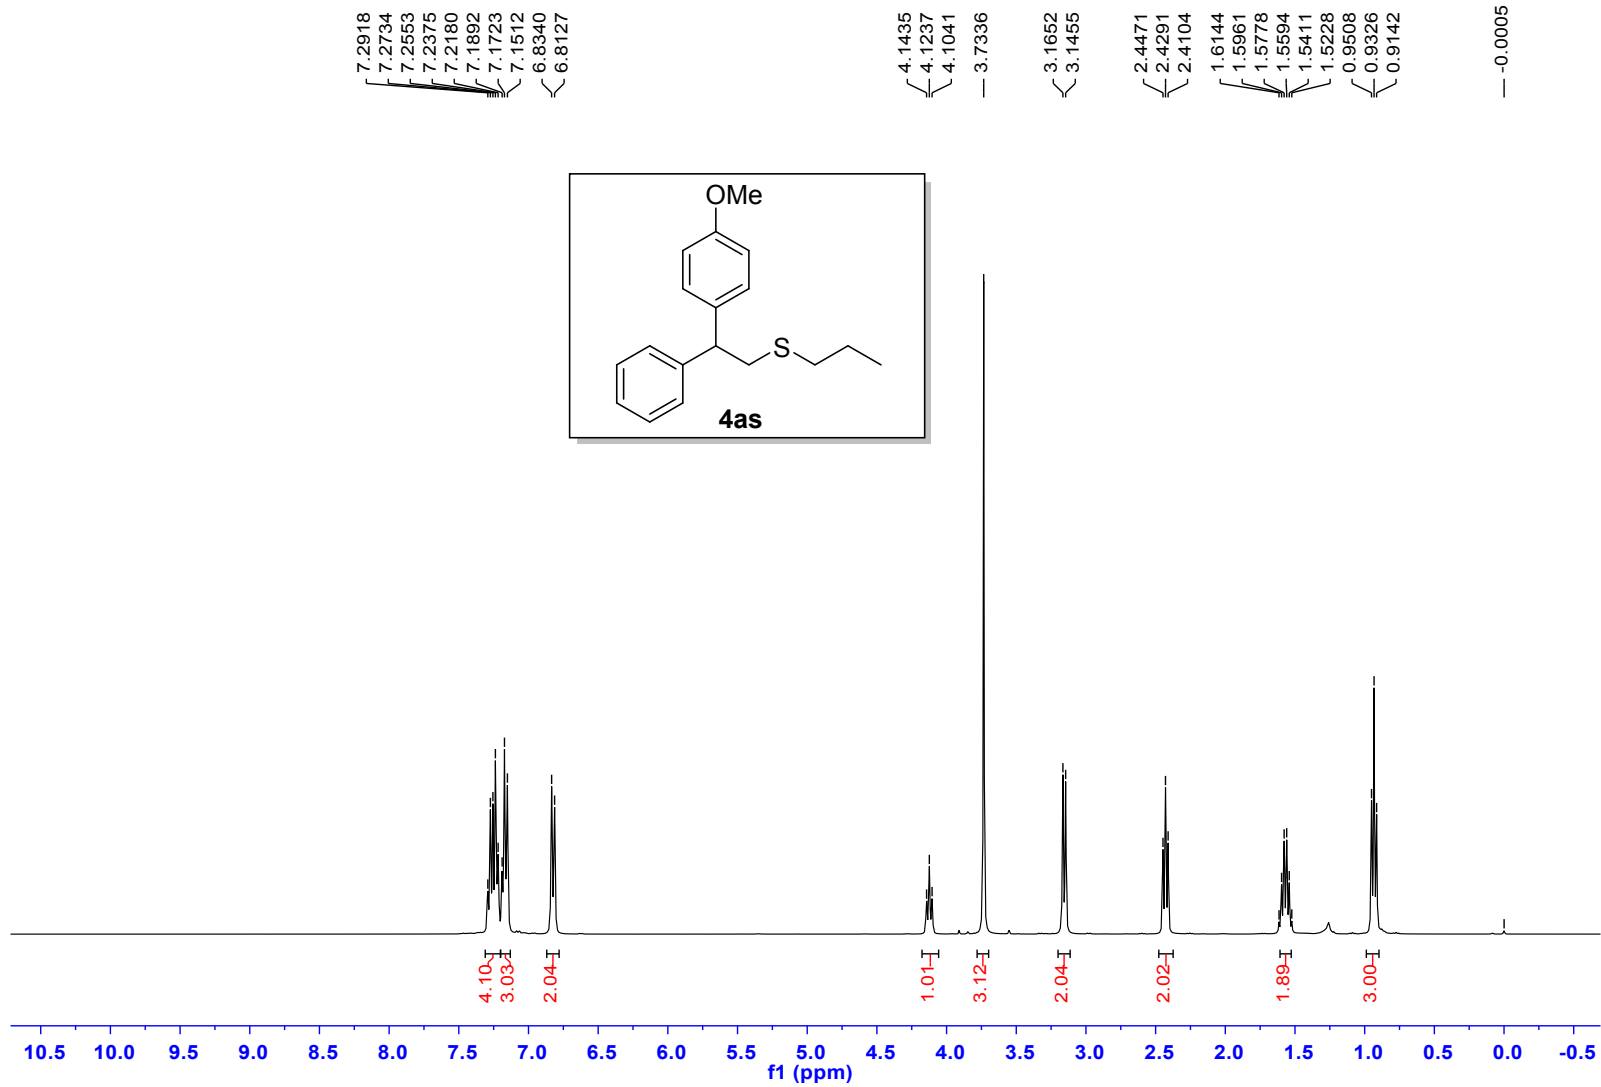

Nov30-2020-OSSO\_cj.15.fid — WYN-X201130-7

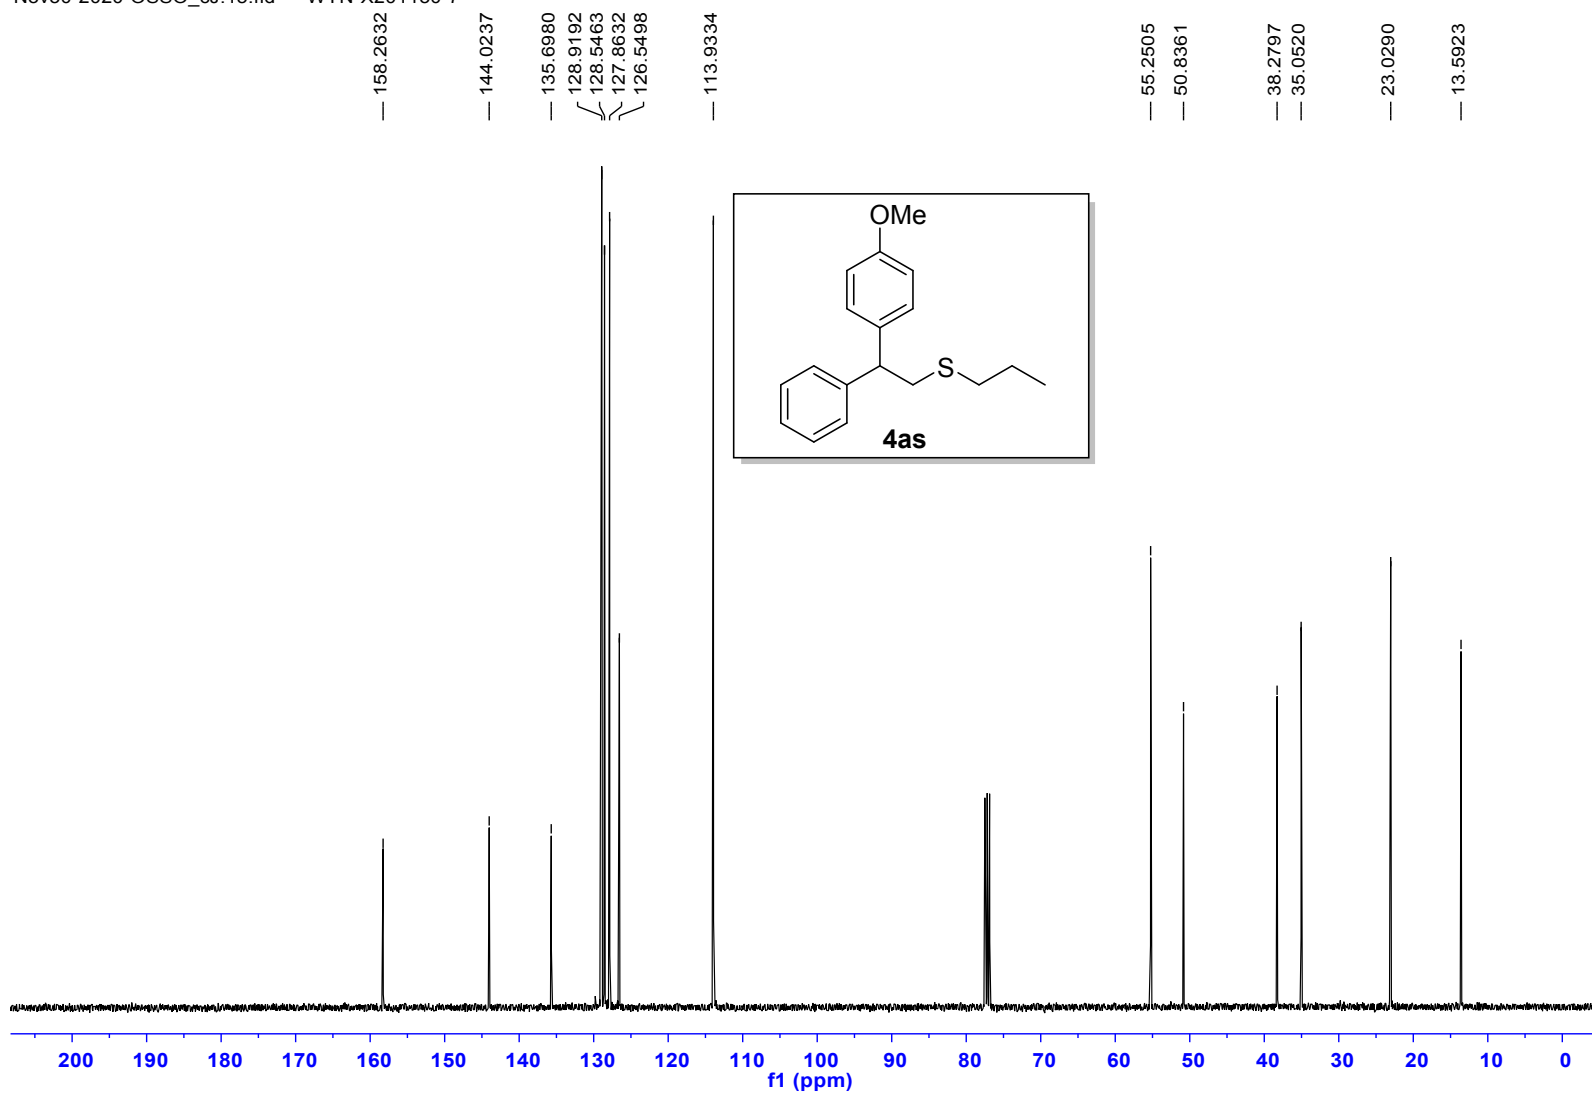

Nov30-2020-OSSO\_cj.9.fid — WYN-X201130-1

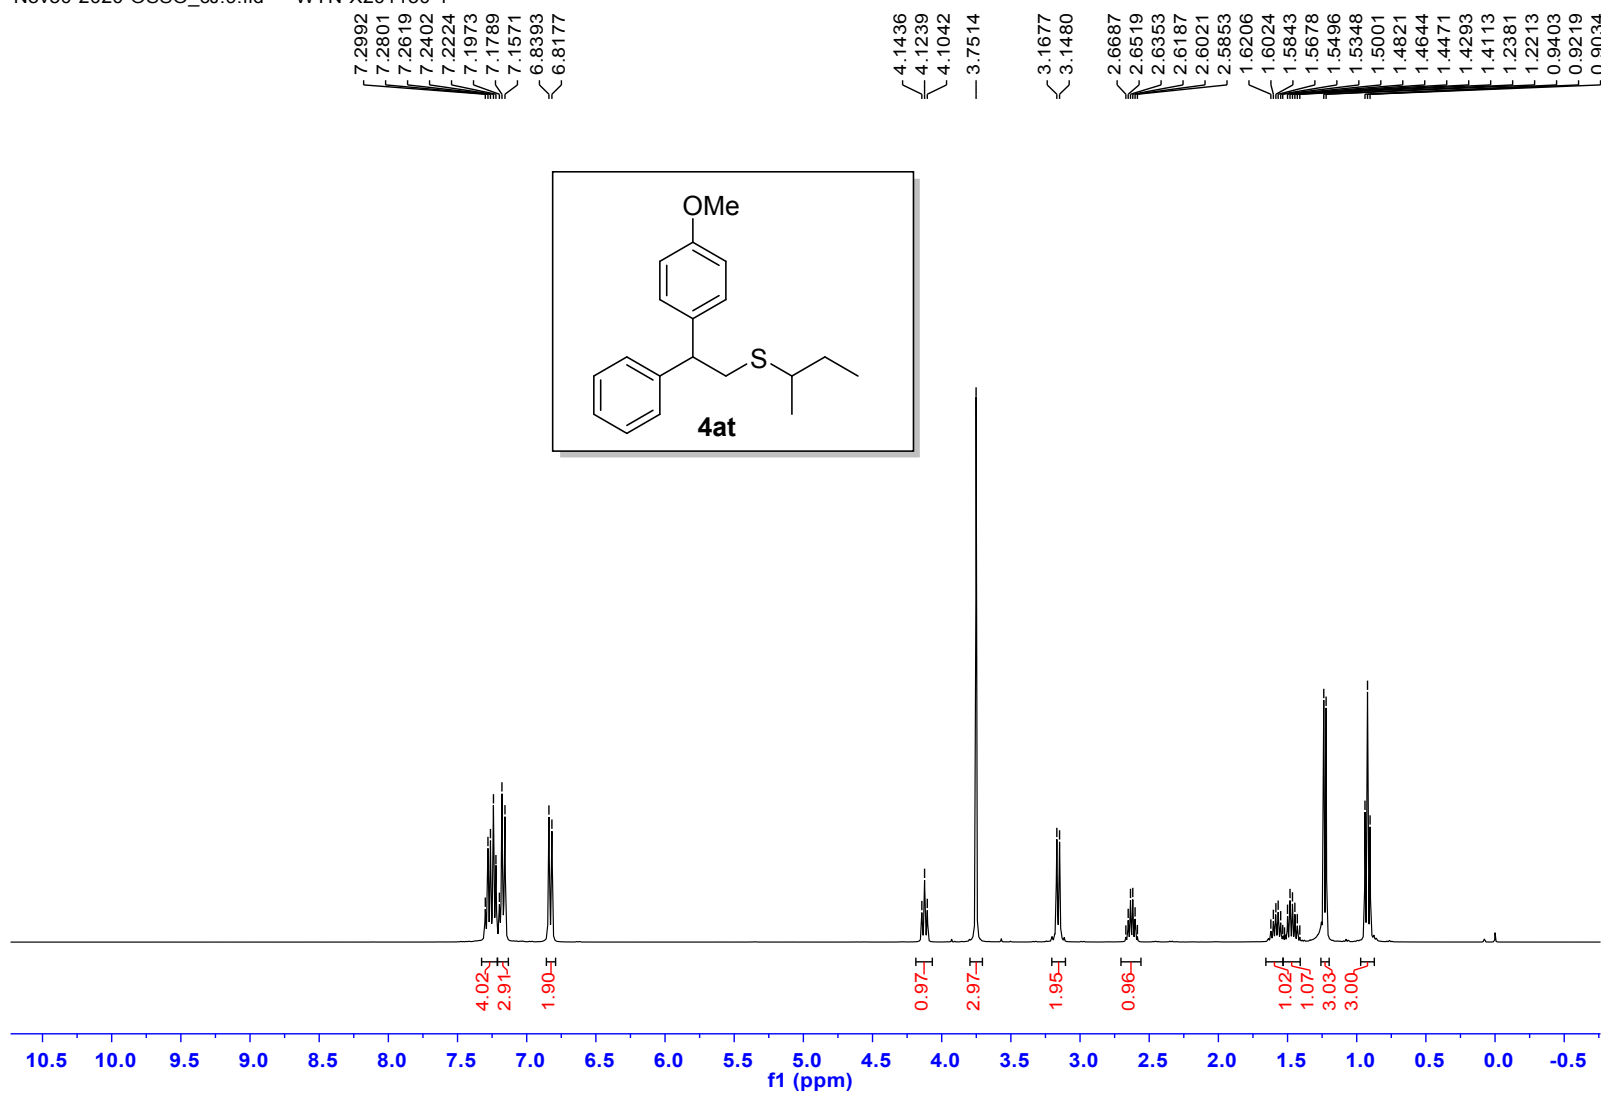

Dec04-2020-OSSO\_cj.12.fid — WYN-X201130-6-C

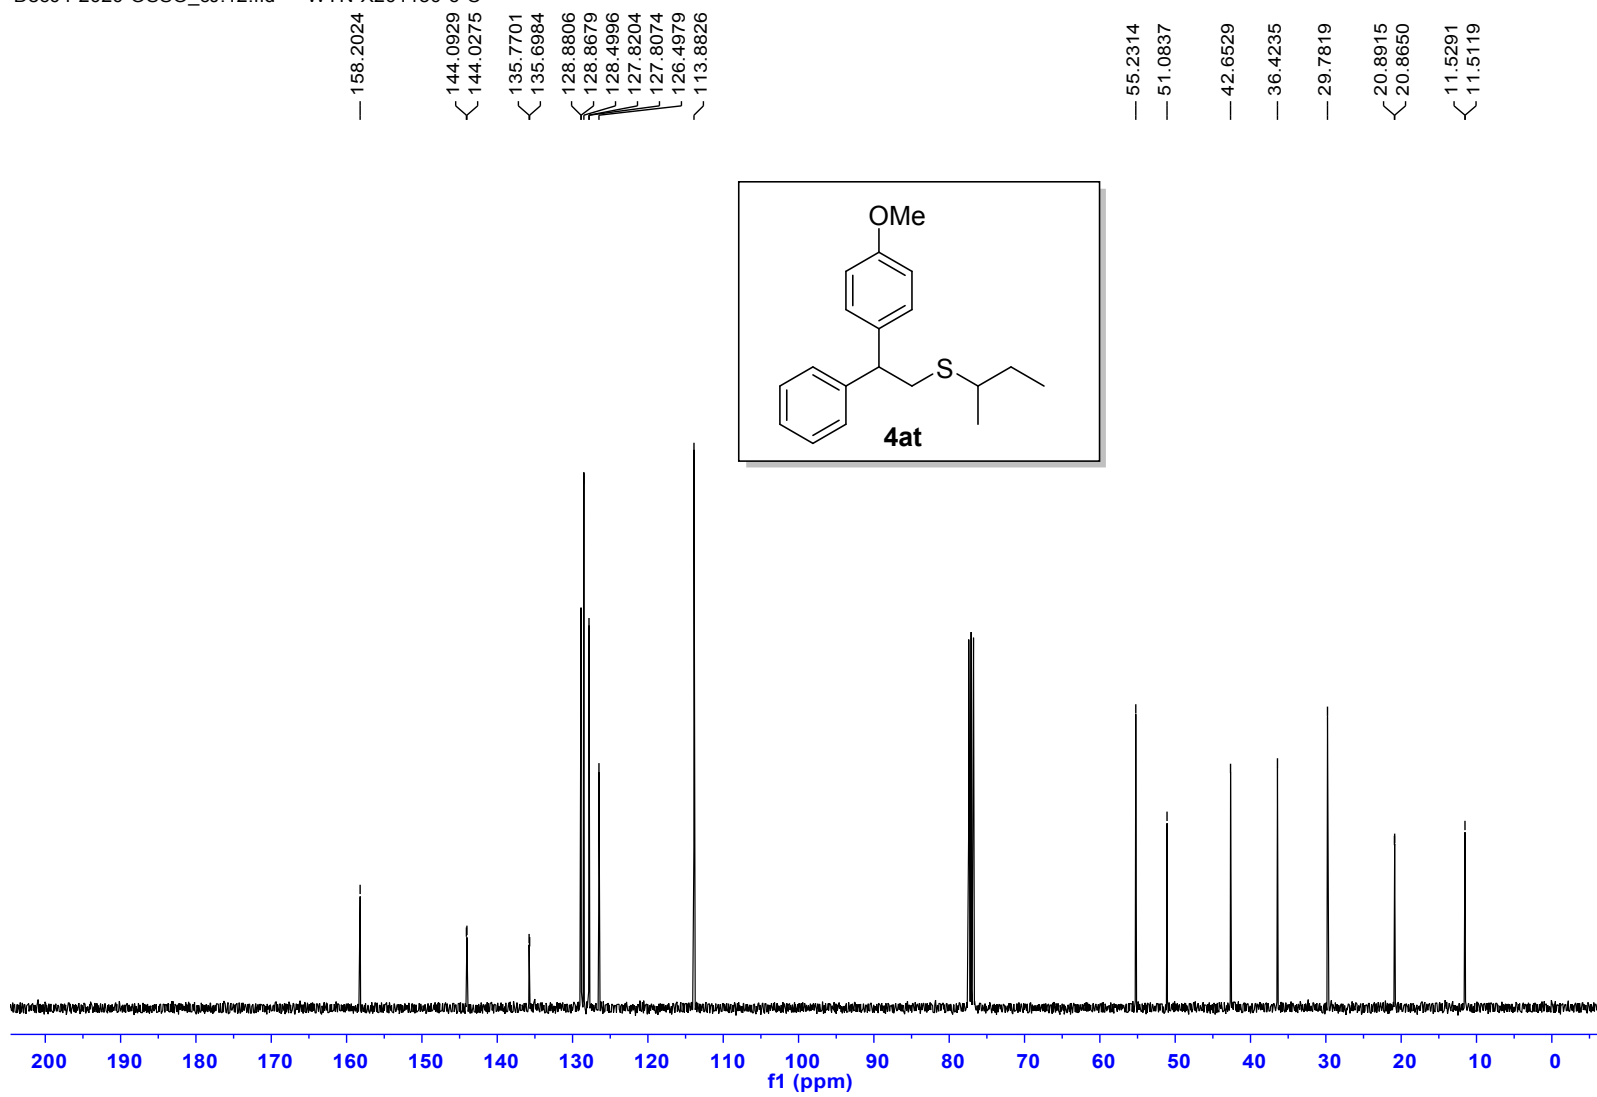

Nov30-2020-OSSO\_cj.10.fid — WYN-X201130-2

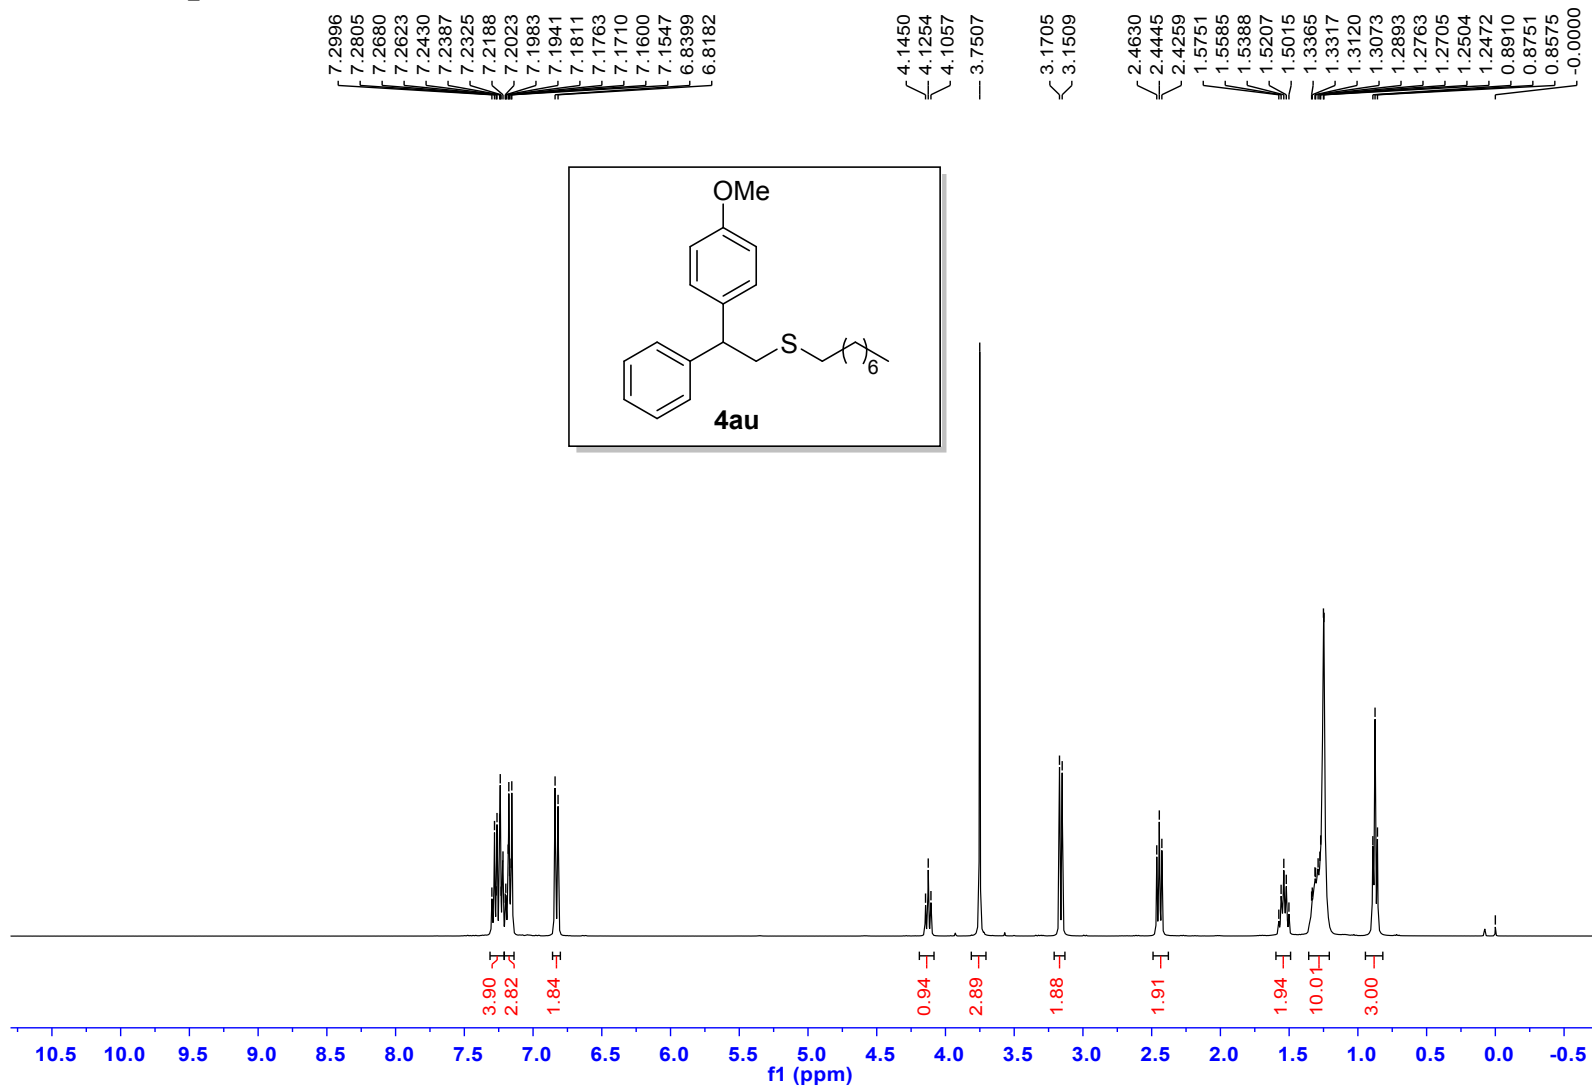



Dec01-2020-OSSO\_cj.9.fid — wyn-x201201-3

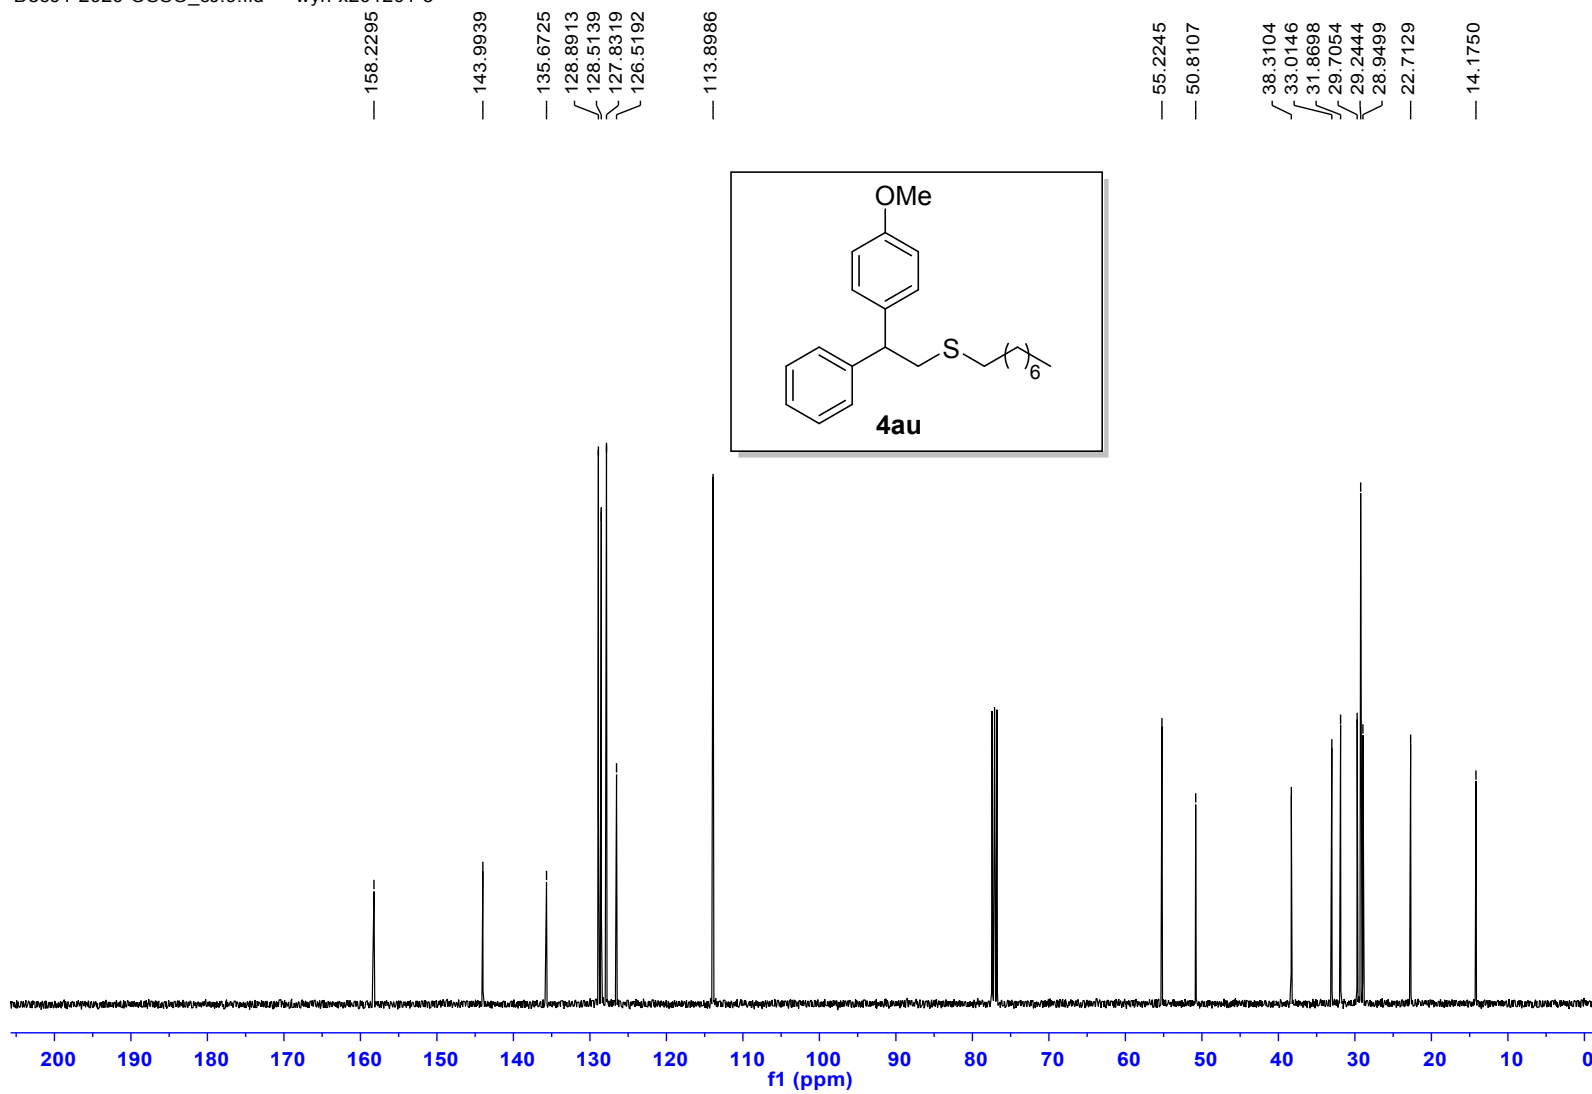

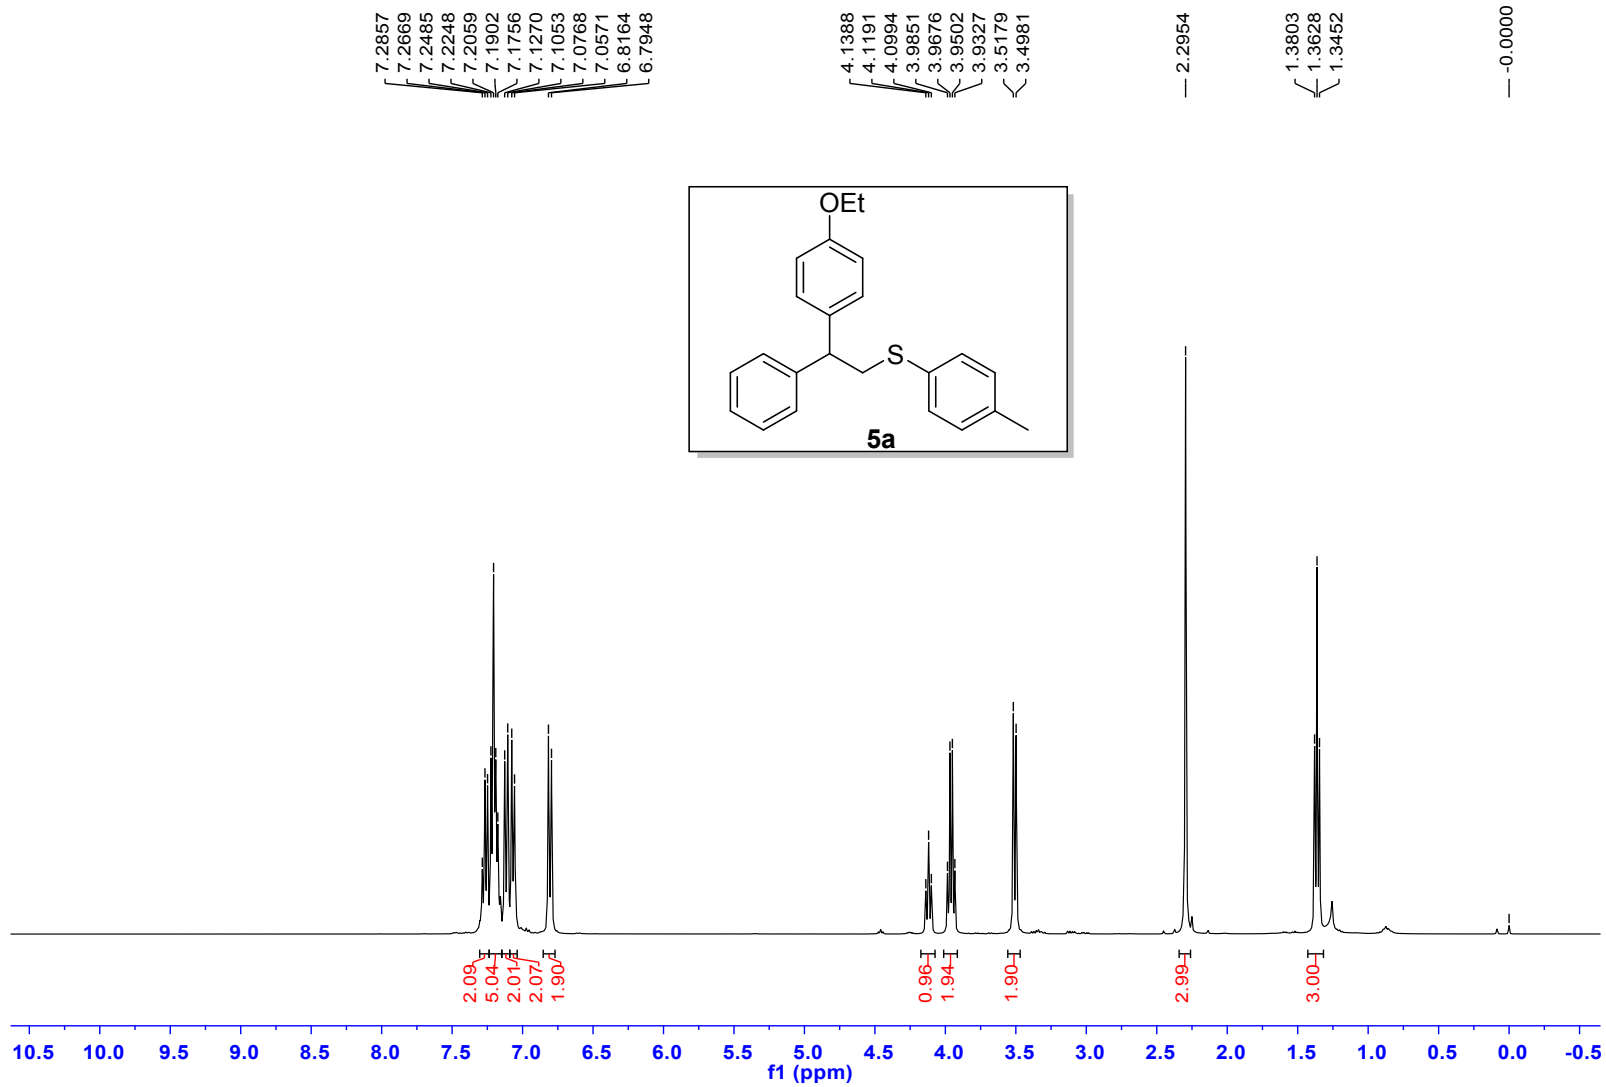

Nov24-2020-OSSO\_cj.4.fid — WYN-X201124-1

— 157.7202  
— 143.6378  
— 136.2375  
— 135.1401  
— 132.8875  
— 130.2775  
— 129.7823  
— 128.9784  
— 128.5863  
— 127.9512  
— 126.6316  
— 114.5102

— 63.4113

— 49.8217

— 40.6439

— 21.1234

— 14.9776

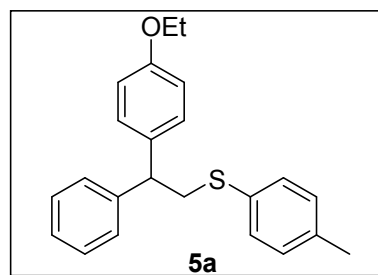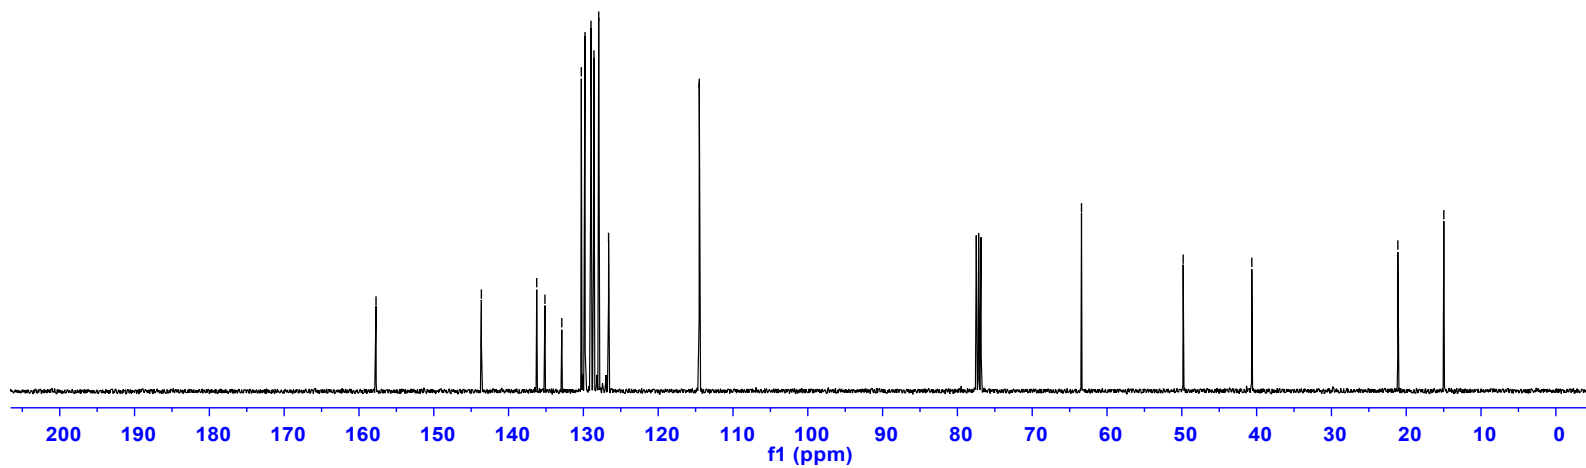

Nov23-2020-OSSO\_cj.8.fid — WYN-X201123-5

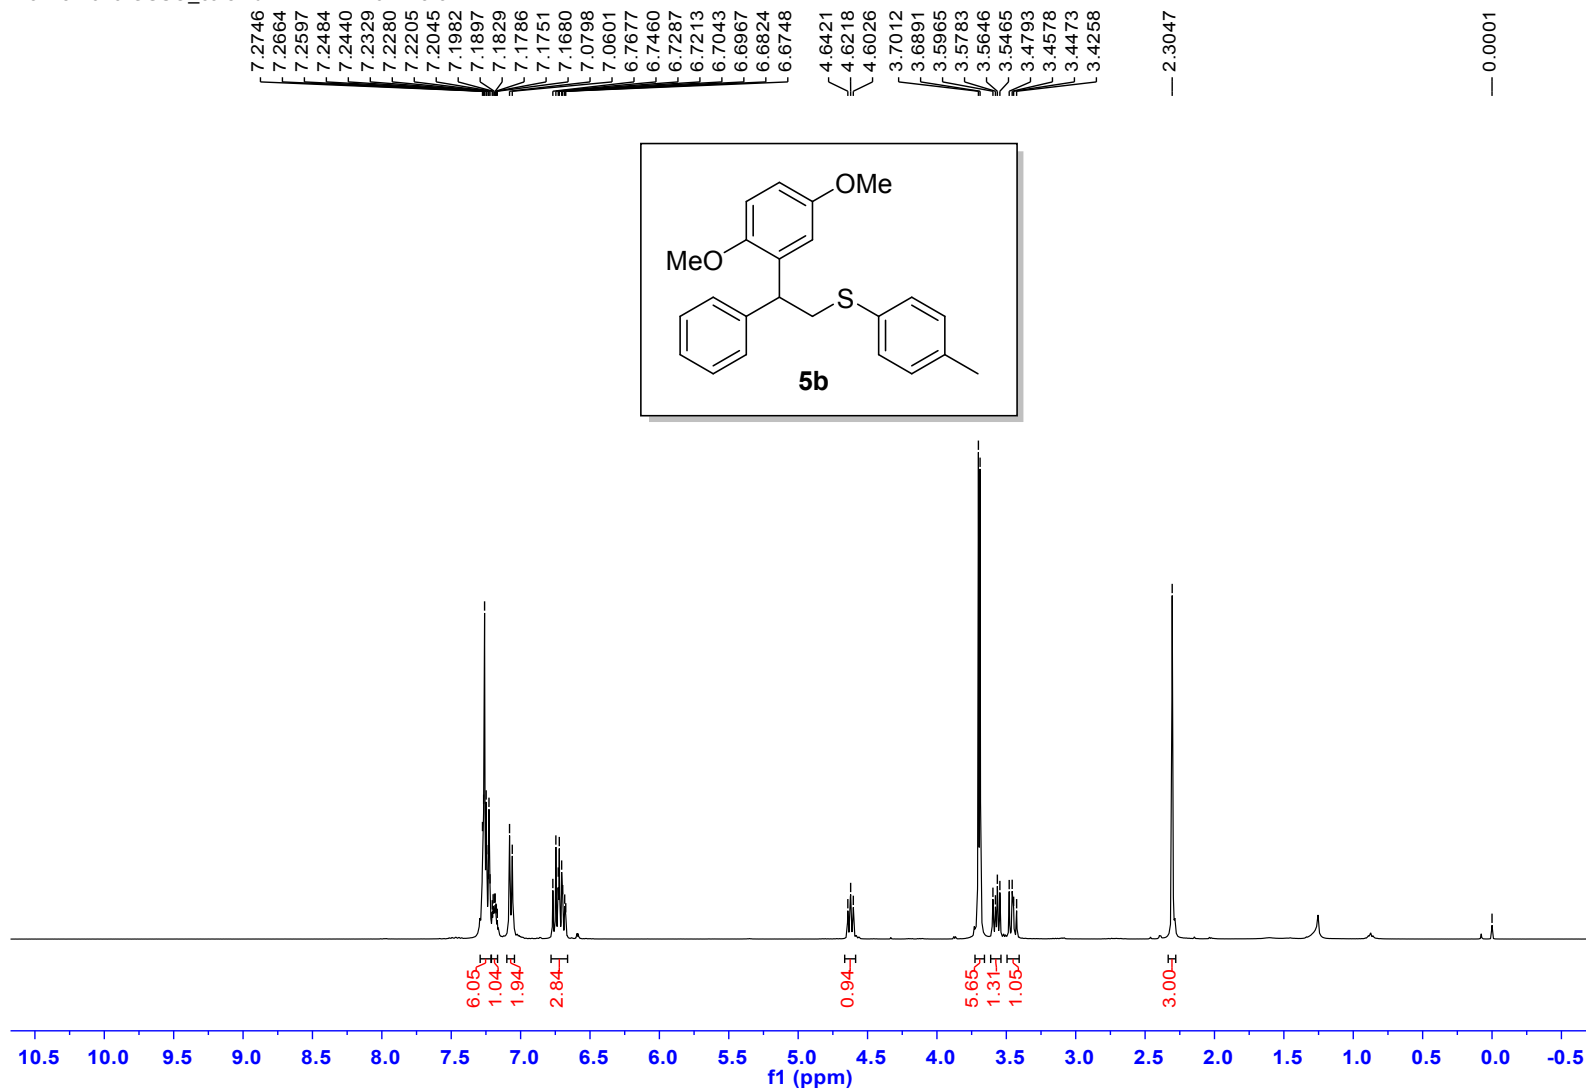

Nov23-2020-OSSO\_cj.40.fid — WYN-X201123-5

153.5409  
151.4044  
142.5032  
135.9648  
133.1529  
133.0034  
130.1062  
129.5818  
128.4148  
128.3528  
126.5010  
115.2655  
111.8092  
111.1675

56.0809  
55.6300

43.8966  
39.0933

21.0687

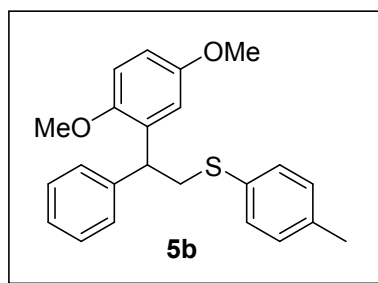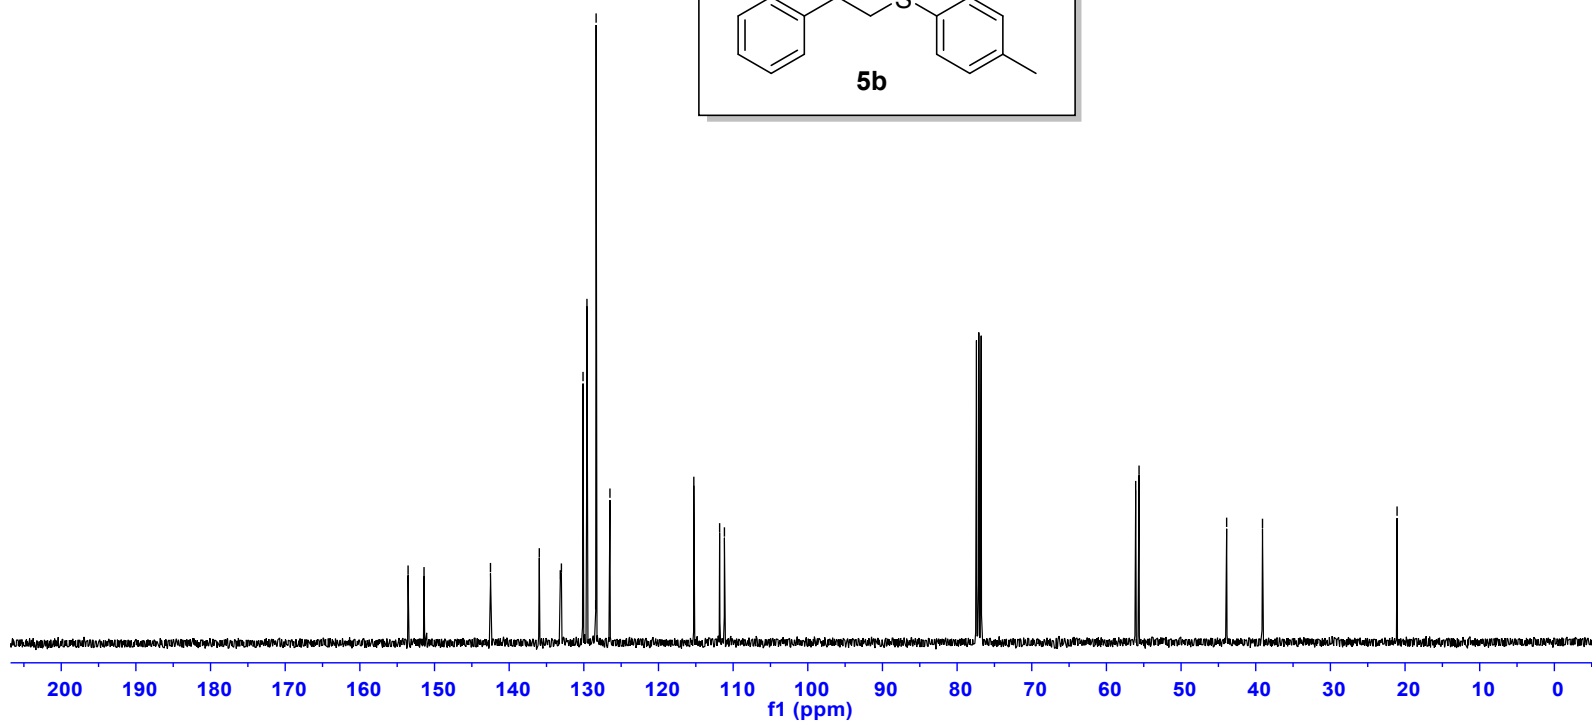

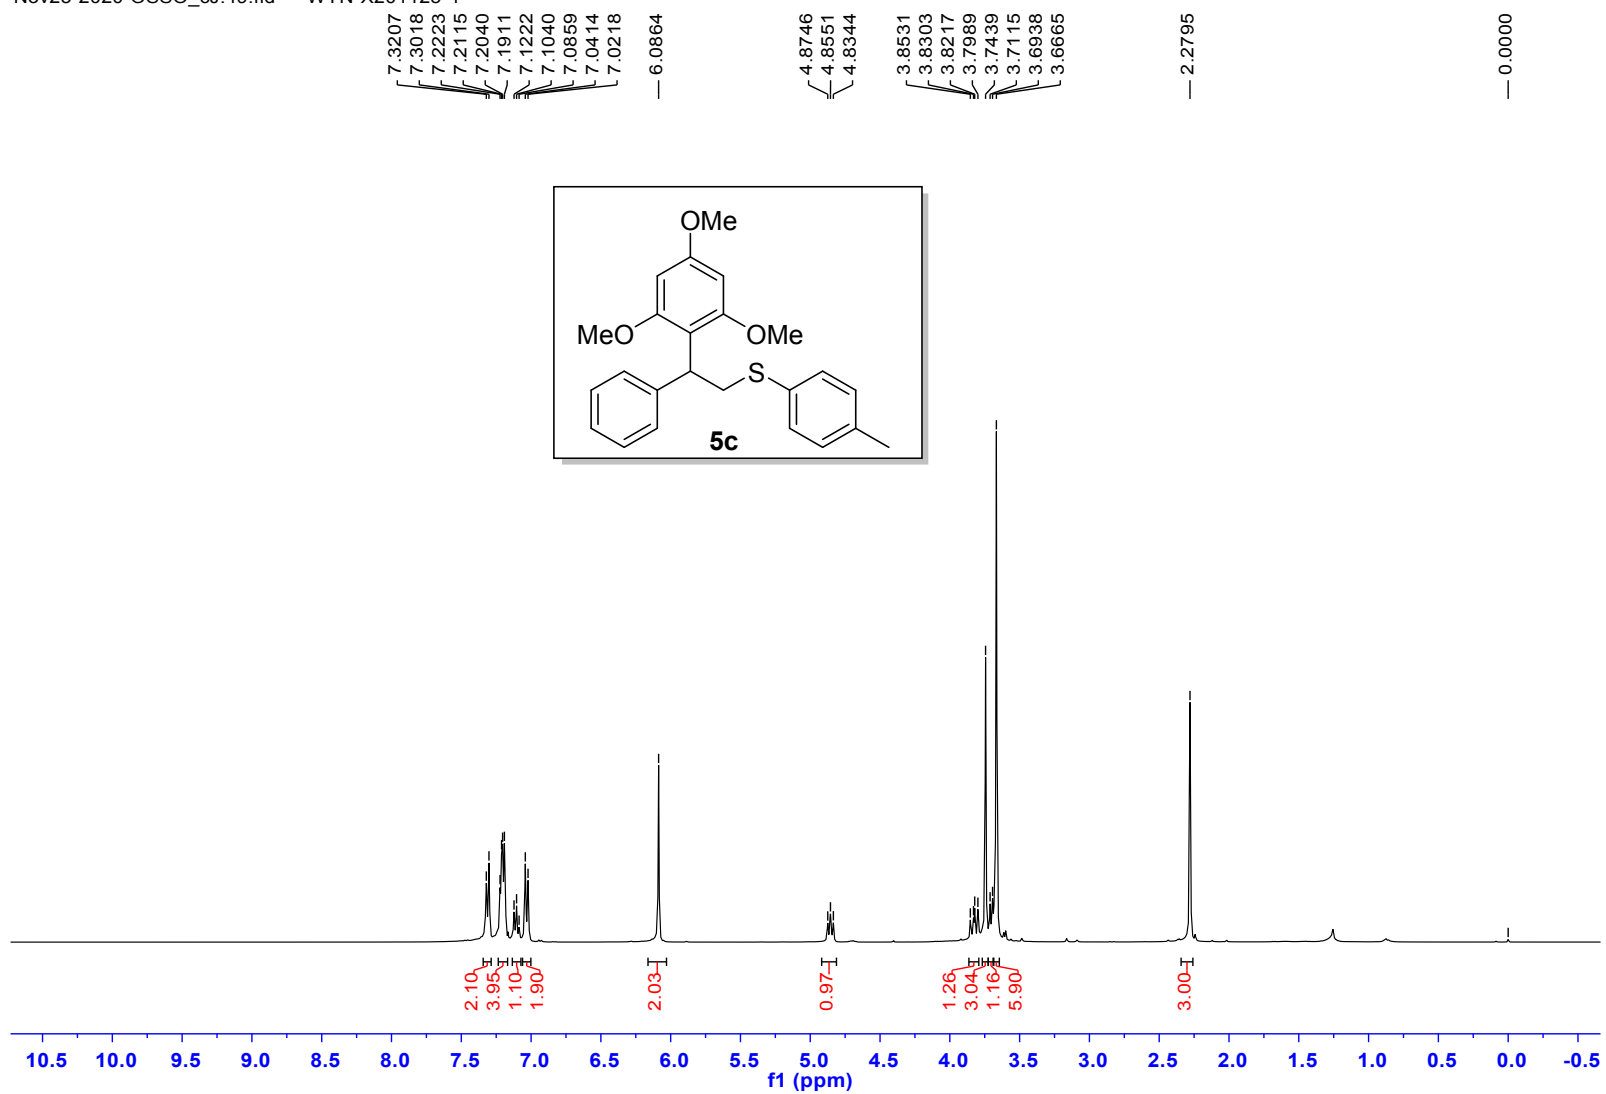

Nov27-2020-OSSO\_cj.12.fid — WYN-X201127-6

159.9521  
159.2946

143.9040

135.5631  
133.6588  
130.0626  
129.3983  
128.0240  
127.8387  
125.7235

112.0222

91.1864

55.6922  
55.2456

39.5156  
37.6840

21.0578

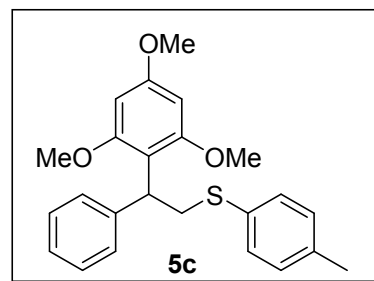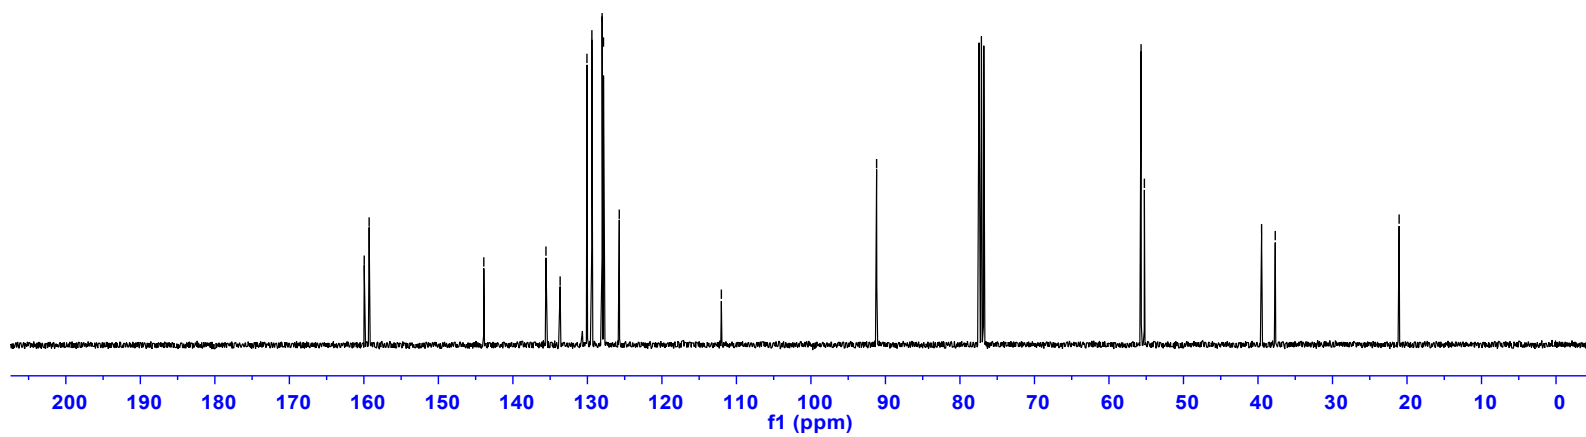

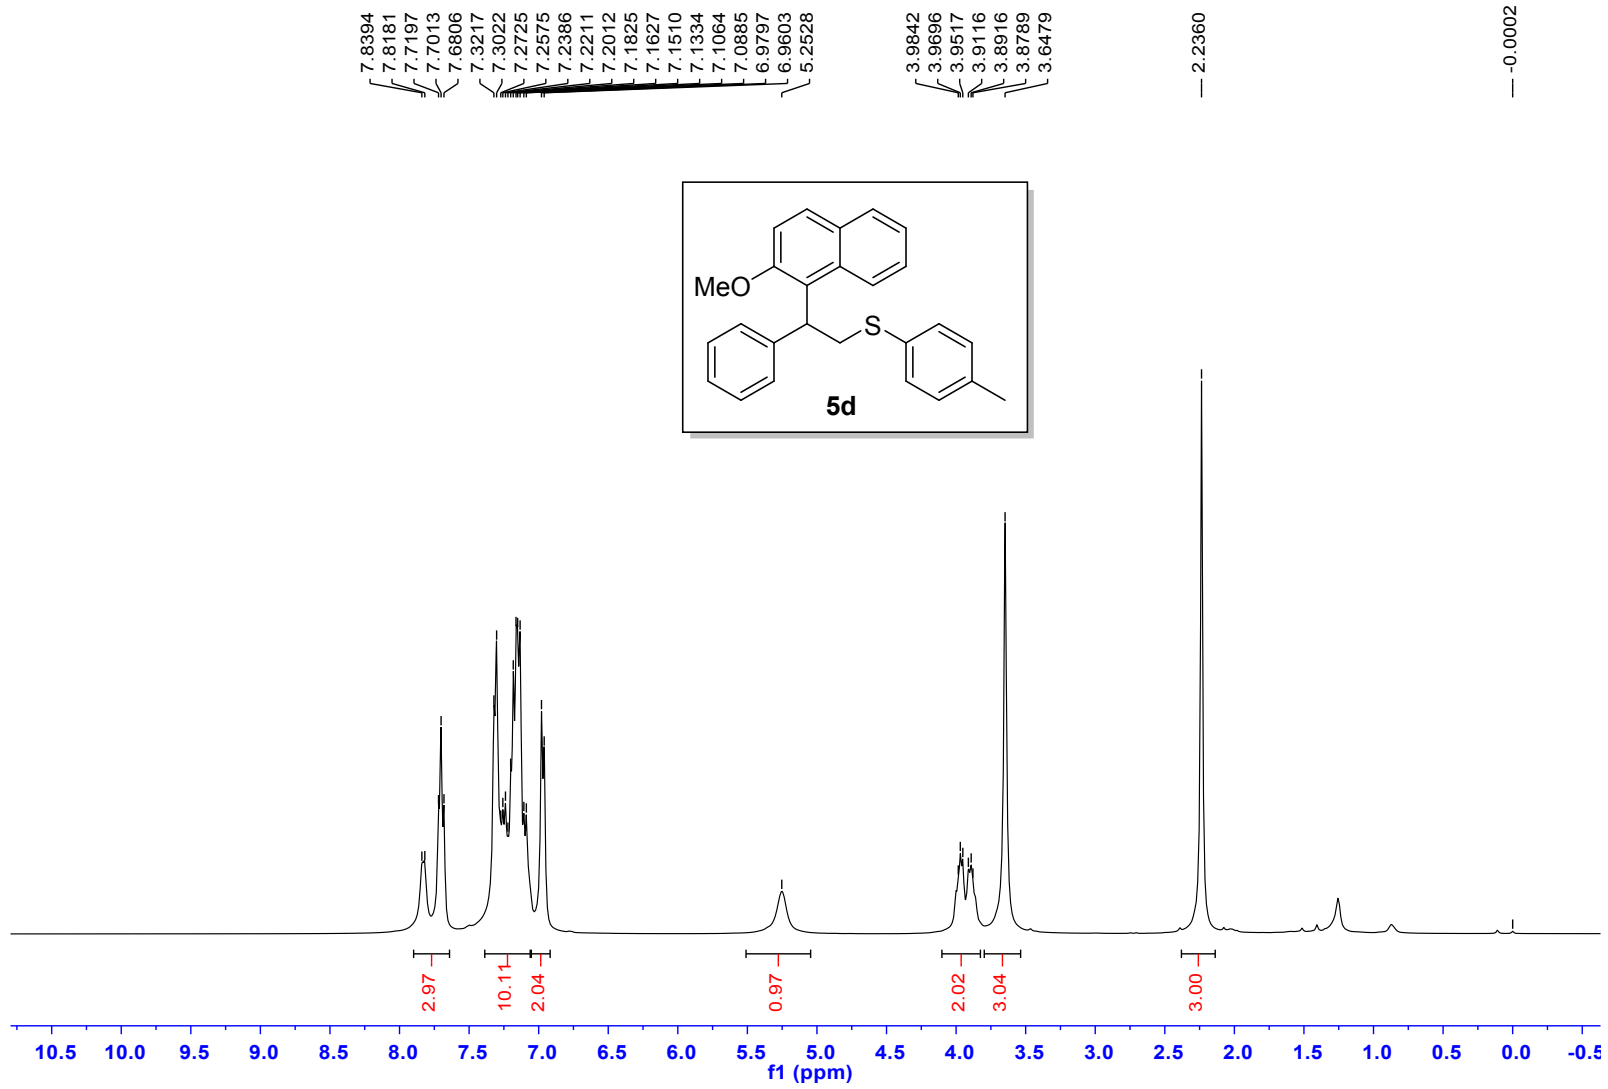



Nov30-2020-OSSO\_cj.11.fid — WYN-X201130-3

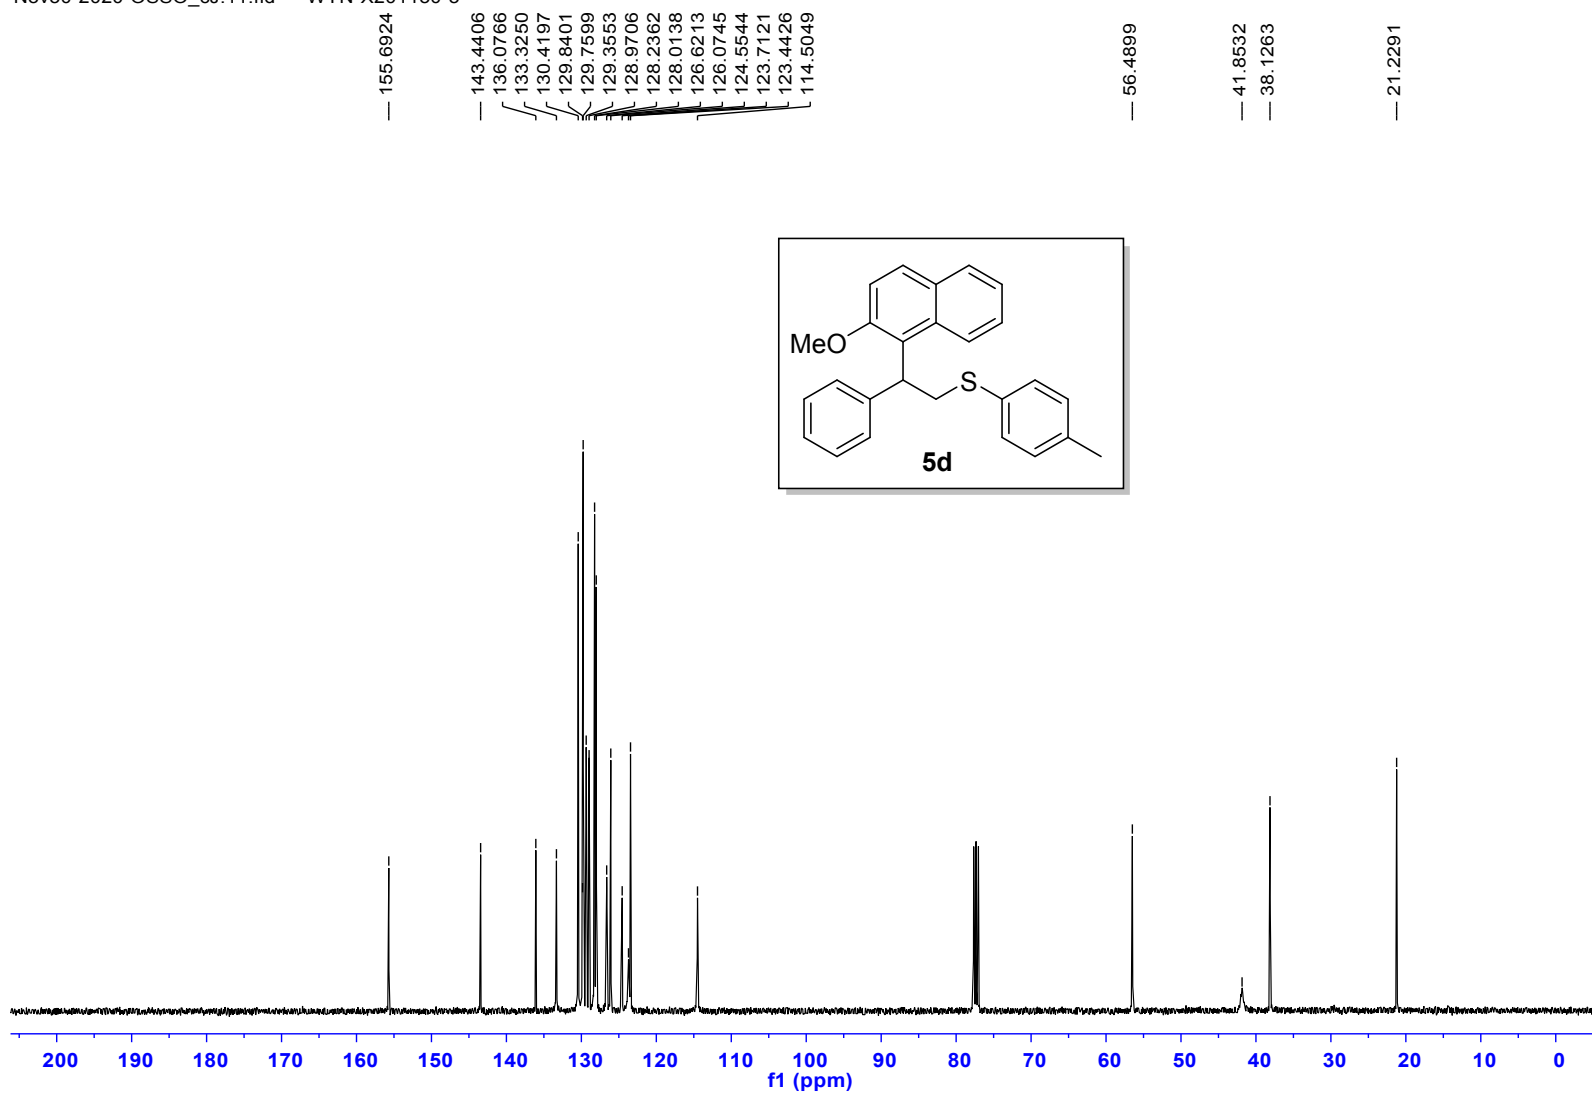

Nov12-2020-OSSO\_cj.5.fid — WYN-X201112-2

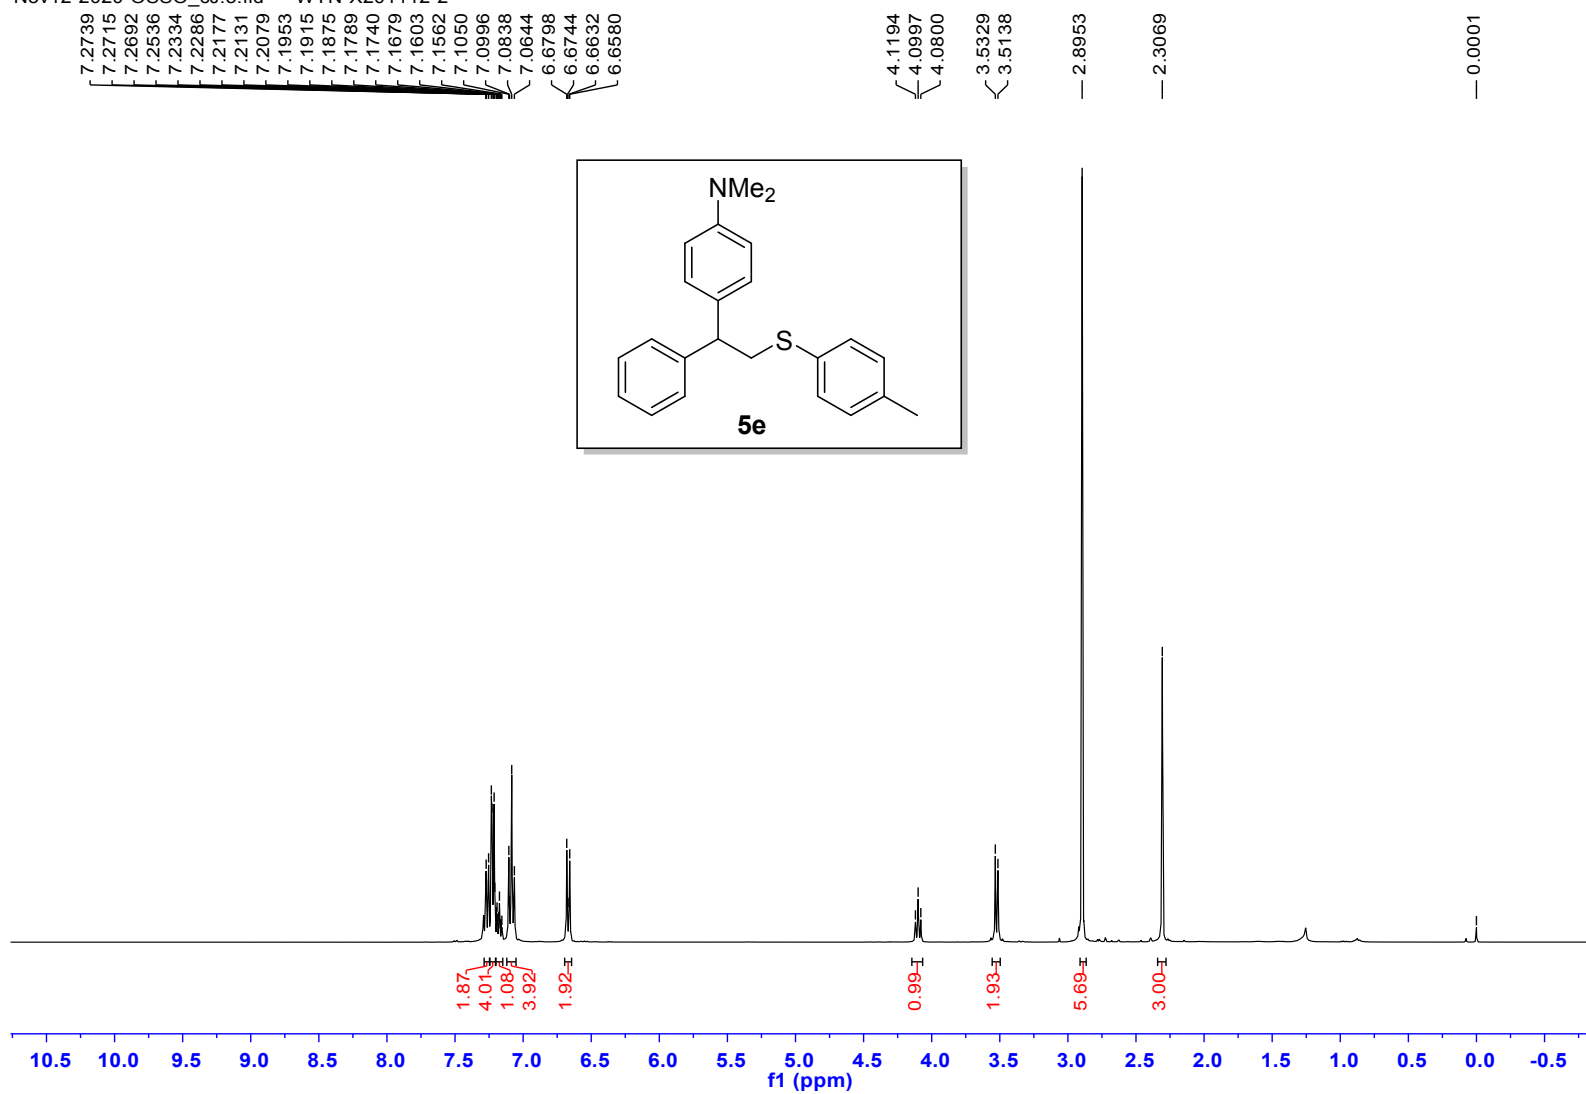

Nov12-2020-OSSO\_cj.50.fid — WYN-X201112-2-C

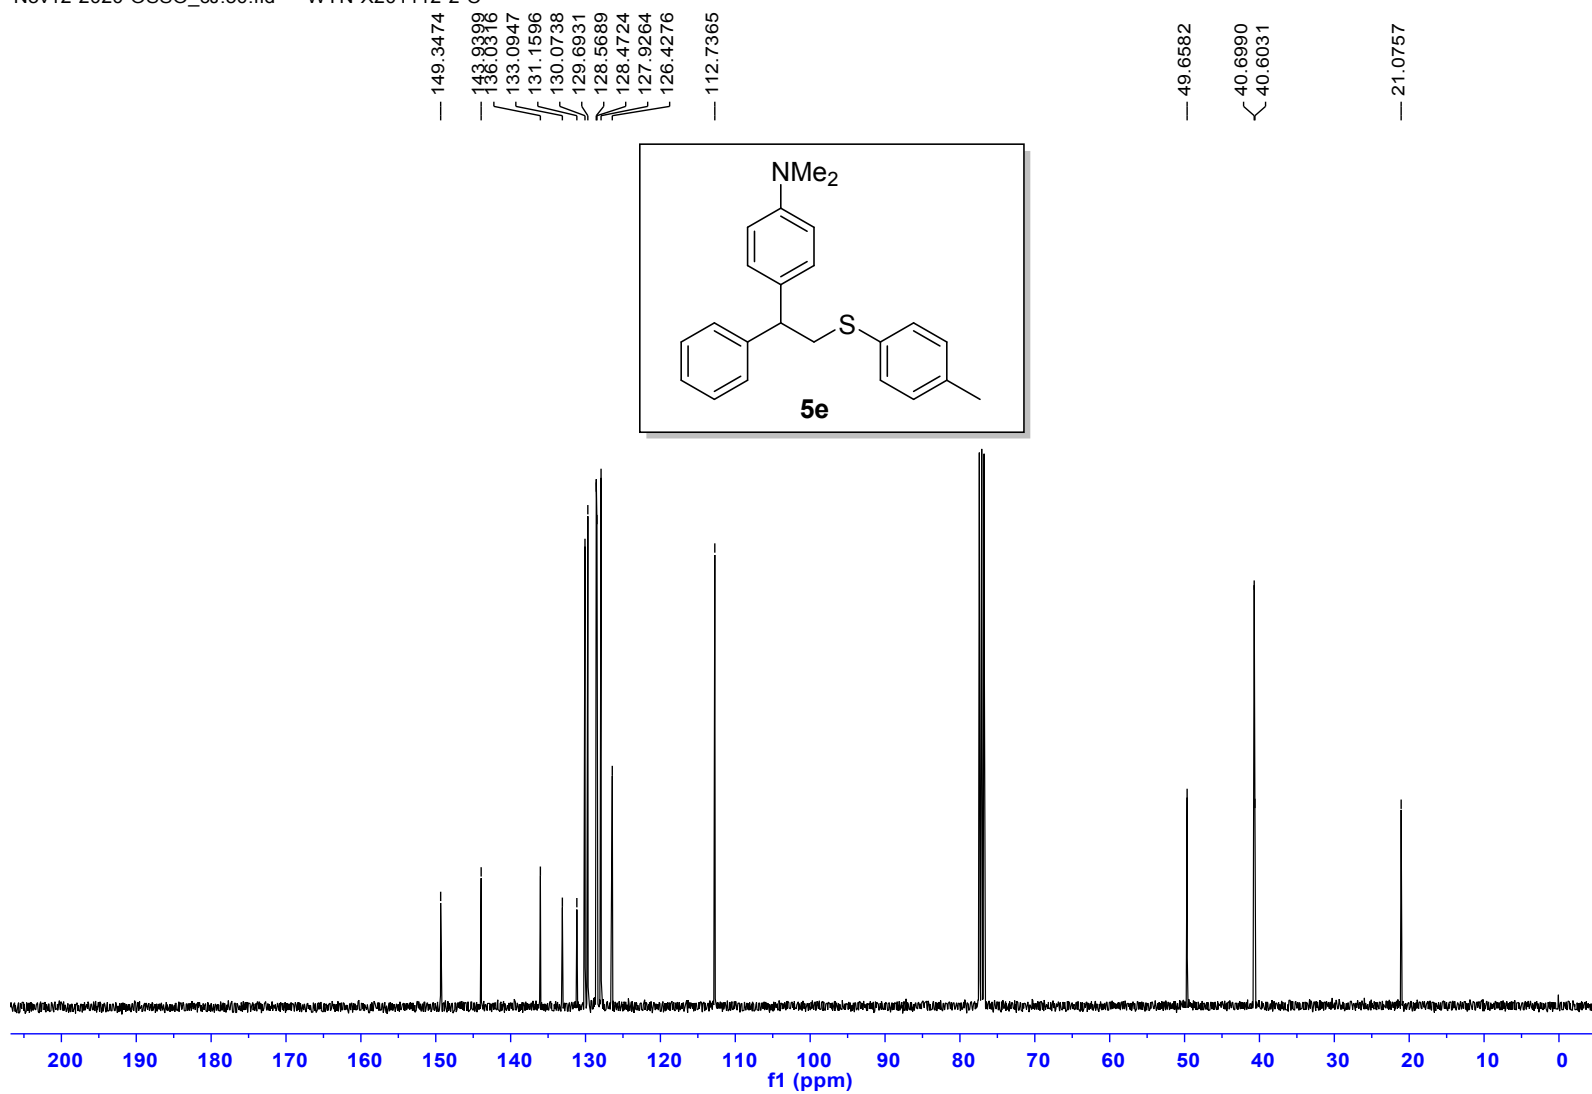

Jun21-2021-OSSO\_cJ.4.fid — WYN-X210621-4

7.8596  
7.8388  
7.6748  
7.6546  
7.4521  
7.1812  
7.1627  
7.1524  
7.1458  
7.1362  
7.1171  
7.1073  
7.1056  
7.0856  
7.0485  
7.0288  
6.9984  
6.9798  
6.9631  
6.9440

4.2199  
4.2011  
4.1824  
3.5486  
3.5295  
3.5165  
3.4973  
3.3735  
3.3549  
3.3413  
3.3227

2.2190  
2.2136

0.0002

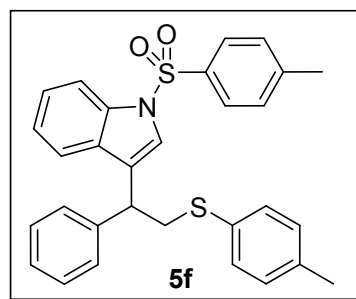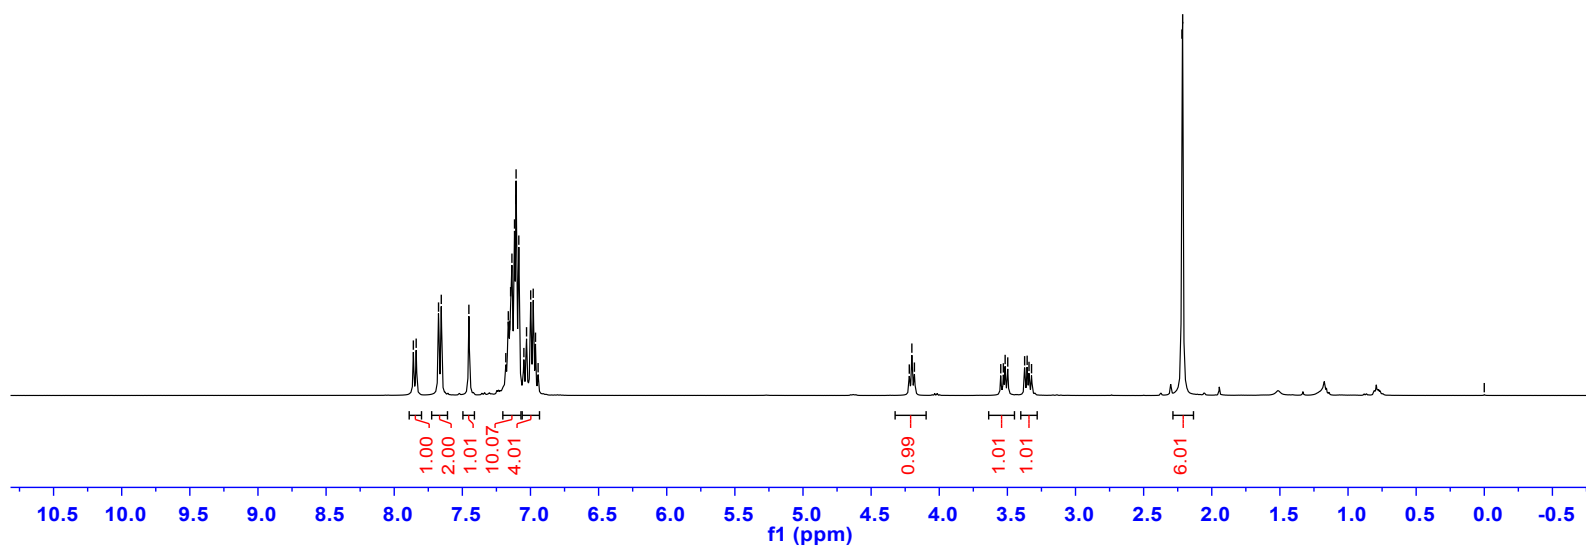

Jun21-2021-OSSO\_cj.63.fid — WYN-X210621-4-C

144.8768  
141.6833  
136.6705  
135.5537  
135.1326  
132.4458  
130.7282  
130.3753  
129.8508  
129.8328  
128.6628  
127.9294  
127.1089  
126.8760  
124.7841  
124.5498  
123.6353  
123.1778  
120.0090  
113.8290

42.4884  
40.5963

21.5968  
21.0936

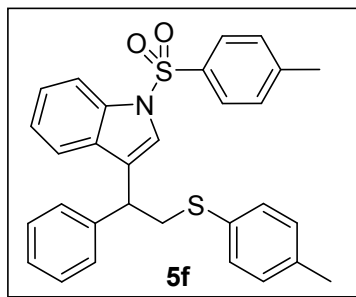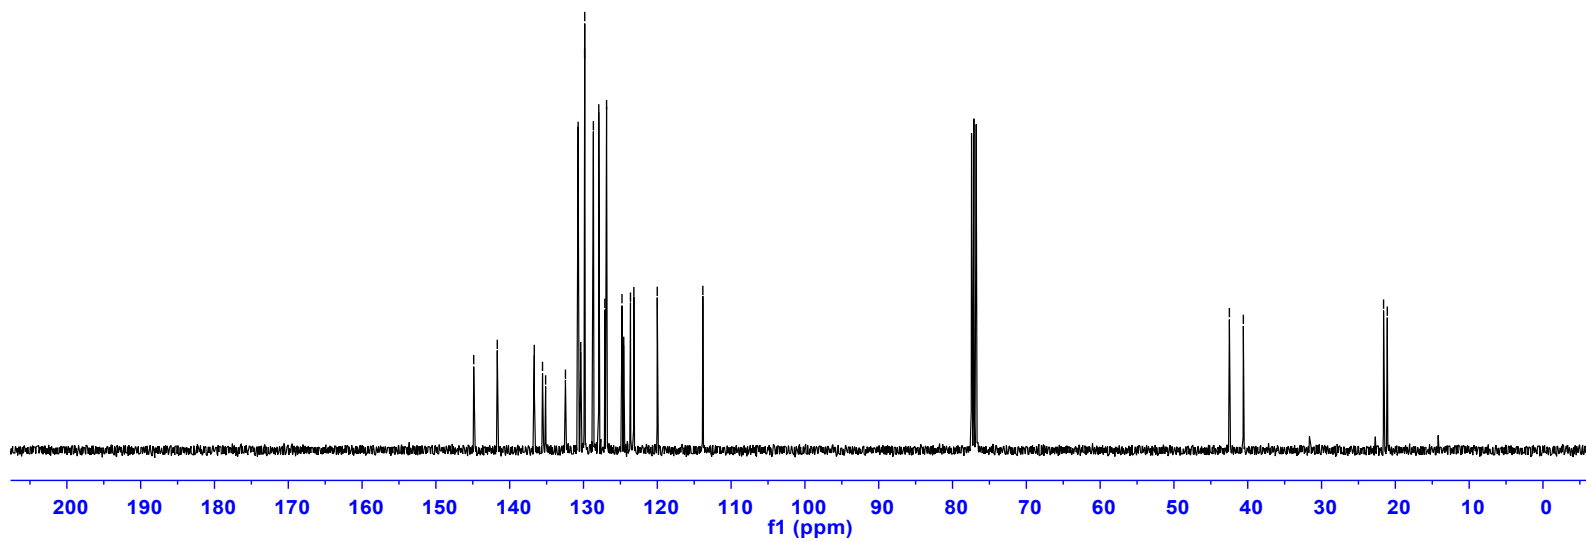

Jun21-2021-OSSO\_cj.3.fid — wyn-x210621-3

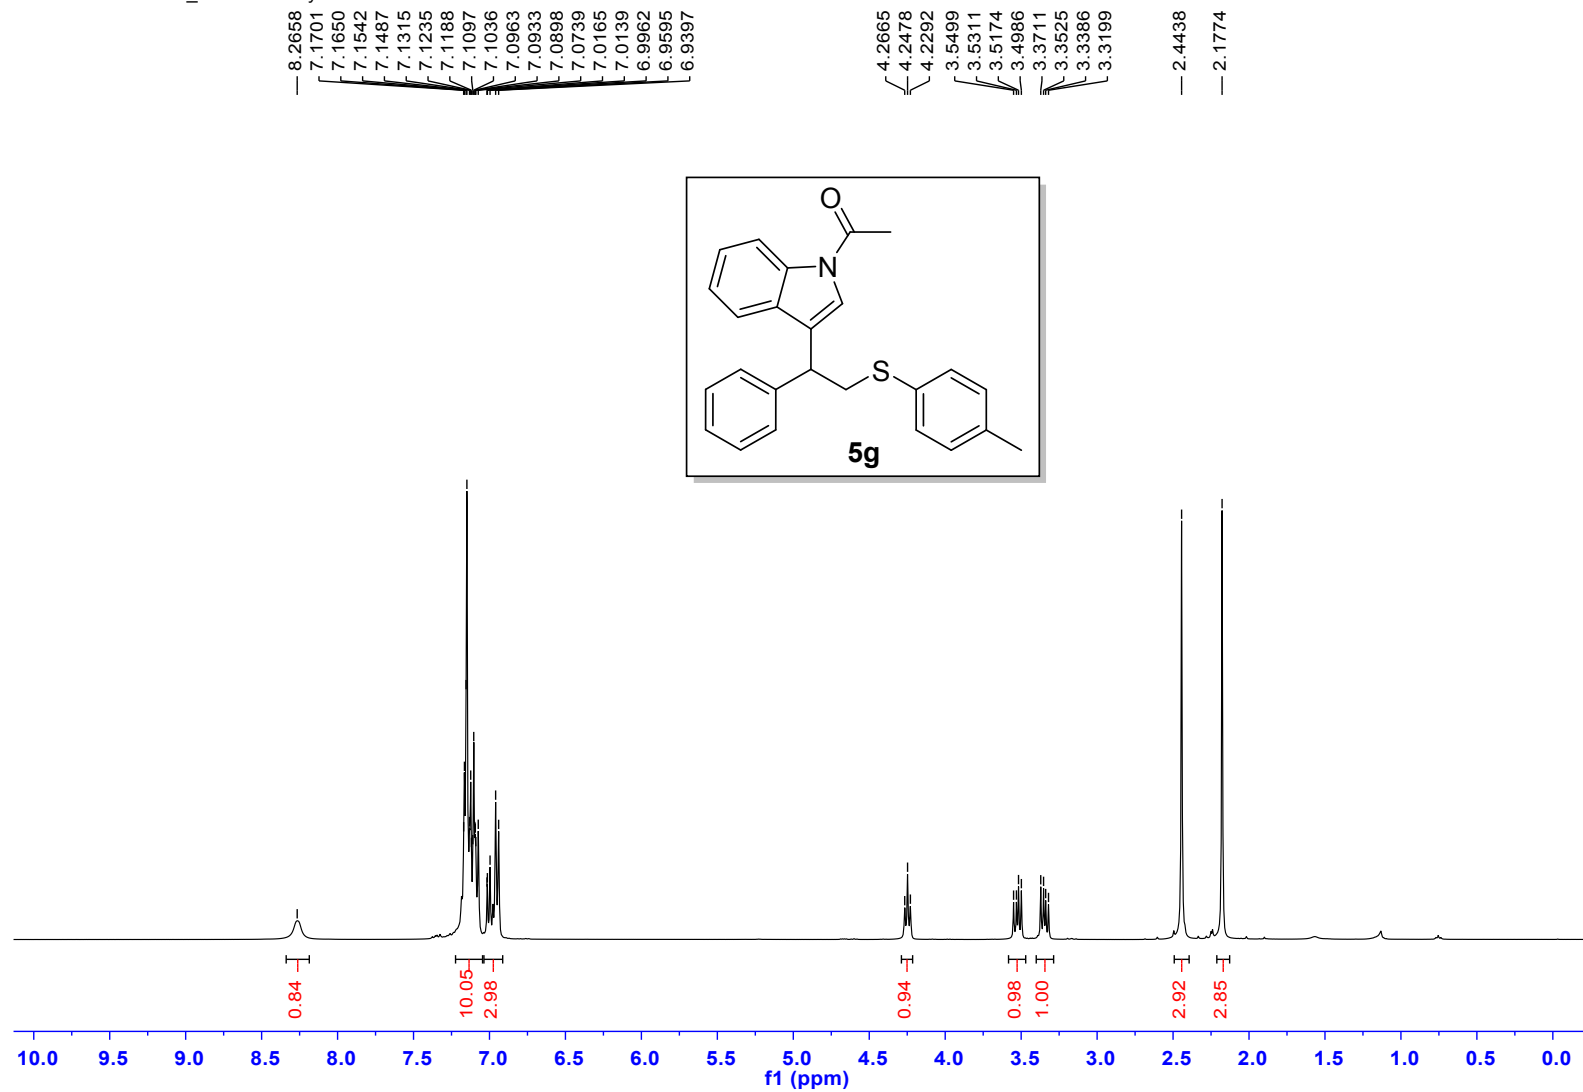

Jun21-2021-OSSO\_cj.7.fid — WYN-X210621-3-C

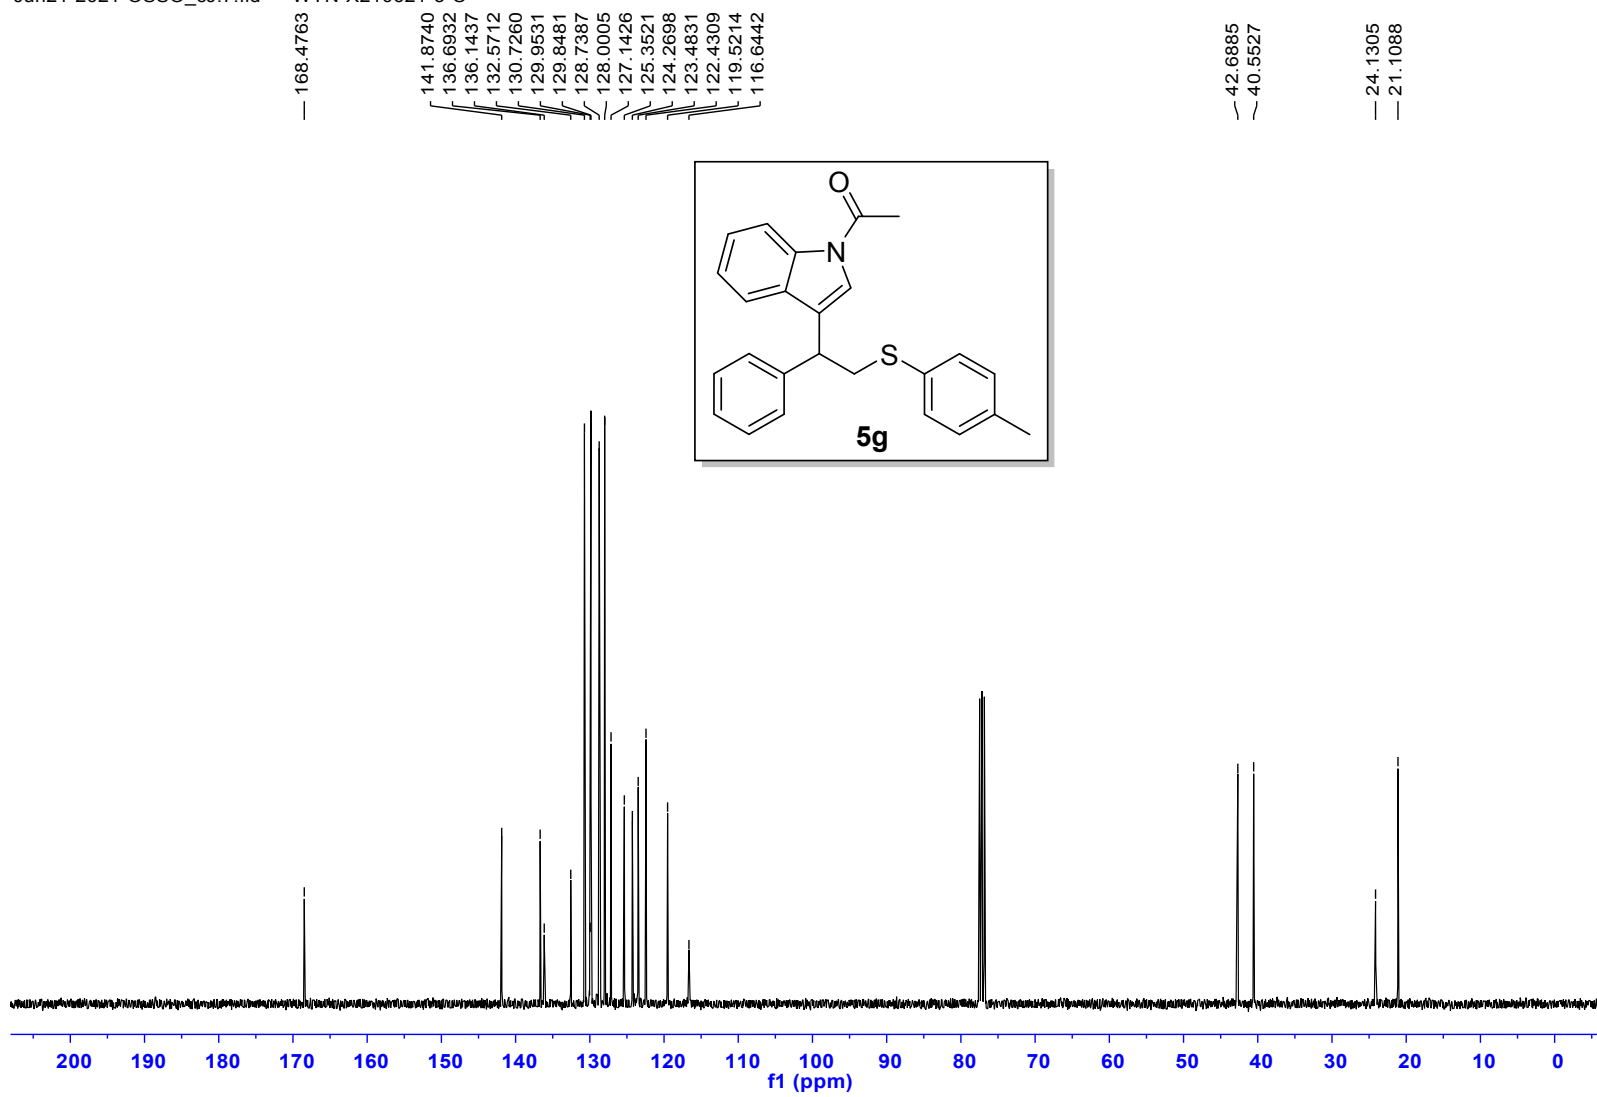

Nov27-2020-OSSO\_cj.8.fid — WYN-X201127-2

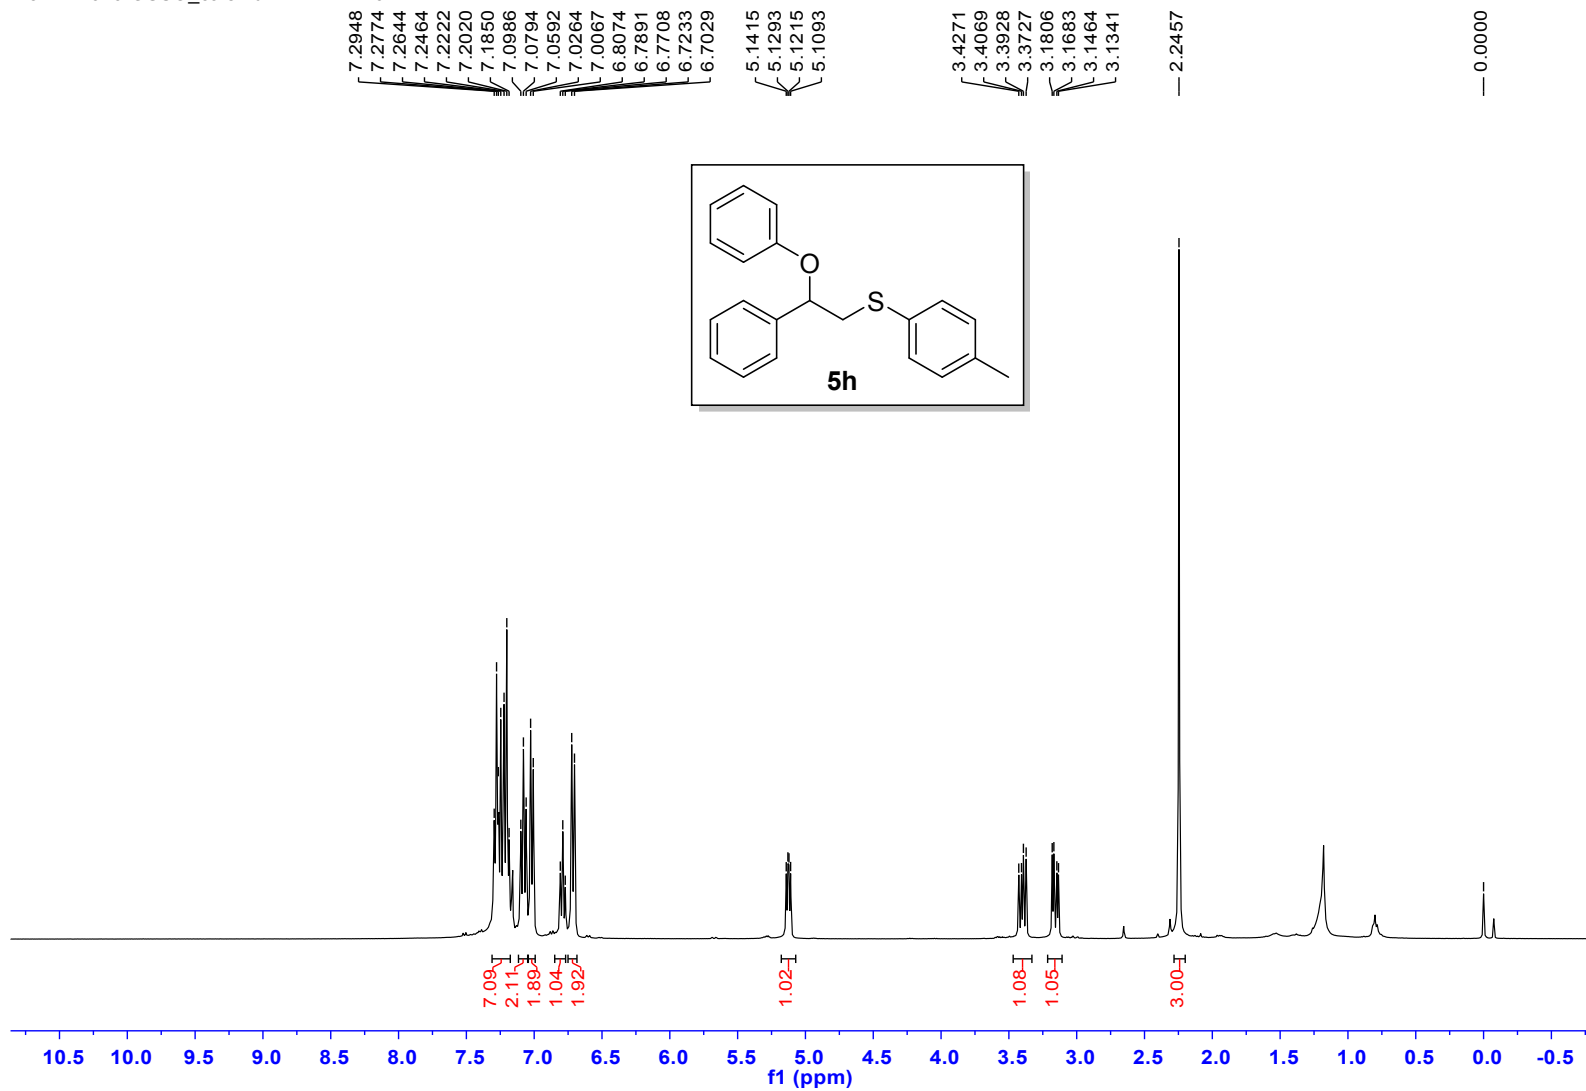



Nov30-2020-OSSO\_cj.12.fid — WYN-X201130-4

— 157.8945

140.3191  
136.5979  
132.3736  
130.7410  
129.7826  
129.3212  
128.7000  
128.1073  
126.2735  
121.0639  
116.0865

— 79.2323

— 42.8034

— 21.0905

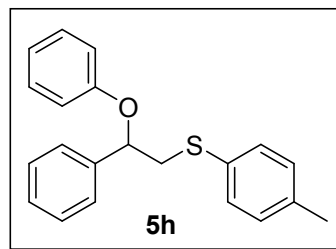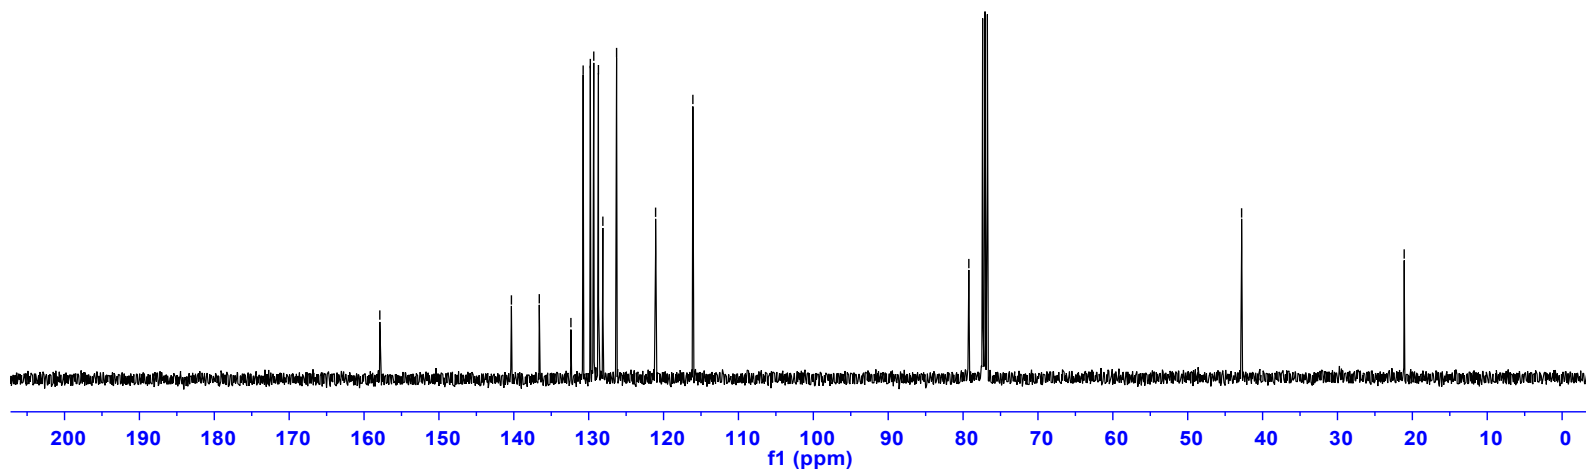

Nov23-2020-OSSO\_CJ.6.fid — WYN-X201123-3

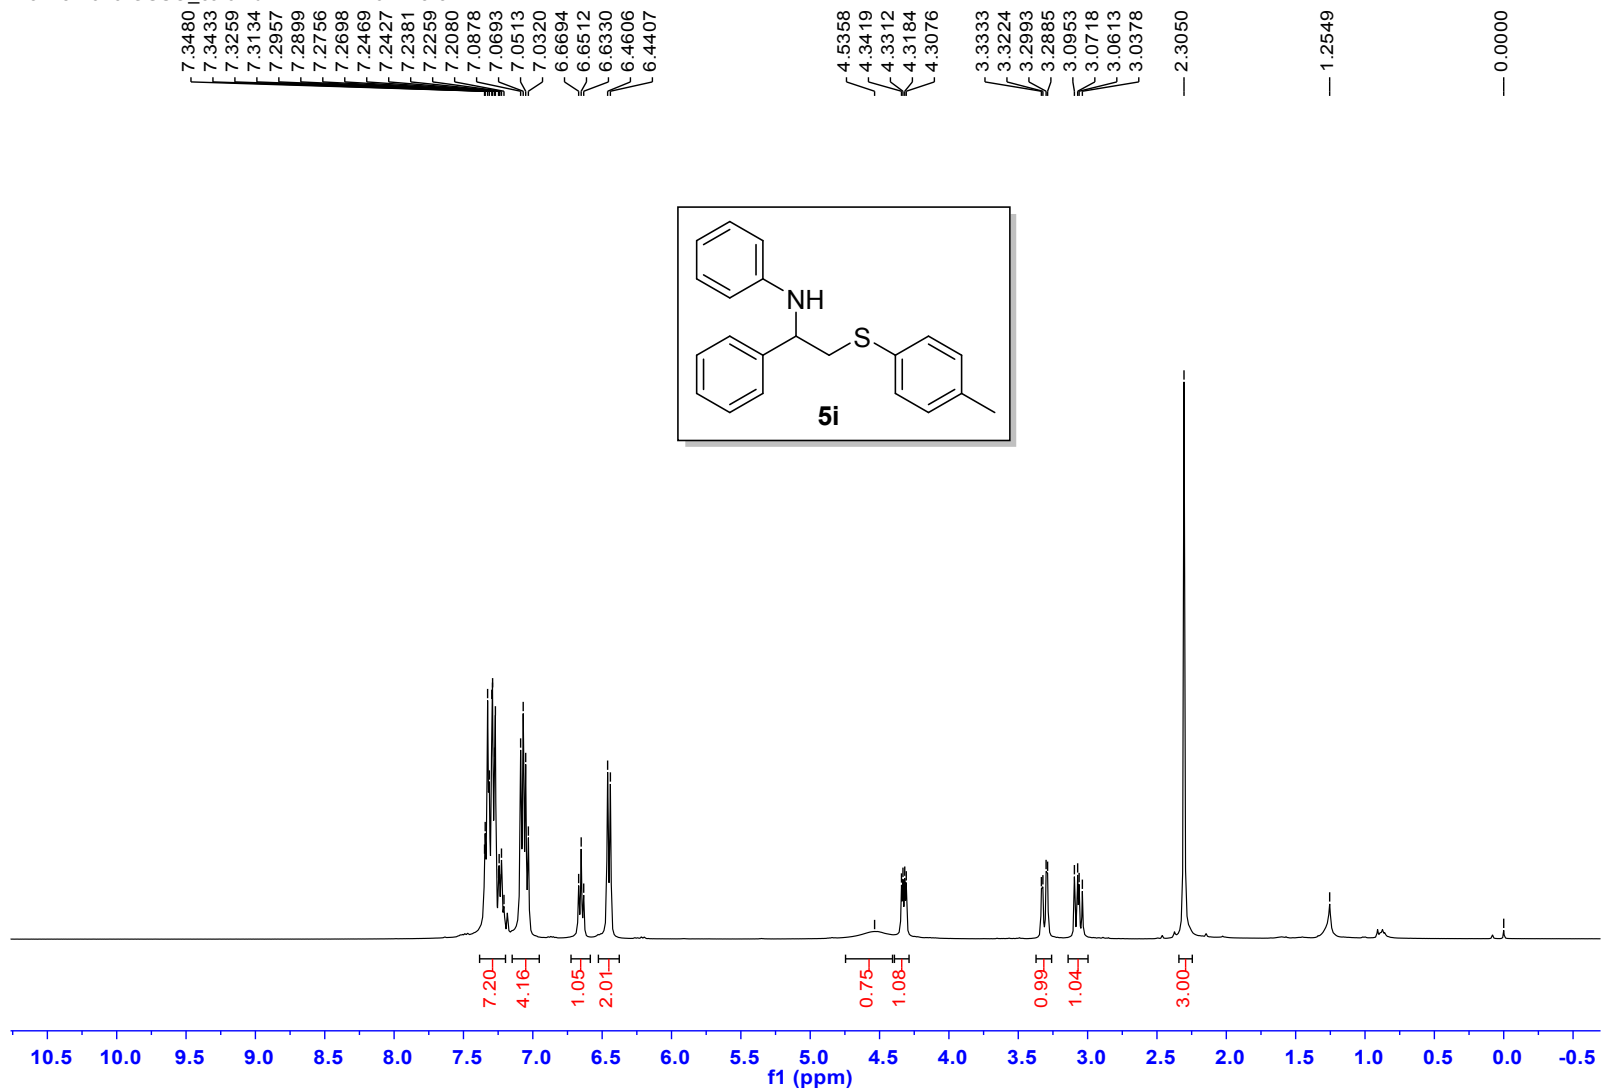

Nov23-2020-OSSO\_cj.39.fid — WYN-X201123-3

147.3476  
142.6144  
137.2746  
131.5199  
131.1380  
130.0072  
129.0994  
128.8881  
127.5776  
126.4269  
— 117.8695  
— 113.8697

— 57.3072

— 43.4672

— 21.1745

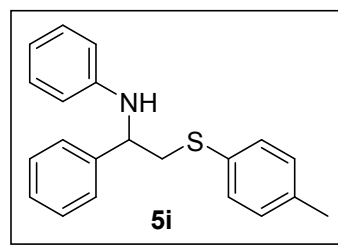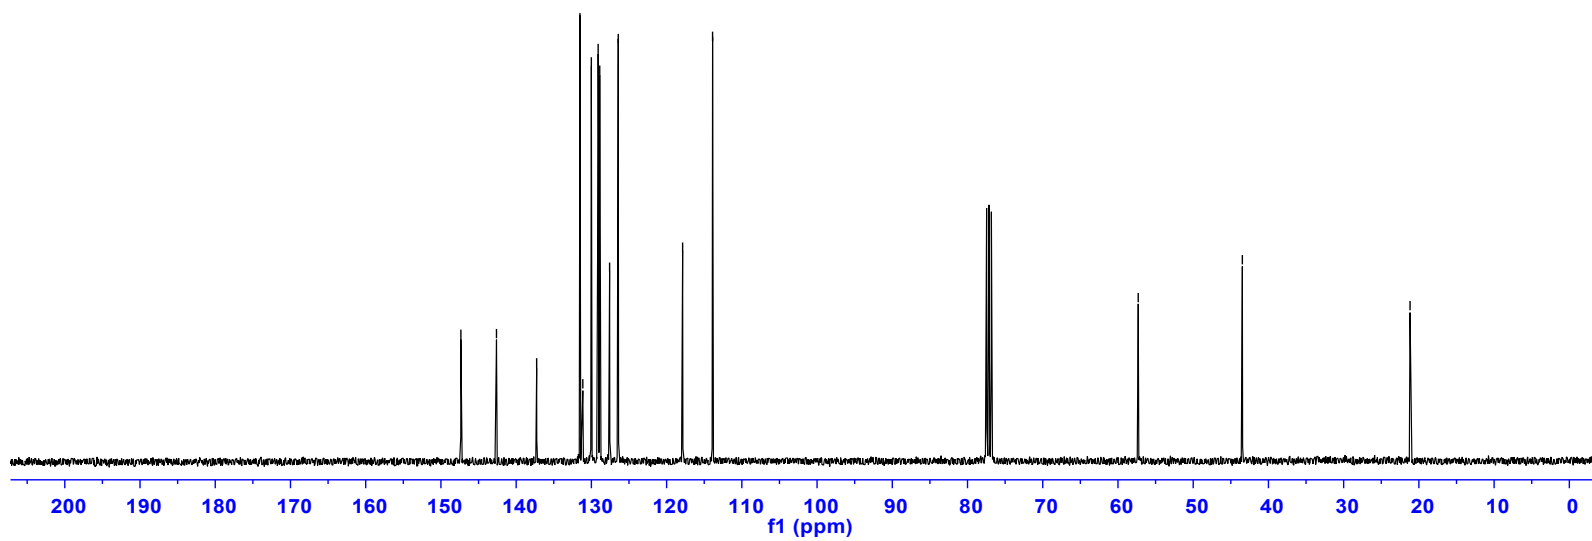

Dec01-2020-OSSO\_CJ.18.fid — WYN-X201201-5

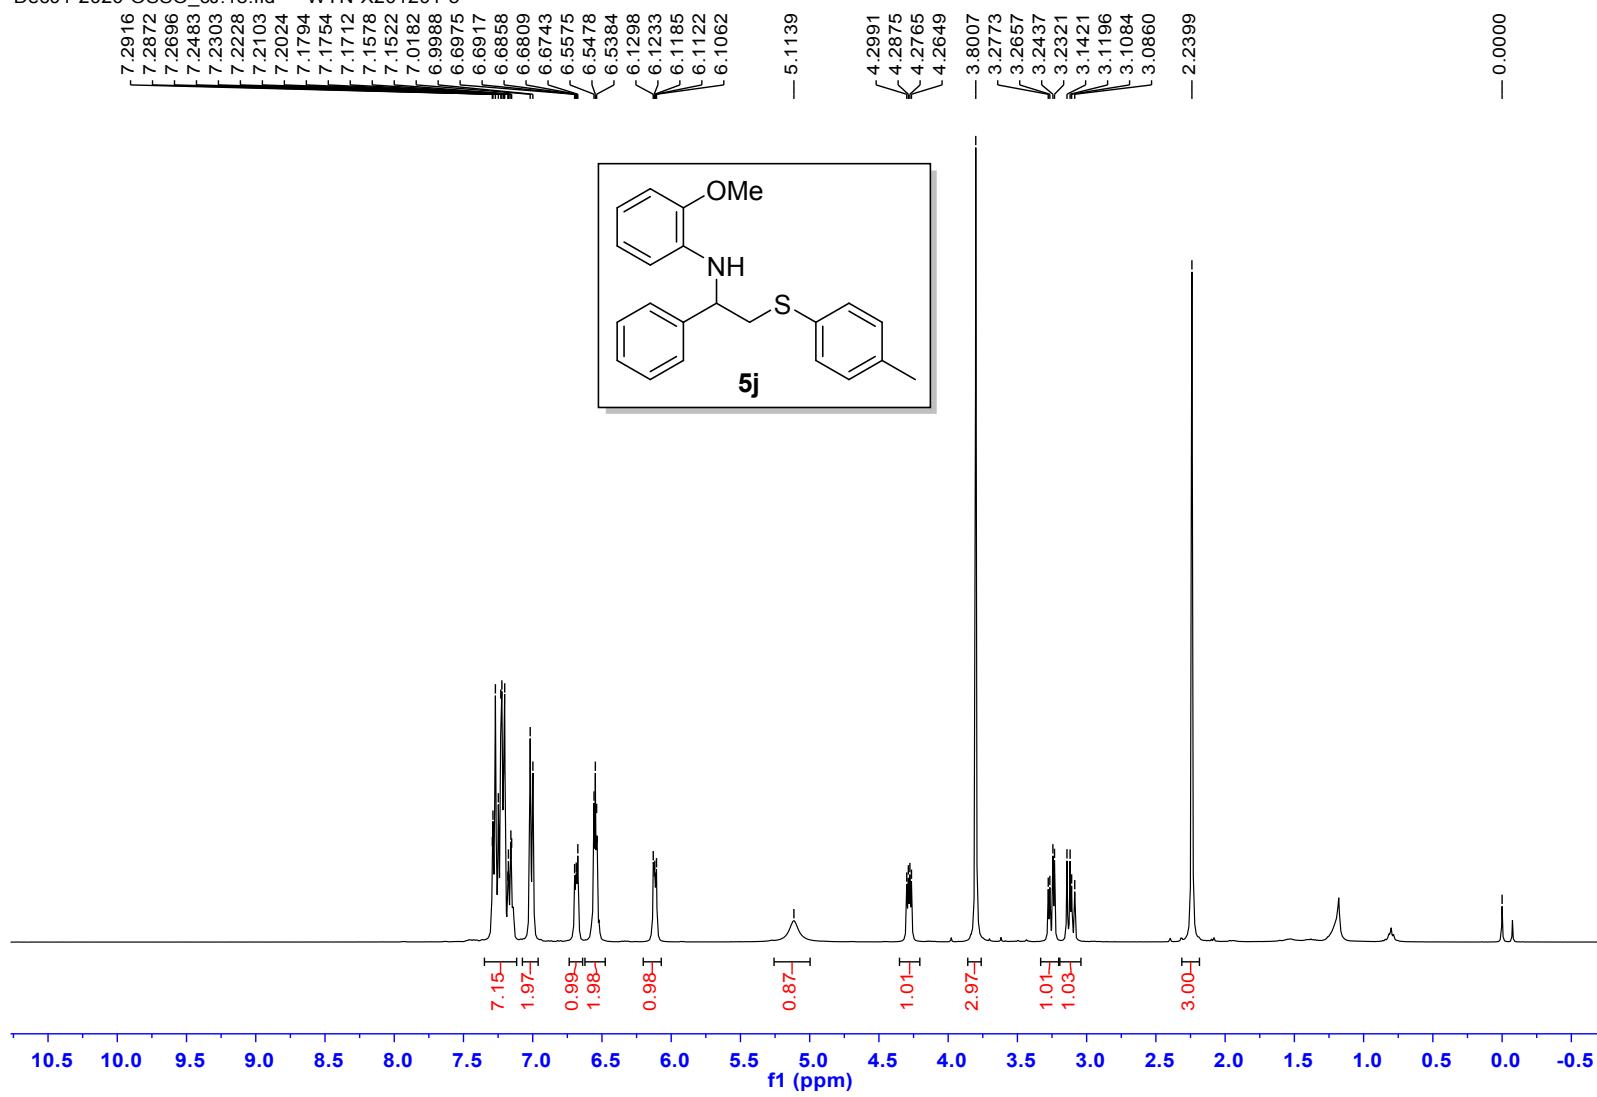

Dec04-2020-OSSO\_cj.14.fid — WYN-X201201-5-C

147.1260  
142.6709  
137.1183  
136.9390  
131.5689  
131.2574  
129.8620  
128.7830  
127.4774  
126.4633  
121.0149  
116.9020  
111.3584  
109.3865

57.2700  
55.5710

43.3442

21.1209

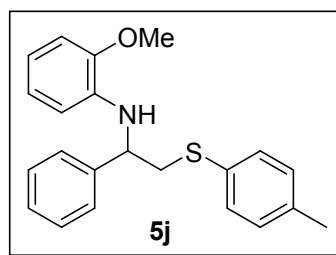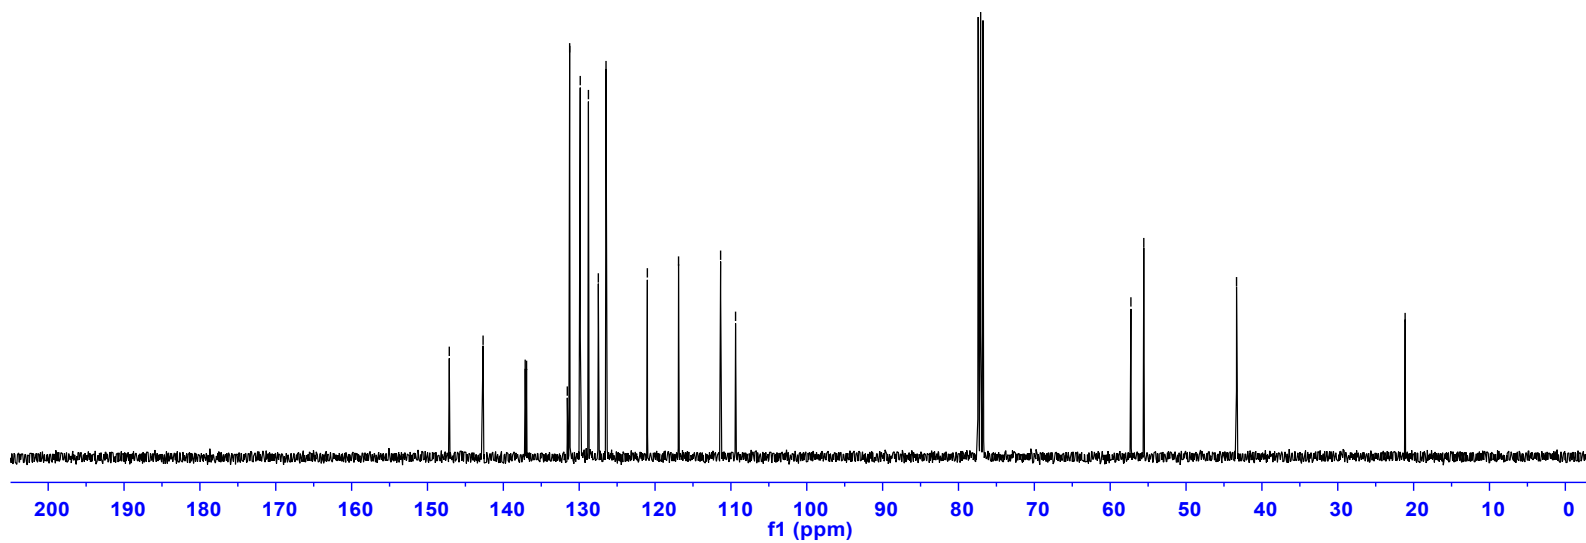

Dec03-2020-OSSO\_cJ.29.fid — wyn-x201203-2

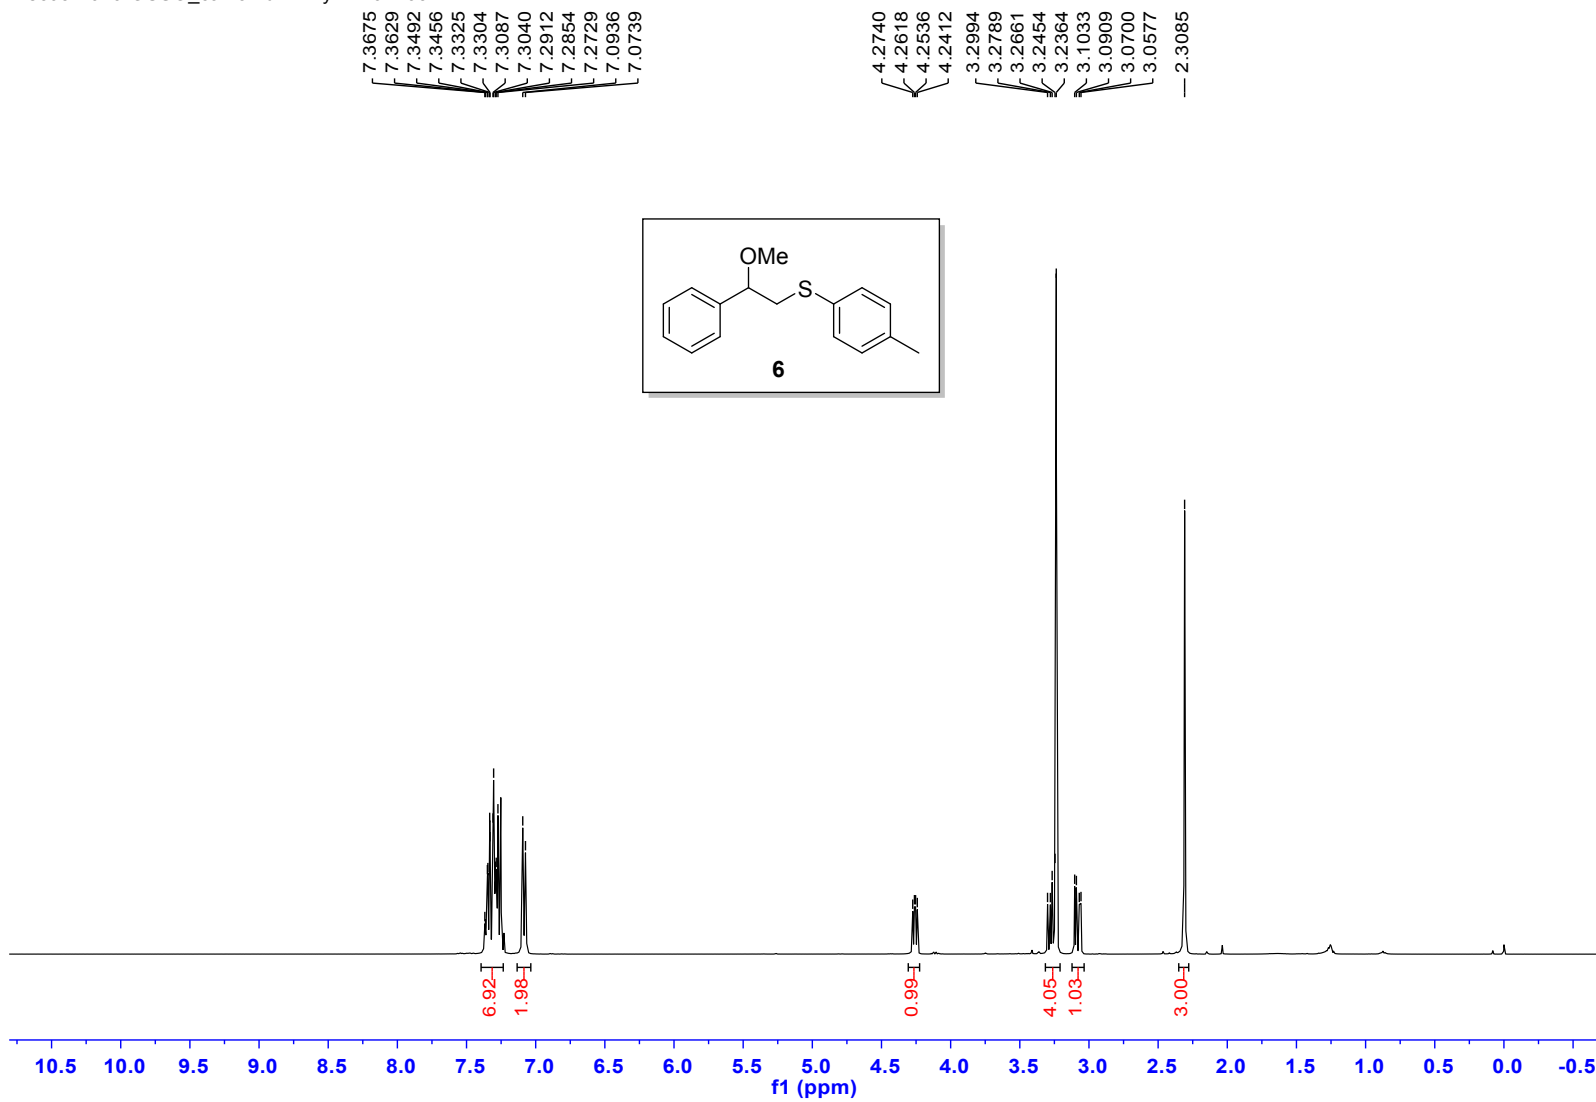

140.6119  
136.2434  
132.7262  
130.2083  
129.7274  
128.5719  
128.1389  
126.7890

— 82.4807

— 57.0695

— 42.2683

— 21.0681

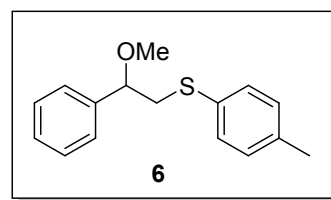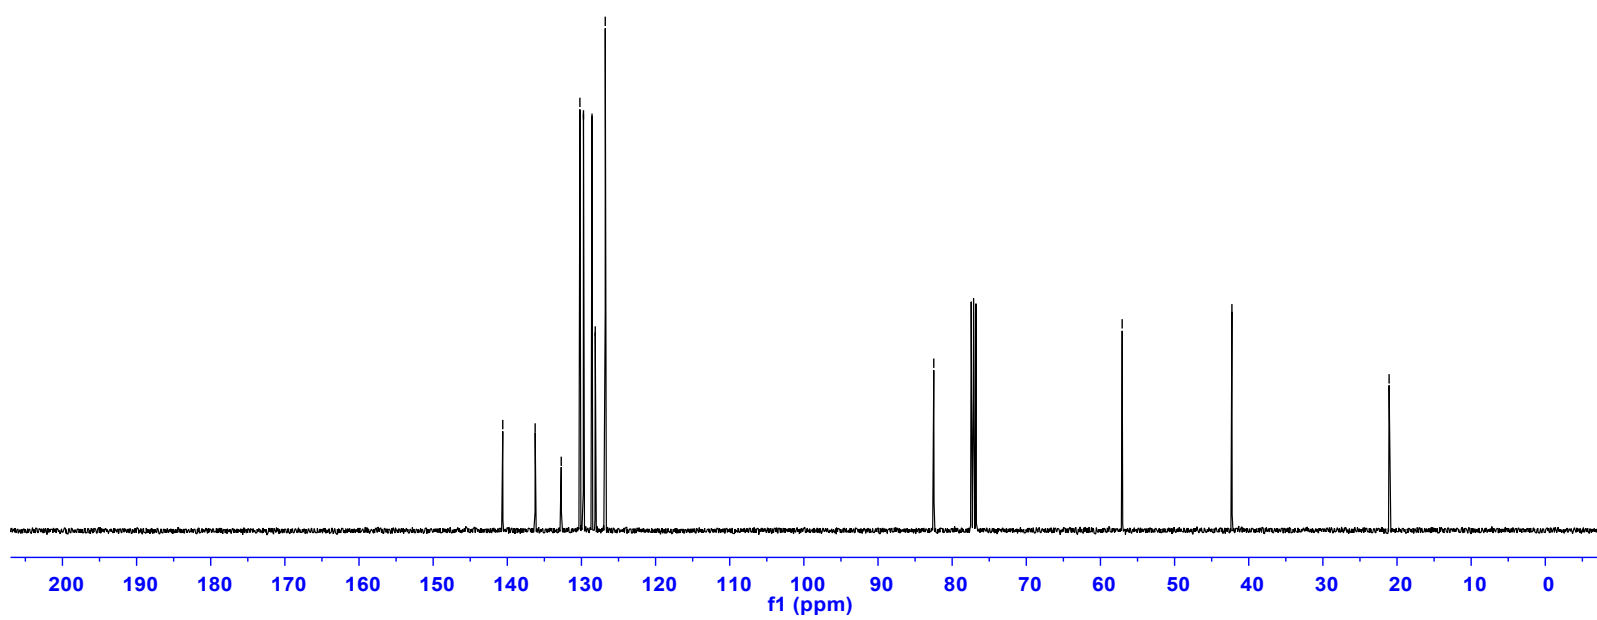

Mar08-2021-OSSO\_cj.5.fid — wyn-x210308-2-H

7.3087  
7.3034  
7.2876  
7.2873  
7.2826  
7.2694  
7.2689  
7.2579  
7.2536  
7.2533  
7.2387  
7.2322  
7.2275  
7.2120  
7.2119  
7.2119  
7.1738  
7.1537  
7.0814  
7.0609  
7.0441  
7.0290  
7.0090

4.1893  
4.1771  
4.1639  
4.1516  
3.4649  
3.4527  
3.4311  
3.4189  
3.3190  
3.2935  
3.2851  
3.2597  
2.3163  
2.3108

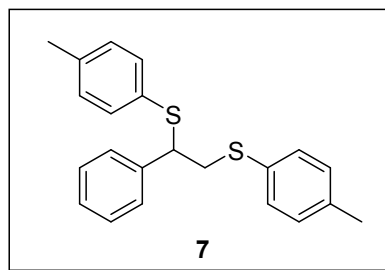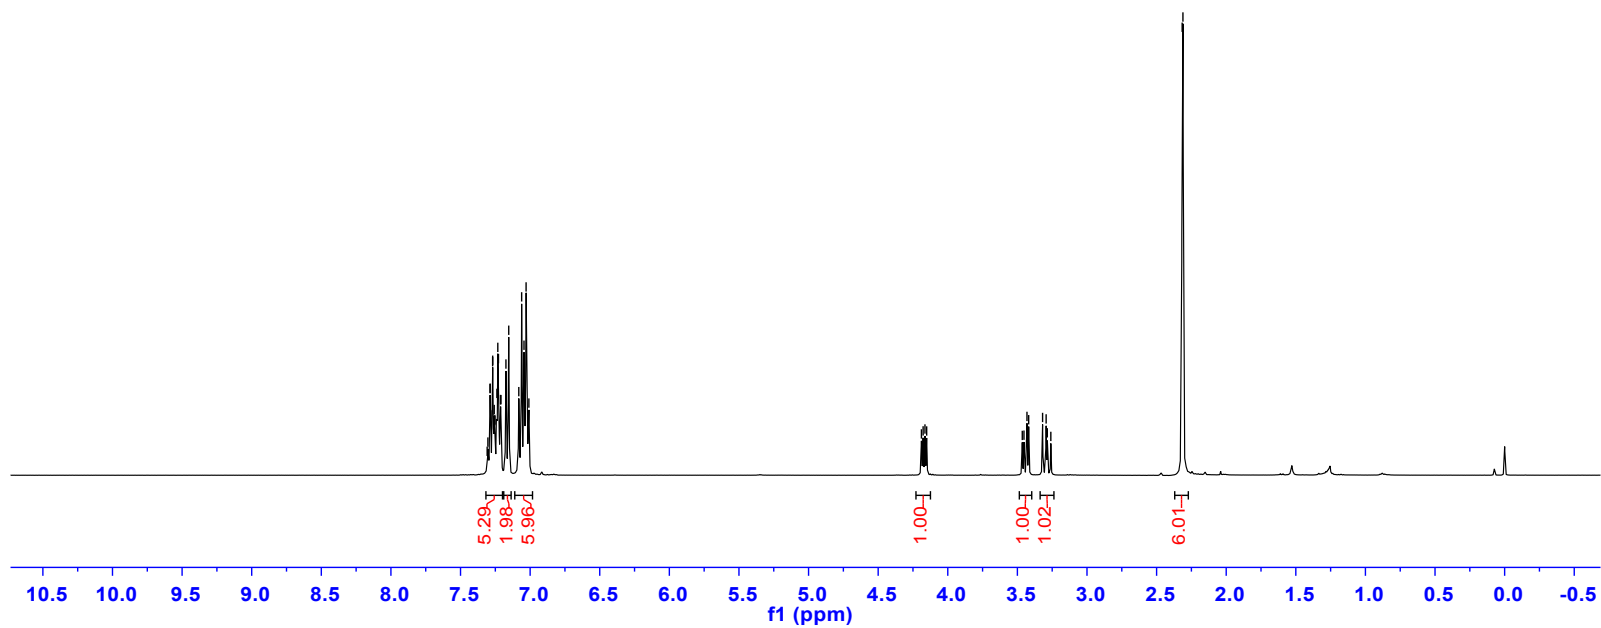



Mar08-2021-OSSO\_cJ.32.fid — wyn-x210308-2-C

139.8318  
137.8382  
136.4961  
133.4161  
131.7598  
130.5692  
130.3749  
129.6944  
129.6654  
128.4695  
128.1232  
127.6566

— 52.5858

— 40.0476

< 21.1831  
< 21.0702

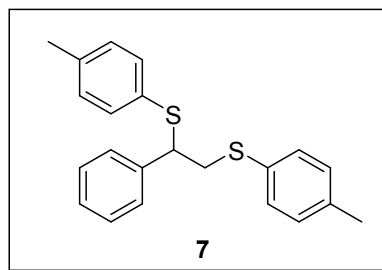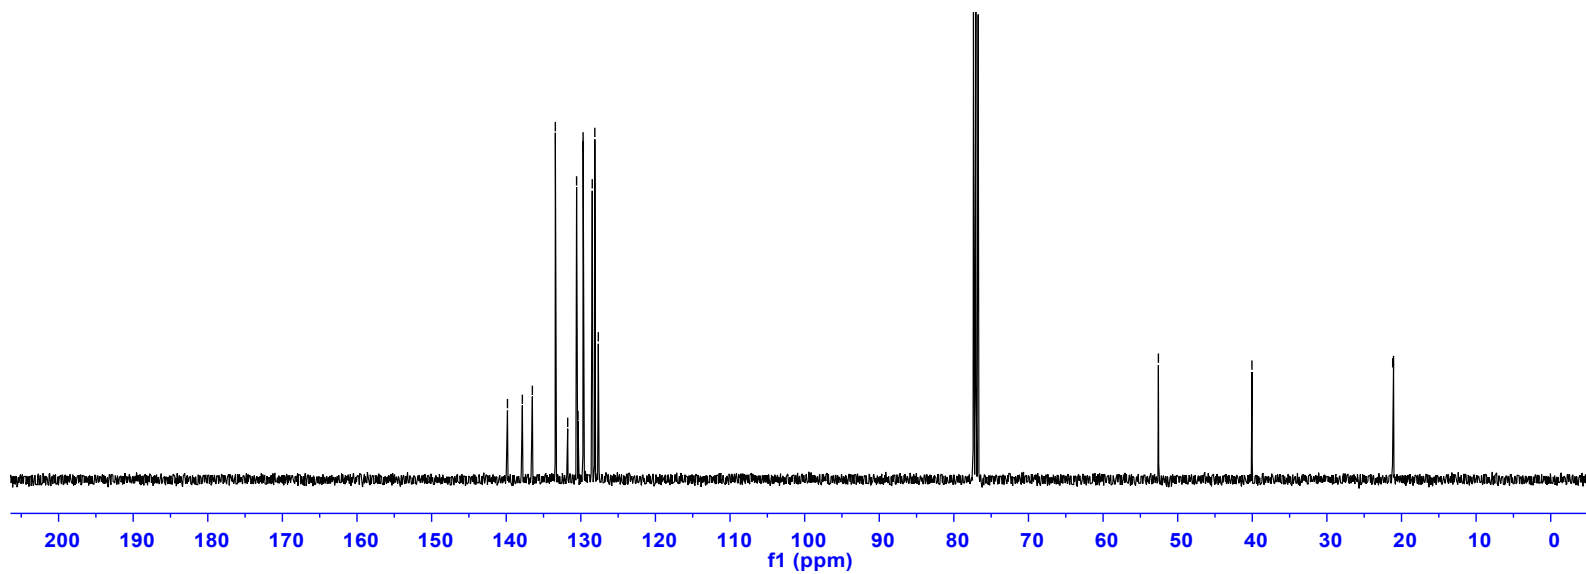

Dec24-2020-OSSO\_cj.4.fid — WYN-X201224-1

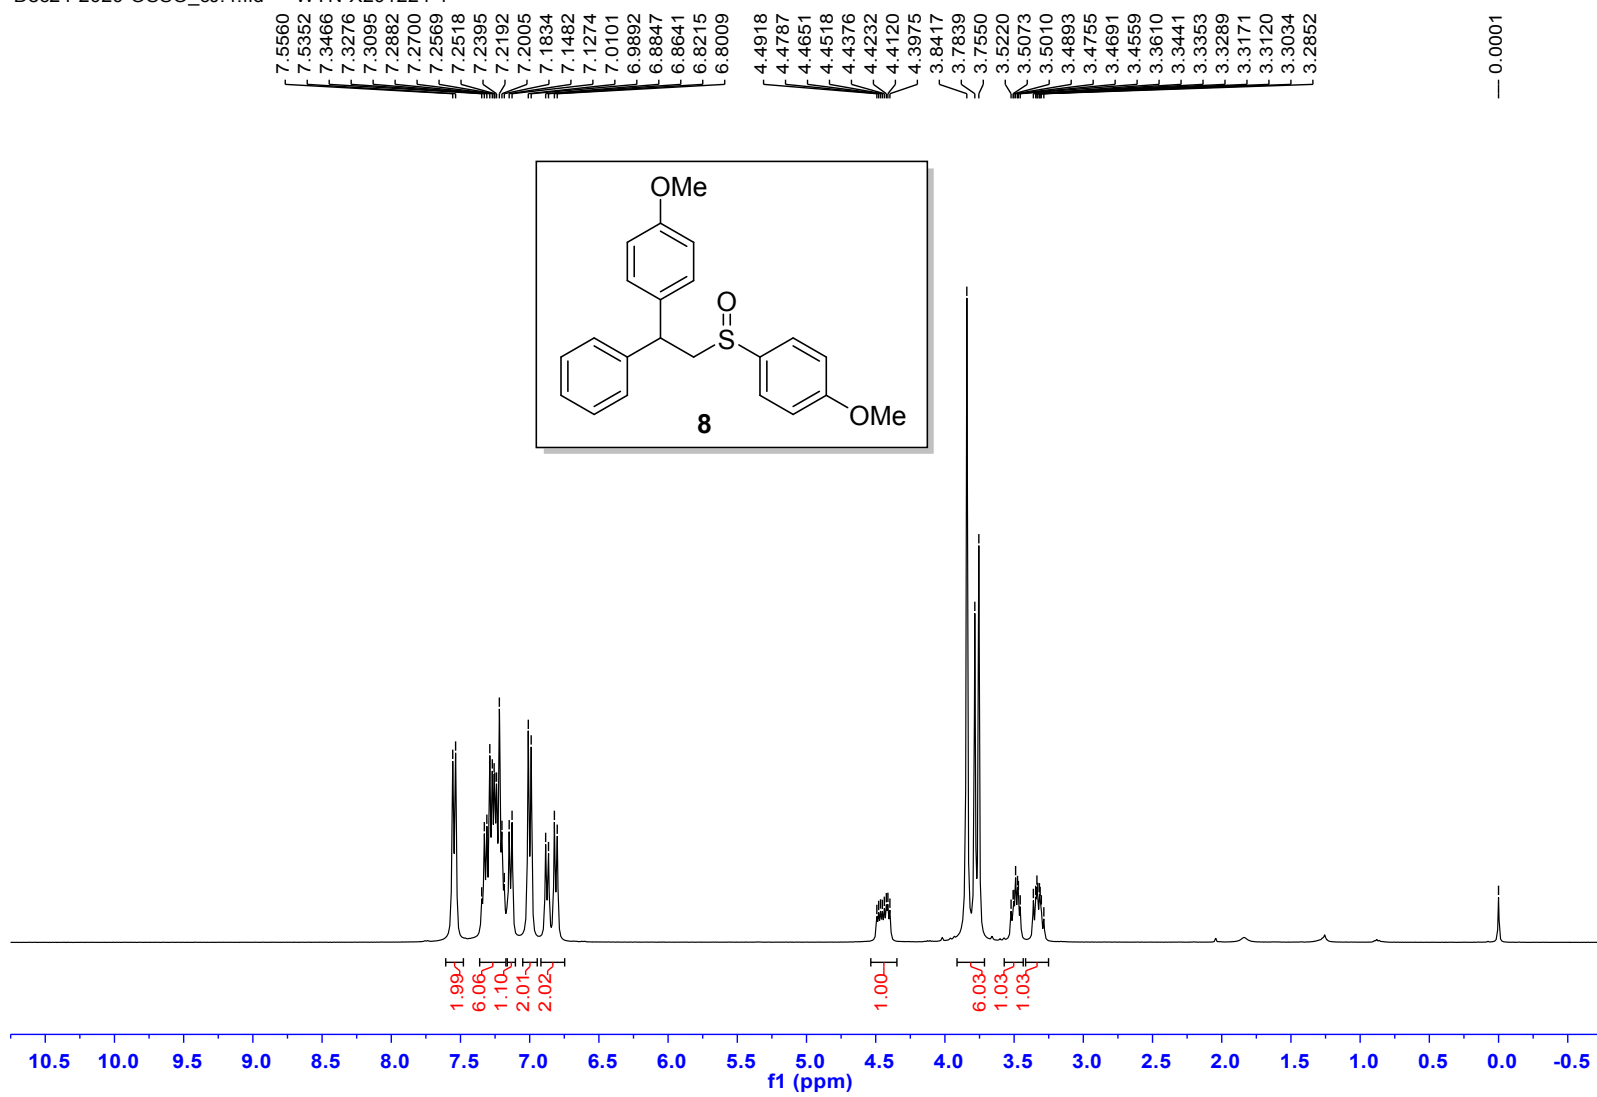

Dec25-2020-OSSO\_cj.15.fid — WYN-X201124-1-C

162.0974  
162.0757  
158.6181  
158.4138  
142.7450  
141.9329  
135.1986  
135.1002  
134.4404  
133.5374  
129.1976  
128.8704  
128.7319  
128.6991  
128.0284  
127.5974  
127.0566  
126.8128  
126.1328  
126.0784  
114.8434  
114.2527  
114.1034

64.9258  
64.7621  
55.5567  
55.2611  
44.7672  
44.7334

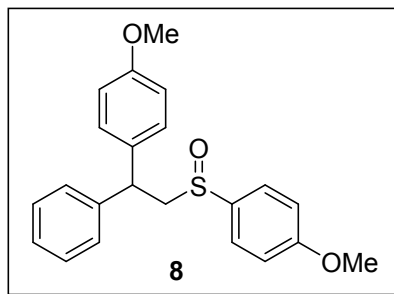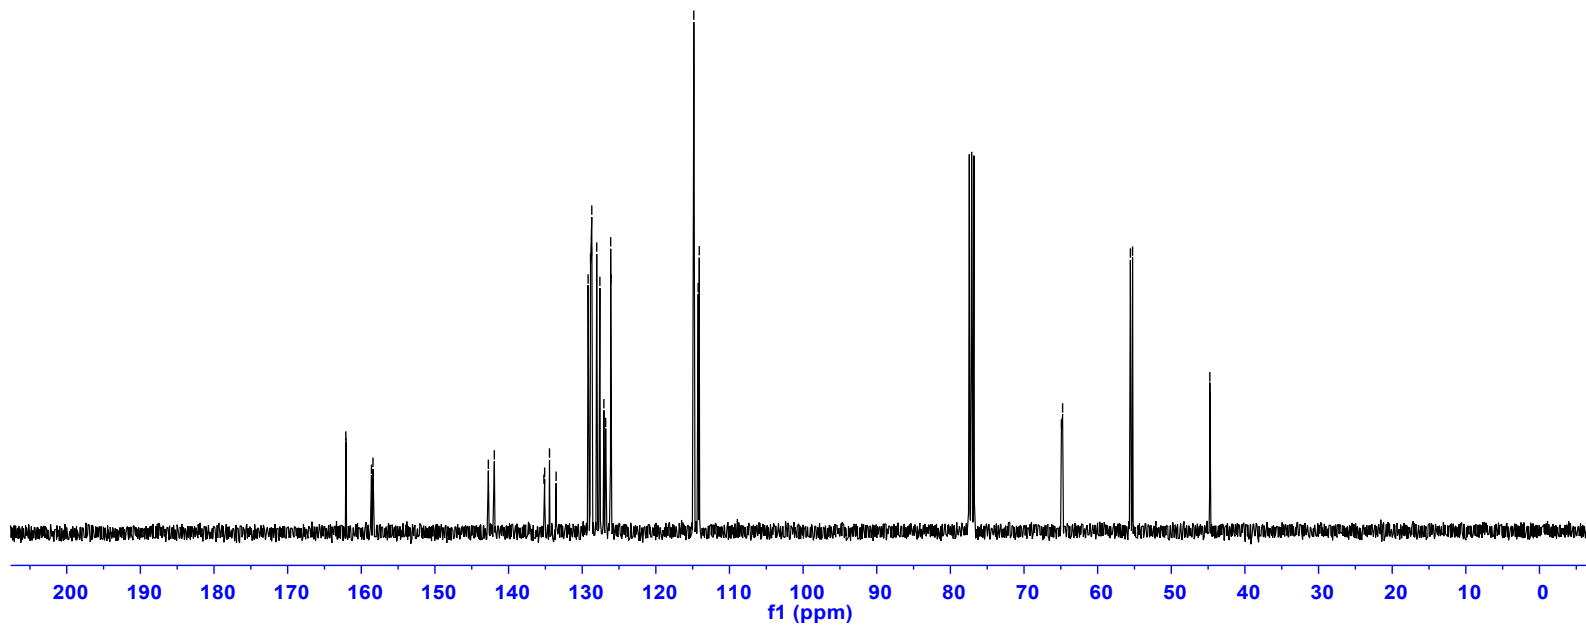

Dec24-2020-OSSO\_cj.5.fid — WYN-X201224-2

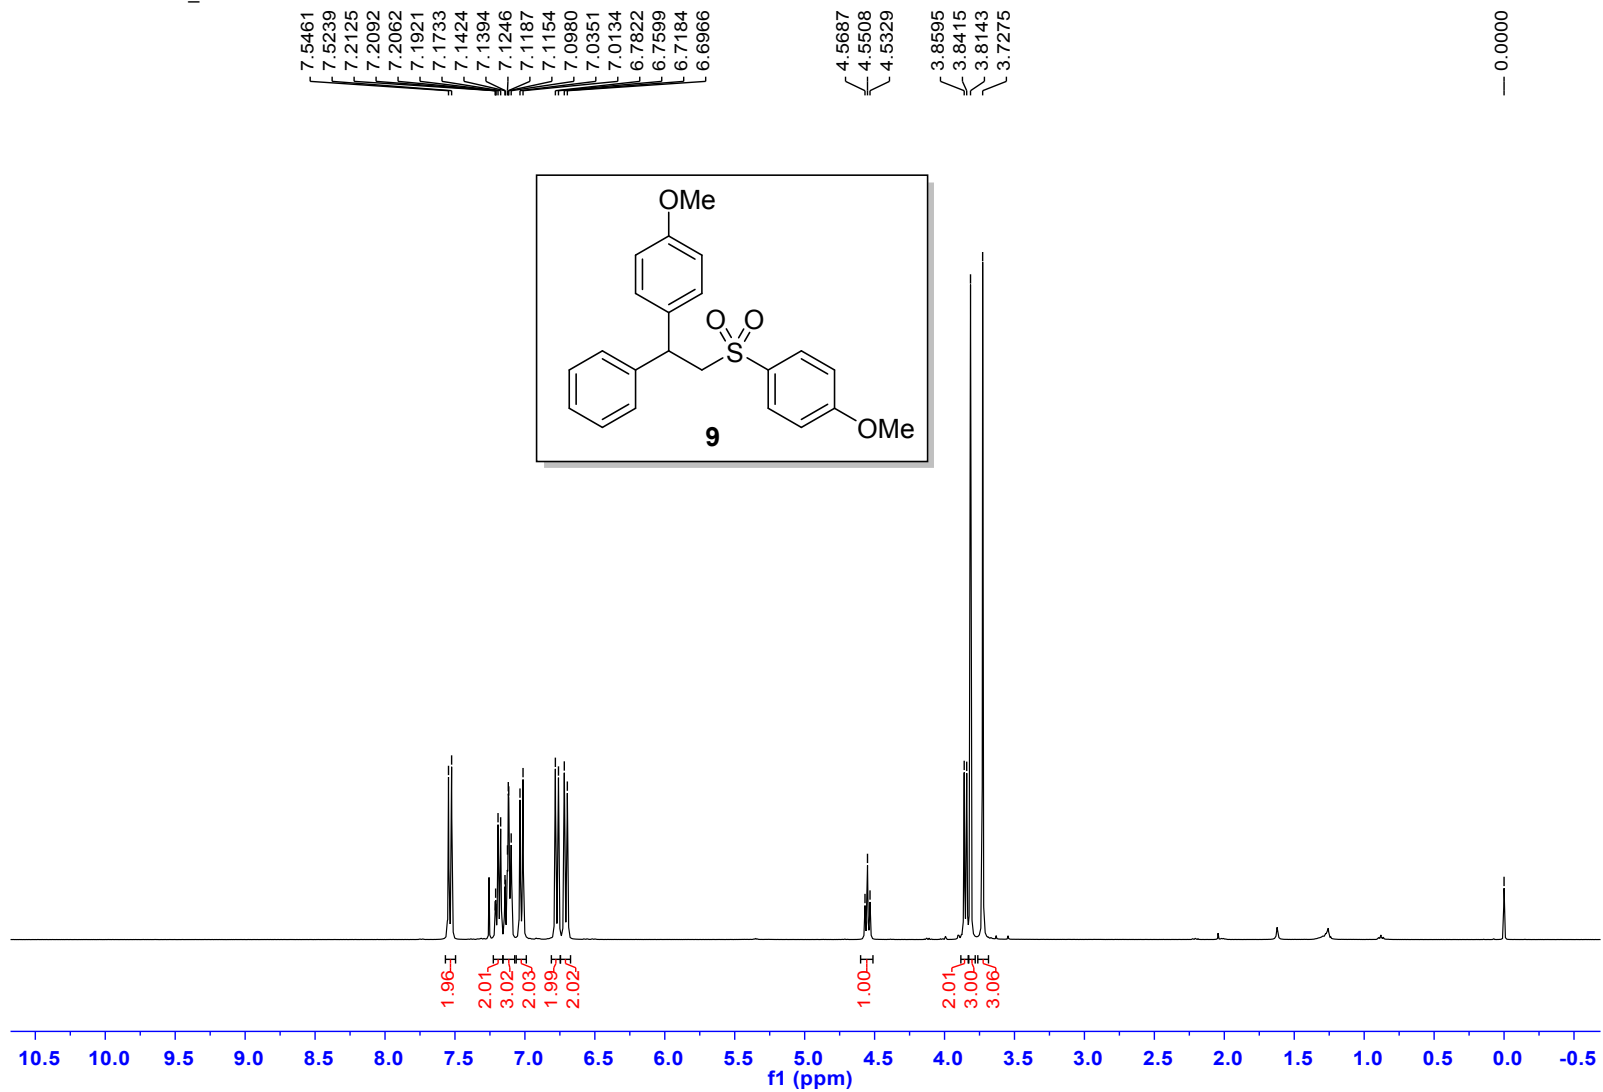

Dec25-2020-OSSO\_cj.2.fid — wyn-x201124-2

- 163.3105
- 158.3672
- 141.9045
- 133.4565
- 131.1571
- 130.1311
- 128.7132
- 128.6483
- 127.4665
- 126.7853
- 114.0633

- 61.8594
- 55.6187
- 55.2140
- 45.5468

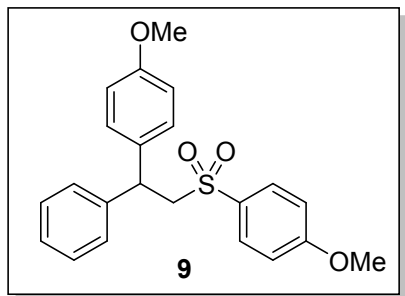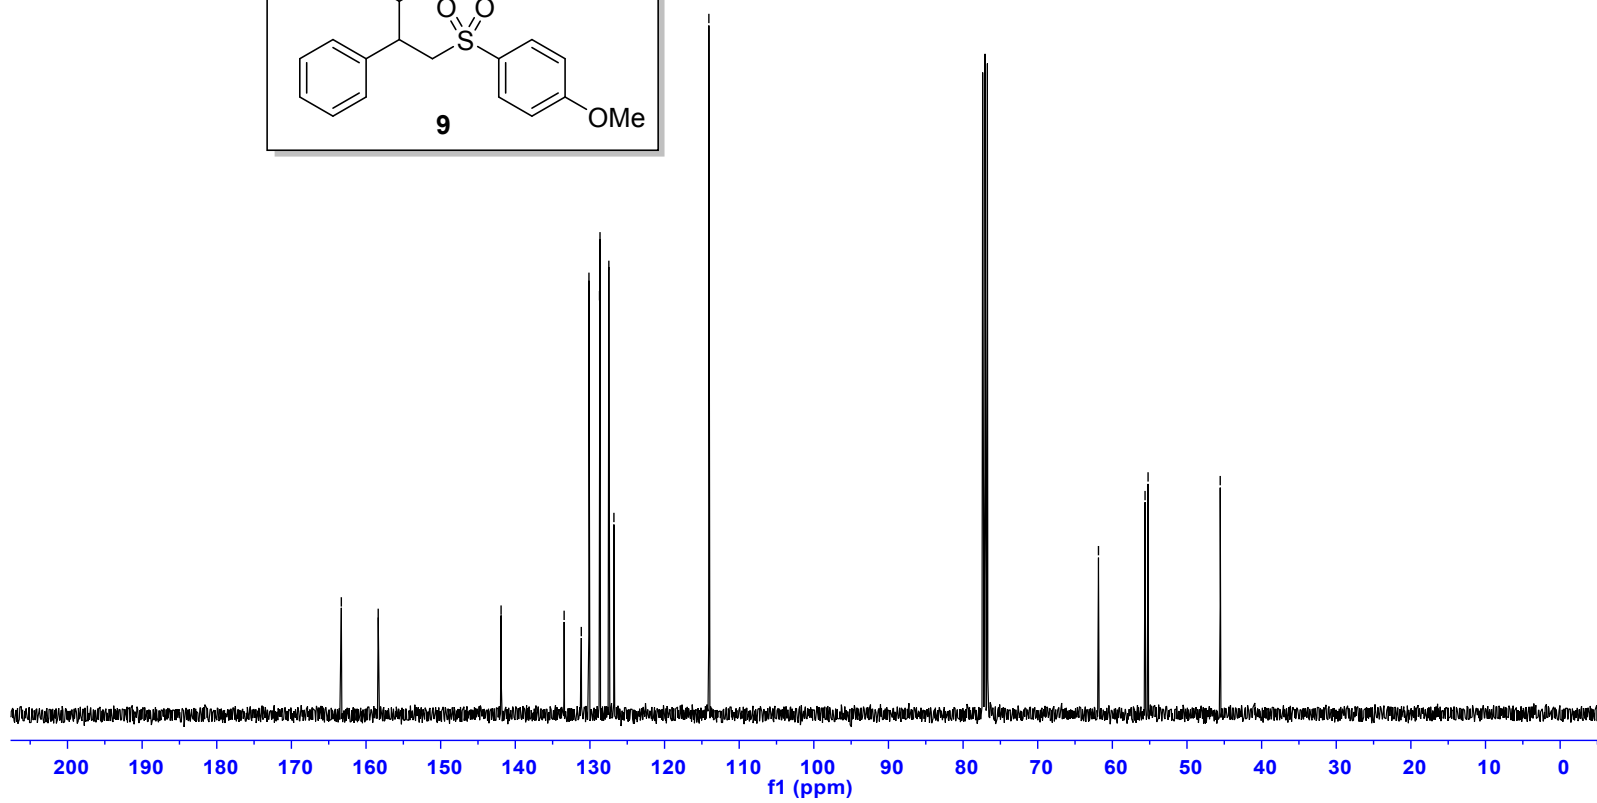

7.3827  
7.3622  
7.0984  
7.0785

2.3039

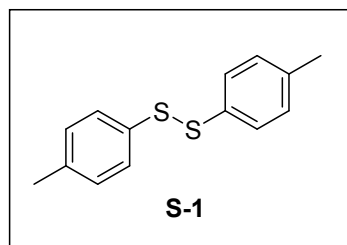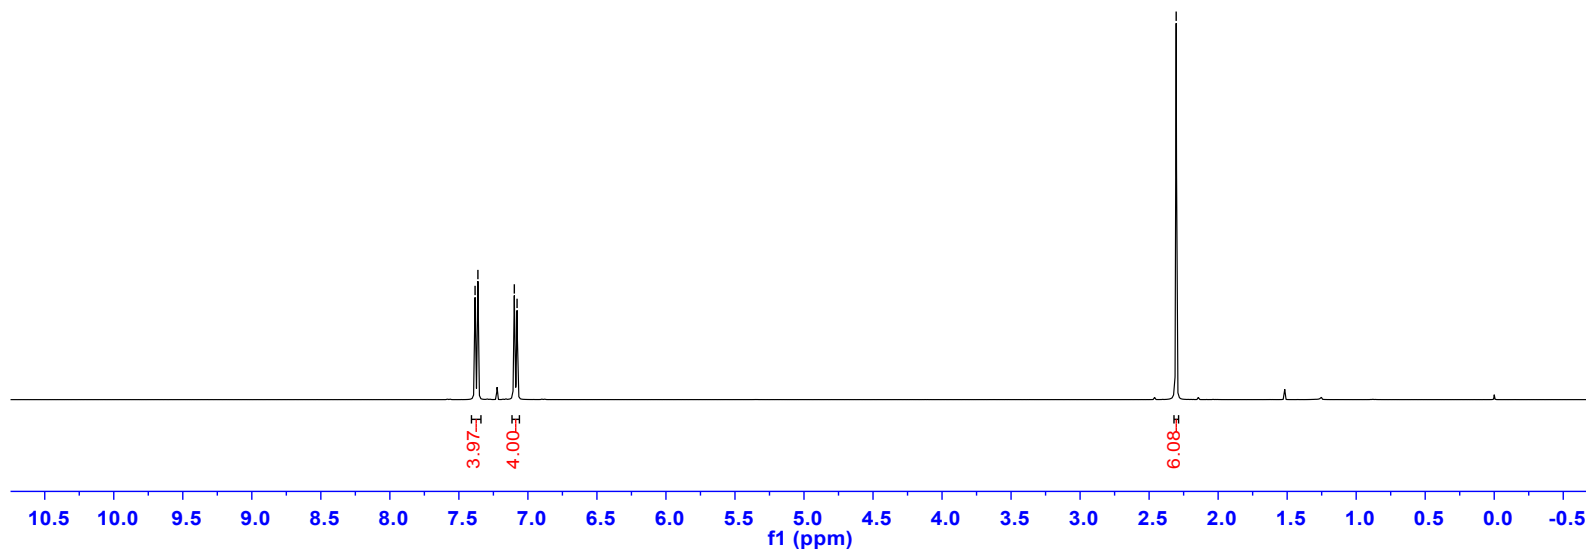

— 137.4583  
— 133.9299  
— 129.8177  
— 128.5605

— 21.0981

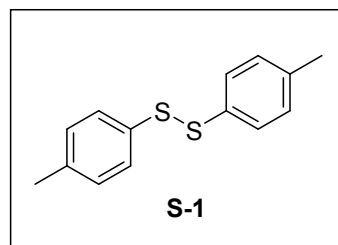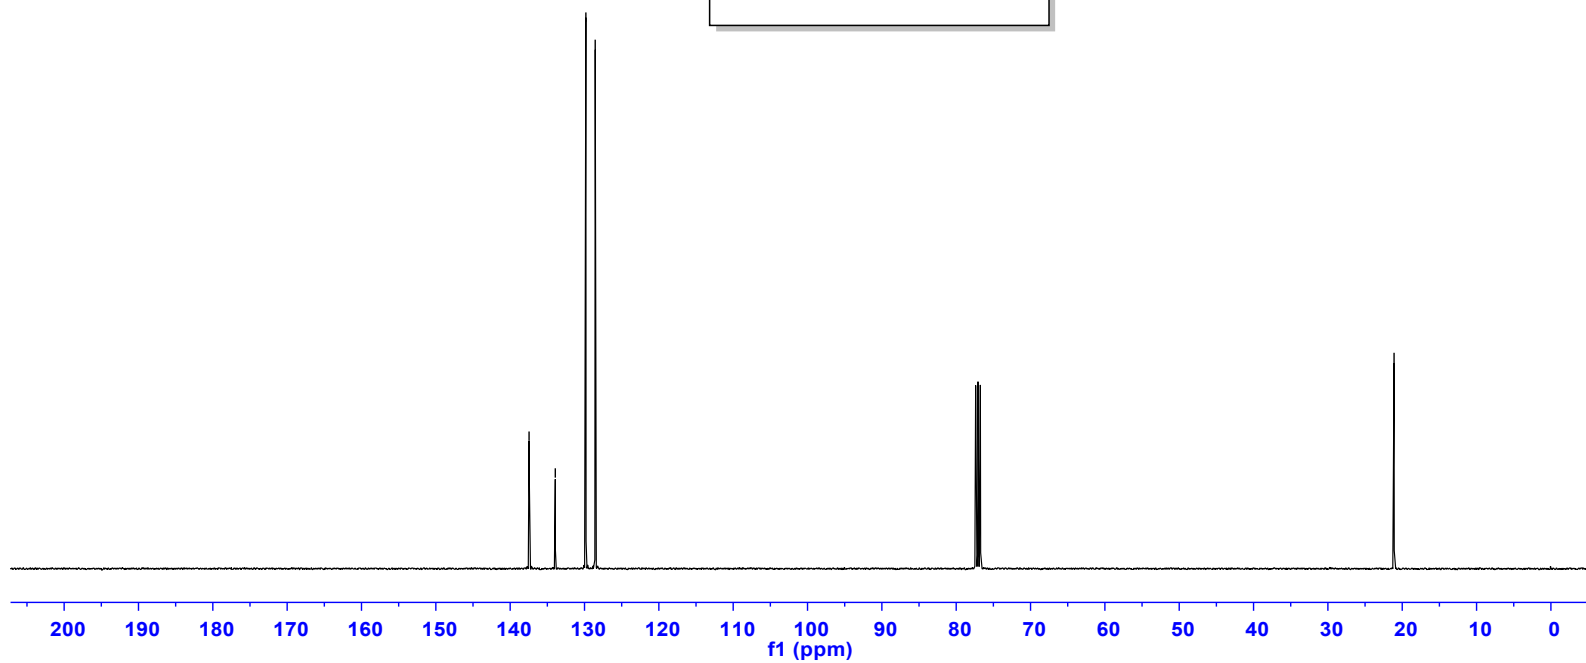

Mar08-2021-OSSO\_cJ.4.fid — wyn-x210308-1-H

7.3757  
7.3679  
7.3625  
7.3512  
7.3459  
7.3380  
7.1368  
7.1163  
7.0680  
7.0479  
6.8799  
6.8721  
6.8667  
6.8554  
6.8502  
6.8422

3.7967

2.2941

0.0000

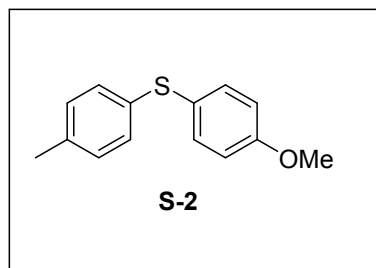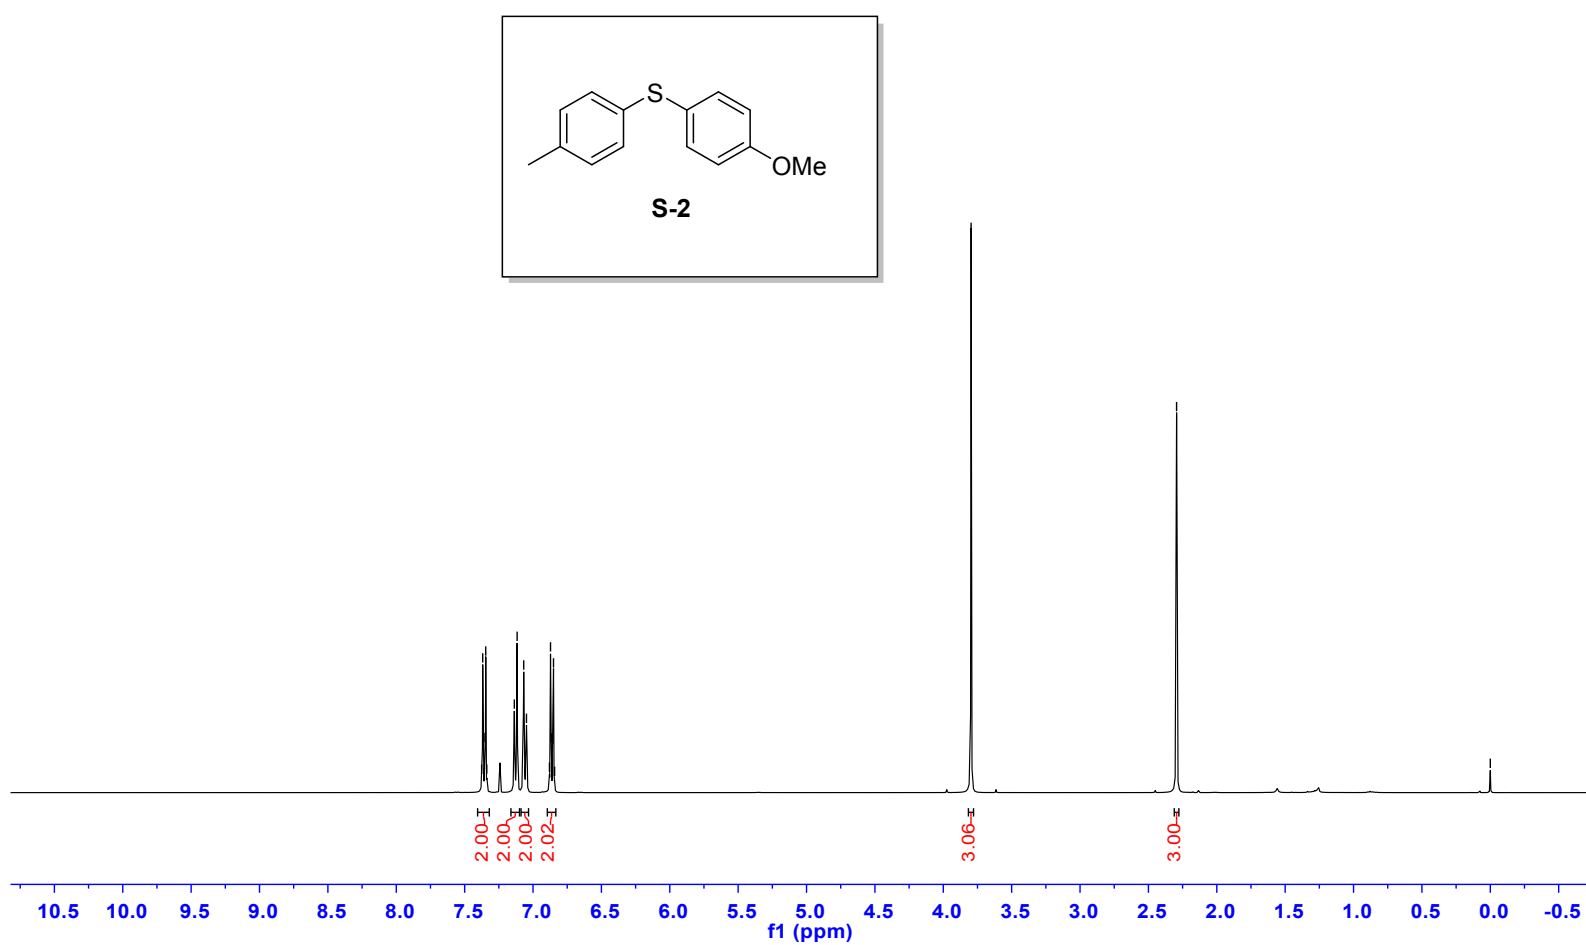



— 159.4575

136.1234  
134.3639  
129.7810  
129.3773  
125.6380

— 114.8720

— 55.3664

— 21.0104

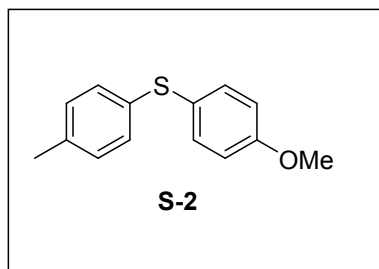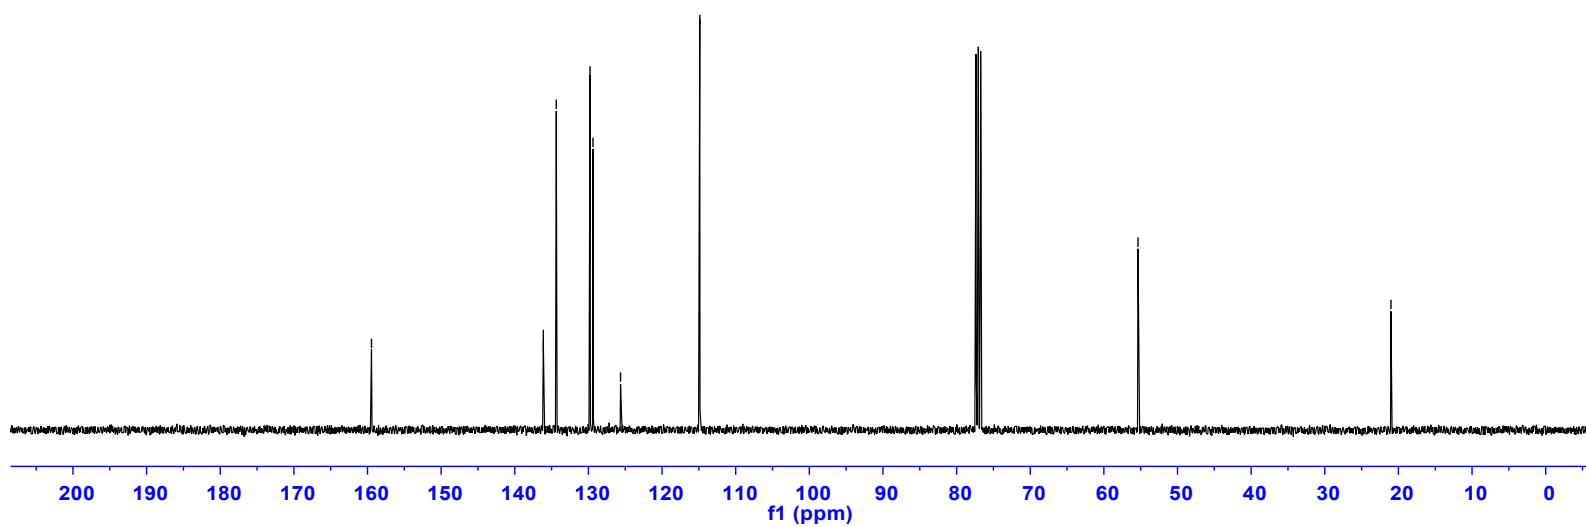

Jun10-2021-osso-cj.18.fid — WH-X210610-1

8.0645  
8.0440  
7.8135  
7.7923  
7.6182  
7.6090  
7.5706  
7.5511  
7.5486  
7.3711  
7.3525  
7.3330  
7.2774  
7.2586  
7.2404  
7.2250  
7.2048  
6.6925  
6.6848

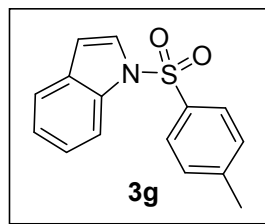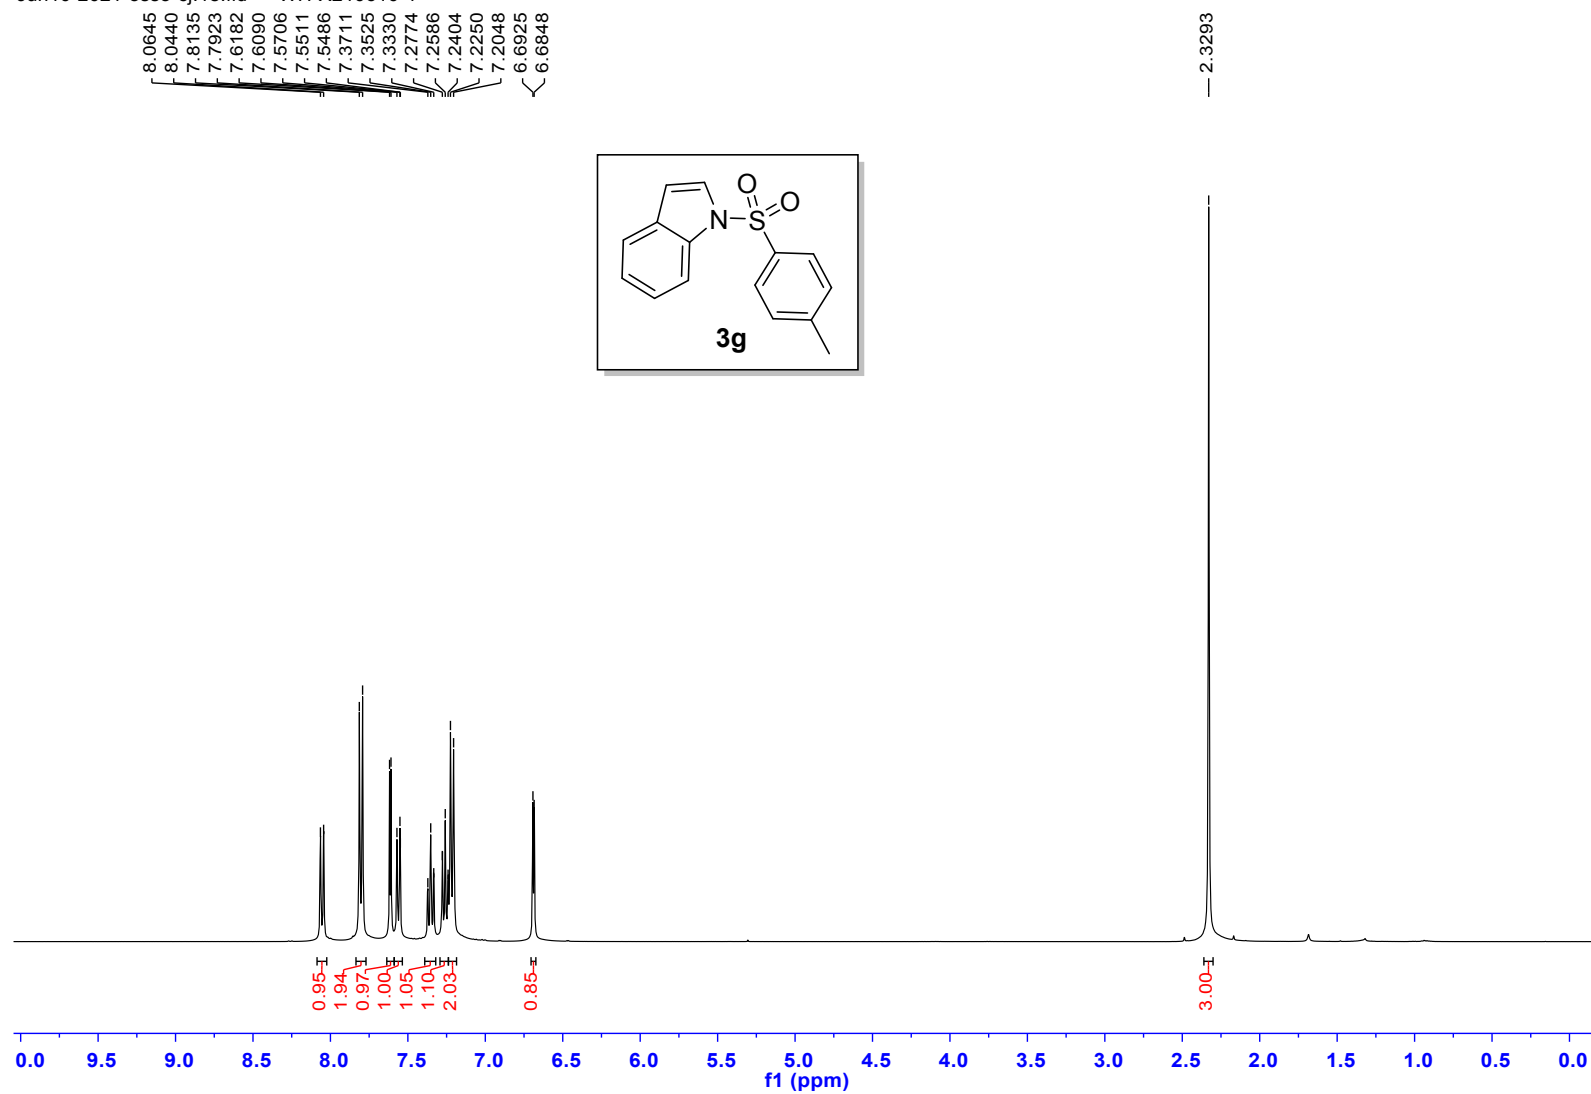

144.9603  
135.2965  
134.8477  
130.7808  
129.8793  
126.8080  
126.3626  
124.5751  
123.3079  
121.4178  
— 113.5530  
— 109.0732

77.4400  
77.1224  
76.8045

— 21.5390

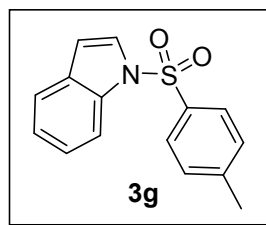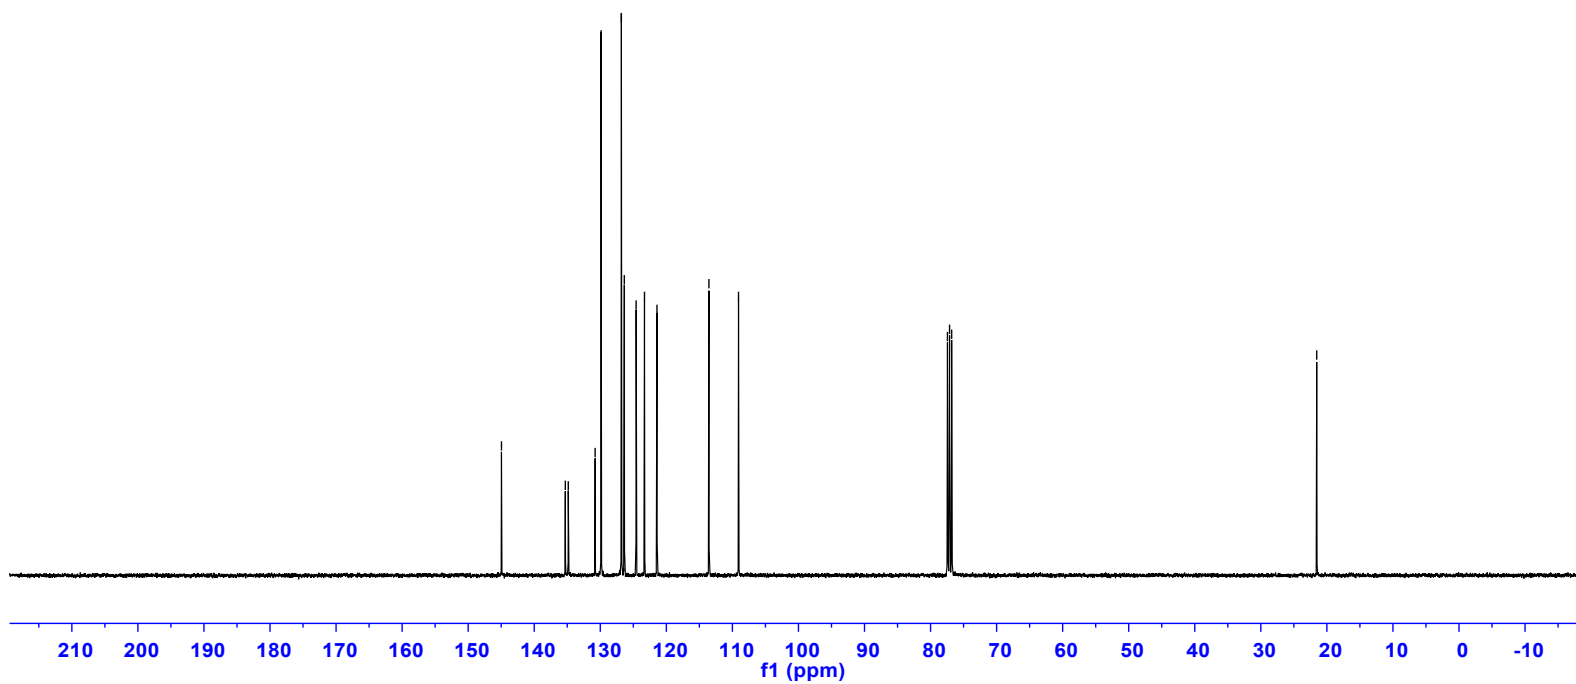

Jun07-2021-OSSO\_cj.55.fid — WH-X210607-2

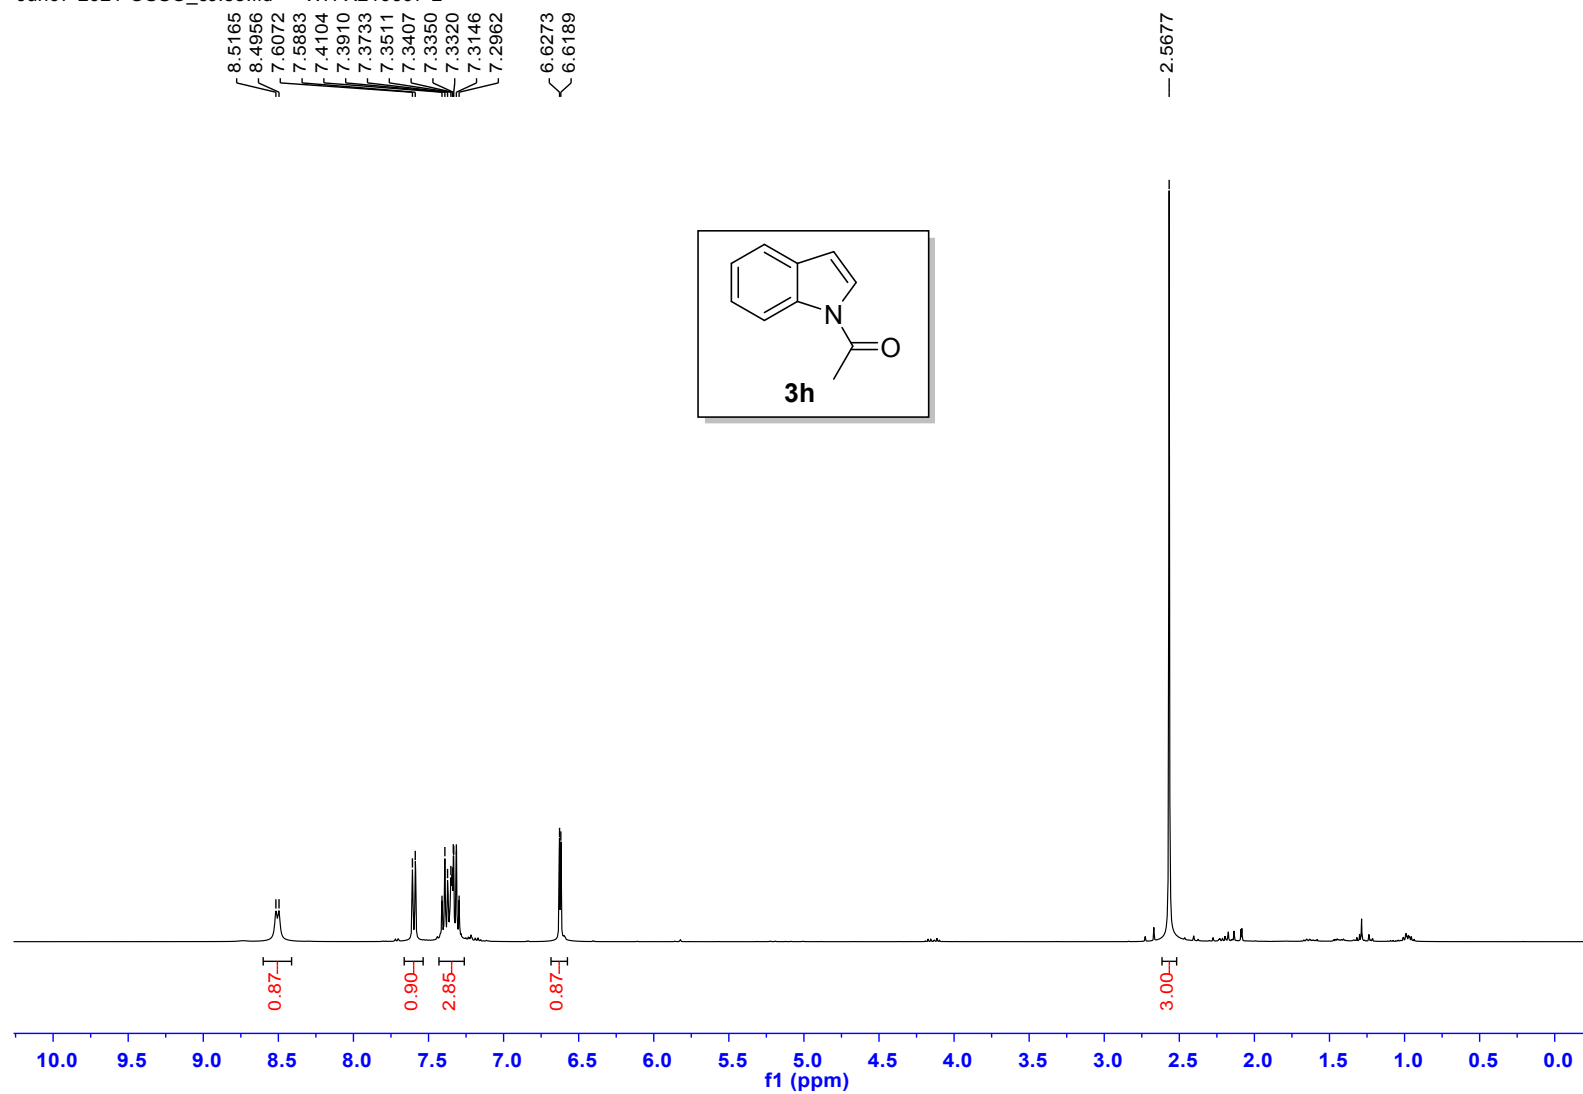

— 168.7716

— 135.5471  
— 130.4878  
— 125.3674  
— 125.0912  
— 123.6883  
— 120.8905  
— 116.5567  
— 109.0788

— 77.6106  
— 77.2913  
— 76.9727

— 23.8814

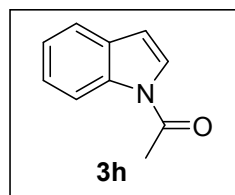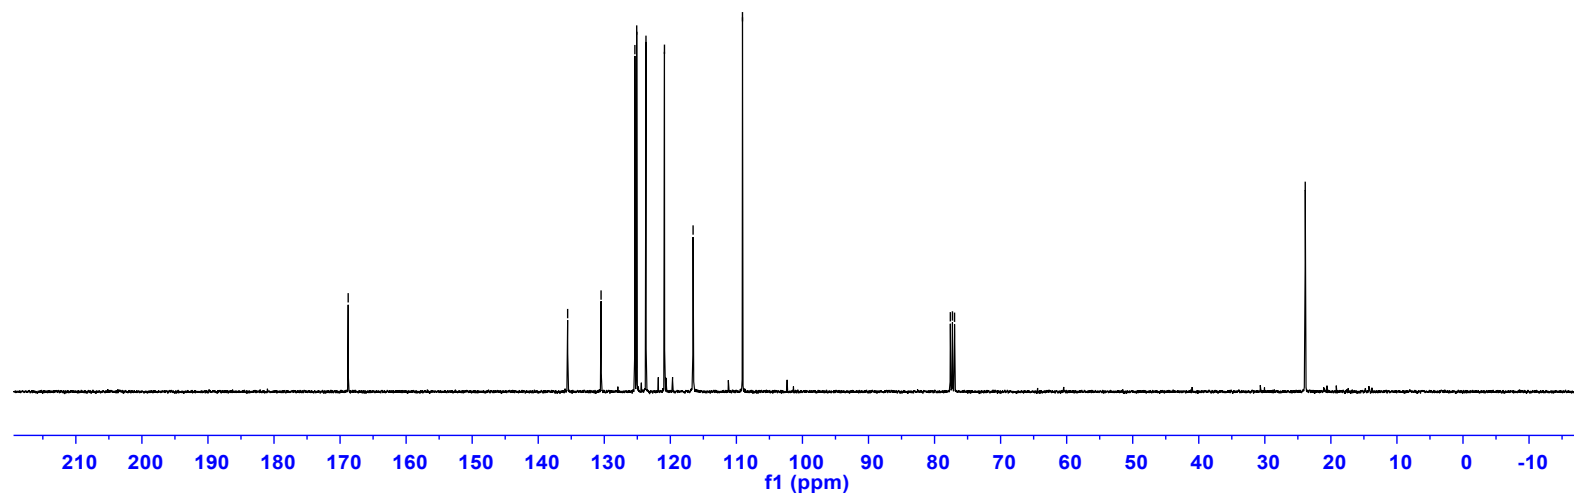

Supplement: d1cc02517a1.pdf [file d1cc02517a1.pdf]
